# Supplementary material for: Tumor-wide RNA splicing aberrations generate immunogenic public neoantigens
Source: bioRxiv preprint, doi:10.1101/2023.10.19.563178, version 1 (2023-10-20)
Supplement: Supplementary Table 1 [file 563178_file17.xlsx]

## Sheet: COAD
junc.id	chr	strand	int.start	int.end	canonical	symbol	ensg	enst
chr1:-:101467100-101479265	1	-	101467101	101479265	chr1:-:101460705-101479265;chr1:-:101467100-101487196;chr1:-:101467143-101479265;chr1:-:101477205-101479265	DPH5	ENSG00000117543	ENST00000370109
chr1:-:120341181-120342347	1	-	120341182	120342347	chr1:-:120337308-120342347;chr1:-:120341225-120342347	REG4	ENSG00000134193	ENST00000256585
chr1:-:153507303-153507677	1	-	153507304	153507677	chr1:-:153507306-153507677	S100A6	ENSG00000197956	ENST00000496817;ENST00000368719;ENST00000462776
chr1:-:17320330-17322485	1	-	17320331	17322485	chr1:-:17320330-17322470	ATP13A2	ENSG00000159363	ENST00000326735
chr1:-:204192713-204197855	1	-	204192714	204197855	chr1:-:204192713-204197210;chr1:-:204197356-204197855	PLEKHA6	ENSG00000143850	ENST00000272203
chr1:-:2338391-2339890	1	-	2338392	2339890	chr1:-:2338334-2339890;chr1:-:2338394-2339890	PEX10	ENSG00000157911	ENST00000447513
chr1:-:27280438-27286840	1	-	27280439	27286840	chr1:-:27278903-27286840	C1orf172	ENSG00000175707	ENST00000320567
chr1:-:6253108-6257711	1	-	6253109	6257711	chr1:-:6253114-6257711	RPL22	ENSG00000116251	ENST00000234875;ENST00000497965;ENST00000471204
chr1:+:109425247-109427896	1	+	109425248	109427896	chr1:+:109419850-109427896;chr1:+:109420196-109427896;chr1:+:109420396-109427896	GPSM2	ENSG00000121957	ENST00000264126
chr1:+:109716179-109716309	1	+	109716180	109716309	chr1:+:109716179-109730798;chr1:+:109716201-109716309	KIAA1324	ENSG00000116299	ENST00000369939
chr1:+:109730976-109731708	1	+	109730977	109731708	chr1:+:109730976-109731687	KIAA1324	ENSG00000116299	ENST00000369939
chr1:+:23208976-23219469	1	+	23208977	23219469	chr1:+:23208976-23217621;chr1:+:23208976-23219373;chr1:+:23208976-23219376	EPHB2	ENSG00000133216	ENST00000400191;ENST00000374632
chr1:+:24020403-24021186	1	+	24020404	24021186	chr1:+:24020403-24021149	RPL11	ENSG00000142676	ENST00000374550;ENST00000482370
chr1:+:2520064-2520395	1	+	2520065	2520395	chr1:+:2519892-2520395;chr1:+:2520064-2520360;chr1:+:2520064-2520392	FAM213B	ENSG00000157870	ENST00000419916;ENST00000378427
chr1:+:43826537-43826790	1	+	43826538	43826790	chr1:+:43826632-43826790	CDC20	ENSG00000117399	ENST00000310955
chr1:+:45243801-45244263	1	+	45243802	45244263	chr1:+:45243801-45244247	RPS8	ENSG00000142937	ENST00000396651;ENST00000372209
chr1:+:93300470-93301757	1	+	93300471	93301757	chr1:+:93300470-93301746	RPL5	ENSG00000122406	ENST00000370321
chr1:+:987025-987125	1	+	987026	987125	chr1:+:987025-987107	AGRN	ENSG00000188157	ENST00000379370
chr10:-:75006557-75006767	10	-	75006558	75006767	chr10:-:75006586-75006767	DNAJC9	ENSG00000213551	ENST00000372950
chr10:+:114154531-114154675	10	+	114154532	114154675	chr10:+:114134027-114154675;chr10:+:114135300-114154675;chr10:+:114136206-114154675	ACSL5	ENSG00000197142	ENST00000354655;ENST00000356116;ENST00000354273
chr10:+:60148583-60150527	10	+	60148584	60150527	no.hit	TFAM	ENSG00000108064	ENST00000487519;ENST00000373895
chr10:+:74644140-74645506	10	+	74644141	74645506	chr10:+:74644140-74645502	MCU	ENSG00000156026	ENST00000373053
chr10:+:95259842-95262869	10	+	95259843	95262869	chr10:+:95259991-95262869	CEP55	ENSG00000138180	ENST00000371485
chr11:-:102391535-102394084	11	-	102391536	102394084	chr11:-:102391535-102393970	MMP7	ENSG00000137673	ENST00000260227
chr11:-:102951733-102953476	11	-	102951734	102953476	chr11:-:102937296-102953476;chr11:-:102950726-102953476	DCUN1D5	ENSG00000137692	ENST00000260247
chr11:-:46765745-46765975	11	-	46765746	46765975	chr11:-:46765815-46765975	CKAP5	ENSG00000175216	ENST00000533413
chr11:-:47804698-47806473	11	-	47804699	47806473	chr11:-:47800716-47806473;chr11:-:47804750-47806473	NUP160	ENSG00000030066	ENST00000378460
chr11:-:74168648-74178442	11	-	74168649	74178442	chr11:-:74168648-74172999;chr11:-:74173148-74178442;chr11:-:74173900-74178442;chr11:-:74175370-74178442	KCNE3	ENSG00000175538	ENST00000310128
chr11:-:93470401-93471274	11	-	93470402	93471274	chr11:-:93470405-93471274	TAF1D	ENSG00000166012	ENST00000526015
chr11:+:130068313-130068841	11	+	130068314	130068841	chr11:+:130068313-130068402;chr11:+:130068516-130068841	ST14	ENSG00000149418	ENST00000278742
chr11:+:2549248-2604664	11	+	2549249	2604664	chr11:+:2549248-2591857;chr11:+:2594216-2604664	KCNQ1	ENSG00000053918	ENST00000155840
chr11:+:2798262-2799210	11	+	2798263	2799210	chr11:+:2798262-2799205	KCNQ1	ENSG00000053918	ENST00000155840
chr11:+:34673157-34678457	11	+	34673158	34678457	chr11:+:34673157-34673283;chr11:+:34673157-34678454	EHF	ENSG00000135373	ENST00000257831
chr11:+:396771-397088	11	+	396772	397088	no.hit	PKP3	ENSG00000184363	ENST00000331563
chr11:+:404323-404536	11	+	404324	404536	chr11:+:404323-404533	PKP3	ENSG00000184363	ENST00000331563
chr11:+:45827887-45829686	11	+	45827888	45829686	chr11:+:45827887-45832326	SLC35C1	ENSG00000181830	ENST00000314134
chr11:+:45830121-45832326	11	+	45830122	45832326	chr11:+:45827887-45832326	SLC35C1	ENSG00000181830	ENST00000314134
chr11:+:62439337-62439499	11	+	62439338	62439499	chr11:+:62439337-62439424	C11orf83	ENSG00000204922	ENST00000377953
chr11:+:66264948-66276549	11	+	66264949	66276549	chr11:+:66264948-66272082;chr11:+:66272245-66276549;chr11:+:66272253-66276549	DPP3	ENSG00000254986	ENST00000541961
chr11:+:67351640-67351967	11	+	67351641	67351967	chr11:+:67351640-67351934	GSTP1	ENSG00000084207	ENST00000398606
chr11:+:75112777-75113410	11	+	75112778	75113410	chr11:+:75112777-75113347;chr11:+:75112777-75113395;chr11:+:75112777-75115063;chr11:+:75112777-75115803	RPS3	ENSG00000149273	ENST00000530721;ENST00000422465;ENST00000278572;ENST00000532872;ENST00000534440;ENST00000526608;ENST00000527273;ENST00000524851;ENST00000526248
chr12:-:113616827-113616947	12	-	113616828	113616947	chr12:-:113616831-113616947	DDX54	ENSG00000123064	ENST00000314045
chr12:-:125284788-125292311	12	-	125284789	125292311	chr12:-:125284788-125292306	SCARB1	ENSG00000073060	ENST00000261693
chr12:-:125294811-125296415	12	-	125294812	125296415	chr12:-:125294835-125296415	SCARB1	ENSG00000073060	ENST00000261693
chr12:-:125396954-125397129	12	-	125396955	125397129	no.hit	UBC	ENSG00000150991	ENST00000538617;ENST00000339647
chr12:-:125397129-125397419	12	-	125397130	125397419	no.hit	UBC	ENSG00000150991	ENST00000538617;ENST00000339647
chr12:-:125397129-125398103	12	-	125397130	125398103	no.hit	UBC	ENSG00000150991	ENST00000538617;ENST00000339647
chr12:-:125397182-125397357	12	-	125397183	125397357	no.hit	UBC	ENSG00000150991	ENST00000538617;ENST00000339647
chr12:-:49317631-49318005	12	-	49317632	49318005	chr12:-:49317635-49318005;chr12:-:49317757-49318005	FKBP11	ENSG00000134285	ENST00000550765;ENST00000256680
chr12:-:49317633-49318005	12	-	49317634	49318005	chr12:-:49317635-49318005;chr12:-:49317757-49318005	FKBP11	ENSG00000134285	ENST00000550765;ENST00000256680
chr12:-:51639835-51640534	12	-	51639836	51640534	chr12:-:51639903-51640534	SMAGP	ENSG00000170545	ENST00000398453;ENST00000603864
chr12:-:51753116-51754563	12	-	51753117	51754563	chr12:-:51753116-51754504;chr12:-:51753116-51757904	GALNT6	ENSG00000139629	ENST00000543196
chr12:-:53292681-53293558	12	-	53292682	53293558	chr12:-:53292683-53293558	KRT8	ENSG00000170421	ENST00000552551;ENST00000293308;ENST00000547031
chr12:-:53298811-53301039	12	-	53298812	53301039	chr12:-:53298811-53300431;chr12:-:53298811-53320195;chr12:-:53298811-53343239;chr12:-:53298811-53343498	KRT8	ENSG00000170421	ENST00000552551
chr12:-:53298811-53335581	12	-	53298812	53335581	chr12:-:53298811-53300431;chr12:-:53298811-53320195;chr12:-:53298811-53343239;chr12:-:53298811-53343498	KRT8	ENSG00000170421	ENST00000552551
chr12:-:54581686-54582734	12	-	54581687	54582734	chr12:-:54576407-54582734;chr12:-:54577743-54582734;chr12:-:54581686-54582650;chr12:-:54581689-54582734;chr12:-:54582380-54582734	SMUG1	ENSG00000123415	ENST00000243112
chr12:-:57032980-57033763	12	-	57032981	57033763	chr12:-:57032980-57038954;chr12:-:57033091-57033763	ATP5B	ENSG00000110955	ENST00000262030
chr12:-:71551567-71551711	12	-	71551568	71551711	chr12:-:71551567-71551709	TSPAN8	ENSG00000127324	ENST00000247829
chr12:+:113349063-113354313	12	+	113349064	113354313	chr12:+:113345024-113354313;chr12:+:113349040-113354313	OAS1	ENSG00000089127	ENST00000202917;ENST00000452357
chr12:+:132416857-132425836	12	+	132416858	132425836	chr12:+:132416857-132417266;chr12:+:132416857-132423717;chr12:+:132416857-132428083;chr12:+:132417378-132425836;chr12:+:132423820-132425836	PUS1	ENSG00000177192	ENST00000443358
chr12:+:56510583-56510977	12	+	56510584	56510977	chr12:+:56510583-56510972;chr12:+:56510583-56511265	RPL41	ENSG00000229117	ENST00000546591;ENST00000501597;ENST00000546485;ENST00000358888;ENST00000552314
chr12:+:56510583-56510981	12	+	56510584	56510981	chr12:+:56510583-56510972;chr12:+:56510583-56511265	RPL41	ENSG00000229117	ENST00000546591;ENST00000501597;ENST00000546485;ENST00000358888;ENST00000552314
chr12:+:56554104-56555172	12	+	56554105	56555172	chr12:+:56554104-56554409;chr12:+:56554104-56555170	MYL6	ENSG00000092841	ENST00000550697;ENST00000548580;ENST00000348108;ENST00000547649;ENST00000548400
chr12:+:6309731-6310058	12	+	6309732	6310058	chr12:+:6309731-6315124;chr12:+:6309731-6334591	CD9	ENSG00000010278	ENST00000009180
chr12:+:6345441-6346975	12	+	6345442	6346975	chr12:+:6345441-6346928	CD9	ENSG00000010278	ENST00000009180
chr12:+:64825603-64827220	12	+	64825604	64827220	chr12:+:64825603-64827193	XPOT	ENSG00000184575	ENST00000332707
chr12:+:6646556-6646779	12	+	6646557	6646779	chr12:+:6646556-6646749	GAPDH	ENSG00000111640	ENST00000229239;ENST00000396856;ENST00000396859;ENST00000466525
chr13:-:30127997-30169280	13	-	30127998	30169280	chr13:-:30127997-30160861;chr13:-:30127997-30169552	SLC7A1	ENSG00000139514	ENST00000380752
chr13:-:76100764-76104249	13	-	76100765	76104249	chr13:-:76100775-76104249;chr13:-:76101987-76104249	COMMD6	ENSG00000188243	ENST00000355801;ENST00000377612;ENST00000460675
chr13:+:43629679-43633033	13	+	43629680	43633033	no.hit	DNAJC15	ENSG00000120675	ENST00000474320;ENST00000379221
chr13:+:80095110-80107463	13	+	80095111	80107463	chr13:+:80095110-80107457	NDFIP2	ENSG00000102471	ENST00000487865
chr14:-:24652044-24652181	14	-	24652045	24652181	chr14:-:24652048-24652181	IPO4	ENSG00000196497	ENST00000558046
chr14:+:54863795-54866616	14	+	54863796	54866616	chr14:+:54863795-54866611;chr14:+:54863795-54868241	CDKN3	ENSG00000100526	ENST00000335183
chr14:+:54875507-54878204	14	+	54875508	54878204	chr14:+:54875507-54878201	CDKN3	ENSG00000100526	ENST00000335183;ENST00000395577
chr15:-:64448341-64448923	15	-	64448342	64448923	chr15:-:64448344-64448923	PPIB	ENSG00000166794	ENST00000300026
chr16:-:87868128-87870103	16	-	87868129	87870103	chr16:-:87868197-87870103	SLC7A5	ENSG00000103257	ENST00000565644;ENST00000261622
chr16:+:67100701-67116118	16	+	67100702	67116118	chr16:+:67100701-67116115	CBFB	ENSG00000067955	ENST00000412916
chr16:+:89696922-89698980	16	+	89696923	89698980	chr16:+:89696922-89702315	DPEP1	ENSG00000015413	ENST00000261615
chr16:+:89702448-89702704	16	+	89702449	89702704	chr16:+:89702448-89702671	DPEP1	ENSG00000015413	ENST00000261615
chr16:+:89702784-89702940	16	+	89702785	89702940	chr16:+:89702804-89702940	DPEP1	ENSG00000015413	ENST00000261615
chr16:+:89703055-89703273	16	+	89703056	89703273	chr16:+:89703091-89703273	DPEP1	ENSG00000015413	ENST00000261615
chr16:+:89703343-89703683	16	+	89703344	89703683	chr16:+:89703343-89703611	DPEP1	ENSG00000015413	ENST00000261615
chr16:+:89703788-89703881	16	+	89703789	89703881	chr16:+:89703788-89703875	DPEP1	ENSG00000015413	ENST00000261615
chr16:+:89703960-89704243	16	+	89703961	89704243	chr16:+:89703960-89704039;chr16:+:89704115-89704243	DPEP1	ENSG00000015413	ENST00000261615
chr16:+:89704379-89704464	16	+	89704380	89704464	chr16:+:89704379-89704459	DPEP1	ENSG00000015413	ENST00000261615
chr17:-:38643709-38644797	17	-	38643710	38644797	chr17:-:38643712-38644797	TNS4	ENSG00000131746	ENST00000254051
chr17:-:41607320-41607489	17	-	41607321	41607489	chr17:-:41607320-41607474	ETV4	ENSG00000175832	ENST00000393664
chr17:-:41610698-41611226	17	-	41610699	41611226	chr17:-:41610307-41611226;chr17:-:41610716-41611226	ETV4	ENSG00000175832	ENST00000393664
chr17:-:46700497-46708098	17	-	46700498	46708098	chr17:-:46700497-46703114;chr17:-:46700497-46703353	HOXB7	ENSG00000260027	ENST00000567101
chr17:-:47780304-47780549	17	-	47780305	47780549	chr17:-:47780373-47780549	SLC35B1	ENSG00000121073	ENST00000507773
chr17:-:56440005-56440635	17	-	56440006	56440635	chr17:-:56440009-56440635	RNF43	ENSG00000108375	ENST00000583753;ENST00000584437
chr17:-:56492763-56494377	17	-	56492764	56494377	chr17:-:56448394-56494377;chr17:-:56493120-56494377;chr17:-:56493323-56494377	RNF43	ENSG00000108375	ENST00000584437
chr17:-:56492872-56494377	17	-	56492873	56494377	chr17:-:56448394-56494377;chr17:-:56493120-56494377;chr17:-:56493323-56494377	RNF43	ENSG00000108375	ENST00000584437
chr17:-:63554854-63555633	17	-	63554855	63555633	chr17:-:63554854-63555561;chr17:-:63554854-63556071;chr17:-:63554854-63556630;chr17:-:63554854-63556942;chr17:-:63554854-63557567	AXIN2	ENSG00000168646	ENST00000307078
chr17:-:74013960-74014241	17	-	74013961	74014241	chr17:-:74013992-74014241	EVPL	ENSG00000167880	ENST00000301607
chr17:-:76170866-76171130	17	-	76170867	76171130	chr17:-:76170869-76171130;chr17:-:76171031-76171130	TK1	ENSG00000167900	ENST00000301634
chr17:+:16285296-16285410	17	+	16285297	16285410	no.hit	UBB	ENSG00000170315	ENST00000302182;ENST00000577640;ENST00000535788
chr17:+:27074965-27075054	17	+	27074966	27075054	chr17:+:27074965-27075034	TRAF4	ENSG00000076604	ENST00000262395
chr18:-:28671101-28672063	18	-	28671102	28672063	chr18:-:28671110-28672063	DSC2	ENSG00000134755	ENST00000251081
chr18:-:47014927-47015728	18	-	47014928	47015728	chr18:-:47010141-47015728;chr18:-:47014936-47015728	RPL17-C18orf32;RPL17	ENSG00000215472;ENSG00000265681	ENST00000584895;ENST00000579408;ENST00000579248;ENST00000580261
chr19:-:3547519-3547845	19	-	3547520	3547845	chr19:-:3547545-3547845	MFSD12	ENSG00000161091	ENST00000355415
chr19:-:3978005-3979326	19	-	3978006	3979326	chr19:-:3978170-3979326	EEF2	ENSG00000167658	ENST00000309311
chr19:-:46216831-46220522	19	-	46216832	46220522	chr19:-:46216831-46218026;chr19:-:46216831-46226730;chr19:-:46216831-46234106	FBXO46	ENSG00000177051	ENST00000317683
chr19:-:49118676-49119183	19	-	49118677	49119183	no.hit	RPL18	ENSG00000063177	ENST00000547897;ENST00000084795;ENST00000550645;ENST00000549370
chr19:-:51522398-51522882	19	-	51522399	51522882	chr19:-:51522395-51522882	KLK10	ENSG00000129451	ENST00000358789
chr19:-:55832461-55832738	19	-	55832462	55832738	chr19:-:55832461-55834015	TMEM150B	ENSG00000180061	ENST00000326652
chr19:+:11107056-11107172	19	+	11107057	11107172	chr19:+:11107056-11107169	SMARCA4	ENSG00000127616	ENST00000444061
chr19:+:11169565-11170455	19	+	11169566	11170455	chr19:+:11169565-11170428	SMARCA4	ENSG00000127616	ENST00000444061;ENST00000592604
chr19:+:13885521-13888872	19	+	13885522	13888872	chr19:+:13885521-13886284;chr19:+:13885521-13886290;chr19:+:13885521-13888865	C19orf53	ENSG00000104979	ENST00000588234;ENST00000221576;ENST00000588841
chr19:+:18684558-18685681	19	+	18684559	18685681	chr19:+:18684558-18685679	UBA52	ENSG00000221983	ENST00000430157;ENST00000442744;ENST00000597451
chr19:+:2271473-2271780	19	+	2271474	2271780	chr19:+:2269743-2271780;chr19:+:2271529-2271780	OAZ1	ENSG00000104904	ENST00000592787;ENST00000602676;ENST00000592727
chr19:+:35612149-35613678	19	+	35612150	35613678	chr19:+:35612149-35613581;chr19:+:35612149-35613668	FXYD3	ENSG00000089356	ENST00000604404;ENST00000603181;ENST00000604255;ENST00000346446;ENST00000605550;ENST00000604804;ENST00000604621
chr19:+:48284645-48287551	19	+	48284646	48287551	chr19:+:48284645-48287546;chr19:+:48284645-48287662	SEPW1	ENSG00000178980	ENST00000601048;ENST00000601419;ENST00000601937
chr19:+:49994088-49994329	19	+	49994089	49994329	no.hit	RPL13A	ENSG00000142541	ENST00000391857;ENST00000472481;ENST00000477613;ENST00000467825
chr19:+:49994804-49994987	19	+	49994805	49994987	chr19:+:49994804-49994985	RPL13A	ENSG00000142541	ENST00000391857;ENST00000477613;ENST00000467825
chr19:+:50000556-50000776	19	+	50000557	50000776	chr19:+:50000582-50000776	RPS11	ENSG00000142534	ENST00000600027;ENST00000270625;ENST00000602252
chr19:+:50781436-50783293	19	+	50781437	50783293	chr19:+:50781546-50783293	MYH14	ENSG00000105357	ENST00000425460;ENST00000262269
chr19:+:55898039-55899297	19	+	55898040	55899297	chr19:+:55898042-55899297;chr19:+:55898061-55899297	RPL28	ENSG00000108107	ENST00000558815;ENST00000559463;ENST00000558131
chr19:+:5691422-5691542	19	+	5691423	5691542	chr19:+:5691464-5691542	RPL36	ENSG00000130255	ENST00000579649;ENST00000347512;ENST00000579446;ENST00000394580
chr2:-:20404052-20405109	2	-	20404053	20405109	chr2:-:20404052-20405103	SDC1	ENSG00000115884	ENST00000254351;ENST00000381150
chr2:-:219001-224867	2	-	219002	224867	chr2:-:219001-224863;chr2:-:219001-229965;chr2:-:222954-224867	SH3YL1	ENSG00000035115	ENST00000403712;ENST00000356150
chr2:-:230044-231086	2	-	230045	231086	chr2:-:230044-230546;chr2:-:230044-231022	SH3YL1	ENSG00000035115	ENST00000403712;ENST00000356150
chr2:-:27294331-27294473	2	-	27294332	27294473	chr2:-:27294331-27294468	OST4	ENSG00000228474	ENST00000456793
chr2:-:27424938-27425680	2	-	27424939	27425680	chr2:-:27424942-27425680	SLC5A6	ENSG00000138074	ENST00000310574
chr2:-:27427799-27428279	2	-	27427800	27428279	chr2:-:27427799-27428217	SLC5A6	ENSG00000138074	ENST00000310574
chr2:-:55494771-55495785	2	-	55494772	55495785	chr2:-:55494771-55495713;chr2:-:55494771-55495952;chr2:-:55494771-55496304	MTIF2	ENSG00000085760	ENST00000263629
chr2:-:74654719-74655757	2	-	74654720	74655757	chr2:-:74654719-74655394;chr2:-:74655523-74655757	RTKN	ENSG00000114993	ENST00000272430
chr2:+:135119715-135119845	2	+	135119716	135119845	chr2:+:135107509-135119845	MGAT5	ENSG00000152127	ENST00000281923
chr2:+:174219712-174223442	2	+	174219713	174223442	chr2:+:174219712-174223439;chr2:+:174219712-174227953	CDCA7	ENSG00000144354	ENST00000347703;ENST00000306721
chr2:+:192250699-192251949	2	+	192250700	192251949	chr2:+:192250810-192251949	MYO1B	ENSG00000128641	ENST00000339514;ENST00000392316
chr2:+:200824603-200826549	2	+	200824604	200826549	chr2:+:200824603-200826503;chr2:+:200824603-200828455	C2orf47	ENSG00000162972	ENST00000392290
chr2:+:207025697-207026077	2	+	207025698	207026077	no.hit	EEF1B2	ENSG00000114942	ENST00000236957;ENST00000392221;ENST00000392222;ENST00000455150
chr2:+:219290481-219292687	2	+	219290482	219292687	chr2:+:219290522-219292687;chr2:+:219290534-219292687	VIL1	ENSG00000127831	ENST00000248444;ENST00000454069;ENST00000392114;ENST00000440053
chr2:+:219296680-219297515	2	+	219296681	219297515	chr2:+:219296680-219296768;chr2:+:219296906-219297515;chr2:+:219297285-219297515	VIL1	ENSG00000127831	ENST00000248444;ENST00000392114
chr2:+:223799405-223806218	2	+	223799406	223806218	chr2:+:223799405-223806214	ACSL3	ENSG00000123983	ENST00000357430;ENST00000392066;ENST00000407441
chr2:+:232577226-232577636	2	+	232577227	232577636	chr2:+:232577226-232577513	PTMA	ENSG00000187514	ENST00000409115;ENST00000341369
chr2:+:27665307-27666264	2	+	27665308	27666264	chr2:+:27665307-27665445;chr2:+:27665307-27665708;chr2:+:27666147-27666264	KRTCAP3	ENSG00000157992	ENST00000288873;ENST00000453171
chr2:+:86361500-86361967	2	+	86361501	86361967	chr2:+:86361500-86361961	PTCD3	ENSG00000132300	ENST00000254630
chr2:+:97490938-97493467	2	+	97490939	97493467	chr2:+:97490938-97492569;chr2:+:97492719-97493467	CNNM3	ENSG00000168763	ENST00000305510
chr2:+:97493637-97493840	2	+	97493638	97493840	chr2:+:97493637-97493835	CNNM3	ENSG00000168763	ENST00000305510
chr20:-:6060176-6064686	20	-	6060177	6064686	chr20:-:6060224-6064686	FERMT1	ENSG00000101311	ENST00000478194;ENST00000217289
chr20:-:6065934-6068455	20	-	6065935	6068455	chr20:-:6065934-6068423	FERMT1	ENSG00000101311	ENST00000478194;ENST00000217289
chr20:-:6077641-6078170	20	-	6077642	6078170	chr20:-:6077680-6078170	FERMT1	ENSG00000101311	ENST00000217289
chr20:-:6100386-6103420	20	-	6100387	6103420	chr20:-:6100219-6103420	FERMT1	ENSG00000101311	ENST00000217289
chr20:+:25198217-25203473	20	+	25198218	25203473	chr20:+:25198217-25199185;chr20:+:25199250-25203473;chr20:+:25201969-25203473;chr20:+:25203062-25203473	ENTPD6	ENSG00000197586	ENST00000354989;ENST00000360031;ENST00000376652;ENST00000433259;ENST00000376666
chr20:+:30327424-30345209	20	+	30327425	30345209	chr20:+:30327424-30330343;chr20:+:30330450-30345209	TPX2	ENSG00000088325	ENST00000300403
chr20:+:30354485-30358148	20	+	30354486	30358148	chr20:+:30354485-30358145	TPX2	ENSG00000088325	ENST00000300403
chr20:+:35173471-35176439	20	+	35173472	35176439	chr20:+:35173471-35176434;chr20:+:35173471-35177479	MYL9	ENSG00000101335	ENST00000279022;ENST00000346786
chr20:+:372223-376845	20	+	372224	376845	chr20:+:372223-376841	TRIB3	ENSG00000101255	ENST00000217233
chr20:+:42339450-42340127	20	+	42339451	42340127	chr20:+:42338702-42340127	MYBL2	ENSG00000101057	ENST00000217026
chr20:+:42341746-42343802	20	+	42341747	42343802	chr20:+:42341746-42343773	MYBL2	ENSG00000101057	ENST00000217026
chr20:+:43034872-43036010	20	+	43034873	43036010	chr20:+:43034872-43036020	HNF4A	ENSG00000101076	ENST00000316673
chr20:+:44443109-44444492	20	+	44443110	44444492	chr20:+:44442103-44444492;chr20:+:44443109-44444028;chr20:+:44443109-44444081;chr20:+:44443109-44444179;chr20:+:44444179-44444492;chr20:+:44444384-44444492	UBE2C	ENSG00000175063	ENST00000356455;ENST00000352551
chr20:+:55949857-55951234	20	+	55949858	55951234	chr20:+:55949857-55953068	RAE1	ENSG00000101146	ENST00000371242;ENST00000492498
chr20:+:55951322-55953068	20	+	55951323	55953068	chr20:+:55949857-55953068	RAE1	ENSG00000101146	ENST00000371242;ENST00000492498
chr20:+:57485456-57485739	20	+	57485457	57485739	chr20:+:57485456-57485737	GNAS	ENSG00000087460	ENST00000477931;ENST00000480975;ENST00000371095;ENST00000371085;ENST00000354359;ENST00000265620
chr21:-:40551897-40552210	21	-	40551898	40552210	chr21:-:40550573-40552210;chr21:-:40551912-40552210	PSMG1	ENSG00000183527	ENST00000411828;ENST00000431628;ENST00000380900
chr22:+:24123287-24123383	22	+	24123288	24123383	chr22:+:24123287-24123379	MMP11	ENSG00000099953	ENST00000215743
chr3:-:122090577-122102020	3	-	122090578	122102020	chr3:-:122081874-122102020;chr3:-:122090647-122102020	CCDC58	ENSG00000160124	ENST00000291458
chr3:-:195800996-195802085	3	-	195800997	195802085	chr3:-:195800996-195802029;chr3:-:195800996-195803934	TFRC	ENSG00000072274	ENST00000420415;ENST00000360110
chr3:-:53875026-53879848	3	-	53875027	53879848	chr3:-:53875026-53878608;chr3:-:53875026-53878739;chr3:-:53875026-53880109	CHDH	ENSG00000016391	ENST00000315251
chr3:+:127387427-127387983	3	+	127387428	127387983	chr3:+:127387440-127387983	PODXL2	ENSG00000114631	ENST00000342480
chr3:+:169800546-169801692	3	+	169800547	169801692	chr3:+:169797685-169801692;chr3:+:169801310-169801692	GPR160	ENSG00000173890	ENST00000355897
chr3:+:32493965-32495738	3	+	32493966	32495738	chr3:+:32493965-32495732	CMTM7	ENSG00000153551	ENST00000465248
chr3:+:40500227-40502907	3	+	40500228	40502907	chr3:+:40500227-40502897	RPL14	ENSG00000188846	ENST00000338970;ENST00000396203;ENST00000416518;ENST00000479563
chr3:+:46621343-46622621	3	+	46621344	46622621	chr3:+:46621343-46621440;chr3:+:46621550-46622621	TDGF1	ENSG00000241186	ENST00000542931
chr4:-:187525131-187525536	4	-	187525132	187525536	chr4:-:187525131-187525530	FAT1	ENSG00000083857	ENST00000441802
chr4:-:25792176-25803904	4	-	25792177	25803904	chr4:-:25792196-25803904	SEL1L3	ENSG00000091490	ENST00000264868
chr4:-:39458098-39459205	4	-	39458099	39459205	chr4:-:39458158-39459205	RPL9	ENSG00000163682	ENST00000295955;ENST00000449470;ENST00000504470
chr4:+:154125712-154191489	4	+	154125713	154191489	chr4:+:154125712-154143394;chr4:+:154125712-154191486;chr4:+:154178918-154191489	TRIM2	ENSG00000109654	ENST00000338700
chr4:+:1733028-1737005	4	+	1733029	1737005	chr4:+:1733028-1736999	TACC3	ENSG00000013810	ENST00000313288
chr5:-:14711413-14712982	5	-	14711414	14712982	chr5:-:14711419-14712982	ANKH	ENSG00000154122	ENST00000284268;ENST00000502585
chr5:-:14769300-14848884	5	-	14769301	14848884	chr5:-:14769300-14788224;chr5:-:14769300-14871460	ANKH	ENSG00000154122	ENST00000284268
chr5:-:60458183-60458272	5	-	60458184	60458272	chr5:-:60458186-60458272	SMIM15	ENSG00000188725	ENST00000339020;ENST00000507416
chr5:+:126141388-126145874	5	+	126141389	126145874	chr5:+:126141388-126145871	LMNB1	ENSG00000113368	ENST00000261366;ENST00000504788
chr5:+:74647140-74647341	5	+	74647141	74647341	chr5:+:74647140-74647248	HMGCR	ENSG00000113161	ENST00000287936
chr6:-:13327195-13328547	6	-	13327196	13328547	chr6:-:13327138-13328547;chr6:-:13327195-13327909;chr6:-:13327195-13328064;chr6:-:13327195-13328527;chr6:-:13327195-13328687	TBC1D7	ENSG00000145979	ENST00000356436
chr6:-:1690808-1726649	6	-	1690809	1726649	chr6:-:1624775-1726649;chr6:-:1680160-1726649;chr6:-:1717877-1726649	GMDS	ENSG00000112699	ENST00000530927;ENST00000380815
chr6:-:30168900-30172432	6	-	30168901	30172432	chr6:-:30166924-30172432;chr6:-:30168860-30172432;chr6:-:30168915-30172432	TRIM26	ENSG00000234127	ENST00000453195
chr6:-:31704117-31704259	6	-	31704118	31704259	no.hit	CLIC1	ENSG00000213719	ENST00000375784;ENST00000375779
chr6:-:32800238-32800412	6	-	32800239	32800412	chr6:-:32800238-32800403	TAP2	ENSG00000204267	ENST00000374897
chr6:-:99994335-99997383	6	-	99994336	99997383	chr6:-:99994350-99997383;chr6:-:99997275-99997383	CCNC	ENSG00000112237	ENST00000369220
chr6:+:150518569-150535879	6	+	150518570	150535879	chr6:+:150464634-150535879	PPP1R14C	ENSG00000198729	ENST00000361131
chr6:+:29910336-29910670	6	+	29910337	29910670	no.hit	HLA-A	ENSG00000206503	ENST00000376809;ENST00000496081
chr6:+:31911304-31911423	6	+	31911305	31911423	chr6:+:31911304-31911420	C2	ENSG00000166278	ENST00000299367;ENST00000442278
chr6:+:31912003-31912561	6	+	31912004	31912561	chr6:+:31912003-31912503	C2	ENSG00000166278	ENST00000299367;ENST00000442278
chr6:+:31912806-31913134	6	+	31912807	31913134	chr6:+:31912806-31912954;chr6:+:31912806-31913238	C2	ENSG00000166278	ENST00000299367;ENST00000442278
chr6:+:7413175-7414486	6	+	7413176	7414486	chr6:+:7413175-7414470	RIOK1	ENSG00000124784	ENST00000379834
chr7:-:2275199-2279164	7	-	2275200	2279164	chr7:-:2275199-2277649;chr7:-:2275199-2278468;chr7:-:2275199-2278815;chr7:-:2275199-2279052	FTSJ2	ENSG00000122687	ENST00000242257
chr7:-:47481653-47510040	7	-	47481654	47510040	chr7:-:47481653-47492530;chr7:-:47481653-47520700	TNS3	ENSG00000136205	ENST00000311160
chr7:-:50544341-50571690	7	-	50544342	50571690	chr7:-:50544341-50547484;chr7:-:50563115-50571690;chr7:-:50566940-50571690	DDC	ENSG00000132437	ENST00000444124
chr7:-:72985642-72987173	7	-	72985643	72987173	chr7:-:72985671-72987173;chr7:-:72986365-72987173	TBL2	ENSG00000106638	ENST00000450285
chr7:-:72987275-72987649	7	-	72987276	72987649	chr7:-:72987300-72987649	TBL2	ENSG00000106638	ENST00000450285
chr7:-:75443070-75452639	7	-	75443071	75452639	chr7:-:75443092-75452639	CCL24	ENSG00000106178	ENST00000416943
chr7:-:75443092-75444139	7	-	75443093	75444139	chr7:-:75443092-75452639	CCL24	ENSG00000106178	ENST00000416943
chr7:-:75443092-75445475	7	-	75443093	75445475	chr7:-:75443092-75452639	CCL24	ENSG00000106178	ENST00000416943
chr7:-:75444260-75445475	7	-	75444261	75445475	no.hit	CCL24	ENSG00000106178	ENST00000416943
chr7:-:75444260-75452639	7	-	75444261	75452639	chr7:-:75443092-75452639	CCL24	ENSG00000106178	ENST00000416943
chr7:-:75445587-75452639	7	-	75445588	75452639	chr7:-:75443092-75452639	CCL24	ENSG00000106178	ENST00000416943
chr7:-:97939904-97941411	7	-	97939905	97941411	chr7:-:97939904-97941408	BAIAP2L1	ENSG00000006453	ENST00000005260
chr7:+:26223404-26224183	7	+	26223405	26224183	chr7:+:26223404-26224152	NFE2L3	ENSG00000050344	ENST00000056233
chr7:+:2696168-2696777	7	+	2696169	2696777	chr7:+:2696168-2697919	TTYH3	ENSG00000136295	ENST00000258796;ENST00000407643;ENST00000403167
chr7:+:32598240-32598834	7	+	32598241	32598834	chr7:+:32598240-32598540	AVL9	ENSG00000105778	ENST00000318709
chr7:+:36459076-36459777	7	+	36459077	36459777	chr7:+:36459088-36459777	ANLN	ENSG00000011426	ENST00000265748
chr7:+:98935908-98946515	7	+	98935909	98946515	chr7:+:98935908-98937480;chr7:+:98935908-98941915	ARPC1A	ENSG00000241685	ENST00000262942
chr8:-:11704125-11704560	8	-	11704126	11704560	chr8:-:11703298-11704560	CTSB	ENSG00000164733	ENST00000353047;ENST00000453527;ENST00000533455
chr8:-:144657070-144657162	8	-	144657071	144657162	chr8:-:144657070-144657155	NAPRT1	ENSG00000147813	ENST00000498076;ENST00000340490;ENST00000426292
chr8:-:144657070-144657592	8	-	144657071	144657592	chr8:-:144657070-144657155;chr8:-:144657515-144657592	NAPRT1	ENSG00000147813	ENST00000340490;ENST00000426292
chr8:-:144657235-144657360	8	-	144657236	144657360	chr8:-:144657263-144657360	NAPRT1	ENSG00000147813	ENST00000498076;ENST00000340490;ENST00000426292
chr8:-:48710943-48711770	8	-	48710944	48711770	chr8:-:48710958-48711770	PRKDC	ENSG00000253729	ENST00000314191
chr8:-:77896429-77898422	8	-	77896430	77898422	chr8:-:77896431-77898422	PEX2	ENSG00000164751	ENST00000522527
chr8:-:99057310-99057574	8	-	99057311	99057574	chr8:-:99055003-99057574;chr8:-:99057316-99057574	RPL30	ENSG00000156482	ENST00000521291;ENST00000396070;ENST00000518850;ENST00000287038;ENST00000517489
chr8:+:101225656-101232506	8	+	101225657	101232506	chr8:+:101225656-101226046;chr8:+:101225656-101237400;chr8:+:101226146-101232506	SPAG1	ENSG00000104450	ENST00000251809
chr8:+:30359095-30361802	8	+	30359096	30361802	chr8:+:30336893-30361802	RBPMS	ENSG00000157110	ENST00000519647
chr8:+:41469511-41469707	8	+	41469512	41469707	chr8:+:41469511-41469698	AGPAT6	ENSG00000158669	ENST00000396987
chr8:+:57124396-57127160	8	+	57124397	57127160	chr8:+:57124396-57125320;chr8:+:57124396-57127156	CHCHD7	ENSG00000170791	ENST00000521831;ENST00000355315
chr8:+:64081373-64081945	8	+	64081374	64081945	chr8:+:64081460-64081945;chr8:+:64081567-64081945;chr8:+:64081664-64081945;chr8:+:64081670-64081945	YTHDF3	ENSG00000185728	ENST00000539294
chr9:-:115030475-115060120	9	-	115030476	115060120	chr9:-:115030475-115038123;chr9:-:115030475-115060111;chr9:-:115030475-115095749;chr9:-:115038293-115060120	PTBP3	ENSG00000119314	ENST00000374257
chr9:-:139960826-139964155	9	-	139960827	139964155	chr9:-:139960826-139964341	SAPCD2	ENSG00000186193	ENST00000409687
chr9:-:140087137-140093438	9	-	140087138	140093438	chr9:-:140087143-140093438	TPRN	ENSG00000176058	ENST00000333046;ENST00000409012
chr9:-:19376587-19378365	9	-	19376588	19378365	chr9:-:19376649-19378365	RPS6	ENSG00000137154	ENST00000380394;ENST00000315377
chr9:-:19378817-19378858	9	-	19378818	19378858	no.hit	RPS6	ENSG00000137154	ENST00000380394;ENST00000315377
chr9:+:134361569-134362601	9	+	134361570	134362601	chr9:+:134361569-134362553	PRRC2B	ENSG00000130723	ENST00000357304
chr9:+:35679339-35679901	9	+	35679340	35679901	chr9:+:35679339-35679850	CA9	ENSG00000107159	ENST00000378357
chr9:+:91926260-91930084	9	+	91926261	91930084	chr9:+:91926266-91930084	CKS2	ENSG00000123975	ENST00000314355
chrX:-:100099067-100104760	X	-	100099068	100104760	chrX:-:100099067-100103618;chrX:-:100103743-100104760;chrX:-:100104415-100104760	NOX1	ENSG00000007952	ENST00000372966;ENST00000217885
chrX:-:100105375-100117159	X	-	100105376	100117159	chrX:-:100105375-100106221;chrX:-:100106314-100117159	NOX1	ENSG00000007952	ENST00000372966;ENST00000217885
chrX:-:128945485-128947636	X	-	128945486	128947636	chrX:-:128945485-128946693	ZDHHC9	ENSG00000188706	ENST00000357166;ENST00000371064
chrX:-:128963117-128975894	X	-	128963118	128975894	chrX:-:128963117-128975754	ZDHHC9	ENSG00000188706	ENST00000357166;ENST00000371064
chrX:-:128963117-128975906	X	-	128963118	128975906	chrX:-:128963117-128975754	ZDHHC9	ENSG00000188706	ENST00000357166;ENST00000371064
chrX:-:19606916-19610184	X	-	19606917	19610184	chrX:-:19606920-19610184	SH3KBP1	ENSG00000147010	ENST00000379698
chrX:-:23858494-23863776	X	-	23858495	23863776	chrX:-:23858494-23874418	APOO	ENSG00000184831	ENST00000379226;ENST00000439528
chrX:-:23897151-23925810	X	-	23897152	23925810	chrX:-:23897151-23898961;chrX:-:23899069-23925810	APOO	ENSG00000184831	ENST00000379226
chrX:-:2853231-2854799	X	-	2853232	2854799	chrX:-:2853231-2854782	ARSE	ENSG00000157399	ENST00000381134
chrX:-:2861240-2871183	X	-	2861241	2871183	chrX:-:2861240-2864038;chrX:-:2867768-2871183;chrX:-:2871033-2871183	ARSE	ENSG00000157399	ENST00000381134
chrX:-:70328196-70328470	X	-	70328197	70328470	chrX:-:70328196-70328448;chrX:-:70328196-70329077	IL2RG	ENSG00000147168	ENST00000374202
chrX:-:70328543-70329077	X	-	70328544	70329077	chrX:-:70328196-70329077;chrX:-:70328545-70329077	IL2RG	ENSG00000147168	ENST00000374202
chrX:-:7870179-7880068	X	-	7870180	7880068	chrX:-:7870182-7880068	PNPLA4	ENSG00000006757	ENST00000442940
chrX:+:16754355-16759844	X	+	16754356	16759844	chrX:+:16754355-16759838	SYAP1	ENSG00000169895	ENST00000380155
chr1:-:120345788-120345937	1	-	120345789	120345937	chr1:-:120345788-120351325	REG4	ENSG00000134193	ENST00000256585
chr1:-:120351478-120354031	1	-	120351479	120354031	chr1:-:120351486-120354031;chr1:-:120351825-120354031	REG4	ENSG00000134193	ENST00000256585
chr1:-:152006262-152009388	1	-	152006263	152009388	chr1:-:152006276-152009388	S100A11	ENSG00000163191	ENST00000271638
chr1:-:153507306-153508424	1	-	153507307	153508424	chr1:-:153507306-153507677;chr1:-:153507836-153508424;chr1:-:153507851-153508424	S100A6	ENSG00000197956	ENST00000496817;ENST00000368719;ENST00000462776
chr1:-:153507794-153508424	1	-	153507795	153508424	chr1:-:153507836-153508424;chr1:-:153507851-153508424	S100A6	ENSG00000197956	ENST00000496817;ENST00000368719;ENST00000462776;ENST00000462951
chr1:-:153507829-153508424	1	-	153507830	153508424	chr1:-:153507836-153508424;chr1:-:153507851-153508424	S100A6	ENSG00000197956	ENST00000496817;ENST00000368719;ENST00000462776;ENST00000462951
chr1:-:153507836-153508592	1	-	153507837	153508592	chr1:-:153507836-153508264;chr1:-:153507836-153508424	S100A6	ENSG00000197956	ENST00000496817;ENST00000368719
chr1:-:155142333-155145696	1	-	155142334	155145696	chr1:-:155142333-155144826;chr1:-:155142333-155145040;chr1:-:155145368-155145696	KRTCAP2	ENSG00000163463	ENST00000295682
chr1:-:156712852-156712886	1	-	156712853	156712886	no.hit	HDGF	ENSG00000143321	ENST00000357325;ENST00000368209;ENST00000537739
chr1:-:159889583-159890119	1	-	159889584	159890119	chr1:-:159889625-159890119	TAGLN2	ENSG00000158710	ENST00000368097;ENST00000320307
chr1:-:159890288-159895239	1	-	159890289	159895239	chr1:-:159890327-159895239	TAGLN2	ENSG00000158710	ENST00000368097
chr1:-:17735152-17735475	1	-	17735153	17735475	chr1:-:17735050-17735475	RCC2	ENSG00000179051	ENST00000375436
chr1:-:202698231-202698834	1	-	202698232	202698834	chr1:-:202698301-202698834	KDM5B	ENSG00000117139	ENST00000367264
chr1:-:207103749-207104841	1	-	207103750	207104841	chr1:-:207103758-207104841	PIGR	ENSG00000162896	ENST00000356495
chr1:-:207113929-207119612	1	-	207113930	207119612	chr1:-:207113929-207119680	PIGR	ENSG00000162896	ENST00000356495
chr1:-:212002665-212003524	1	-	212002666	212003524	chr1:-:212002661-212003524;chr1:-:212002665-212002791;chr1:-:212002665-212003914	LPGAT1	ENSG00000123684	ENST00000366997
chr1:-:45984726-45987306	1	-	45984727	45987306	chr1:-:45984726-45987280;chr1:-:45984726-45987500;chr1:-:45984726-45987529	PRDX1	ENSG00000117450	ENST00000319248
chr1:-:6246770-6252989	1	-	6246771	6252989	chr1:-:6246876-6252989	RPL22	ENSG00000116251	ENST00000234875;ENST00000497965;ENST00000471204
chr1:-:6246876-6257711	1	-	6246877	6257711	chr1:-:6246876-6252989;chr1:-:6253114-6257711	RPL22	ENSG00000116251	ENST00000234875;ENST00000497965;ENST00000471204
chr1:-:6257810-6259621	1	-	6257811	6259621	chr1:-:6257816-6259621	RPL22	ENSG00000116251	ENST00000234875;ENST00000497965;ENST00000471204
chr1:+:109743522-109745567	1	+	109743523	109745567	chr1:+:109743522-109743940;chr1:+:109743522-109745534;chr1:+:109743522-109745565	KIAA1324	ENSG00000116299	ENST00000369939
chr1:+:183191346-183192292	1	+	183191347	183192292	chr1:+:183191346-183192269	LAMC2	ENSG00000058085	ENST00000264144
chr1:+:205481588-205492274	1	+	205481589	205492274	chr1:+:205473924-205492274;chr1:+:205474006-205492274;chr1:+:205486162-205492274	CDK18	ENSG00000117266	ENST00000360066
chr1:+:24020403-24022287	1	+	24020404	24022287	chr1:+:24020403-24021149;chr1:+:24021281-24022287	RPL11	ENSG00000142676	ENST00000374550;ENST00000482370
chr1:+:93300470-93306107	1	+	93300471	93306107	chr1:+:93300470-93301746;chr1:+:93303190-93306107	RPL5	ENSG00000122406	ENST00000370321
chr1:+:989931-990756	1	+	989932	990756	chr1:+:989931-990203	AGRN	ENSG00000188157	ENST00000379370
chr10:-:12214865-12219791	10	-	12214866	12219791	chr10:-:12214865-12215716;chr10:-:12215812-12219791	NUDT5	ENSG00000165609	ENST00000378937;ENST00000537776
chr10:-:126677954-126678070	10	-	126677955	126678070	no.hit	CTBP2	ENSG00000175029	ENST00000337195;ENST00000531469
chr10:-:73578481-73579221	10	-	73578482	73579221	chr10:-:73578481-73578787;chr10:-:73578868-73579221	PSAP	ENSG00000197746	ENST00000394936
chr10:-:81915664-81917396	10	-	81915665	81917396	chr10:-:81915668-81917396;chr10:-:81916254-81917396	ANXA11	ENSG00000122359	ENST00000422982;ENST00000463340
chr10:+:14909294-14909783	10	+	14909295	14909783	chr10:+:14909294-14909734	HSPA14	ENSG00000187522	ENST00000378372
chr10:+:72307202-72310792	10	+	72307203	72310792	chr10:+:72307202-72324119	PALD1	ENSG00000107719	ENST00000263563
chr10:+:79794179-79795109	10	+	79794180	79795109	chr10:+:79793662-79795109;chr10:+:79793744-79795109;chr10:+:79794074-79795109	RPS24	ENSG00000138326	ENST00000435275;ENST00000485708;ENST00000372360;ENST00000464716;ENST00000360830
chr10:+:79798033-79799961	10	+	79798034	79799961	chr10:+:79797062-79799961;chr10:+:79797740-79799961	RPS24	ENSG00000138326	ENST00000435275;ENST00000485708;ENST00000372360;ENST00000360830
chr11:-:102391535-102395666	11	-	102391536	102395666	chr11:-:102391535-102393970;chr11:-:102394132-102395666	MMP7	ENSG00000137673	ENST00000260227
chr11:-:119982166-119982505	11	-	119982167	119982505	no.hit	TRIM29	ENSG00000137699	ENST00000524816
chr11:-:17096744-17097135	11	-	17096745	17097135	chr11:-:17096744-17097000	RPS13	ENSG00000110700	ENST00000228140;ENST00000525634;ENST00000525828
chr11:-:17097119-17098714	11	-	17097120	17098714	chr11:-:17097170-17098714;chr11:-:17098094-17098714	RPS13	ENSG00000110700	ENST00000228140;ENST00000525634;ENST00000525828
chr11:-:61732584-61732869	11	-	61732585	61732869	chr11:-:61732584-61732840	FTH1	ENSG00000167996	ENST00000273550;ENST00000532829;ENST00000534180;ENST00000526640;ENST00000534719
chr11:-:61732915-61734783	11	-	61732916	61734783	chr11:-:61732987-61734783;chr11:-:61733049-61734783	FTH1	ENSG00000167996	ENST00000273550;ENST00000532829;ENST00000534180;ENST00000526640;ENST00000534719
chr11:-:62327299-62327540	11	-	62327300	62327540	chr11:-:62327309-62327540	EEF1G	ENSG00000254772	ENST00000329251
chr11:-:62339373-62341302	11	-	62339374	62341302	chr11:-:62339373-62340055;chr11:-:62340214-62341302	EEF1G	ENSG00000254772	ENST00000329251
chr11:-:65623713-65624036	11	-	65623714	65624036	chr11:-:65623713-65624355;chr11:-:65623713-65624401;chr11:-:65623713-65624563;chr11:-:65623713-65625102;chr11:-:65623713-65625567;chr11:-:65623713-65626701	CFL1	ENSG00000172757	ENST00000525451;ENST00000530945;ENST00000308162;ENST00000524553;ENST00000531413
chr11:+:66276785-66276881	11	+	66276786	66276881	out.of.scope	DPP3	ENSG00000254986	ENST00000541961
chr11:+:67351315-67351934	11	+	67351316	67351934	chr11:+:67351315-67351604;chr11:+:67351640-67351934	GSTP1	ENSG00000084207	ENST00000398606
chr11:+:67351315-67352155	11	+	67351316	67352155	chr11:+:67351315-67351604;chr11:+:67352041-67352155	GSTP1	ENSG00000084207	ENST00000398606
chr11:+:73571054-73574221	11	+	73571055	73574221	chr11:+:73571054-73574216	MRPL48	ENSG00000175581	ENST00000544819;ENST00000542303
chr11:+:75110621-75111487	11	+	75110622	75111487	chr11:+:75110621-75111737;chr11:+:75110621-75112683	RPS3	ENSG00000149273	ENST00000530721;ENST00000422465;ENST00000278572;ENST00000532872;ENST00000534440;ENST00000526608;ENST00000527273;ENST00000524851;ENST00000526248
chr12:-:112846142-112846382	12	-	112846143	112846382	chr12:-:112846142-112846223	RPL6	ENSG00000089009	ENST00000202773;ENST00000424576
chr12:-:120637288-120638885	12	-	120637289	120638885	chr12:-:120637288-120637848;chr12:-:120637288-120638521;chr12:-:120637288-120638532;chr12:-:120638634-120638885;chr12:-:120638694-120638885	RPLP0	ENSG00000089157	ENST00000392514;ENST00000313104;ENST00000546989;ENST00000228306;ENST00000549098;ENST00000551258
chr12:-:125397351-125397377	12	-	125397352	125397377	no.hit	UBC	ENSG00000150991	ENST00000538617;ENST00000339647
chr12:-:31451158-31478769	12	-	31451159	31478769	chr12:-:31451158-31457915;chr12:-:31451158-31476877;chr12:-:31451158-31478159;chr12:-:31451158-31478957	FAM60A	ENSG00000139146	ENST00000539409;ENST00000337682
chr12:-:53291402-53292462	12	-	53291403	53292462	chr12:-:53291402-53292244;chr12:-:53292303-53292462	KRT8	ENSG00000170421	ENST00000552551;ENST00000293308
chr12:-:53292303-53292456	12	-	53292304	53292456	chr12:-:53292303-53292462	KRT8	ENSG00000170421	ENST00000552551;ENST00000293308;ENST00000547031
chr12:-:57058282-57058542	12	-	57058283	57058542	chr12:-:57058282-57058559	PTGES3	ENSG00000110958	ENST00000262033;ENST00000414274
chr12:+:120934356-120935637	12	+	120934357	120935637	chr12:+:120934356-120935875;chr12:+:120934356-120935922	DYNLL1	ENSG00000088986	ENST00000242577;ENST00000392508
chr12:+:54676449-54677595	12	+	54676450	54677595	chr12:+:54676449-54676583;chr12:+:54676658-54677595;chr12:+:54677018-54677595	HNRNPA1	ENSG00000135486	ENST00000547566;ENST00000340913;ENST00000330752;ENST00000547276;ENST00000550482
chr12:+:54677012-54677610	12	+	54677013	54677610	chr12:+:54676380-54677610	HNRNPA1	ENSG00000135486	ENST00000547566;ENST00000340913;ENST00000330752;ENST00000547276;ENST00000550482
chr12:+:54677751-54678023	12	+	54677752	54678023	chr12:+:54677751-54678041	HNRNPA1	ENSG00000135486	ENST00000547566;ENST00000340913;ENST00000330752;ENST00000547276;ENST00000550482
chr12:+:54678101-54678720	12	+	54678102	54678720	chr12:+:54678101-54678332;chr12:+:54678101-54680445	HNRNPA1	ENSG00000135486	ENST00000547566;ENST00000340913;ENST00000547276
chr12:+:56365496-56366034	12	+	56365497	56366034	no.hit	CDK2	ENSG00000123374	ENST00000266970
chr12:+:56510443-56510537	12	+	56510444	56510537	chr12:+:56510443-56510558	RPL41	ENSG00000229117	ENST00000546591;ENST00000501597;ENST00000546485;ENST00000358888
chr12:+:56552199-56552467	12	+	56552200	56552467	chr12:+:56552188-56552467	MYL6	ENSG00000092841	ENST00000550697;ENST00000548580;ENST00000348108;ENST00000547649;ENST00000548725;ENST00000551589;ENST00000548400
chr12:+:56553514-56553808	12	+	56553515	56553808	chr12:+:56553406-56553808;chr12:+:56553514-56553758	MYL6	ENSG00000092841	ENST00000550697;ENST00000548580;ENST00000348108;ENST00000547649;ENST00000548725;ENST00000551589;ENST00000548400
chr12:+:57627687-57627794	12	+	57627688	57627794	chr12:+:57627687-57627785	SHMT2	ENSG00000182199	ENST00000556825;ENST00000557487;ENST00000557433
chr12:+:6644027-6645689	12	+	6644028	6645689	chr12:+:6644027-6645659	GAPDH	ENSG00000111640	ENST00000229239;ENST00000396856;ENST00000396859;ENST00000466525
chr13:-:45911523-45912796	13	-	45911524	45912796	chr13:-:45911523-45911601;chr13:-:45911523-45912794	TPT1	ENSG00000133112	ENST00000379056;ENST00000530705;ENST00000379060
chr13:-:45911538-45912794	13	-	45911539	45912794	chr13:-:45911523-45912794;chr13:-:45911688-45912794	TPT1	ENSG00000133112	ENST00000379056;ENST00000530705;ENST00000379060
chr13:-:45912932-45913631	13	-	45912933	45913631	chr13:-:45912911-45913631	TPT1	ENSG00000133112	ENST00000379056;ENST00000530705;ENST00000379060;ENST00000309246;ENST00000527226
chr13:-:45913681-45914128	13	-	45913682	45914128	chr13:-:45912911-45914128;chr13:-:45913737-45914128	TPT1	ENSG00000133112	ENST00000379056;ENST00000530705;ENST00000379060;ENST00000309246;ENST00000527226
chr13:-:45913737-45914152	13	-	45913738	45914152	chr13:-:45913737-45914128	TPT1	ENSG00000133112	ENST00000379056;ENST00000530705;ENST00000379060;ENST00000309246;ENST00000527226
chr13:+:27827980-27830320	13	+	27827981	27830320	chr13:+:27827980-27828356;chr13:+:27827980-27829378;chr13:+:27829486-27830320;chr13:+:27829491-27830320	RPL21	ENSG00000122026	ENST00000311549;ENST00000461690;ENST00000272274;ENST00000326092;ENST00000493317;ENST00000483765
chr13:+:27828398-27829378	13	+	27828399	27829378	chr13:+:27827980-27829378;chr13:+:27828418-27829378	RPL21	ENSG00000122026	ENST00000311549;ENST00000461690;ENST00000272274;ENST00000326092;ENST00000493317;ENST00000483765
chr13:+:27828418-27830320	13	+	27828419	27830320	chr13:+:27828418-27829378;chr13:+:27829486-27830320;chr13:+:27829491-27830320	RPL21	ENSG00000122026	ENST00000311549;ENST00000461690;ENST00000272274;ENST00000326092;ENST00000493317;ENST00000483765
chr14:-:50085844-50087279	14	-	50085845	50087279	chr14:-:50085858-50087279	RPL36AL	ENSG00000165502	ENST00000298289
chr14:+:55607081-55609312	14	+	55607082	55609312	chr14:+:55607081-55609301	LGALS3	ENSG00000131981	ENST00000254301;ENST00000553755;ENST00000556438
chr14:+:55609467-55611812	14	+	55609468	55611812	chr14:+:55609467-55610165;chr14:+:55609467-55611833	LGALS3	ENSG00000131981	ENST00000254301;ENST00000556438
chr15:+:44084553-44085172	15	+	44084554	44085172	chr15:+:44084581-44085172;chr15:+:44084776-44085172;chr15:+:44084809-44085172	SERF2	ENSG00000140264	ENST00000249786;ENST00000445816;ENST00000339624;ENST00000409617
chr15:+:45007899-45009804	15	+	45007900	45009804	chr15:+:45006746-45009804;chr15:+:45007899-45008526;chr15:+:45008554-45009804	B2M	ENSG00000166710	ENST00000558401;ENST00000559720;ENST00000561424;ENST00000349264;ENST00000557901;ENST00000559220;ENST00000561139
chr15:+:45008554-45009622	15	+	45008555	45009622	chr15:+:45008554-45009804	B2M	ENSG00000166710	ENST00000558401;ENST00000559720;ENST00000561424;ENST00000349264;ENST00000557901;ENST00000559220;ENST00000561139
chr15:+:69745359-69745672	15	+	69745360	69745672	chr15:+:69745359-69745985;chr15:+:69745359-69747508;chr15:+:69745359-69747766	RPLP1	ENSG00000137818	ENST00000260379;ENST00000357790
chr16:-:2012242-2012497	16	-	2012243	2012497	chr16:-:2012266-2012497;chr16:-:2012271-2012497	RPS2	ENSG00000140988	ENST00000343262;ENST00000526586;ENST00000533186;ENST00000533161;ENST00000529806
chr16:-:2904023-2906082	16	-	2904024	2906082	chr16:-:2904023-2904245;chr16:-:2904023-2905574;chr16:-:2904023-2906134;chr16:-:2905852-2906082	PRSS22	ENSG00000005001	ENST00000161006
chr16:-:88713195-88713508	16	-	88713196	88713508	chr16:-:88713246-88713508	CYBA	ENSG00000051523	ENST00000261623;ENST00000566229
chr16:+:85839470-85840365	16	+	85839471	85840365	chr16:+:85839470-85840061;chr16:+:85839470-85840343;chr16:+:85839470-85840432	COX4I1	ENSG00000131143	ENST00000253452
chr16:+:88925197-88926070	16	+	88925198	88926070	chr16:+:88925197-88925752;chr16:+:88925197-88925980;chr16:+:88925197-88926300;chr16:+:88925199-88926070	TRAPPC2L	ENSG00000167515	ENST00000567895;ENST00000567312;ENST00000568583
chr16:+:88926380-88927358	16	+	88926381	88927358	chr16:+:88926380-88927300;chr16:+:88926380-88927318;chr16:+:88926380-88927321	TRAPPC2L	ENSG00000167515	ENST00000567895;ENST00000567312;ENST00000568583
chr16:+:89627776-89628003	16	+	89627777	89628003	chr16:+:89627471-89628003;chr16:+:89627776-89627985	RPL13	ENSG00000167526	ENST00000491523;ENST00000484610;ENST00000563270;ENST00000567815;ENST00000562879;ENST00000565571;ENST00000393099
chr16:+:89627776-89628006	16	+	89627777	89628006	chr16:+:89627776-89627985	RPL13	ENSG00000167526	ENST00000491523;ENST00000484610;ENST00000563270;ENST00000567815;ENST00000562879;ENST00000565571;ENST00000393099
chr16:+:89704115-89704303	16	+	89704116	89704303	chr16:+:89704115-89704243	DPEP1	ENSG00000015413	ENST00000261615
chr17:-:37006467-37008856	17	-	37006468	37008856	chr17:-:37004310-37008856;chr17:-:37006467-37006614;chr17:-:37006728-37008856	RPL23	ENSG00000125691	ENST00000394332;ENST00000245857;ENST00000577407
chr17:-:37006716-37008856	17	-	37006717	37008856	chr17:-:37004310-37008856;chr17:-:37006728-37008856	RPL23	ENSG00000125691	ENST00000394332;ENST00000245857;ENST00000577407
chr17:-:41605585-41605858	17	-	41605586	41605858	no.hit	ETV4	ENSG00000175832	ENST00000393664
chr17:-:41613847-41622641	17	-	41613848	41622641	chr17:-:41613847-41621247;chr17:-:41613847-41622342;chr17:-:41622390-41622641	ETV4	ENSG00000175832	ENST00000393664
chr17:-:46692617-46694806	17	-	46692618	46694806	no.hit	HOXB7	ENSG00000260027	ENST00000567101
chr17:-:46694865-46694998	17	-	46694866	46694998	no.hit	HOXB7	ENSG00000260027	ENST00000567101
chr17:-:4849292-4851557	17	-	4849293	4851557	chr17:-:4849292-4849922;chr17:-:4850115-4851557	PFN1	ENSG00000108518	ENST00000225655
chr17:-:4850007-4851557	17	-	4850008	4851557	chr17:-:4850115-4851557	PFN1	ENSG00000108518	ENST00000225655
chr17:-:4850111-4851557	17	-	4850112	4851557	chr17:-:4850115-4851557	PFN1	ENSG00000108518	ENST00000225655
chr17:-:63553761-63553923	17	-	63553762	63553923	chr17:-:63545778-63553923	AXIN2	ENSG00000168646	ENST00000307078
chr17:-:73754427-73754529	17	-	73754428	73754529	chr17:-:73754453-73754529	GALK1	ENSG00000108479	ENST00000225614
chr17:-:8281010-8285460	17	-	8281011	8285460	chr17:-:8281010-8283113;chr17:-:8283254-8285460;chr17:-:8284021-8285460	RPL26	ENSG00000161970	ENST00000293842
chr17:-:8281962-8283113	17	-	8281963	8283113	chr17:-:8280996-8283113;chr17:-:8281010-8283113;chr17:-:8281042-8283113	RPL26	ENSG00000161970	ENST00000293842
chr17:+:16284429-16285360	17	+	16284430	16285360	no.hit	UBB	ENSG00000170315	ENST00000302182;ENST00000577640;ENST00000535788
chr17:+:16285296-16285725	17	+	16285297	16285725	no.hit	UBB	ENSG00000170315	ENST00000302182;ENST00000577640;ENST00000535788
chr17:+:16285461-16285638	17	+	16285462	16285638	no.hit	UBB	ENSG00000170315	ENST00000302182;ENST00000577640;ENST00000535788
chr17:+:37360440-37360784	17	+	37360441	37360784	chr17:+:37360440-37360777	RPL19	ENSG00000108298	ENST00000225430;ENST00000579374
chr17:+:41150488-41151949	17	+	41150489	41151949	chr17:+:41150488-41150765;chr17:+:41150848-41151949;chr17:+:41150929-41151949	RPL27	ENSG00000131469	ENST00000253788;ENST00000588830
chr17:+:4433177-4433926	17	+	4433178	4433926	chr17:+:4428488-4433926	SPNS2	ENSG00000183018	ENST00000329078
chr17:+:72199875-72200056	17	+	72199876	72200056	chr17:+:72199849-72200056;chr17:+:72199884-72200056;chr17:+:72199909-72200056	RPL38	ENSG00000172809	ENST00000439590;ENST00000311111;ENST00000584577;ENST00000533498
chr19:-:10943515-10943626	19	-	10943516	10943626	no.hit	TMED1	ENSG00000099203	ENST00000214869
chr19:-:1615479-1615684	19	-	1615480	1615684	chr19:-:1612429-1615684;chr19:-:1612432-1615684;chr19:-:1615484-1615684;chr19:-:1615514-1615684;chr19:-:1615519-1615684	TCF3	ENSG00000071564	ENST00000262965;ENST00000590684
chr19:-:282298-287473	19	-	282299	287473	chr19:-:282809-287473	PPAP2C	ENSG00000141934	ENST00000269812;ENST00000434325
chr19:-:39294535-39303070	19	-	39294536	39303070	chr19:-:39294535-39297100;chr19:-:39297235-39303070;chr19:-:39299588-39303070	LGALS4	ENSG00000171747	ENST00000307751;ENST00000597153
chr19:-:39297235-39303481	19	-	39297236	39303481	chr19:-:39297235-39299383;chr19:-:39297235-39303070;chr19:-:39303159-39303481	LGALS4	ENSG00000171747	ENST00000307751;ENST00000597153;ENST00000597803
chr19:-:39299482-39303070	19	-	39299483	39303070	chr19:-:39297235-39303070;chr19:-:39299588-39303070	LGALS4	ENSG00000171747	ENST00000307751;ENST00000597153;ENST00000597803
chr19:-:39303095-39303481	19	-	39303096	39303481	chr19:-:39303159-39303481	LGALS4	ENSG00000171747	ENST00000307751;ENST00000597153;ENST00000597803
chr19:-:39924058-39924304	19	-	39924059	39924304	chr19:-:39924058-39924133;chr19:-:39924058-39924157;chr19:-:39924058-39924161;chr19:-:39924209-39924304	RPS16	ENSG00000105193	ENST00000251453;ENST00000601655
chr19:-:39924185-39924304	19	-	39924186	39924304	chr19:-:39924209-39924304	RPS16	ENSG00000105193	ENST00000251453;ENST00000601655
chr19:-:39924401-39924939	19	-	39924402	39924939	chr19:-:39924401-39926246;chr19:-:39924401-39926297	RPS16	ENSG00000105193	ENST00000251453;ENST00000601655
chr19:-:51302105-51302550	19	-	51302106	51302550	chr19:-:51302181-51302550;chr19:-:51302215-51302550	C19orf48	ENSG00000167747	ENST00000345523;ENST00000391812
chr19:+:17970783-17972902	19	+	17970784	17972902	chr19:+:17970783-17972101;chr19:+:17972281-17972902	RPL18A	ENSG00000105640	ENST00000222247;ENST00000599898
chr19:+:17972281-17973726	19	+	17972282	17973726	chr19:+:17972281-17972902;chr19:+:17973032-17973726	RPL18A	ENSG00000105640	ENST00000222247;ENST00000599898
chr19:+:2269883-2271383	19	+	2269884	2271383	chr19:+:2269743-2271383;chr19:+:2270675-2271383	OAZ1	ENSG00000104904	ENST00000592787;ENST00000602676
chr19:+:35607263-35611981	19	+	35607264	35611981	chr19:+:35607263-35608160;chr19:+:35607263-35610071;chr19:+:35607263-35610266;chr19:+:35610320-35611981	FXYD3	ENSG00000089356	ENST00000604404;ENST00000603181;ENST00000604255;ENST00000346446;ENST00000605550;ENST00000604804
chr19:+:36139305-36145472	19	+	36139306	36145472	chr19:+:36139305-36142134;chr19:+:36142251-36145472	COX6B1	ENSG00000126267	ENST00000246554
chr19:+:42218998-42219568	19	+	42218999	42219568	chr19:+:42219168-42219568	CEACAM5	ENSG00000105388	ENST00000398599;ENST00000221992;ENST00000405816;ENST00000595113
chr19:+:42260867-42261968	19	+	42260868	42261968	chr19:+:42260867-42265156	CEACAM6	ENSG00000086548	ENST00000199764
chr19:+:42265435-42274706	19	+	42265436	42274706	chr19:+:42265435-42265876;chr19:+:42270207-42274706	CEACAM6	ENSG00000086548	ENST00000199764
chr19:+:42364671-42364844	19	+	42364672	42364844	chr19:+:42364359-42364844;chr19:+:42364515-42364844;chr19:+:42364564-42364844	RPS19	ENSG00000105372	ENST00000598742;ENST00000601492;ENST00000221975;ENST00000593863
chr19:+:42365281-42373109	19	+	42365282	42373109	chr19:+:42365281-42365548;chr19:+:42365281-42367940;chr19:+:42365281-42373100	RPS19	ENSG00000105372	ENST00000598742;ENST00000601492;ENST00000221975;ENST00000593863;ENST00000598261
chr19:+:42365281-42375418	19	+	42365282	42375418	chr19:+:42365281-42365548;chr19:+:42365281-42367940;chr19:+:42365281-42373100;chr19:+:42373823-42375418	RPS19	ENSG00000105372	ENST00000598742;ENST00000221975;ENST00000593863
chr19:+:42373823-42375425	19	+	42373824	42375425	chr19:+:42373823-42375418	RPS19	ENSG00000105372	ENST00000598742;ENST00000221975;ENST00000593863
chr19:+:46375535-46375659	19	+	46375536	46375659	no.hit	FOXA3	ENSG00000170608	ENST00000302177
chr19:+:49468739-49468820	19	+	49468740	49468820	no.hit	FTL	ENSG00000087086	ENST00000331825
chr19:+:49468866-49469537	19	+	49468867	49469537	chr19:+:49468866-49469026;chr19:+:49469173-49469537	FTL	ENSG00000087086	ENST00000331825
chr19:+:49704608-49705220	19	+	49704609	49705220	chr19:+:49704042-49705220	TRPM4	ENSG00000130529	ENST00000252826
chr19:+:49990895-49993106	19	+	49990896	49993106	chr19:+:49990901-49993106	RPL13A	ENSG00000142541	ENST00000391857;ENST00000472481;ENST00000477613;ENST00000467825
chr19:+:49993179-49993496	19	+	49993180	49993496	chr19:+:49993179-49993383;chr19:+:49993179-49993488	RPL13A	ENSG00000142541	ENST00000391857;ENST00000472481;ENST00000477613;ENST00000467825
chr19:+:49993554-49993736	19	+	49993555	49993736	chr19:+:49993554-49993731	RPL13A	ENSG00000142541	ENST00000391857;ENST00000472481;ENST00000477613;ENST00000467825
chr19:+:49994121-49994276	19	+	49994122	49994276	chr19:+:49994121-49994296	RPL13A	ENSG00000142541	ENST00000391857;ENST00000472481;ENST00000477613;ENST00000467825
chr19:+:49994121-49994329	19	+	49994122	49994329	chr19:+:49994121-49994296	RPL13A	ENSG00000142541	ENST00000391857;ENST00000472481;ENST00000477613;ENST00000467825
chr19:+:49994804-49995000	19	+	49994805	49995000	chr19:+:49994804-49994985	RPL13A	ENSG00000142541	ENST00000391857;ENST00000477613;ENST00000467825
chr19:+:49999728-49999892	19	+	49999729	49999892	chr19:+:49999728-50000429;chr19:+:49999728-50000450	RPS11	ENSG00000142534	ENST00000600027;ENST00000270625;ENST00000602252
chr19:+:49999728-50000776	19	+	49999729	50000776	chr19:+:49999728-50000429;chr19:+:49999728-50000450;chr19:+:50000582-50000776	RPS11	ENSG00000142534	ENST00000600027;ENST00000270625;ENST00000602252
chr19:+:50000011-50000450	19	+	50000012	50000450	chr19:+:49999728-50000450;chr19:+:49999754-50000450	RPS11	ENSG00000142534	ENST00000600027;ENST00000270625;ENST00000602252
chr19:+:50000064-50000450	19	+	50000065	50000450	chr19:+:49999728-50000450;chr19:+:49999754-50000450	RPS11	ENSG00000142534	ENST00000600027;ENST00000270625;ENST00000602252
chr19:+:50000539-50000776	19	+	50000540	50000776	chr19:+:50000539-50000837;chr19:+:50000582-50000776	RPS11	ENSG00000142534	ENST00000600027;ENST00000270625;ENST00000602252
chr19:+:50000819-50001173	19	+	50000820	50001173	chr19:+:50000852-50001173	RPS11	ENSG00000142534	ENST00000600027;ENST00000270625;ENST00000602252
chr19:+:50000819-50002768	19	+	50000820	50002768	chr19:+:50001303-50002768	RPS11	ENSG00000142534	ENST00000600027;ENST00000270625;ENST00000602252
chr19:+:50709436-50713619	19	+	50709437	50713619	chr19:+:50706928-50713619	MYH14	ENSG00000105357	ENST00000425460
chr19:+:54710330-54710479	19	+	54710331	54710479	chr19:+:54710330-54710420;chr19:+:54710330-54711265	RPS9	ENSG00000170889	ENST00000302907;ENST00000436445;ENST00000391751;ENST00000391753
chr19:+:54710330-54711238	19	+	54710331	54711238	chr19:+:54710330-54710420;chr19:+:54710330-54711265	RPS9	ENSG00000170889	ENST00000302907;ENST00000436445;ENST00000391751;ENST00000391753
chr19:+:54710330-54711278	19	+	54710331	54711278	chr19:+:54710330-54710420;chr19:+:54710330-54711265	RPS9	ENSG00000170889	ENST00000302907;ENST00000436445;ENST00000391751;ENST00000391753
chr19:+:55898061-55899302	19	+	55898062	55899302	chr19:+:55898061-55898134;chr19:+:55898061-55898652;chr19:+:55898061-55899297	RPL28	ENSG00000108107	ENST00000558815;ENST00000559463;ENST00000558131
chr19:+:5690345-5690516	19	+	5690346	5690516	chr19:+:5690338-5690516;chr19:+:5690400-5690516	RPL36	ENSG00000130255	ENST00000579649;ENST00000347512;ENST00000579446;ENST00000394580
chr19:+:5691468-5691542	19	+	5691469	5691542	chr19:+:5691464-5691542	RPL36	ENSG00000130255	ENST00000579649;ENST00000347512;ENST00000579446;ENST00000394580
chr19:+:580782-581362	19	+	580783	581362	chr19:+:580782-581314	BSG	ENSG00000172270	ENST00000353555
chr19:+:8386458-8386539	19	+	8386459	8386539	chr19:+:8386453-8386539	RPS28	ENSG00000233927	ENST00000600659
chr19:+:8386979-8387155	19	+	8386980	8387155	chr19:+:8386975-8387155	RPS28	ENSG00000233927	ENST00000600659;ENST00000417088
chr2:-:136602251-136603806	2	-	136602252	136603806	chr2:-:136602254-136603806	MCM6	ENSG00000076003	ENST00000264156
chr2:-:176043863-176044825	2	-	176043864	176044825	chr2:-:176043978-176044825	ATP5G3	ENSG00000154518	ENST00000409194;ENST00000392541;ENST00000497075
chr2:-:219129089-219129237	2	-	219129090	219129237	no.hit	AAMP	ENSG00000127837	ENST00000248450;ENST00000444053;ENST00000422731
chr2:-:88422623-88425694	2	-	88422624	88425694	chr2:-:88422623-88424012;chr2:-:88424105-88425694	FABP1	ENSG00000163586	ENST00000295834
chr2:-:88424127-88425694	2	-	88424128	88425694	chr2:-:88424105-88425694	FABP1	ENSG00000163586	ENST00000295834
chr2:+:232576693-232577513	2	+	232576694	232577513	chr2:+:232576693-232577152;chr2:+:232576693-232577161;chr2:+:232577226-232577513	PTMA	ENSG00000187514	ENST00000409115;ENST00000341369
chr2:+:232576697-232577157	2	+	232576698	232577157	no.hit	PTMA	ENSG00000187514	ENST00000409115;ENST00000341369
chr2:+:232577226-232577498	2	+	232577227	232577498	chr2:+:232577226-232577513	PTMA	ENSG00000187514	ENST00000409115;ENST00000341369
chr2:+:241555928-241556207	2	+	241555929	241556207	chr2:+:241555928-241556392;chr2:+:241555928-241556506;chr2:+:241555928-241556620	GPR35	ENSG00000178623	ENST00000319838
chr2:+:242512227-242512268	2	+	242512228	242512268	no.hit	BOK	ENSG00000176720	ENST00000318407
chr2:+:47602438-47612304	2	+	47602439	47612304	chr2:+:47602438-47604152;chr2:+:47607108-47612304	EPCAM	ENSG00000119888	ENST00000405271;ENST00000263735;ENST00000490733
chr2:+:47607108-47612315	2	+	47607109	47612315	chr2:+:47607108-47612304	EPCAM	ENSG00000119888	ENST00000405271;ENST00000263735;ENST00000490733
chr2:+:55462098-55462545	2	+	55462099	55462545	chr2:+:55462098-55462563	RPS27A	ENSG00000143947	ENST00000402285;ENST00000272317;ENST00000404735
chr2:+:55462098-55462548	2	+	55462099	55462548	chr2:+:55462098-55462563	RPS27A	ENSG00000143947	ENST00000402285;ENST00000272317;ENST00000404735
chr2:+:85132842-85133094	2	+	85132843	85133094	chr2:+:85132842-85133126	TMSB10	ENSG00000034510	ENST00000233143
chr2:+:85133241-85133394	2	+	85133242	85133394	chr2:+:85133241-85133512	TMSB10	ENSG00000034510	ENST00000233143
chr2:+:85133241-85133478	2	+	85133242	85133478	chr2:+:85133241-85133512	TMSB10	ENSG00000034510	ENST00000233143
chr2:+:85133241-85133489	2	+	85133242	85133489	chr2:+:85133241-85133512	TMSB10	ENSG00000034510	ENST00000233143
chr2:+:85133241-85133523	2	+	85133242	85133523	chr2:+:85133241-85133512	TMSB10	ENSG00000034510	ENST00000233143
chr2:+:86363685-86364107	2	+	86363686	86364107	chr2:+:86363685-86364104	PTCD3	ENSG00000132300	ENST00000254630
chr20:-:17639679-17639979	20	-	17639680	17639979	no.hit	RRBP1	ENSG00000125844	ENST00000377813;ENST00000246043;ENST00000455029
chr20:-:17639679-17640249	20	-	17639680	17640249	no.hit	RRBP1	ENSG00000125844	ENST00000377813;ENST00000246043;ENST00000455029
chr20:-:17639703-17639762	20	-	17639704	17639762	no.hit	RRBP1	ENSG00000125844	ENST00000377813;ENST00000246043;ENST00000455029
chr20:-:33867461-33867744	20	-	33867462	33867744	chr20:-:33867550-33867744	EIF6	ENSG00000242372	ENST00000374436;ENST00000447927;ENST00000374450
chr20:+:1099292-1099395	20	+	1099293	1099395	chr20:+:1094052-1099395	PSMF1	ENSG00000125818	ENST00000333082;ENST00000479715;ENST00000246015;ENST00000478004
chr20:+:48568674-48569106	20	+	48568675	48569106	no.hit	RNF114	ENSG00000124226	ENST00000244061
chr20:+:60962970-60963512	20	+	60962971	60963512	chr20:+:60962970-60963364;chr20:+:60963420-60963512	RPS21	ENSG00000171858	ENST00000343986;ENST00000492356;ENST00000370562;ENST00000450116
chr20:+:60963425-60963512	20	+	60963426	60963512	chr20:+:60963420-60963512	RPS21	ENSG00000171858	ENST00000343986;ENST00000492356;ENST00000370562;ENST00000450116
chr21:-:43732656-43733594	21	-	43732657	43733594	chr21:-:43732379-43733594	TFF3	ENSG00000160180	ENST00000518498;ENST00000291525;ENST00000489676
chr21:-:43733717-43735402	21	-	43733718	43735402	chr21:-:43733741-43735402;chr21:-:43733785-43735402	TFF3	ENSG00000160180	ENST00000518498;ENST00000291525
chr21:-:43733741-43735404	21	-	43733742	43735404	chr21:-:43733741-43735402	TFF3	ENSG00000160180	ENST00000518498;ENST00000291525
chr21:-:43733741-43735416	21	-	43733742	43735416	chr21:-:43733741-43735402	TFF3	ENSG00000160180	ENST00000518498;ENST00000291525
chr22:+:37964369-37964411	22	+	37964370	37964411	no.hit	CDC42EP1	ENSG00000128283	ENST00000249014
chr3:-:101400059-101404661	3	-	101400060	101404661	chr3:-:101400059-101401272;chr3:-:101400059-101401614;chr3:-:101401751-101404661	RPL24	ENSG00000114391	ENST00000464595;ENST00000394077;ENST00000495401
chr3:-:122084313-122087022	3	-	122084314	122087022	chr3:-:122081874-122087022;chr3:-:122084313-122084411	CCDC58	ENSG00000160124	ENST00000291458
chr3:-:12881741-12882268	3	-	12881742	12882268	chr3:-:12881741-12882133;chr3:-:12881741-12882992	RPL32	ENSG00000144713	ENST00000429711;ENST00000273223;ENST00000435983;ENST00000457131;ENST00000452606
chr3:-:12882455-12882992	3	-	12882456	12882992	chr3:-:12881741-12882992;chr3:-:12881840-12882992;chr3:-:12881852-12882992	RPL32	ENSG00000144713	ENST00000429711;ENST00000273223;ENST00000435983;ENST00000457131;ENST00000452606
chr3:-:52028142-52029101	3	-	52028143	52029101	chr3:-:52028142-52028788;chr3:-:52028142-52029057	RPL29	ENSG00000162244	ENST00000294189;ENST00000475248
chr3:+:184290639-184290760	3	+	184290640	184290760	no.hit	EPHB3	ENSG00000182580	ENST00000330394
chr3:+:39449312-39450096	3	+	39449313	39450096	chr3:+:39449277-39450096	RPSA	ENSG00000168028	ENST00000301821;ENST00000458478;ENST00000443003
chr3:+:39452490-39453255	3	+	39452491	39453255	chr3:+:39452490-39453139	RPSA	ENSG00000168028	ENST00000301821;ENST00000458478;ENST00000443003
chr3:+:39452490-39453386	3	+	39452491	39453386	chr3:+:39452490-39453139;chr3:+:39453268-39453386	RPSA	ENSG00000168028	ENST00000301821;ENST00000458478;ENST00000443003
chr3:+:48482038-48485261	3	+	48482039	48485261	chr3:+:48482038-48485255	TMA7	ENSG00000232112	ENST00000438607
chr3:+:51737889-51738056	3	+	51737890	51738056	no.hit	TEX264	ENSG00000164081	ENST00000341333
chr4:-:39456599-39458025	4	-	39456600	39458025	chr4:-:39456549-39458025;chr4:-:39456564-39458025	RPL9	ENSG00000163682	ENST00000295955;ENST00000449470;ENST00000504470
chr4:-:57897502-57899360	4	-	57897503	57899360	chr4:-:57897502-57898591;chr4:-:57898718-57899360	IGFBP7	ENSG00000163453	ENST00000512512;ENST00000295666
chr4:+:109542101-109543106	4	+	109542102	109543106	chr4:+:109541756-109543106;chr4:+:109541868-109543106;chr4:+:109542852-109543106	RPL34	ENSG00000109475	ENST00000394667;ENST00000394665;ENST00000394668
chr4:+:109542297-109543106	4	+	109542298	109543106	chr4:+:109541756-109543106;chr4:+:109541868-109543106;chr4:+:109542852-109543106	RPL34	ENSG00000109475	ENST00000394667;ENST00000394665;ENST00000394668
chr4:+:152024231-152025623	4	+	152024232	152025623	chr4:+:152024231-152025328;chr4:+:152024231-152025336;chr4:+:152025438-152025623	RPS3A	ENSG00000145425	ENST00000274065;ENST00000509736
chr5:-:147207691-147211085	5	-	147207692	147211085	chr5:-:147207691-147209161;chr5:-:147209193-147211085	SPINK1	ENSG00000164266	ENST00000296695
chr5:-:149826526-149829265	5	-	149826527	149829265	chr5:-:149826526-149827147;chr5:-:149827298-149829265	RPS14	ENSG00000164587	ENST00000401695;ENST00000407193
chr5:-:40834367-40834574	5	-	40834368	40834574	chr5:-:40834367-40834572	RPL37	ENSG00000145592	ENST00000509877;ENST00000507642;ENST00000504562;ENST00000508493
chr5:-:81572337-81573513	5	-	81572338	81573513	chr5:-:81572337-81573511	RPS23	ENSG00000186468	ENST00000296674;ENST00000512493;ENST00000507980;ENST00000504293
chr5:-:81573666-81574138	5	-	81573667	81574138	chr5:-:81573671-81574138	RPS23	ENSG00000186468	ENST00000296674;ENST00000512493;ENST00000507980
chr5:+:135382704-135385127	5	+	135382705	135385127	chr5:+:135382704-135382962;chr5:+:135383109-135385127;chr5:+:135384038-135385127	TGFBI	ENSG00000120708	ENST00000442011
chr5:+:151183557-151183966	5	+	151183558	151183966	no.hit	G3BP1	ENSG00000145907	ENST00000394123;ENST00000356245
chr5:+:170819982-170832305	5	+	170819983	170832305	chr5:+:170819982-170827156;chr5:+:170827214-170832305;chr5:+:170827929-170832305	NPM1	ENSG00000181163	ENST00000517671;ENST00000351986;ENST00000393820
chr5:+:85915316-85916484	5	+	85915317	85916484	chr5:+:85915259-85916484;chr5:+:85915313-85916484;chr5:+:85915695-85916484	COX7C	ENSG00000127184	ENST00000247655;ENST00000511472;ENST00000515763
chr6:-:150141839-150157220	6	-	150141840	150157220	chr6:-:150141839-150147399;chr6:-:150147495-150157220	LRP11	ENSG00000120256	ENST00000239367
chr6:-:31322102-31322255	6	-	31322103	31322255	chr6:-:31322073-31322255	HLA-B	ENSG00000234745	ENST00000481849;ENST00000497377;ENST00000412585
chr6:-:31322326-31322409	6	-	31322327	31322409	chr6:-:31322303-31322409	HLA-B	ENSG00000234745	ENST00000481849;ENST00000497377;ENST00000412585
chr6:-:34392608-34392848	6	-	34392609	34392848	chr6:-:34392617-34392848	RPS10	ENSG00000124614	ENST00000326199
chr6:-:34392632-34392848	6	-	34392633	34392848	chr6:-:34392617-34392848	RPS10	ENSG00000124614	ENST00000326199
chr6:-:34392947-34393808	6	-	34392948	34393808	chr6:-:34392998-34393808	RPS10	ENSG00000124614	ENST00000326199
chr6:-:44222798-44222912	6	-	44222799	44222912	no.hit	SLC35B2	ENSG00000157593	ENST00000393812
chr6:-:52129287-52129421	6	-	52129288	52129421	no.hit	MCM3	ENSG00000112118	ENST00000229854
chr6:-:74228258-74228420	6	-	74228259	74228420	chr6:-:74228333-74228420	EEF1A1	ENSG00000156508	ENST00000309268;ENST00000490569;ENST00000331523
chr6:-:74228951-74229605	6	-	74228952	74229605	chr6:-:74228951-74229059;chr6:-:74229239-74229605	EEF1A1	ENSG00000156508	ENST00000309268;ENST00000490569;ENST00000331523;ENST00000495333
chr6:-:75950981-75953138	6	-	75950982	75953138	chr6:-:75950981-75951537;chr6:-:75950981-75953432	COX7A2	ENSG00000112695	ENST00000370089;ENST00000459637;ENST00000509698;ENST00000460985;ENST00000472311
chr6:-:75953254-75953432	6	-	75953255	75953432	chr6:-:75950101-75953432;chr6:-:75950981-75953432;chr6:-:75951654-75953432	COX7A2	ENSG00000112695	ENST00000370089;ENST00000459637;ENST00000509698;ENST00000460985;ENST00000472311
chr6:+:133135921-133136154	6	+	133135922	133136154	chr6:+:133135921-133136110	RPS12	ENSG00000112306	ENST00000230050;ENST00000484616
chr6:+:133135921-133136156	6	+	133135922	133136156	chr6:+:133135921-133136110	RPS12	ENSG00000112306	ENST00000230050;ENST00000484616
chr6:+:133136227-133138618	6	+	133136228	133138618	chr6:+:133136227-133137599;chr6:+:133138200-133138618	RPS12	ENSG00000112306	ENST00000230050;ENST00000484616
chr6:+:29911320-29912276	6	+	29911321	29912276	chr6:+:29911320-29911898;chr6:+:29912174-29912276	HLA-A	ENSG00000206503	ENST00000376809;ENST00000496081
chr6:+:29912174-29912242	6	+	29912175	29912242	chr6:+:29912174-29912276;chr6:+:29912174-29913227	HLA-A	ENSG00000206503	ENST00000376809;ENST00000496081
chr6:+:30459430-30460317	6	+	30459431	30460317	chr6:+:30459430-30460180;chr6:+:30460213-30460317	HLA-E	ENSG00000204592	ENST00000376630
chr6:+:33239899-33243573	6	+	33239900	33243573	chr6:+:33239899-33240363;chr6:+:33239899-33240404;chr6:+:33240503-33243573;chr6:+:33243434-33243573	RPS18	ENSG00000231500	ENST00000439602;ENST00000474973;ENST00000474626;ENST00000496813
chr6:+:33240434-33243618	6	+	33240435	33243618	no.hit	RPS18	ENSG00000231500	ENST00000439602;ENST00000474973;ENST00000474626;ENST00000496813
chr6:+:33240503-33243741	6	+	33240504	33243741	chr6:+:33240503-33243276;chr6:+:33240503-33243573;chr6:+:33243660-33243741	RPS18	ENSG00000231500	ENST00000439602;ENST00000474973;ENST00000474626;ENST00000496813
chr6:+:33243660-33243717	6	+	33243661	33243717	chr6:+:33243660-33243741	RPS18	ENSG00000231500	ENST00000439602;ENST00000474973;ENST00000474626;ENST00000496813
chr6:+:33243843-33244167	6	+	33243844	33244167	chr6:+:33243843-33243952;chr6:+:33244044-33244167	RPS18	ENSG00000231500	ENST00000439602;ENST00000474973;ENST00000474626;ENST00000496813
chr6:+:33374652-33377254	6	+	33374653	33377254	chr6:+:33374652-33377422	KIFC1	ENSG00000237649	ENST00000428849
chr6:+:34211299-34212613	6	+	34211300	34212613	no.hit	HMGA1	ENSG00000137309	ENST00000347617;ENST00000401473;ENST00000311487
chr6:+:35437306-35438024	6	+	35437307	35438024	chr6:+:35437306-35437955	RPL10A	ENSG00000198755	ENST00000322203;ENST00000467020;ENST00000478340
chr6:+:43487923-43488053	6	+	43487924	43488053	chr6:+:43487923-43488012	POLR1C	ENSG00000171453	ENST00000372389
chr7:-:140154208-140154261	7	-	140154209	140154261	no.hit	MKRN1	ENSG00000133606	ENST00000255977
chr7:-:148700296-148700328	7	-	148700297	148700328	no.hit	PDIA4	ENSG00000155660	ENST00000286091
chr7:-:33055482-33057083	7	-	33055483	33057083	chr7:-:33055482-33057050	NT5C3A	ENSG00000122643	ENST00000610140
chr7:-:35058208-35076708	7	-	35058209	35076708	chr7:-:35058208-35077429	DPY19L1	ENSG00000173852	ENST00000310974
chr7:-:56170704-56174056	7	-	56170705	56174056	chr7:-:56170704-56171918;chr7:-:56172168-56174056	CHCHD2	ENSG00000106153	ENST00000395422
chr7:-:73151021-73151398	7	-	73151022	73151398	chr7:-:73151021-73151258;chr7:-:73151021-73151891	ABHD11	ENSG00000106077	ENST00000222800
chr7:+:100210225-100210352	7	+	100210226	100210352	out.of.scope	MOSPD3	ENSG00000106330	ENST00000393950
chr7:+:44839079-44840885	7	+	44839080	44840885	chr7:+:44839079-44839300;chr7:+:44839473-44840885;chr7:+:44840142-44840885	PPIA	ENSG00000196262	ENST00000468812;ENST00000489459;ENST00000355968
chr7:+:44839479-44840885	7	+	44839480	44840885	chr7:+:44839473-44840885;chr7:+:44840142-44840885	PPIA	ENSG00000196262	ENST00000468812;ENST00000489459;ENST00000355968
chr7:+:75932393-75933123	7	+	75932394	75933123	chr7:+:75932393-75933118	HSPB1	ENSG00000106211	ENST00000248553
chr8:-:101724685-101725314	8	-	101724686	101725314	chr8:-:101724685-101724879;chr8:-:101725017-101725314	PABPC1	ENSG00000070756	ENST00000318607;ENST00000519004;ENST00000522387;ENST00000519596;ENST00000519100
chr8:-:146015811-146016661	8	-	146015812	146016661	chr8:-:146015855-146016661;chr8:-:146016148-146016661	RPL8	ENSG00000161016	ENST00000531975;ENST00000529163;ENST00000526668;ENST00000394920;ENST00000262584;ENST00000533397;ENST00000532702
chr8:-:74204631-74204923	8	-	74204632	74204923	chr8:-:74204640-74204923	RPL7	ENSG00000147604	ENST00000352983;ENST00000396466
chr8:-:99057627-99057739	8	-	99057628	99057739	chr8:-:99057627-99057735	RPL30	ENSG00000156482	ENST00000521291;ENST00000396070;ENST00000518850;ENST00000287038;ENST00000517489
chr8:+:145583386-145583831	8	+	145583387	145583831	chr8:+:145583407-145583831	SLC52A2	ENSG00000185803	ENST00000530047;ENST00000532887
chr8:+:55060104-55060202	8	+	55060105	55060202	no.hit	MRPL15	ENSG00000137547	ENST00000260102
chr9:-:113007123-113018691	9	-	113007124	113018691	chr9:-:113007123-113013099;chr9:-:113007123-113013637;chr9:-:113013742-113018691	TXN	ENSG00000136810	ENST00000374517
chr9:-:130211656-130211888	9	-	130211657	130211888	chr9:-:130211641-130211888	RPL12	ENSG00000197958	ENST00000361436;ENST00000497825
chr9:-:130211800-130211888	9	-	130211801	130211888	chr9:-:130211641-130211888	RPL12	ENSG00000197958	ENST00000361436;ENST00000497825
chr9:-:130211987-130213559	9	-	130211988	130213559	chr9:-:130211987-130213009;chr9:-:130213083-130213559	RPL12	ENSG00000197958	ENST00000361436;ENST00000497825
chr9:-:130213083-130213563	9	-	130213084	130213563	chr9:-:130213083-130213328;chr9:-:130213083-130213559	RPL12	ENSG00000197958	ENST00000361436;ENST00000497825
chr9:-:19376383-19376491	9	-	19376384	19376491	chr9:-:19376386-19376491	RPS6	ENSG00000137154	ENST00000380394;ENST00000315377
chr9:-:19378916-19379460	9	-	19378917	19379460	chr9:-:19378916-19379484	RPS6	ENSG00000137154	ENST00000380394;ENST00000315377
chr9:-:19379597-19380187	9	-	19379598	19380187	chr9:-:19379616-19380187	RPS6	ENSG00000137154	ENST00000380394;ENST00000315377
chr9:+:130911761-130911861	9	+	130911762	130911861	no.hit	LCN2	ENSG00000148346	ENST00000277480
chr9:+:130911942-130912522	9	+	130911943	130912522	chr9:+:130911942-130912516;chr9:+:130911942-130912653	LCN2	ENSG00000148346	ENST00000277480
chr9:+:130913271-130913916	9	+	130913272	130913916	chr9:+:130912653-130913916;chr9:+:130912835-130913916	LCN2	ENSG00000148346	ENST00000277480
chr9:+:130913402-130913916	9	+	130913403	130913916	chr9:+:130912653-130913916;chr9:+:130912835-130913916	LCN2	ENSG00000148346	ENST00000277480
chr9:+:130914563-130915346	9	+	130914564	130915346	chr9:+:130914563-130915378	LCN2	ENSG00000148346	ENST00000277480;ENST00000494317
chr9:+:130914563-130915383	9	+	130914564	130915383	chr9:+:130914563-130915378	LCN2	ENSG00000148346	ENST00000277480;ENST00000494317
chr9:+:136217174-136217427	9	+	136217175	136217427	chr9:+:136217174-136217451	RPL7A	ENSG00000148303	ENST00000323345;ENST00000463740
chrX:-:108926604-108976367	X	-	108926605	108976367	chrX:-:108926604-108935264;chrX:-:108926781-108976367;chrX:-:108926895-108976367;chrX:-:108939425-108976367	ACSL4	ENSG00000068366	ENST00000348502
chrX:-:71493258-71493650	X	-	71493259	71493650	chrX:-:71493239-71493650	RPS4X	ENSG00000198034	ENST00000316084
chrX:-:71493717-71494902	X	-	71493718	71494902	chrX:-:71493822-71494902;chrX:-:71494285-71494902	RPS4X	ENSG00000198034	ENST00000316084
chrX:-:71495024-71495393	X	-	71495025	71495393	chrX:-:71495000-71495393	RPS4X	ENSG00000198034	ENST00000316084;ENST00000373626
chrX:+:100646034-100646482	X	+	100646035	100646482	chrX:+:100646034-100646446	RPL36A	ENSG00000241343	ENST00000553110;ENST00000392994
chrX:+:100646333-100646446	X	+	100646334	100646446	chrX:+:100646034-100646446;chrX:+:100646223-100646446	RPL36A	ENSG00000241343	ENST00000553110;ENST00000392994
chrX:+:100646810-100650715	X	+	100646811	100650715	chrX:+:100646810-100647037;chrX:+:100646810-100650322;chrX:+:100650445-100650715	RPL36A	ENSG00000241343	ENST00000553110;ENST00000392994
chrX:+:118603686-118604058	X	+	118603687	118604058	no.hit	SLC25A5	ENSG00000005022	ENST00000317881
chrX:+:12993287-12993725	X	+	12993288	12993725	chrX:+:12993287-12994364	TMSB4X	ENSG00000205542	ENST00000451311;ENST00000380636
chrX:+:12994480-12994906	X	+	12994481	12994906	chrX:+:12994480-12994895	TMSB4X	ENSG00000205542	ENST00000451311;ENST00000380636
chrX:+:153627737-153627835	X	+	153627738	153627835	chrX:+:153627737-153627827	RPL10	ENSG00000147403	ENST00000369817;ENST00000436473;ENST00000491035;ENST00000458500;ENST00000485196;ENST00000467168;ENST00000406022
chrX:+:153627737-153628143	X	+	153627738	153628143	chrX:+:153627737-153627827;chrX:+:153627935-153628143	RPL10	ENSG00000147403	ENST00000369817;ENST00000436473;ENST00000491035;ENST00000458500;ENST00000485196;ENST00000467168;ENST00000406022

## Sheet: GBM
junc.id	chr	strand	int.start	int.end	canonical	symbol	ensg	enst
chr1:-:109822778-109823398	1	-	109822779	109823398	chr1:-:109822778-109823017;chr1:-:109823111-109823398	PSRC1	ENSG00000134222	ENST00000369904;ENST00000369907;ENST00000369909;ENST00000409138
chr1:-:109823873-109825139	1	-	109823874	109825139	chr1:-:109823873-109824240;chr1:-:109824682-109825139	PSRC1	ENSG00000134222	ENST00000369904;ENST00000369907;ENST00000369909;ENST00000409138
chr1:-:112031489-112032088	1	-	112031490	112032088	chr1:-:112031489-112033277;chr1:-:112031646-112032088	ADORA3	ENSG00000121933	ENST00000442484
chr1:-:112031646-112032323	1	-	112031647	112032323	chr1:-:112031646-112032088;chr1:-:112031646-112032248;chr1:-:112031646-112033277	ADORA3	ENSG00000121933	ENST00000442484
chr1:-:1190864-1191424	1	-	1190865	1191424	chr1:-:1190867-1191424	UBE2J2	ENSG00000160087	ENST00000349431;ENST00000400929
chr1:-:151958636-151966227	1	-	151958637	151966227	chr1:-:151958727-151966227	S100A10	ENSG00000197747	ENST00000368811;ENST00000478348
chr1:-:152005293-152006123	1	-	152005294	152006123	chr1:-:152005299-152006123	S100A11	ENSG00000163191	ENST00000271638
chr1:-:156640144-156640255	1	-	156640145	156640255	no.hit	NES	ENSG00000132688	ENST00000368223
chr1:-:156640645-156640681	1	-	156640646	156640681	no.hit	NES	ENSG00000132688	ENST00000368223
chr1:-:156642031-156643245	1	-	156642032	156643245	chr1:-:156642997-156643245	NES	ENSG00000132688	ENST00000368223
chr1:-:1684493-1685005	1	-	1684494	1685005	chr1:-:1684499-1685005	NADK	ENSG00000008130	ENST00000341991
chr1:-:202304186-202304769	1	-	202304187	202304769	chr1:-:202304186-202304773	UBE2T	ENSG00000077152	ENST00000367274
chr1:-:203148553-203148674	1	-	203148554	203148674	no.hit	CHI3L1	ENSG00000133048	ENST00000473185;ENST00000255409;ENST00000404436;ENST00000478742
chr1:-:203149678-203149754	1	-	203149679	203149754	no.hit	CHI3L1	ENSG00000133048	ENST00000473185;ENST00000255409;ENST00000404436;ENST00000472064
chr1:-:203152889-203153703	1	-	203152890	203153703	chr1:-:203152919-203153703	CHI3L1	ENSG00000133048	ENST00000255409
chr1:-:205740776-205741623	1	-	205740777	205741623	chr1:-:205740776-205743960;chr1:-:205740781-205741623	RAB7L1	ENSG00000117280	ENST00000367139
chr1:-:212548642-212553236	1	-	212548643	212553236	chr1:-:212548642-212550135;chr1:-:212548642-212550903;chr1:-:212551048-212553236	TMEM206	ENSG00000065600	ENST00000535273
chr1:-:212912028-212939530	1	-	212912029	212939530	chr1:-:212912028-212912875;chr1:-:212912028-212955713;chr1:-:212912028-212957704;chr1:-:212912943-212939530	NSL1	ENSG00000117697	ENST00000366977
chr1:-:225702602-225706899	1	-	225702603	225706899	chr1:-:225702602-225704897;chr1:-:225705008-225706899;chr1:-:225705692-225706899	ENAH	ENSG00000154380	ENST00000366843
chr1:-:24130981-24134624	1	-	24130982	24134624	chr1:-:24131015-24134624;chr1:-:24133775-24134624	HMGCL	ENSG00000117305	ENST00000374490
chr1:-:32256557-32256580	1	-	32256558	32256580	no.hit	SPOCD1	ENSG00000134668	ENST00000452755
chr1:-:32258368-32259347	1	-	32258369	32259347	chr1:-:32258368-32258878;chr1:-:32259029-32259347	SPOCD1	ENSG00000134668	ENST00000452755
chr1:-:37351135-37356520	1	-	37351136	37356520	chr1:-:37346492-37356520	GRIK3	ENSG00000163873	ENST00000373091
chr1:-:3808343-3809446	1	-	3808344	3809446	chr1:-:3807621-3809446	C1orf174	ENSG00000198912	ENST00000361605
chr1:-:38463231-38463359	1	-	38463232	38463359	chr1:-:38463231-38463355	FHL3	ENSG00000183386	ENST00000373016
chr1:-:44476554-44482126	1	-	44476555	44482126	chr1:-:44476554-44477232;chr1:-:44476554-44482065;chr1:-:44476554-44482718;chr1:-:44476554-44489919	SLC6A9	ENSG00000196517	ENST00000372310
chr1:-:62921125-62923208	1	-	62921126	62923208	chr1:-:62921127-62923208	DOCK7	ENSG00000116641	ENST00000454575
chr1:-:68243190-68297501	1	-	68243191	68297501	chr1:-:68243190-68299026	GNG12	ENSG00000172380	ENST00000370982
chr1:+:11805894-11807516	1	+	11805895	11807516	chr1:+:11805894-11805986;chr1:+:11805894-11806044;chr1:+:11805894-11806183;chr1:+:11805894-11807496;chr1:+:11805894-11808471	AGTRAP	ENSG00000177674	ENST00000314340
chr1:+:13910595-13912087	1	+	13910596	13912087	chr1:+:13910595-13922321;chr1:+:13910595-13933667	PDPN	ENSG00000162493	ENST00000376057
chr1:+:13912209-13917457	1	+	13912210	13917457	no.hit	PDPN	ENSG00000162493	ENST00000376057;ENST00000475043
chr1:+:13912209-13933667	1	+	13912210	13933667	chr1:+:13910595-13933667;chr1:+:13910683-13933667;chr1:+:13910836-13933667;chr1:+:13912063-13933667;chr1:+:13912134-13933667;chr1:+:13922479-13933667	PDPN	ENSG00000162493	ENST00000376057;ENST00000475043
chr1:+:149754746-149755555	1	+	149754747	149755555	chr1:+:149754746-149755558	FCGR1A	ENSG00000150337	ENST00000444948;ENST00000369168
chr1:+:151129198-151131168	1	+	151129199	151131168	chr1:+:151129198-151131141;chr1:+:151129198-151138946	TNFAIP8L2;SCNM1	ENSG00000163154;ENSG00000163156	ENST00000368910;ENST00000602841
chr1:+:155679615-155695172	1	+	155679616	155695172	chr1:+:155679615-155686796;chr1:+:155679615-155691307;chr1:+:155686919-155695172;chr1:+:155691409-155695172	DAP3	ENSG00000132676	ENST00000368336;ENST00000343043;ENST00000421487
chr1:+:156616898-156618604	1	+	156616899	156618604	no.hit	BCAN	ENSG00000132692	ENST00000329117;ENST00000361588
chr1:+:158990319-159002319	1	+	158990320	159002319	chr1:+:158990319-159002313	IFI16	ENSG00000163565	ENST00000368132;ENST00000295809
chr1:+:159023493-159024610	1	+	159023494	159024610	chr1:+:159023514-159024610	IFI16	ENSG00000163565	ENST00000368132;ENST00000295809;ENST00000562225
chr1:+:167741725-167742474	1	+	167741726	167742474	chr1:+:167741725-167742472	MPZL1	ENSG00000197965	ENST00000392121;ENST00000367853
chr1:+:20396958-20397981	1	+	20396959	20397981	chr1:+:20396958-20397337;chr1:+:20396958-20403253;chr1:+:20396958-20411313	PLA2G5	ENSG00000127472	ENST00000375108
chr1:+:20398128-20411313	1	+	20398129	20411313	chr1:+:20396958-20411313;chr1:+:20397437-20411313;chr1:+:20403391-20411313	PLA2G5	ENSG00000127472	ENST00000375108
chr1:+:20403307-20411313	1	+	20403308	20411313	chr1:+:20396958-20411313;chr1:+:20397437-20411313;chr1:+:20403391-20411313	PLA2G5	ENSG00000127472	ENST00000375108
chr1:+:218607790-218609426	1	+	218607791	218609426	chr1:+:218607790-218609311	TGFB2	ENSG00000092969	ENST00000479322
chr1:+:224544745-224553580	1	+	224544746	224553580	chr1:+:224544770-224553580;chr1:+:224545314-224553580;chr1:+:224548265-224553580;chr1:+:224552157-224553580	CNIH4	ENSG00000143771	ENST00000366860;ENST00000366856
chr1:+:224553693-224559031	1	+	224553694	224559031	chr1:+:224553693-224558984;chr1:+:224553693-224563496;chr1:+:224553693-224566770	CNIH4	ENSG00000143771	ENST00000366860;ENST00000366856
chr1:+:22986073-22986118	1	+	22986074	22986118	no.hit	C1QB	ENSG00000173369	ENST00000314933
chr1:+:22987412-22987448	1	+	22987413	22987448	no.hit	C1QB	ENSG00000173369	ENST00000314933
chr1:+:23384058-23385568	1	+	23384059	23385568	chr1:+:23384058-23385565	KDM1A	ENSG00000004487	ENST00000356634
chr1:+:32797843-32798304	1	+	32797844	32798304	chr1:+:32797843-32798301	HDAC1	ENSG00000116478	ENST00000373548
chr1:+:33138502-33139083	1	+	33138503	33139083	chr1:+:33138502-33139059;chr1:+:33138502-33145235;chr1:+:33138502-33145240;chr1:+:33138502-33146126	RBBP4	ENSG00000162521	ENST00000373493;ENST00000492348;ENST00000458695
chr1:+:38023349-38027681	1	+	38023350	38027681	chr1:+:38023349-38024927;chr1:+:38023349-38027157;chr1:+:38027336-38027681	DNALI1	ENSG00000163879	ENST00000296218
chr1:+:38261518-38265515	1	+	38261519	38265515	chr1:+:38261518-38262415;chr1:+:38261518-38265238;chr1:+:38262492-38265515	MANEAL	ENSG00000185090	ENST00000329006
chr1:+:86048307-86048425	1	+	86048308	86048425	chr1:+:86048307-86048422	CYR61	ENSG00000142871	ENST00000451137
chr1:+:989931-990756	1	+	989932	990756	chr1:+:989931-990203	AGRN	ENSG00000188157	ENST00000379370
chr10:-:97424057-97442407	10	-	97424058	97442407	chr10:-:97424057-97440228;chr10:-:97440366-97442407	TCTN3	ENSG00000119977	ENST00000371217
chr10:-:97442937-97443278	10	-	97442938	97443278	chr10:-:97442952-97443278	TCTN3	ENSG00000119977	ENST00000371217
chr11:-:124519692-124521710	11	-	124519693	124521710	chr11:-:124519692-124524550	SIAE	ENSG00000110013	ENST00000545756
chr11:-:124971199-124972532	11	-	124971200	124972532	chr11:-:124971199-124971339;chr11:-:124971199-124972027;chr11:-:124971199-124972629;chr11:-:124972213-124972532;chr11:-:124972247-124972532	TMEM218	ENSG00000150433	ENST00000531262
chr11:-:59423213-59423971	11	-	59423214	59423971	chr11:-:59423213-59423428;chr11:-:59423518-59423971	PATL1	ENSG00000166889	ENST00000300146
chr11:-:59940602-59943036	11	-	59940603	59943036	chr11:-:59940602-59942874;chr11:-:59940602-59942978	MS4A6A	ENSG00000110077	ENST00000528851;ENST00000531914;ENST00000412309
chr11:-:63993341-63993533	11	-	63993342	63993533	chr11:-:63993341-63993521;chr11:-:63993341-63993662	TRPT1	ENSG00000149743	ENST00000394547;ENST00000317459
chr11:-:65623497-65623659	11	-	65623498	65623659	no.hit	CFL1	ENSG00000172757	ENST00000525451;ENST00000530945;ENST00000308162;ENST00000531413
chr11:-:65637702-65638006	11	-	65637703	65638006	chr11:-:65637708-65638006	EFEMP2	ENSG00000172638	ENST00000531972;ENST00000307998
chr11:-:66205730-66206252	11	-	66205731	66206252	chr11:-:66205730-66206102;chr11:-:66205730-66206180	MRPL11	ENSG00000174547	ENST00000534488;ENST00000329819
chr11:-:67207723-67207805	11	-	67207724	67207805	chr11:-:67207734-67207805	CORO1B	ENSG00000172725	ENST00000393893;ENST00000341356
chr11:-:77812241-77815401	11	-	77812242	77815401	chr11:-:77812241-77813919;chr11:-:77812241-77814432;chr11:-:77812241-77815025;chr11:-:77812241-77820487;chr11:-:77815098-77815401	ALG8	ENSG00000159063	ENST00000299626
chr11:+:30344749-30354412	11	+	30344750	30354412	chr11:+:30344749-30352432;chr11:+:30352921-30354412;chr11:+:30353347-30354412	ARL14EP	ENSG00000152219	ENST00000282032
chr11:+:35641463-35641923	11	+	35641464	35641923	chr11:+:35641609-35641923	FJX1	ENSG00000179431	ENST00000317811
chr11:+:61135470-61136071	11	+	61135471	61136071	chr11:+:61135470-61135723;chr11:+:61135470-61136068;chr11:+:61135470-61136243	TMEM138	ENSG00000149483	ENST00000543833
chr11:+:68350597-68355445	11	+	68350598	68355445	chr11:+:68343511-68355445;chr11:+:68350597-68355265;chr11:+:68350597-68355394;chr11:+:68350597-68355412	PPP6R3	ENSG00000110075	ENST00000393800
chr11:+:70208594-70218317	11	+	70208595	70218317	chr11:+:70208594-70211478;chr11:+:70208594-70218320;chr11:+:70212073-70218317	PPFIA1	ENSG00000131626	ENST00000253925
chr11:+:71941512-71941842	11	+	71941513	71941842	chr11:+:71941512-71941839	INPPL1	ENSG00000165458	ENST00000298229;ENST00000538751
chr11:+:74904327-74904486	11	+	74904328	74904486	no.hit	SLCO2B1	ENSG00000137491	ENST00000289575;ENST00000454962
chr11:+:838367-838553	11	+	838368	838553	chr11:+:838367-838444	CD151	ENSG00000177697	ENST00000322008;ENST00000397421;ENST00000530726
chr11:+:843045-847200	11	+	843046	847200	chr11:+:842915-847200;chr11:+:843050-847200;chr11:+:843669-847200;chr11:+:844186-847200;chr11:+:844587-847200	TSPAN4	ENSG00000214063	ENST00000397397
chr12:-:109530742-109531154	12	-	109530743	109531154	chr12:-:109530592-109531154;chr12:-:109530742-109531051	ALKBH2	ENSG00000189046	ENST00000343075;ENST00000429722
chr12:-:2973921-2975558	12	-	2973922	2975558	chr12:-:2973918-2975558;chr12:-:2973921-2974520;chr12:-:2974565-2975558	FOXM1	ENSG00000111206	ENST00000361953
chr12:-:2981410-2983142	12	-	2981411	2983142	chr12:-:2977920-2983142;chr12:-:2981413-2983142	FOXM1	ENSG00000111206	ENST00000361953
chr12:-:54577743-54580676	12	-	54577744	54580676	chr12:-:54577743-54580630;chr12:-:54577743-54581602;chr12:-:54577743-54582298;chr12:-:54577743-54582734	SMUG1	ENSG00000123415	ENST00000337581
chr12:-:56092701-56094682	12	-	56092702	56094682	chr12:-:56092701-56093294;chr12:-:56092701-56093653;chr12:-:56092701-56094045;chr12:-:56093773-56094682;chr12:-:56094177-56094682	ITGA7	ENSG00000135424	ENST00000257879
chr12:-:56119665-56119919	12	-	56119666	56119919	no.hit	CD63	ENSG00000135404	ENST00000548117;ENST00000420846;ENST00000546939;ENST00000552692;ENST00000549117;ENST00000257857;ENST00000550050;ENST00000552164
chr12:-:56216257-56216355	12	-	56216258	56216355	chr12:-:56216259-56216355	DNAJC14	ENSG00000135392	ENST00000317269
chr12:-:56308150-56309226	12	-	56308151	56309226	chr12:-:56308150-56320859	WIBG	ENSG00000170473	ENST00000398213
chr12:-:58144548-58144708	12	-	58144549	58144708	chr12:-:58144548-58144705	CDK4	ENSG00000135446	ENST00000257904;ENST00000547281
chr12:-:6439868-6440018	12	-	6439869	6440018	chr12:-:6439877-6440018	TNFRSF1A	ENSG00000067182	ENST00000162749;ENST00000537842
chr12:-:7632506-7633756	12	-	7632507	7633756	chr12:-:7632509-7633756;chr12:-:7632592-7633756	CD163	ENSG00000177575	ENST00000537626;ENST00000541972
chr12:+:111884837-111884925	12	+	111884838	111884925	chr12:+:111884837-111884928	SH2B3	ENSG00000111252	ENST00000341259
chr12:+:7175072-7175759	12	+	7175073	7175759	chr12:+:7175075-7175759	C1S	ENSG00000182326	ENST00000328916;ENST00000360817;ENST00000402681;ENST00000443875
chr13:-:110801775-110802678	13	-	110801776	110802678	no.hit	COL4A1	ENSG00000187498	ENST00000375820
chr13:-:110817253-110817310	13	-	110817254	110817310	no.hit	COL4A1	ENSG00000187498	ENST00000375820
chr13:-:110826869-110826965	13	-	110826870	110826965	no.hit	COL4A1	ENSG00000187498	ENST00000375820
chr13:+:24242221-24247510	13	+	24242222	24247510	chr13:+:24242221-24242830;chr13:+:24243236-24247510	TNFRSF19	ENSG00000127863	ENST00000382263
chr14:-:26936135-26941525	14	-	26936136	26941525	chr14:-:26918169-26941525;chr14:-:26939696-26941525	NOVA1	ENSG00000139910	ENST00000539517
chr14:-:26939693-26941525	14	-	26939694	26941525	chr14:-:26918169-26941525;chr14:-:26939696-26941525	NOVA1	ENSG00000139910	ENST00000539517;ENST00000344429
chr14:-:92340019-92343830	14	-	92340020	92343830	chr14:-:92336729-92343830	FBLN5	ENSG00000140092	ENST00000267620
chr14:+:21552209-21552915	14	+	21552210	21552915	chr14:+:21552209-21552911	ARHGEF40	ENSG00000165801	ENST00000298694
chr14:+:23344674-23345897	14	+	23344675	23345897	chr14:+:23345581-23345897	LRP10	ENSG00000197324	ENST00000359591;ENST00000546834
chr14:+:24633343-24633956	14	+	24633344	24633956	chr14:+:24633343-24633795;chr14:+:24633343-24633822;chr14:+:24633343-24635055	IRF9	ENSG00000213928	ENST00000396864
chr14:+:24633343-24634046	14	+	24633344	24634046	chr14:+:24633343-24633795;chr14:+:24633343-24633822;chr14:+:24633343-24635055	IRF9	ENSG00000213928	ENST00000396864
chr14:+:63749934-63750988	14	+	63749935	63750988	chr14:+:63749934-63757595	RHOJ	ENSG00000126785	ENST00000316754
chr14:+:63749934-63754905	14	+	63749935	63754905	chr14:+:63749934-63757595	RHOJ	ENSG00000126785	ENST00000316754
chr14:+:95081114-95081254	14	+	95081115	95081254	no.hit	SERPINA3	ENSG00000196136	ENST00000393078;ENST00000393080
chr14:+:95081200-95081233	14	+	95081201	95081233	no.hit	SERPINA3	ENSG00000196136	ENST00000393078;ENST00000393080
chr15:-:23021429-23026021	15	-	23021430	23026021	chr15:-:23021429-23027800;chr15:-:23021429-23033277;chr15:-:23021429-23033893;chr15:-:23021429-23034146	NIPA2	ENSG00000140157	ENST00000398013
chr15:-:75891022-75891598	15	-	75891023	75891598	chr15:-:75891022-75892977;chr15:-:75891022-75893478	SNUPN	ENSG00000169371	ENST00000308588
chr15:-:85200773-85201226	15	-	85200774	85201226	chr15:-:85200579-85201226	NMB	ENSG00000197696	ENST00000360476;ENST00000394588
chr15:+:57543621-57545462	15	+	57543622	57545462	chr15:+:57543621-57544618;chr15:+:57543621-57545459	TCF12	ENSG00000140262	ENST00000267811;ENST00000343827
chr15:+:91157720-91161117	15	+	91157721	91161117	chr15:+:91157720-91161114;chr15:+:91157720-91162972	CRTC3	ENSG00000140577	ENST00000420329
chr15:+:99666824-99666926	15	+	99666825	99666926	chr15:+:99653920-99666926	SYNM	ENSG00000182253	ENST00000560674
chr16:-:30904068-30904532	16	-	30904069	30904532	chr16:-:30904035-30904532;chr16:-:30904068-30904160;chr16:-:30904269-30904532	BCL7C	ENSG00000099385	ENST00000572628;ENST00000215115
chr16:-:4511960-4516153	16	-	4511961	4516153	chr16:-:4511960-4513420;chr16:-:4511960-4513642;chr16:-:4511960-4513660;chr16:-:4511960-4513678;chr16:-:4513851-4516153	NMRAL1	ENSG00000153406	ENST00000404295;ENST00000574425
chr16:-:69152428-69155338	16	-	69152429	69155338	chr16:-:69152428-69154009;chr16:-:69152428-69154955;chr16:-:69154552-69155338;chr16:-:69155073-69155338	CHTF8	ENSG00000168802	ENST00000448552;ENST00000306585
chr16:-:732874-733321	16	-	732875	733321	chr16:-:732874-732952;chr16:-:732874-732957;chr16:-:732874-733166;chr16:-:733234-733321	JMJD8	ENSG00000161999	ENST00000609261
chr16:-:75574554-75576452	16	-	75574555	75576452	chr16:-:75575353-75576452	TMEM231	ENSG00000205084	ENST00000562410
chr16:-:75574554-75576499	16	-	75574555	75576499	chr16:-:75575353-75576499	TMEM231	ENSG00000205084	ENST00000562410
chr16:+:19179983-19184076	16	+	19179984	19184076	chr16:+:19179983-19184081;chr16:+:19179983-19184765	SYT17	ENSG00000103528	ENST00000355377
chr16:+:28847806-28848071	16	+	28847807	28848071	chr16:+:28847443-28848071;chr16:+:28847497-28848071;chr16:+:28847806-28848048;chr16:+:28847806-28848068;chr16:+:28847806-28848170	ATXN2L	ENSG00000168488	ENST00000336783;ENST00000566946
chr16:+:30007938-30012078	16	+	30007939	30012078	chr16:+:30007938-30008128;chr16:+:30008181-30012078	INO80E	ENSG00000169592	ENST00000567254
chr16:+:67100701-67116118	16	+	67100702	67116118	chr16:+:67100701-67116115	CBFB	ENSG00000067955	ENST00000290858;ENST00000412916
chr17:-:19288022-19288503	17	-	19288023	19288503	chr17:-:19288022-19288411	MFAP4	ENSG00000166482	ENST00000299610
chr17:-:39966086-39966931	17	-	39966087	39966931	chr17:-:39963131-39966931;chr17:-:39966086-39967114	LEPREL4	ENSG00000141696	ENST00000393928
chr17:-:42983740-42983860	17	-	42983741	42983860	no.hit	GFAP	ENSG00000131095	ENST00000253408
chr17:-:5388533-5389388	17	-	5388534	5389388	chr17:-:5388536-5389388	DERL2	ENSG00000072849	ENST00000571476
chr17:-:73754427-73754529	17	-	73754428	73754529	chr17:-:73754453-73754529	GALK1	ENSG00000108479	ENST00000225614
chr17:-:73872177-73872342	17	-	73872178	73872342	chr17:-:73872180-73872342	TRIM47	ENSG00000132481	ENST00000254816;ENST00000587339
chr17:-:76968278-76968305	17	-	76968279	76968305	no.hit	LGALS3BP	ENSG00000108679	ENST00000591778;ENST00000262776;ENST00000586720
chr17:-:79846152-79846190	17	-	79846153	79846190	no.hit	ALYREF	ENSG00000183684	ENST00000505490
chr17:-:79893020-79893212	17	-	79893021	79893212	chr17:-:79893020-79893998;chr17:-:79893023-79893212	PYCR1	ENSG00000183010	ENST00000329875
chr17:-:80401650-80402322	17	-	80401651	80402322	chr17:-:80401381-80402322;chr17:-:80401502-80402322;chr17:-:80401698-80402322;chr17:-:80402000-80402322	C17orf62	ENSG00000178927	ENST00000306645
chr17:-:8079339-8079517	17	-	8079340	8079517	chr17:-:8077590-8079517;chr17:-:8079344-8079517	TMEM107	ENSG00000179029	ENST00000449985
chr17:+:21092168-21094260	17	+	21092169	21094260	chr17:+:21087776-21094260;chr17:+:21092176-21094260	DHRS7B	ENSG00000109016	ENST00000579303
chr17:+:26646391-26652533	17	+	26646392	26652533	chr17:+:26646391-26652528;chr17:+:26646391-26653559	TMEM97	ENSG00000109084	ENST00000226230
chr17:+:27074965-27075054	17	+	27074966	27075054	chr17:+:27074965-27075034	TRAF4	ENSG00000076604	ENST00000262395
chr17:+:27075441-27075530	17	+	27075442	27075530	chr17:+:27075441-27075528	TRAF4	ENSG00000076604	ENST00000262395
chr17:+:39974530-39974639	17	+	39974531	39974639	chr17:+:39974530-39974633	FKBP10	ENSG00000141756	ENST00000321562
chr17:+:39974779-39975467	17	+	39974780	39975467	chr17:+:39974779-39975461	FKBP10	ENSG00000141756	ENST00000321562
chr17:+:39975651-39975821	17	+	39975652	39975821	chr17:+:39975651-39975781	FKBP10	ENSG00000141756	ENST00000321562
chr17:+:39976713-39976958	17	+	39976714	39976958	chr17:+:39976713-39977198	FKBP10	ENSG00000141756	ENST00000321562
chr17:+:39978069-39978492	17	+	39978070	39978492	chr17:+:39978069-39978474	FKBP10	ENSG00000141756	ENST00000321562
chr17:+:39978069-39978534	17	+	39978070	39978534	chr17:+:39978069-39978474	FKBP10	ENSG00000141756	ENST00000321562
chr17:+:5323611-5324617	17	+	5323612	5324617	chr17:+:5323611-5324615	RPAIN	ENSG00000129197	ENST00000381209
chr17:+:5977390-5983690	17	+	5977391	5983690	chr17:+:5973972-5983690;chr17:+:5974491-5983690;chr17:+:5981396-5983690;chr17:+:5983612-5983690	WSCD1	ENSG00000179314	ENST00000317744
chr17:+:60768122-60768312	17	+	60768123	60768312	chr17:+:60768122-60768309	MRC2	ENSG00000011028	ENST00000303375;ENST00000583597
chr17:+:60769499-60769600	17	+	60769500	60769600	chr17:+:60769499-60769591	MRC2	ENSG00000011028	ENST00000303375;ENST00000583597
chr17:+:60769499-60769685	17	+	60769500	60769685	chr17:+:60769499-60769591	MRC2	ENSG00000011028	ENST00000303375;ENST00000583597
chr17:+:60769499-60769692	17	+	60769500	60769692	chr17:+:60769499-60769591	MRC2	ENSG00000011028	ENST00000303375;ENST00000583597
chr17:+:7485012-7485153	17	+	7485013	7485153	no.hit	CD68	ENSG00000129226	ENST00000250092;ENST00000380498
chr17:+:8925187-8925627	17	+	8925188	8925627	chr17:+:8924902-8925627	NTN1	ENSG00000065320	ENST00000173229
chr19:-:12769327-12772073	19	-	12769328	12772073	chr19:-:12769158-12772073;chr19:-:12769321-12772073;chr19:-:12769324-12772073	MAN2B1	ENSG00000104774	ENST00000456935
chr19:-:39436683-39437111	19	-	39436684	39437111	chr19:-:39435744-39437111	FBXO17	ENSG00000269190	ENST00000292852
chr19:-:42526208-42546703	19	-	42526209	42546703	chr19:-:42526208-42526392;chr19:-:42526506-42546703	GRIK5	ENSG00000105737	ENST00000262895
chr19:-:49355580-49356938	19	-	49355581	49356938	chr19:-:49355583-49356938	PLEKHA4	ENSG00000105559	ENST00000263265
chr19:-:50413141-50432673	19	-	50413142	50432673	chr19:-:50413141-50414361;chr19:-:50413141-50416155;chr19:-:50413141-50420864;chr19:-:50413141-50421764;chr19:-:50413141-50430950;chr19:-:50413141-50432582;chr19:-:50413141-50432606;chr19:-:50421878-50432673;chr19:-:50431072-50432673	NUP62	ENSG00000213024	ENST00000422090
chr19:-:6712575-6713199	19	-	6712576	6713199	chr19:-:6712613-6713199;chr19:-:6712634-6713199	C3	ENSG00000125730	ENST00000245907
chr19:-:8028691-8038608	19	-	8028692	8038608	chr19:-:8028691-8032448;chr19:-:8028691-8038442;chr19:-:8032674-8038608;chr19:-:8038509-8038608	ELAVL1	ENSG00000066044	ENST00000351593
chr19:-:8032584-8038608	19	-	8032585	8038608	chr19:-:8032674-8038608;chr19:-:8038509-8038608	ELAVL1	ENSG00000066044	ENST00000351593
chr19:+:1032457-1032561	19	+	1032458	1032561	chr19:+:1032457-1032557	CNN2	ENSG00000064666	ENST00000263097
chr19:+:18286189-18286414	19	+	18286190	18286414	chr19:+:18286195-18286414	IFI30	ENSG00000216490	ENST00000407280
chr19:+:18288574-18288664	19	+	18288575	18288664	chr19:+:18288574-18288658	IFI30	ENSG00000216490	ENST00000407280
chr19:+:35646514-35648328	19	+	35646515	35648328	chr19:+:35646514-35647746;chr19:+:35646514-35648323	FXYD5	ENSG00000089327	ENST00000392219
chr19:+:41086842-41092679	19	+	41086843	41092679	chr19:+:41086842-41088256;chr19:+:41086842-41088331;chr19:+:41089623-41092679;chr19:+:41091723-41092679	SHKBP1	ENSG00000160410	ENST00000291842
chr19:+:49464163-49464788	19	+	49464164	49464788	chr19:+:49464171-49464788	BAX	ENSG00000087088	ENST00000345358;ENST00000513545;ENST00000506183;ENST00000293288
chr19:+:7593607-7593706	19	+	7593608	7593706	chr19:+:7593589-7593706	MCOLN1	ENSG00000090674	ENST00000264079
chr2:-:10581847-10581942	2	-	10581848	10581942	chr2:-:10581849-10581942	ODC1	ENSG00000115758	ENST00000234111;ENST00000405333
chr2:-:106710613-106715171	2	-	106710614	106715171	chr2:-:106710613-106713173;chr2:-:106713277-106715171	UXS1	ENSG00000115652	ENST00000283148;ENST00000409501
chr2:-:10826178-10829921	2	-	10826179	10829921	chr2:-:10822195-10829921;chr2:-:10824738-10829921	NOL10	ENSG00000115761	ENST00000381685
chr2:-:128608259-128615601	2	-	128608260	128615601	chr2:-:128605759-128615601;chr2:-:128608259-128610498;chr2:-:128610679-128615601	POLR2D	ENSG00000144231	ENST00000272645
chr2:-:190440046-190442944	2	-	190440047	190442944	chr2:-:190440046-190443080;chr2:-:190440046-190444538	SLC40A1	ENSG00000138449	ENST00000261024
chr2:-:209108325-209110042	2	-	209108326	209110042	chr2:-:209108328-209110042	IDH1	ENSG00000138413	ENST00000345146
chr2:-:216235150-216236631	2	-	216235151	216236631	chr2:-:216232750-216236631;chr2:-:216235155-216236631	FN1	ENSG00000115414	ENST00000446046;ENST00000432072;ENST00000456923;ENST00000461974
chr2:-:216236738-216236835	2	-	216236739	216236835	chr2:-:216236738-216236831;chr2:-:216236738-216238044	FN1	ENSG00000115414	ENST00000446046;ENST00000432072;ENST00000456923;ENST00000461974
chr2:-:217538397-217541482	2	-	217538398	217541482	no.hit	IGFBP5	ENSG00000115461	ENST00000233813
chr2:-:235404480-235404622	2	-	235404481	235404622	chr2:-:235404480-235404655	ARL4C	ENSG00000188042	ENST00000390645;ENST00000339728
chr2:-:242617992-242619643	2	-	242617993	242619643	chr2:-:242618064-242619643	DTYMK	ENSG00000168393	ENST00000305784
chr2:-:242625288-242626068	2	-	242625289	242626068	chr2:-:242625292-242626068	DTYMK	ENSG00000168393	ENST00000305784
chr2:-:29075365-29092444	2	-	29075366	29092444	chr2:-:29075365-29083983;chr2:-:29087985-29092444	TRMT61B	ENSG00000171103	ENST00000306108
chr2:-:46815265-46819613	2	-	46815266	46819613	chr2:-:46808730-46819613;chr2:-:46815318-46819613;chr2:-:46819064-46819613	PIGF	ENSG00000151665	ENST00000281382
chr2:-:46840924-46844108	2	-	46840925	46844108	chr2:-:46840924-46842075;chr2:-:46842324-46844108	PIGF	ENSG00000151665	ENST00000281382
chr2:-:65559185-65571852	2	-	65559186	65571852	chr2:-:65559185-65561248;chr2:-:65559185-65561738;chr2:-:65561907-65571852;chr2:-:65571728-65571852	SPRED2	ENSG00000198369	ENST00000356388
chr2:+:118583958-118586996	2	+	118583959	118586996	chr2:+:118583958-118586524	DDX18	ENSG00000088205	ENST00000263239
chr2:+:119988610-119996938	2	+	119988611	119996938	chr2:+:119981464-119996938;chr2:+:119988610-120003064	STEAP3	ENSG00000115107	ENST00000393106
chr2:+:12858703-12880451	2	+	12858704	12880451	chr2:+:12858703-12863385;chr2:+:12863678-12880451	TRIB2	ENSG00000071575	ENST00000155926;ENST00000381465
chr2:+:138724956-138727734	2	+	138724957	138727734	chr2:+:138722198-138727734;chr2:+:138724956-138725080;chr2:+:138725211-138727734	HNMT	ENSG00000150540	ENST00000410115;ENST00000280097
chr2:+:153577100-153591559	2	+	153577101	153591559	chr2:+:153577100-153589044;chr2:+:153577100-153591507	ARL6IP6	ENSG00000177917	ENST00000495469
chr2:+:172779627-172782046	2	+	172779628	172782046	chr2:+:172779017-172782046;chr2:+:172781437-172782046	HAT1	ENSG00000128708	ENST00000264108
chr2:+:173354341-173355751	2	+	173354342	173355751	chr2:+:173352956-173355751;chr2:+:173354386-173355751	ITGA6	ENSG00000091409	ENST00000409080
chr2:+:183597269-183605025	2	+	183597270	183605025	chr2:+:183595834-183605025;chr2:+:183597269-183600975;chr2:+:183601113-183605025;chr2:+:183604436-183605025	DNAJC10	ENSG00000077232	ENST00000418559
chr2:+:217525360-217525395	2	+	217525361	217525395	no.hit	IGFBP2	ENSG00000115457	ENST00000233809;ENST00000456764
chr2:+:231313865-231325976	2	+	231313866	231325976	chr2:+:231313865-231314028;chr2:+:231313865-231314275;chr2:+:231314970-231325976	SP100	ENSG00000067066	ENST00000409341
chr2:+:27307876-27308545	2	+	27307877	27308545	chr2:+:27307876-27308027;chr2:+:27308165-27308545	EMILIN1	ENSG00000138080	ENST00000380320
chr2:+:27308165-27308557	2	+	27308166	27308557	chr2:+:27308165-27308545	EMILIN1	ENSG00000138080	ENST00000380320
chr2:+:27865386-27870706	2	+	27865387	27870706	chr2:+:27865386-27870702	GPN1	ENSG00000198522	ENST00000610189
chr2:+:29006844-29022064	2	+	29006845	29022064	chr2:+:29006844-29011523;chr2:+:29016863-29022064	PPP1CB	ENSG00000213639	ENST00000358506;ENST00000296122;ENST00000395366
chr2:+:74438993-74439096	2	+	74438994	74439096	chr2:+:74438993-74441205	MTHFD2	ENSG00000065911	ENST00000409804;ENST00000470592
chr2:+:9614776-9616127	2	+	9614777	9616127	chr2:+:9614776-9616115;chr2:+:9614776-9618350;chr2:+:9614776-9618382	IAH1	ENSG00000134330	ENST00000482918;ENST00000497473
chr20:-:10622534-10623135	20	-	10622535	10623135	chr20:-:10622540-10623135	JAG1	ENSG00000101384	ENST00000254958
chr20:-:2776062-2776466	20	-	2776063	2776466	chr20:-:2776062-2776244	CPXM1	ENSG00000088882	ENST00000380605
chr20:-:33324562-33334610	20	-	33324563	33334610	chr20:-:33324562-33328166;chr20:-:33331145-33334610	NCOA6	ENSG00000198646	ENST00000359003
chr20:-:33342638-33345022	20	-	33342639	33345022	chr20:-:33342671-33345022	NCOA6	ENSG00000198646	ENST00000359003
chr20:-:33703736-33711692	20	-	33703737	33711692	chr20:-:33703736-33706400;chr20:-:33706522-33711692	EDEM2	ENSG00000088298	ENST00000374492
chr20:-:33714178-33725682	20	-	33714179	33725682	chr20:-:33714178-33719444;chr20:-:33722752-33725682	EDEM2	ENSG00000088298	ENST00000374492
chr20:-:33714178-33730175	20	-	33714179	33730175	chr20:-:33714178-33719444;chr20:-:33719586-33730175;chr20:-:33725808-33730175	EDEM2	ENSG00000088298	ENST00000374492
chr20:-:34219085-34219189	20	-	34219086	34219189	chr20:-:34219095-34219189	CPNE1	ENSG00000214078	ENST00000397443
chr20:-:43881788-43882215	20	-	43881789	43882215	chr20:-:43881792-43882215	SLPI	ENSG00000124107	ENST00000338380
chr20:-:46294700-46295003	20	-	46294701	46295003	chr20:-:46294697-46295003	SULF2	ENSG00000196562	ENST00000484875
chr20:+:18526677-18529345	20	+	18526678	18529345	chr20:+:18526677-18529252	SEC23B	ENSG00000101310	ENST00000336714;ENST00000377475;ENST00000422877
chr20:+:30135495-30136182	20	+	30135496	30136182	chr20:+:30135409-30136182;chr20:+:30135495-30136479	HM13	ENSG00000101294	ENST00000340852
chr20:+:30135495-30137866	20	+	30135496	30137866	chr20:+:30132838-30137866;chr20:+:30135495-30136479;chr20:+:30136917-30137866;chr20:+:30137135-30137866	HM13	ENSG00000101294	ENST00000340852
chr20:+:30327424-30345209	20	+	30327425	30345209	chr20:+:30327424-30330343;chr20:+:30330450-30345209	TPX2	ENSG00000088325	ENST00000300403
chr20:+:30385318-30386188	20	+	30385319	30386188	chr20:+:30385318-30386167	TPX2	ENSG00000088325	ENST00000300403
chr20:+:34389527-34411179	20	+	34389528	34411179	chr20:+:34389527-34430494	PHF20	ENSG00000025293	ENST00000374012
chr20:+:42232898-42242489	20	+	42232899	42242489	chr20:+:42232898-42233641;chr20:+:42233713-42242489	IFT52	ENSG00000101052	ENST00000373030;ENST00000373039
chr20:+:44443109-44444492	20	+	44443110	44444492	chr20:+:44442103-44444492;chr20:+:44443109-44444028;chr20:+:44443109-44444081;chr20:+:44443109-44444179;chr20:+:44444179-44444492;chr20:+:44444384-44444492	UBE2C	ENSG00000175063	ENST00000356455
chr20:+:53092724-53171471	20	+	53092725	53171471	chr20:+:53092443-53171471;chr20:+:53092551-53171471	DOK5	ENSG00000101134	ENST00000262593
chr20:+:6006884-6011930	20	+	6006885	6011930	chr20:+:5996136-6011930;chr20:+:6006884-6009317;chr20:+:6009371-6011930	CRLS1	ENSG00000088766	ENST00000378868
chr21:-:46330287-46330644	21	-	46330288	46330644	chr21:-:46330287-46330514;chr21:-:46330287-46330639	ITGB2	ENSG00000160255	ENST00000397852;ENST00000302347
chr21:-:46703442-46703940	21	-	46703443	46703940	chr21:-:46703442-46705592	POFUT2	ENSG00000186866	ENST00000349485
chr21:+:27074577-27078290	21	+	27074578	27078290	chr21:+:27074581-27078290	JAM2	ENSG00000154721	ENST00000480456
chr21:+:40880954-40887014	21	+	40880955	40887014	chr21:+:40871841-40887014;chr21:+:40880954-40883606;chr21:+:40883736-40887014	SH3BGR	ENSG00000185437	ENST00000333634
chr21:+:47544834-47545378	21	+	47544835	47545378	chr21:+:47544834-47545179;chr21:+:47545225-47545378	COL6A2	ENSG00000142173	ENST00000300527
chr22:-:17629450-17640015	22	-	17629451	17640015	chr22:-:17624021-17640015;chr22:-:17629450-17630431;chr22:-:17629450-17639346;chr22:-:17630635-17640015	CECR5	ENSG00000069998	ENST00000336737
chr22:-:24621074-24622598	22	-	24621075	24622598	chr22:-:24621074-24621212;chr22:-:24622234-24622598	GGT5	ENSG00000099998	ENST00000327365
chr22:+:35782820-35783054	22	+	35782821	35783054	no.hit	HMOX1	ENSG00000100292	ENST00000216117
chr22:+:40756496-40760279	22	+	40756497	40760279	chr22:+:40756496-40757091;chr22:+:40756496-40757276;chr22:+:40759075-40760279	ADSL	ENSG00000239900	ENST00000216194;ENST00000342312
chr3:-:128344460-128344716	3	-	128344461	128344716	chr3:-:128344496-128344716	RPN1	ENSG00000163902	ENST00000296255
chr3:-:145791139-145796902	3	-	145791140	145796902	chr3:-:145791139-145794568;chr3:-:145794682-145796902;chr3:-:145795711-145796902	PLOD2	ENSG00000152952	ENST00000282903;ENST00000360060
chr3:-:179306783-179311552	3	-	179306784	179311552	chr3:-:179306783-179310431;chr3:-:179310527-179311552	MRPL47	ENSG00000136522	ENST00000476781;ENST00000392659
chr3:-:185644502-185655612	3	-	185644503	185655612	chr3:-:185643414-185655612;chr3:-:185644522-185655612;chr3:-:185649640-185655612	TRA2B	ENSG00000136527	ENST00000453386;ENST00000456380
chr3:-:186954355-186961271	3	-	186954356	186961271	chr3:-:186954355-186959268;chr3:-:186959343-186961271	MASP1	ENSG00000127241	ENST00000296280
chr3:-:47537687-47543139	3	-	47537688	47543139	chr3:-:47537687-47539775;chr3:-:47539922-47543139	ELP6	ENSG00000163832	ENST00000296149
chr3:-:49054277-49054660	3	-	49054278	49054660	chr3:-:49054280-49054660	DALRD3	ENSG00000178149	ENST00000341949
chr3:-:66457915-66463294	3	-	66457916	66463294	chr3:-:66457915-66460552;chr3:-:66460696-66463294	LRIG1	ENSG00000144749	ENST00000273261
chr3:+:28283303-28295221	3	+	28283304	28295221	chr3:+:28283303-28304781;chr3:+:28283303-28357823	CMC1	ENSG00000187118	ENST00000423894
chr3:+:53892462-53892745	3	+	53892463	53892745	chr3:+:53891717-53892745	IL17RB	ENSG00000056736	ENST00000288167
chr4:-:185311903-185313983	4	-	185311904	185313983	chr4:-:185311903-185320068	IRF2	ENSG00000168310	ENST00000393593
chr4:-:5018906-5019967	4	-	5018907	5019967	chr4:-:5018906-5021019	CYTL1	ENSG00000170891	ENST00000307746
chr4:+:110482173-110580166	4	+	110482174	110580166	chr4:+:110481592-110580166;chr4:+:110482173-110569639;chr4:+:110569805-110580166	CCDC109B	ENSG00000005059	ENST00000394650
chr4:+:110605705-110606406	4	+	110605706	110606406	chr4:+:110605802-110606406	CCDC109B	ENSG00000005059	ENST00000394650
chr4:+:110605802-110606422	4	+	110605803	110606422	chr4:+:110605802-110606406	CCDC109B	ENSG00000005059	ENST00000394650
chr4:+:169812208-169824907	4	+	169812209	169824907	chr4:+:169812208-169815729;chr4:+:169819865-169824907	PALLD	ENSG00000129116	ENST00000507735
chr4:+:57318218-57325537	4	+	57318219	57325537	chr4:+:57318218-57319768;chr4:+:57319927-57325537	PAICS	ENSG00000128050	ENST00000264221;ENST00000399688
chr4:+:57319927-57322278	4	+	57319928	57322278	chr4:+:57319927-57325537	PAICS	ENSG00000128050	ENST00000264221;ENST00000399688
chr4:+:57322400-57325537	4	+	57322401	57325537	chr4:+:57319927-57325537	PAICS	ENSG00000128050	ENST00000264221;ENST00000399688
chr5:-:140012562-140012653	5	-	140012563	140012653	chr5:-:140012565-140012653	CD14	ENSG00000170458	ENST00000401743
chr5:-:156525909-156531676	5	-	156525910	156531676	chr5:-:156525912-156531676	HAVCR2	ENSG00000135077	ENST00000307851
chr5:+:102323275-102325975	5	+	102323276	102325975	chr5:+:102296933-102325975;chr5:+:102310140-102325975	PAM	ENSG00000145730	ENST00000348126;ENST00000379799
chr5:+:125759381-125764307	5	+	125759382	125764307	chr5:+:125759381-125781172;chr5:+:125759381-125801068;chr5:+:125759381-125801117	GRAMD3	ENSG00000155324	ENST00000285689
chr5:+:140855713-140856537	5	+	140855714	140856537	no.hit	PCDHGC3	ENSG00000240184	ENST00000308177
chr5:+:151151593-151166132	5	+	151151594	151166132	chr5:+:151151597-151166132;chr5:+:151152229-151166132	G3BP1	ENSG00000145907	ENST00000356245
chr5:+:38904126-38904451	5	+	38904127	38904451	chr5:+:38904126-38904454	OSMR	ENSG00000145623	ENST00000274276
chr5:+:43245584-43277158	5	+	43245585	43277158	chr5:+:43246169-43277158	NIM1K	ENSG00000177453	ENST00000326035
chr5:+:95119667-95128762	5	+	95119668	95128762	chr5:+:95119667-95124465;chr5:+:95124562-95128762	RHOBTB3	ENSG00000164292	ENST00000379982
chr6:-:11000151-11000319	6	-	11000152	11000319	chr6:-:10995411-11000319	ELOVL2	ENSG00000197977	ENST00000354666
chr6:-:143825222-143825303	6	-	143825223	143825303	no.hit	FUCA2	ENSG00000001036	ENST00000002165
chr6:-:30168900-30172432	6	-	30168901	30172432	chr6:-:30166924-30172432;chr6:-:30168860-30172432;chr6:-:30168915-30172432	TRIM26	ENSG00000234127	ENST00000453195
chr6:-:30569925-30570021	6	-	30569926	30570021	no.hit	PPP1R10	ENSG00000204569	ENST00000376511
chr6:-:31704127-31704259	6	-	31704128	31704259	out.of.scope	CLIC1	ENSG00000213719	ENST00000375784;ENST00000375779
chr6:-:32485615-32485830	6	-	32485616	32485830	chr6:-:32485529-32485830	HLA-DRB5	ENSG00000198502	ENST00000374975
chr6:-:32486443-32487156	6	-	32486444	32487156	chr6:-:32486443-32487146	HLA-DRB5	ENSG00000198502	ENST00000374975
chr6:-:32814979-32815289	6	-	32814980	32815289	chr6:-:32814981-32815289	TAP1	ENSG00000168394	ENST00000354258
chr6:-:32917152-32917387	6	-	32917153	32917387	chr6:-:32917176-32917387	HLA-DMA	ENSG00000204257	ENST00000374843
chr6:-:41126518-41126633	6	-	41126519	41126633	chr6:-:41126518-41126610;chr6:-:41126518-41127529	TREM2	ENSG00000095970	ENST00000373113
chr6:-:41126801-41127529	6	-	41126802	41127529	chr6:-:41126518-41127529;chr6:-:41126804-41127529;chr6:-:41126844-41127529	TREM2	ENSG00000095970	ENST00000373113
chr6:-:4133935-4134546	6	-	4133936	4134546	chr6:-:4133935-4135603;chr6:-:4133935-4135744	ECI2	ENSG00000198721	ENST00000380118;ENST00000361538
chr6:-:41875025-41884522	6	-	41875026	41884522	chr6:-:41875025-41877006;chr6:-:41875025-41877082;chr6:-:41877260-41884522;chr6:-:41880838-41884522	MED20	ENSG00000124641	ENST00000265350
chr6:-:52131491-52132662	6	-	52131492	52132662	chr6:-:52131494-52132662	MCM3	ENSG00000112118	ENST00000229854
chr6:+:10695302-10697553	6	+	10695303	10697553	chr6:+:10695302-10697556	PAK1IP1	ENSG00000111845	ENST00000379568
chr6:+:26409961-26410233	6	+	26409962	26410233	chr6:+:26409961-26410121;chr6:+:26410142-26410233	BTN3A1	ENSG00000026950	ENST00000289361
chr6:+:31583513-31583795	6	+	31583514	31583795	chr6:+:31583513-31583880	AIF1	ENSG00000204472	ENST00000376059;ENST00000337917
chr6:+:31583513-31583798	6	+	31583514	31583798	chr6:+:31583513-31583880	AIF1	ENSG00000204472	ENST00000376059;ENST00000337917
chr6:+:32411683-32412428	6	+	32411684	32412428	chr6:+:32411698-32412428	HLA-DRA	ENSG00000204287	ENST00000395388
chr6:+:33374652-33377254	6	+	33374653	33377254	chr6:+:33374652-33377422	KIFC1	ENSG00000237649	ENST00000428849
chr6:+:41607658-41613863	6	+	41607659	41613863	chr6:+:41606563-41613863	MDFI	ENSG00000112559	ENST00000230321
chr6:+:6626654-6649862	6	+	6626655	6649862	chr6:+:6626654-6649857	LY86	ENSG00000112799	ENST00000379953
chr7:-:105904052-105908909	7	-	105904053	105908909	chr7:-:105904063-105908909	NAMPT	ENSG00000105835	ENST00000222553;ENST00000354289
chr7:-:105913101-105915391	7	-	105913102	105915391	chr7:-:105913104-105915391	NAMPT	ENSG00000105835	ENST00000222553;ENST00000354289
chr7:-:105915489-105917468	7	-	105915490	105917468	chr7:-:105915495-105917468	NAMPT	ENSG00000105835	ENST00000222553;ENST00000354289
chr7:-:105915495-105917529	7	-	105915496	105917529	chr7:-:105915495-105917468	NAMPT	ENSG00000105835	ENST00000222553;ENST00000354289
chr7:-:107791151-107799907	7	-	107791152	107799907	chr7:-:107790592-107799907;chr7:-:107791198-107799907;chr7:-:107796893-107799907	NRCAM	ENSG00000091129	ENST00000351718
chr7:-:107875132-107953108	7	-	107875133	107953108	chr7:-:107875132-107875215;chr7:-:107875132-107878195;chr7:-:107875132-107880402;chr7:-:107880614-107953108	NRCAM	ENSG00000091129	ENST00000351718
chr7:-:120495435-120496751	7	-	120495436	120496751	chr7:-:120480163-120496751	TSPAN12	ENSG00000106025	ENST00000222747
chr7:-:134853812-134855027	7	-	134853813	134855027	chr7:-:134853812-134854173;chr7:-:134853812-134855150;chr7:-:134853812-134855403	C7orf49	ENSG00000122783	ENST00000424142
chr7:-:140244673-140246598	7	-	140244674	140246598	chr7:-:140244566-140246598	DENND2A	ENSG00000146966	ENST00000537639;ENST00000496613
chr7:-:2275199-2279164	7	-	2275200	2279164	chr7:-:2275199-2277649;chr7:-:2275199-2278468;chr7:-:2275199-2278815;chr7:-:2275199-2279052	FTSJ2	ENSG00000122687	ENST00000242257
chr7:-:2296655-2296999	7	-	2296656	2296999	chr7:-:2296658-2296999	SNX8	ENSG00000106266	ENST00000222990;ENST00000480807
chr7:-:29035498-29058959	7	-	29035499	29058959	chr7:-:29035498-29070192	CPVL	ENSG00000106066	ENST00000396276;ENST00000432534
chr7:-:29070375-29105638	7	-	29070376	29105638	chr7:-:29070375-29103676;chr7:-:29070375-29111388;chr7:-:29103850-29105638	CPVL	ENSG00000106066	ENST00000396276;ENST00000432534
chr7:-:32527369-32528864	7	-	32527370	32528864	chr7:-:32527369-32528236;chr7:-:32527369-32528845	LSM5	ENSG00000106355	ENST00000450169;ENST00000409909;ENST00000409292
chr7:-:44875257-44880554	7	-	44875258	44880554	chr7:-:44875257-44880497;chr7:-:44875257-44882875	H2AFV	ENSG00000105968	ENST00000222690;ENST00000349299;ENST00000308153
chr7:-:45953237-45954403	7	-	45953238	45954403	chr7:-:45953433-45954403;chr7:-:45954147-45954403	IGFBP3	ENSG00000146674	ENST00000381086
chr7:-:45953240-45954403	7	-	45953241	45954403	chr7:-:45953433-45954403;chr7:-:45954147-45954403	IGFBP3	ENSG00000146674	ENST00000381086
chr7:-:54823563-54825187	7	-	54823564	54825187	chr7:-:54823574-54825187	SEC61G	ENSG00000132432	ENST00000395535;ENST00000352861
chr7:-:56079562-56088765	7	-	56079563	56088765	chr7:-:56079562-56082715;chr7:-:56087427-56088765;chr7:-:56087501-56088765	PSPH	ENSG00000146733	ENST00000395471
chr7:-:56085072-56088765	7	-	56085073	56088765	chr7:-:56085072-56087292;chr7:-:56087427-56088765;chr7:-:56087501-56088765	PSPH	ENSG00000146733	ENST00000395471
chr7:-:56101847-56110083	7	-	56101848	56110083	chr7:-:56101847-56110840;chr7:-:56101847-56118830;chr7:-:56101847-56119006	PSPH	ENSG00000146733	ENST00000395471
chr7:-:56110336-56110840	7	-	56110337	56110840	chr7:-:56101847-56110840	PSPH	ENSG00000146733	ENST00000395471
chr7:-:56110336-56118830	7	-	56110337	56118830	chr7:-:56088924-56118830;chr7:-:56101796-56118830;chr7:-:56101799-56118830;chr7:-:56101847-56118830	PSPH	ENSG00000146733	ENST00000395471
chr7:-:56150634-56150970	7	-	56150635	56150970	chr7:-:56149448-56150970;chr7:-:56149946-56150970	PHKG1	ENSG00000164776	ENST00000537360
chr7:-:56151130-56151342	7	-	56151131	56151342	chr7:-:56151134-56151342	PHKG1	ENSG00000164776	ENST00000537360
chr7:-:63982878-64023302	7	-	63982879	64023302	chr7:-:63982878-64004084;chr7:-:64004180-64023302;chr7:-:64004810-64023302;chr7:-:64021651-64023302	ZNF680	ENSG00000173041	ENST00000309683
chr7:-:65432894-65435301	7	-	65432895	65435301	chr7:-:65432894-65435268;chr7:-:65432894-65439281	GUSB	ENSG00000169919	ENST00000304895
chr7:-:72987275-72987649	7	-	72987276	72987649	chr7:-:72987300-72987649	TBL2	ENSG00000106638	ENST00000450285
chr7:-:73657576-73657806	7	-	73657577	73657806	chr7:-:73657576-73660991;chr7:-:73657576-73663341;chr7:-:73657576-73664068	RFC2	ENSG00000049541	ENST00000055077
chr7:-:76247617-76247828	7	-	76247618	76247828	chr7:-:76247617-76247813;chr7:-:76247617-76254838	POMZP3	ENSG00000146707	ENST00000310842
chr7:+:100453459-100456456	7	+	100453460	100456456	chr7:+:100450461-100456456;chr7:+:100452000-100456456;chr7:+:100453459-100454489;chr7:+:100454798-100456456	SLC12A9	ENSG00000146828	ENST00000354161
chr7:+:121644714-121650390	7	+	121644715	121650390	chr7:+:121644714-121650387	PTPRZ1	ENSG00000106278	ENST00000393386;ENST00000449182
chr7:+:130140731-130142494	7	+	130140732	130142494	chr7:+:130140731-130142484	MEST	ENSG00000106484	ENST00000416162;ENST00000393187;ENST00000223215
chr7:+:134635265-134644724	7	+	134635266	134644724	chr7:+:134635265-134642819;chr7:+:134643041-134644724	CALD1	ENSG00000122786	ENST00000361901;ENST00000393118
chr7:+:139026237-139030246	7	+	139026238	139030246	chr7:+:139024252-139030246;chr7:+:139025345-139030246;chr7:+:139025365-139030246;chr7:+:139026268-139030246;chr7:+:139029736-139030246	C7orf55;LUC7L2	ENSG00000164898;ENSG00000269955	ENST00000468383;ENST00000481123;ENST00000297534;ENST00000541515
chr7:+:150768384-150768775	7	+	150768385	150768775	chr7:+:150768384-150768476;chr7:+:150768692-150768775	SLC4A2	ENSG00000164889	ENST00000413384;ENST00000392826
chr7:+:23299757-23300106	7	+	23299758	23300106	chr7:+:23299757-23300074	GPNMB	ENSG00000136235	ENST00000258733;ENST00000381990
chr7:+:23300392-23301100	7	+	23300393	23301100	chr7:+:23300392-23306099;chr7:+:23300392-23306135	GPNMB	ENSG00000136235	ENST00000258733;ENST00000381990
chr7:+:23301184-23306135	7	+	23301185	23306135	chr7:+:23300392-23306135	GPNMB	ENSG00000136235	ENST00000258733;ENST00000381990
chr7:+:2566016-2566469	7	+	2566017	2566469	chr7:+:2566043-2566469	LFNG	ENSG00000106003	ENST00000338732;ENST00000222725
chr7:+:2566555-2567172	7	+	2566556	2567172	chr7:+:2566555-2566779	LFNG	ENSG00000106003	ENST00000338732;ENST00000222725
chr7:+:44147683-44148529	7	+	44147684	44148529	chr7:+:44147683-44148497	AEBP1	ENSG00000106624	ENST00000223357
chr7:+:44150838-44151114	7	+	44150839	44151114	chr7:+:44150838-44151105	AEBP1	ENSG00000106624	ENST00000223357;ENST00000450684;ENST00000413907
chr7:+:44152950-44153196	7	+	44152951	44153196	chr7:+:44152950-44153192	AEBP1	ENSG00000106624	ENST00000223357;ENST00000450684;ENST00000413907
chr7:+:44153695-44153743	7	+	44153696	44153743	no.hit	AEBP1	ENSG00000106624	ENST00000223357;ENST00000450684;ENST00000413907
chr7:+:55087058-55223522	7	+	55087059	55223522	chr7:+:55087058-55111525;chr7:+:55087058-55186748;chr7:+:55087058-55209978;chr7:+:55221845-55223522	EGFR	ENSG00000146648	ENST00000275493
chr7:+:55177651-55177972	7	+	55177652	55177972	chr7:+:55177651-55209978	EGFR	ENSG00000146648	ENST00000275493
chr7:+:55177651-55186748	7	+	55177652	55186748	chr7:+:55087058-55186748;chr7:+:55177651-55209978	EGFR	ENSG00000146648	ENST00000275493
chr7:+:55225446-55231425	7	+	55225447	55231425	chr7:+:55225446-55227831;chr7:+:55229324-55231425	EGFR	ENSG00000146648	ENST00000275493
chr7:+:55275234-55275306	7	+	55275235	55275306	no.hit	EGFR	ENSG00000146648	ENST00000275493
chr7:+:6049009-6054776	7	+	6049010	6054776	chr7:+:6049009-6054532;chr7:+:6049129-6054776;chr7:+:6052771-6054776;chr7:+:6054683-6054776	AIMP2	ENSG00000106305	ENST00000223029
chr7:+:65580449-65592690	7	+	65580450	65592690	chr7:+:65579901-65592690;chr7:+:65579957-65592690;chr7:+:65591630-65592690	CRCP	ENSG00000241258	ENST00000395326
chr7:+:65821858-65824040	7	+	65821859	65824040	chr7:+:65821858-65824022;chr7:+:65821858-65824881	TPST1	ENSG00000169902	ENST00000304842
chr7:+:65821858-65824886	7	+	65821859	65824886	chr7:+:65821858-65824022;chr7:+:65821858-65824881	TPST1	ENSG00000169902	ENST00000304842
chr7:+:6630106-6631383	7	+	6630107	6631383	chr7:+:6630106-6631276;chr7:+:6630106-6631333	C7orf26	ENSG00000146576	ENST00000344417
chr7:+:73475469-73477488	7	+	73475470	73477488	chr7:+:73475469-73477482	ELN	ENSG00000049540	ENST00000357036;ENST00000380576
chr7:+:73480333-73481064	7	+	73480334	73481064	no.hit	ELN	ENSG00000049540	ENST00000357036;ENST00000380576
chr7:+:98990499-98991655	7	+	98990500	98991655	chr7:+:98990499-98991651	ARPC1B	ENSG00000130429	ENST00000252725
chr7:+:99703914-99704035	7	+	99703915	99704035	chr7:+:99703914-99704025	AP4M1	ENSG00000221838	ENST00000359593
chr8:-:23155635-23159539	8	-	23155636	23159539	chr8:-:23155635-23156348;chr8:-:23156460-23159539	LOXL2	ENSG00000134013	ENST00000389131
chr8:-:77896429-77898422	8	-	77896430	77898422	chr8:-:77896431-77898422	PEX2	ENSG00000164751	ENST00000520103;ENST00000522527;ENST00000518986;ENST00000519956
chr8:+:123875778-123885678	8	+	123875779	123885678	chr8:+:123875778-123963531	ZHX2	ENSG00000178764	ENST00000314393
chr8:+:123885833-123963531	8	+	123885834	123963531	chr8:+:123875778-123963531	ZHX2	ENSG00000178764	ENST00000314393
chr8:+:145582725-145582847	8	+	145582726	145582847	chr8:+:145582318-145582847;chr8:+:145582725-145582843	SLC52A2	ENSG00000185803	ENST00000530047;ENST00000532887
chr8:+:75941752-75944432	8	+	75941753	75944432	chr8:+:75941752-75944425	CRISPLD1	ENSG00000121005	ENST00000262207;ENST00000523524
chr9:-:117804620-117819431	9	-	117804621	117819431	chr9:-:117804620-117808688;chr9:-:117804620-117822008;chr9:-:117804620-117825195;chr9:-:117804620-117835881;chr9:-:117808961-117819431;chr9:-:117810811-117819431;chr9:-:117815294-117819431	TNC	ENSG00000041982	ENST00000350763;ENST00000341037;ENST00000544972;ENST00000498724
chr9:-:117808958-117810538	9	-	117808959	117810538	chr9:-:117808961-117810538	TNC	ENSG00000041982	ENST00000350763;ENST00000341037;ENST00000544972;ENST00000498724
chr9:-:117810811-117835881	9	-	117810812	117835881	chr9:-:117804620-117835881;chr9:-:117808961-117835881;chr9:-:117810811-117815018;chr9:-:117810811-117819431;chr9:-:117819704-117835881;chr9:-:117827198-117835881	TNC	ENSG00000041982	ENST00000350763;ENST00000341037;ENST00000498724
chr9:-:117822090-117822133	9	-	117822091	117822133	no.hit	TNC	ENSG00000041982	ENST00000350763;ENST00000341037;ENST00000544972;ENST00000498724
chr9:-:123622434-123623366	9	-	123622435	123623366	chr9:-:123622463-123623366	PHF19	ENSG00000119403	ENST00000419155
chr9:-:128230388-128240358	9	-	128230389	128240358	chr9:-:128230388-128233361;chr9:-:128230388-128246721;chr9:-:128230388-128268588;chr9:-:128233516-128240358	MAPKAP1	ENSG00000119487	ENST00000373498;ENST00000350766
chr9:-:128230388-128305337	9	-	128230389	128305337	chr9:-:128230388-128233361;chr9:-:128230388-128246721;chr9:-:128230388-128268588;chr9:-:128246862-128305337;chr9:-:128268696-128305337;chr9:-:128284044-128305337	MAPKAP1	ENSG00000119487	ENST00000373498;ENST00000350766
chr9:-:131397538-131398559	9	-	131397539	131398559	chr9:-:131397538-131397936;chr9:-:131398046-131398559	WDR34	ENSG00000119333	ENST00000372715
chr9:-:131398043-131398559	9	-	131398044	131398559	chr9:-:131398046-131398559	WDR34	ENSG00000119333	ENST00000372715
chr9:-:131399306-131402996	9	-	131399307	131402996	chr9:-:131399306-131402969	WDR34	ENSG00000119333	ENST00000372715
chr9:-:14179779-14307212	9	-	14179780	14307212	chr9:-:14179779-14180657;chr9:-:14179779-14306987	NFIB	ENSG00000147862	ENST00000380959
chr9:-:6533160-6534066	9	-	6533161	6534066	chr9:-:6533160-6534707	GLDC	ENSG00000178445	ENST00000321612
chr9:-:6534179-6534707	9	-	6534180	6534707	chr9:-:6533160-6534707	GLDC	ENSG00000178445	ENST00000321612
chr9:+:114688776-114689752	9	+	114688777	114689752	chr9:+:114688776-114691779	UGCG	ENSG00000148154	ENST00000374279
chr9:+:131267183-131269494	9	+	131267184	131269494	chr9:+:131267183-131271154	GLE1	ENSG00000119392	ENST00000309971
chr9:+:131269619-131271154	9	+	131269620	131271154	chr9:+:131267183-131271154	GLE1	ENSG00000119392	ENST00000309971
chr9:+:140638542-140648622	9	+	140638543	140648622	chr9:+:140638542-140639924;chr9:+:140638542-140646782;chr9:+:140646860-140648622	EHMT1	ENSG00000181090	ENST00000460843
chrX:-:119402242-119418981	X	-	119402243	119418981	chrX:-:119402242-119410739;chrX:-:119402242-119421008;chrX:-:119410902-119418981	TMEM255A	ENSG00000125355	ENST00000371369
chrX:-:128782769-128788255	X	-	128782770	128788255	chrX:-:128782769-128788540	APLN	ENSG00000171388	ENST00000429967
chrX:-:135758876-135761693	X	-	135758877	135761693	chrX:-:135758876-135760094;chrX:-:135760115-135761693	ARHGEF6	ENSG00000129675	ENST00000370620
chrX:-:135758876-135762889	X	-	135758877	135762889	chrX:-:135758876-135760094;chrX:-:135761819-135762889	ARHGEF6	ENSG00000129675	ENST00000370620
chrX:-:135819623-135819750	X	-	135819624	135819750	chrX:-:135819623-135825743	ARHGEF6	ENSG00000129675	ENST00000370620
chrX:-:135819819-135825743	X	-	135819820	135825743	chrX:-:135814331-135825743;chrX:-:135819623-135825743	ARHGEF6	ENSG00000129675	ENST00000370620
chrX:-:153216938-153217030	X	-	153216939	153217030	chrX:-:153216938-153217039	HCFC1	ENSG00000172534	ENST00000444191
chrX:-:99884846-99884891	X	-	99884847	99884891	no.hit	TSPAN6	ENSG00000000003	ENST00000373020
chrX:+:150153098-150154067	X	+	150153099	150154067	chrX:+:150149117-150154067;chrX:+:150151849-150154067;chrX:+:150152064-150154067	HMGB3	ENSG00000029993	ENST00000419110;ENST00000325307
chrX:+:152773905-152773974	X	+	152773906	152773974	no.hit	BGN	ENSG00000182492	ENST00000331595
chrX:+:23685935-23689653	X	+	23685936	23689653	no.hit	PRDX4	ENSG00000123131	ENST00000379341
chrX:+:23697404-23700514	X	+	23697405	23700514	chrX:+:23697404-23700512	PRDX4	ENSG00000123131	ENST00000379341
chrX:+:77380928-77381292	X	+	77380929	77381292	no.hit	PGK1	ENSG00000102144	ENST00000373316;ENST00000476531
chr1:-:11983172-11983247	1	-	11983173	11983247	no.hit	KIAA2013	ENSG00000116685	ENST00000376572
chr1:-:149898433-149898546	1	-	149898434	149898546	no.hit	SF3B4	ENSG00000143368	ENST00000271628
chr1:-:153507306-153508424	1	-	153507307	153508424	chr1:-:153507306-153507677;chr1:-:153507836-153508424;chr1:-:153507851-153508424	S100A6	ENSG00000197956	ENST00000496817;ENST00000368719
chr1:-:153507794-153508424	1	-	153507795	153508424	chr1:-:153507836-153508424;chr1:-:153507851-153508424	S100A6	ENSG00000197956	ENST00000496817;ENST00000368719;ENST00000462951
chr1:-:153591514-153597779	1	-	153591515	153597779	chr1:-:153591514-153598795	S100A13	ENSG00000189171	ENST00000339556;ENST00000440685;ENST00000392623;ENST00000392622
chr1:-:156374393-156381974	1	-	156374394	156381974	chr1:-:156374393-156376871;chr1:-:156374393-156377633;chr1:-:156374393-156382313;chr1:-:156374393-156383204;chr1:-:156374393-156383847;chr1:-:156374393-156384445;chr1:-:156374393-156391346;chr1:-:156374393-156396589	C1orf61	ENSG00000125462	ENST00000400991;ENST00000368242;ENST00000497824;ENST00000465270;ENST00000486517;ENST00000310027;ENST00000368243;ENST00000497822;ENST00000357975
chr1:-:156374393-156384605	1	-	156374394	156384605	chr1:-:156374393-156376871;chr1:-:156374393-156377633;chr1:-:156374393-156382313;chr1:-:156374393-156383204;chr1:-:156374393-156383847;chr1:-:156374393-156384445;chr1:-:156374393-156391346;chr1:-:156374393-156396589	C1orf61	ENSG00000125462	ENST00000400991;ENST00000368242;ENST00000497824;ENST00000465270;ENST00000486517;ENST00000310027;ENST00000368243;ENST00000497822;ENST00000357975
chr1:-:156374393-156386560	1	-	156374394	156386560	chr1:-:156374393-156376871;chr1:-:156374393-156377633;chr1:-:156374393-156382313;chr1:-:156374393-156383204;chr1:-:156374393-156383847;chr1:-:156374393-156384445;chr1:-:156374393-156391346;chr1:-:156374393-156396589;chr1:-:156384545-156386560	C1orf61	ENSG00000125462	ENST00000400991;ENST00000368242;ENST00000497824;ENST00000465270;ENST00000486517;ENST00000310027;ENST00000368243;ENST00000497822;ENST00000357975
chr1:-:156374393-156390217	1	-	156374394	156390217	chr1:-:156374393-156376871;chr1:-:156374393-156377633;chr1:-:156374393-156382313;chr1:-:156374393-156383204;chr1:-:156374393-156383847;chr1:-:156374393-156384445;chr1:-:156374393-156391346;chr1:-:156374393-156396589	C1orf61	ENSG00000125462	ENST00000400991;ENST00000497824;ENST00000465270;ENST00000486517;ENST00000310027;ENST00000368243;ENST00000497822;ENST00000357975
chr1:-:156374393-156391316	1	-	156374394	156391316	chr1:-:156374393-156376871;chr1:-:156374393-156377633;chr1:-:156374393-156382313;chr1:-:156374393-156383204;chr1:-:156374393-156383847;chr1:-:156374393-156384445;chr1:-:156374393-156391346;chr1:-:156374393-156396589	C1orf61	ENSG00000125462	ENST00000400991;ENST00000497824;ENST00000465270;ENST00000486517;ENST00000310027;ENST00000368243;ENST00000497822;ENST00000357975
chr1:-:156376989-156377627	1	-	156376990	156377627	chr1:-:156376989-156377633	C1orf61	ENSG00000125462	ENST00000400991;ENST00000368242;ENST00000497824;ENST00000488498;ENST00000465270;ENST00000486517;ENST00000310027;ENST00000368243;ENST00000497822;ENST00000357975
chr1:-:156377745-156384445	1	-	156377746	156384445	chr1:-:156374393-156384445;chr1:-:156377767-156384445;chr1:-:156383289-156384445;chr1:-:156384090-156384445	C1orf61	ENSG00000125462	ENST00000400991;ENST00000368242;ENST00000497824;ENST00000465270;ENST00000486517;ENST00000310027;ENST00000368243;ENST00000497822;ENST00000357975;ENST00000484428;ENST00000489877
chr1:-:156377767-156384070	1	-	156377768	156384070	chr1:-:156377767-156383204;chr1:-:156377767-156383847;chr1:-:156377767-156383875;chr1:-:156377767-156384445;chr1:-:156377767-156389962	C1orf61	ENSG00000125462	ENST00000400991;ENST00000368242;ENST00000497824;ENST00000465270;ENST00000486517;ENST00000310027;ENST00000368243;ENST00000497822;ENST00000357975;ENST00000484428;ENST00000489877
chr1:-:156377767-156391346	1	-	156377768	156391346	chr1:-:156374393-156391346;chr1:-:156377767-156383204;chr1:-:156377767-156383847;chr1:-:156377767-156383875;chr1:-:156377767-156384445;chr1:-:156377767-156389962;chr1:-:156384545-156391346;chr1:-:156387826-156391346	C1orf61	ENSG00000125462	ENST00000400991;ENST00000497824;ENST00000465270;ENST00000486517;ENST00000310027;ENST00000368243;ENST00000497822;ENST00000357975;ENST00000484428;ENST00000489877
chr1:-:156377767-156399167	1	-	156377768	156399167	chr1:-:156377767-156383204;chr1:-:156377767-156383847;chr1:-:156377767-156383875;chr1:-:156377767-156384445;chr1:-:156377767-156389962;chr1:-:156396664-156399167	C1orf61	ENSG00000125462	ENST00000400991;ENST00000497824;ENST00000310027;ENST00000368243;ENST00000357975;ENST00000484428;ENST00000489877
chr1:-:156382070-156384445	1	-	156382071	156384445	chr1:-:156374393-156384445;chr1:-:156377767-156384445;chr1:-:156383289-156384445;chr1:-:156384090-156384445	C1orf61	ENSG00000125462	ENST00000400991;ENST00000368242;ENST00000497824;ENST00000465270;ENST00000486517;ENST00000310027;ENST00000368243;ENST00000497822;ENST00000357975;ENST00000484428;ENST00000489877;ENST00000476966
chr1:-:156383289-156383847	1	-	156383290	156383847	chr1:-:156374393-156383847;chr1:-:156377767-156383847;chr1:-:156383289-156384445	C1orf61	ENSG00000125462	ENST00000400991;ENST00000368242;ENST00000497824;ENST00000465270;ENST00000486517;ENST00000310027;ENST00000368243;ENST00000497822;ENST00000357975;ENST00000484428;ENST00000489877;ENST00000476966
chr1:-:156396661-156399167	1	-	156396662	156399167	chr1:-:156396664-156399167	C1orf61	ENSG00000125462	ENST00000400991;ENST00000497824;ENST00000310027;ENST00000368243;ENST00000357975;ENST00000484428;ENST00000489877;ENST00000476966
chr1:-:156641679-156641745	1	-	156641680	156641745	no.hit	NES	ENSG00000132688	ENST00000368223
chr1:-:17735152-17735475	1	-	17735153	17735475	chr1:-:17735050-17735475	RCC2	ENSG00000179051	ENST00000375436
chr1:-:182354705-182354894	1	-	182354706	182354894	chr1:-:182354691-182354894	GLUL	ENSG00000135821	ENST00000331872;ENST00000417584;ENST00000339526;ENST00000463851;ENST00000461447
chr1:-:182355535-182356263	1	-	182355536	182356263	no.hit	GLUL	ENSG00000135821	ENST00000331872;ENST00000417584;ENST00000339526;ENST00000463851;ENST00000489818
chr1:-:203148304-203148888	1	-	203148305	203148888	chr1:-:203148713-203148888	CHI3L1	ENSG00000133048	ENST00000473185;ENST00000255409;ENST00000404436;ENST00000478742
chr1:-:203148644-203148888	1	-	203148645	203148888	chr1:-:203148713-203148888	CHI3L1	ENSG00000133048	ENST00000473185;ENST00000255409;ENST00000404436;ENST00000478742
chr1:-:203148713-203150289	1	-	203148714	203150289	chr1:-:203148713-203148888;chr1:-:203149005-203150289;chr1:-:203149780-203150289	CHI3L1	ENSG00000133048	ENST00000473185;ENST00000255409;ENST00000404436
chr1:-:203148954-203149597	1	-	203148955	203149597	chr1:-:203149005-203149597	CHI3L1	ENSG00000133048	ENST00000473185;ENST00000255409;ENST00000404436
chr1:-:203149005-203149577	1	-	203149006	203149577	chr1:-:203149005-203149597;chr1:-:203149005-203150289	CHI3L1	ENSG00000133048	ENST00000473185;ENST00000255409;ENST00000404436
chr1:-:203149005-203150327	1	-	203149006	203150327	chr1:-:203149005-203149597;chr1:-:203149005-203150289	CHI3L1	ENSG00000133048	ENST00000473185;ENST00000255409;ENST00000404436
chr1:-:203150395-203151858	1	-	203150396	203151858	chr1:-:203150413-203151858	CHI3L1	ENSG00000133048	ENST00000255409;ENST00000404436;ENST00000472064
chr1:-:203150413-203153703	1	-	203150414	203153703	chr1:-:203150413-203151858;chr1:-:203152919-203153703	CHI3L1	ENSG00000133048	ENST00000255409
chr1:-:203152909-203153703	1	-	203152910	203153703	chr1:-:203152919-203153703	CHI3L1	ENSG00000133048	ENST00000255409
chr1:-:203152909-203153712	1	-	203152910	203153712	no.hit	CHI3L1	ENSG00000133048	ENST00000255409
chr1:-:203152919-203154311	1	-	203152920	203154311	chr1:-:203152919-203153703;chr1:-:203153760-203154311	CHI3L1	ENSG00000133048	ENST00000255409
chr1:-:203154526-203155443	1	-	203154527	203155443	chr1:-:203154513-203155443	CHI3L1	ENSG00000133048	ENST00000255409
chr1:-:203155473-203155645	1	-	203155474	203155645	chr1:-:203155473-203155726	CHI3L1	ENSG00000133048	ENST00000255409
chr1:-:203155473-203155708	1	-	203155474	203155708	chr1:-:203155473-203155726	CHI3L1	ENSG00000133048	ENST00000255409
chr1:-:203155473-203155747	1	-	203155474	203155747	chr1:-:203155473-203155726	CHI3L1	ENSG00000133048	ENST00000255409
chr1:-:32095824-32096150	1	-	32095825	32096150	no.hit	PEF1	ENSG00000162517	ENST00000373703
chr1:-:6246876-6257711	1	-	6246877	6257711	chr1:-:6246876-6252989;chr1:-:6253114-6257711	RPL22	ENSG00000116251	ENST00000234875;ENST00000497965;ENST00000471204
chr1:-:70650597-70671072	1	-	70650598	70671072	chr1:-:70650597-70652947;chr1:-:70654956-70671072	LRRC40	ENSG00000066557	ENST00000370952
chr1:-:8924136-8925343	1	-	8924137	8925343	chr1:-:8924151-8925343	ENO1	ENSG00000074800	ENST00000234590
chr1:-:8930569-8932006	1	-	8930570	8932006	chr1:-:8930569-8931949	ENO1	ENSG00000074800	ENST00000234590
chr1:-:95364953-95367224	1	-	95364954	95367224	chr1:-:95365073-95367224	CNN3	ENSG00000117519	ENST00000370206;ENST00000545882;ENST00000461018
chr1:+:111772503-111773859	1	+	111772504	111773859	chr1:+:111772503-111773363;chr1:+:111773565-111773859	CHI3L2	ENSG00000064886	ENST00000369748
chr1:+:151139890-151140728	1	+	151139891	151140728	chr1:+:151139890-151140619	SCNM1	ENSG00000163156	ENST00000602841;ENST00000368902
chr1:+:153964152-153964553	1	+	153964153	153964553	chr1:+:153964152-153964540	RPS27	ENSG00000177954	ENST00000368567;ENST00000493224
chr1:+:154955873-154960580	1	+	154955874	154960580	chr1:+:154955873-154956317;chr1:+:154955873-154959941;chr1:+:154956542-154960580	FLAD1	ENSG00000160688	ENST00000315144
chr1:+:155708088-155708399	1	+	155708089	155708399	chr1:+:155708049-155708399	DAP3	ENSG00000132676	ENST00000368336
chr1:+:156626181-156627466	1	+	156626182	156627466	chr1:+:156626181-156626729;chr1:+:156626888-156627466	BCAN	ENSG00000132692	ENST00000329117
chr1:+:160181506-160182975	1	+	160181507	160182975	chr1:+:160181506-160182899	PEA15	ENSG00000162734	ENST00000360472;ENST00000488858
chr1:+:22963030-22964102	1	+	22963031	22964102	chr1:+:22963195-22964102;chr1:+:22963353-22964102	C1QA	ENSG00000173372	ENST00000374642
chr1:+:22963195-22964104	1	+	22963196	22964104	chr1:+:22963195-22964102	C1QA	ENSG00000173372	ENST00000374642
chr1:+:22970379-22973719	1	+	22970380	22973719	chr1:+:22970379-22970503;chr1:+:22970697-22973719	C1QC	ENSG00000159189	ENST00000374640;ENST00000374639;ENST00000374637
chr1:+:24020403-24022287	1	+	24020404	24022287	chr1:+:24020403-24021149;chr1:+:24021281-24022287	RPL11	ENSG00000142676	ENST00000374550;ENST00000482370
chr1:+:24021278-24022287	1	+	24021279	24022287	chr1:+:24021281-24022287	RPL11	ENSG00000142676	ENST00000374550;ENST00000482370
chr1:+:93300470-93301757	1	+	93300471	93301757	chr1:+:93300470-93301746	RPL5	ENSG00000122406	ENST00000370321
chr1:+:93300470-93306107	1	+	93300471	93306107	chr1:+:93300470-93301746;chr1:+:93303190-93306107	RPL5	ENSG00000122406	ENST00000370321
chr10:-:25226296-25241456	10	-	25226297	25241456	chr10:-:25226296-25231258;chr10:-:25231365-25241456	PRTFDC1	ENSG00000099256	ENST00000320152
chr10:-:73577233-73577324	10	-	73577234	73577324	chr10:-:73577233-73578373	PSAP	ENSG00000197746	ENST00000394936;ENST00000394934
chr10:-:73577387-73578373	10	-	73577388	73578373	chr10:-:73577233-73578373	PSAP	ENSG00000197746	ENST00000394936;ENST00000394934
chr10:-:73577459-73578373	10	-	73577460	73578373	chr10:-:73577233-73578373	PSAP	ENSG00000197746	ENST00000394936;ENST00000394934
chr10:+:17272709-17275768	10	+	17272710	17275768	chr10:+:17272709-17275585;chr10:+:17275681-17275768	VIM	ENSG00000026025	ENST00000224237
chr10:+:17275930-17276139	10	+	17275931	17276139	chr10:+:17275930-17276691	VIM	ENSG00000026025	ENST00000224237
chr10:+:17276775-17277167	10	+	17276776	17277167	chr10:+:17276817-17277167	VIM	ENSG00000026025	ENST00000224237
chr10:+:17277388-17278292	10	+	17277389	17278292	chr10:+:17277388-17277844;chr10:+:17277888-17278292	VIM	ENSG00000026025	ENST00000224237
chr10:+:17277388-17279228	10	+	17277389	17279228	chr10:+:17277388-17277844;chr10:+:17278378-17279228	VIM	ENSG00000026025	ENST00000224237
chr10:+:17277888-17279228	10	+	17277889	17279228	chr10:+:17277888-17278292;chr10:+:17278378-17279228	VIM	ENSG00000026025	ENST00000224237
chr10:+:70847992-70856944	10	+	70847993	70856944	chr10:+:70847992-70856839;chr10:+:70847992-70863626	SRGN	ENSG00000122862	ENST00000242465
chr11:-:111779691-111782247	11	-	111779692	111782247	chr11:-:111779691-111779876;chr11:-:111779691-111781050;chr11:-:111781173-111782247	CRYAB	ENSG00000109846	ENST00000526180;ENST00000527950;ENST00000227251
chr11:-:118886649-118888991	11	-	118886650	118888991	chr11:-:118886649-118888071;chr11:-:118888763-118888991	RPS25	ENSG00000118181	ENST00000532567;ENST00000527673
chr11:-:119209863-119210268	11	-	119209864	119210268	no.hit	C1QTNF5	ENSG00000223953	ENST00000525657;ENST00000528368
chr11:-:125330562-125331612	11	-	125330563	125331612	chr11:-:125330562-125333379;chr11:-:125330562-125351429	FEZ1	ENSG00000149557	ENST00000527350;ENST00000278919
chr11:-:17096744-17097135	11	-	17096745	17097135	chr11:-:17096744-17097000	RPS13	ENSG00000110700	ENST00000228140;ENST00000525634;ENST00000525828
chr11:-:61727399-61732840	11	-	61727400	61732840	chr11:-:61727376-61732840;chr11:-:61727399-61734783;chr11:-:61732577-61732840;chr11:-:61732584-61732840	FTH1	ENSG00000167996	ENST00000530019
chr11:-:61732363-61732840	11	-	61732364	61732840	chr11:-:61727376-61732840;chr11:-:61732363-61732458;chr11:-:61732577-61732840;chr11:-:61732584-61732840	FTH1	ENSG00000167996	ENST00000530019;ENST00000273550;ENST00000532829;ENST00000534180;ENST00000526640;ENST00000534719;ENST00000533138
chr11:-:61732915-61734783	11	-	61732916	61734783	chr11:-:61727376-61734783;chr11:-:61727399-61734783;chr11:-:61732987-61734783;chr11:-:61733049-61734783	FTH1	ENSG00000167996	ENST00000530019;ENST00000273550;ENST00000532829;ENST00000534180;ENST00000526640;ENST00000534719;ENST00000533138
chr11:-:61732951-61734783	11	-	61732952	61734783	chr11:-:61727376-61734783;chr11:-:61727399-61734783;chr11:-:61732987-61734783;chr11:-:61733049-61734783	FTH1	ENSG00000167996	ENST00000530019;ENST00000273550;ENST00000532829;ENST00000534180;ENST00000526640;ENST00000534719;ENST00000533138
chr11:-:62327299-62327540	11	-	62327300	62327540	chr11:-:62327309-62327540	EEF1G	ENSG00000254772	ENST00000329251
chr11:-:65622919-65623405	11	-	65622920	65623405	chr11:-:65622919-65623124;chr11:-:65623201-65623405	CFL1	ENSG00000172757	ENST00000525451;ENST00000530945;ENST00000308162;ENST00000531413
chr11:-:65623272-65623405	11	-	65623273	65623405	chr11:-:65623201-65623405	CFL1	ENSG00000172757	ENST00000525451;ENST00000530945;ENST00000308162;ENST00000531413
chr11:-:838462-838546	11	-	838463	838546	no.hit	POLR2L	ENSG00000177700	ENST00000534030
chr11:+:18427119-18428720	11	+	18427120	18428720	chr11:+:18427119-18428663	LDHA	ENSG00000134333	ENST00000430553;ENST00000545215;ENST00000227157;ENST00000379412
chr11:+:35201954-35211381	11	+	35201955	35211381	chr11:+:35201954-35208378;chr11:+:35201954-35229683;chr11:+:35208447-35211381	CD44	ENSG00000026508	ENST00000263398
chr11:+:46404011-46404187	11	+	46404012	46404187	chr11:+:46404011-46404136	MDK	ENSG00000110492	ENST00000395566
chr11:+:46404298-46405023	11	+	46404299	46405023	chr11:+:46404298-46405018	MDK	ENSG00000110492	ENST00000395566
chr11:+:6415271-6415516	11	+	6415272	6415516	chr11:+:6415271-6415407;chr11:+:6415271-6415427	SMPD1	ENSG00000166311	ENST00000342245;ENST00000526280
chr11:+:71939891-71940067	11	+	71939892	71940067	chr11:+:71939891-71940133	INPPL1	ENSG00000165458	ENST00000298229;ENST00000538751
chr11:+:75111821-75113471	11	+	75111822	75113471	chr11:+:75111821-75112683;chr11:+:75111821-75115192	RPS3	ENSG00000149273	ENST00000530721;ENST00000422465;ENST00000532872;ENST00000534440;ENST00000527446;ENST00000524851
chr12:-:110874006-110874351	12	-	110874007	110874351	no.hit	ARPC3	ENSG00000111229	ENST00000228825
chr12:-:120634731-120635124	12	-	120634732	120635124	chr12:-:120634737-120635124	RPLP0	ENSG00000089157	ENST00000392514;ENST00000313104;ENST00000228306;ENST00000549098;ENST00000551258
chr12:-:120637288-120638885	12	-	120637289	120638885	chr12:-:120637288-120637848;chr12:-:120637288-120638521;chr12:-:120637288-120638532;chr12:-:120638634-120638885;chr12:-:120638694-120638885	RPLP0	ENSG00000089157	ENST00000392514;ENST00000313104;ENST00000228306;ENST00000549098;ENST00000551258
chr12:-:124838742-124839382	12	-	124838743	124839382	chr12:-:124838742-124839023;chr12:-:124839128-124839382	NCOR2	ENSG00000196498	ENST00000404121
chr12:-:131276461-131280539	12	-	131276462	131280539	chr12:-:131276522-131280539	STX2	ENSG00000111450	ENST00000261653
chr12:-:133331719-133333219	12	-	133331720	133333219	chr12:-:133331719-133338203	ANKLE2	ENSG00000176915	ENST00000357997
chr12:-:49398799-49398902	12	-	49398800	49398902	chr12:-:49398801-49398902	PRKAG1	ENSG00000181929	ENST00000547306;ENST00000316299
chr12:-:50384126-50385780	12	-	50384127	50385780	chr12:-:50384126-50384466;chr12:-:50384575-50385780	RACGAP1	ENSG00000161800	ENST00000312377
chr12:-:57113380-57118235	12	-	57113381	57118235	chr12:-:57108459-57118235;chr12:-:57108471-57118235;chr12:-:57108487-57118235;chr12:-:57113380-57113509;chr12:-:57115243-57118235	NACA	ENSG00000196531	ENST00000393891;ENST00000546392;ENST00000547914;ENST00000549259;ENST00000551775;ENST00000546862;ENST00000549855
chr12:-:58143287-58144989	12	-	58143288	58144989	chr12:-:58143287-58144224;chr12:-:58143287-58144438;chr12:-:58143287-58145957;chr12:-:58144873-58144989	CDK4	ENSG00000135446	ENST00000257904;ENST00000547281
chr12:-:58144858-58144989	12	-	58144859	58144989	chr12:-:58144873-58144989	CDK4	ENSG00000135446	ENST00000257904;ENST00000547281
chr12:-:58145475-58145957	12	-	58145476	58145957	chr12:-:58143287-58145957;chr12:-:58145125-58145957;chr12:-:58145442-58145957;chr12:-:58145479-58145957;chr12:-:58145519-58145957;chr12:-:58145535-58145957	CDK4	ENSG00000135446	ENST00000257904;ENST00000547281
chr12:+:113349063-113354313	12	+	113349064	113354313	chr12:+:113345024-113354313;chr12:+:113349040-113354313	OAS1	ENSG00000089127	ENST00000202917
chr12:+:53689725-53690074	12	+	53689726	53690074	chr12:+:53689725-53690027;chr12:+:53689725-53690213;chr12:+:53689725-53691633	PFDN5	ENSG00000123349	ENST00000351500;ENST00000550069;ENST00000334478
chr12:+:53690335-53691828	12	+	53690336	53691828	chr12:+:53689423-53691828;chr12:+:53690335-53691633;chr12:+:53691708-53691828	PFDN5	ENSG00000123349	ENST00000351500;ENST00000334478;ENST00000552548
chr12:+:56365496-56366034	12	+	56365497	56366034	no.hit	CDK2	ENSG00000123374	ENST00000266970
chr12:+:56436386-56437163	12	+	56436387	56437163	chr12:+:56436386-56437146	RPS26	ENSG00000197728	ENST00000552361
chr12:+:56510443-56511265	12	+	56510444	56511265	chr12:+:56510443-56510558;chr12:+:56510583-56511265;chr12:+:56510995-56511265	RPL41	ENSG00000229117	ENST00000546591;ENST00000501597;ENST00000358888
chr12:+:56552495-56553378	12	+	56552496	56553378	chr12:+:56552495-56552685;chr12:+:56552495-56553281;chr12:+:56552495-56553370;chr12:+:56552495-56553406;chr12:+:56552495-56553758	MYL6	ENSG00000092841	ENST00000550697;ENST00000548580;ENST00000348108;ENST00000547703;ENST00000547649;ENST00000548725;ENST00000551589;ENST00000548400
chr12:+:56554104-56555172	12	+	56554105	56555172	chr12:+:56554104-56554409;chr12:+:56554104-56555170	MYL6	ENSG00000092841	ENST00000550697;ENST00000548580;ENST00000348108;ENST00000547649;ENST00000548400
chr12:+:56554454-56555172	12	+	56554455	56555172	chr12:+:56554454-56555170	MYL6	ENSG00000092841	ENST00000550697;ENST00000548580;ENST00000348108;ENST00000547649;ENST00000548400
chr12:+:57623370-57623506	12	+	57623371	57623506	no.hit	SHMT2	ENSG00000182199	ENST00000556825
chr12:+:6644027-6645689	12	+	6644028	6645689	chr12:+:6644027-6645659	GAPDH	ENSG00000111640	ENST00000229239;ENST00000396856;ENST00000396861;ENST00000396859;ENST00000466525
chr12:+:6645552-6645659	12	+	6645553	6645659	chr12:+:6644027-6645659;chr12:+:6644157-6645659;chr12:+:6644635-6645659	GAPDH	ENSG00000111640	ENST00000229239;ENST00000396856;ENST00000396861;ENST00000396859;ENST00000466525
chr12:+:6645706-6645903	12	+	6645707	6645903	no.hit	GAPDH	ENSG00000111640	ENST00000229239;ENST00000396856;ENST00000396861;ENST00000396859;ENST00000466525
chr12:+:6646176-6646474	12	+	6646177	6646474	chr12:+:6646176-6646266;chr12:+:6646382-6646474	GAPDH	ENSG00000111640	ENST00000229239;ENST00000396856;ENST00000396861;ENST00000396859;ENST00000466525
chr12:+:6646556-6646756	12	+	6646557	6646756	chr12:+:6646556-6646749	GAPDH	ENSG00000111640	ENST00000229239;ENST00000396856;ENST00000396861;ENST00000396859;ENST00000466525
chr12:+:6646556-6646779	12	+	6646557	6646779	chr12:+:6646556-6646749	GAPDH	ENSG00000111640	ENST00000229239;ENST00000396856;ENST00000396861;ENST00000396859;ENST00000466525
chr12:+:6646556-6646782	12	+	6646557	6646782	chr12:+:6646556-6646749	GAPDH	ENSG00000111640	ENST00000229239;ENST00000396856;ENST00000396861;ENST00000396859;ENST00000466525
chr12:+:6646556-6647266	12	+	6646557	6647266	chr12:+:6646556-6646749;chr12:+:6647162-6647266	GAPDH	ENSG00000111640	ENST00000229239;ENST00000396856;ENST00000396861;ENST00000396859;ENST00000466525
chr12:+:6979300-6979405	12	+	6979301	6979405	chr12:+:6979300-6979428	TPI1	ENSG00000111669	ENST00000396705;ENST00000474253
chr13:-:110838755-110838827	13	-	110838756	110838827	no.hit	COL4A1	ENSG00000187498	ENST00000375820
chr13:-:45911523-45912796	13	-	45911524	45912796	chr13:-:45911523-45911601;chr13:-:45911523-45912794	TPT1	ENSG00000133112	ENST00000379056;ENST00000529421;ENST00000530705;ENST00000379060
chr13:-:45911538-45912794	13	-	45911539	45912794	chr13:-:45911523-45912794;chr13:-:45911688-45912794	TPT1	ENSG00000133112	ENST00000379056;ENST00000529421;ENST00000530705;ENST00000379060
chr13:+:27827980-27830320	13	+	27827981	27830320	chr13:+:27827980-27828356;chr13:+:27827980-27829378;chr13:+:27829486-27830320;chr13:+:27829491-27830320	RPL21	ENSG00000122026	ENST00000311549;ENST00000461690;ENST00000272274;ENST00000493317;ENST00000483765
chr13:+:27828398-27829378	13	+	27828399	27829378	chr13:+:27827980-27829378;chr13:+:27828418-27829378	RPL21	ENSG00000122026	ENST00000311549;ENST00000461690;ENST00000272274;ENST00000493317;ENST00000483765
chr14:-:21488135-21488716	14	-	21488136	21488716	chr14:-:21488128-21488716;chr14:-:21488135-21488654;chr14:-:21488135-21488942	NDRG2	ENSG00000165795	ENST00000350792;ENST00000397858;ENST00000397853;ENST00000360463;ENST00000554143;ENST00000397851;ENST00000403829
chr14:+:23344674-23345331	14	+	23344675	23345331	no.hit	LRP10	ENSG00000197324	ENST00000359591;ENST00000546834
chr14:+:55607081-55609312	14	+	55607082	55609312	chr14:+:55607081-55609301	LGALS3	ENSG00000131981	ENST00000254301
chr14:+:95081421-95085662	14	+	95081422	95085662	chr14:+:95081421-95085531;chr14:+:95081421-95088677	SERPINA3	ENSG00000196136	ENST00000393078;ENST00000393080
chr14:+:95081421-95088685	14	+	95081422	95088685	chr14:+:95081421-95085531;chr14:+:95081421-95088677	SERPINA3	ENSG00000196136	ENST00000393078;ENST00000393080
chr15:-:75969006-75969030	15	-	75969007	75969030	no.hit	CSPG4	ENSG00000173546	ENST00000308508
chr15:+:45007899-45009804	15	+	45007900	45009804	chr15:+:45006746-45009804;chr15:+:45007899-45008526;chr15:+:45008554-45009804	B2M	ENSG00000166710	ENST00000558401;ENST00000559720;ENST00000561424;ENST00000349264;ENST00000559220
chr15:+:45008554-45009622	15	+	45008555	45009622	chr15:+:45008554-45009804	B2M	ENSG00000166710	ENST00000558401;ENST00000559720;ENST00000561424;ENST00000349264;ENST00000559220
chr15:+:45008554-45009812	15	+	45008555	45009812	chr15:+:45008554-45009804	B2M	ENSG00000166710	ENST00000558401;ENST00000559720;ENST00000561424;ENST00000349264;ENST00000559220
chr15:+:69745359-69745672	15	+	69745360	69745672	chr15:+:69745359-69745985;chr15:+:69745359-69747508;chr15:+:69745359-69747766	RPLP1	ENSG00000137818	ENST00000260379;ENST00000357790
chr16:-:18794424-18799384	16	-	18794425	18799384	chr16:-:18794424-18794962;chr16:-:18794424-18796059;chr16:-:18796145-18799384;chr16:-:18797658-18799384	RPS15A	ENSG00000134419	ENST00000322989;ENST00000563390
chr16:+:56623533-56623665	16	+	56623534	56623665	chr16:+:56623533-56623725;chr16:+:56623533-56623781	MT3	ENSG00000087250	ENST00000561640;ENST00000200691;ENST00000566576
chr16:+:56623533-56624751	16	+	56623534	56624751	chr16:+:56623533-56623725;chr16:+:56623533-56623781;chr16:+:56623847-56624751	MT3	ENSG00000087250	ENST00000561640;ENST00000200691;ENST00000566576
chr16:+:56623847-56624458	16	+	56623848	56624458	chr16:+:56623847-56624751	MT3	ENSG00000087250	ENST00000561640;ENST00000200691;ENST00000566576
chr16:+:56642595-56643174	16	+	56642596	56643174	chr16:+:56642595-56642903;chr16:+:56642969-56643174	MT2A	ENSG00000125148	ENST00000245185;ENST00000563985;ENST00000561491
chr16:+:85839470-85840365	16	+	85839471	85840365	chr16:+:85839470-85840061;chr16:+:85839470-85840343;chr16:+:85839470-85840432	COX4I1	ENSG00000131143	ENST00000253452;ENST00000562929
chr16:+:89627776-89628003	16	+	89627777	89628003	chr16:+:89627471-89628003;chr16:+:89627776-89627985	RPL13	ENSG00000167526	ENST00000491523;ENST00000484610;ENST00000563270;ENST00000567815;ENST00000562879;ENST00000565571
chr16:+:89627776-89628006	16	+	89627777	89628006	chr16:+:89627776-89627985	RPL13	ENSG00000167526	ENST00000491523;ENST00000484610;ENST00000563270;ENST00000567815;ENST00000562879;ENST00000565571
chr17:-:1248793-1264385	17	-	1248794	1264385	chr17:-:1248793-1251255;chr17:-:1248793-1257504;chr17:-:1248793-1268152;chr17:-:1248793-1303340;chr17:-:1257641-1264385	YWHAE	ENSG00000108953	ENST00000264335;ENST00000466227;ENST00000571732;ENST00000573196;ENST00000575977
chr17:-:37006716-37008856	17	-	37006717	37008856	chr17:-:37004310-37008856;chr17:-:37006728-37008856	RPL23	ENSG00000125691	ENST00000394332;ENST00000245857;ENST00000577407
chr17:-:42983148-42985431	17	-	42983149	42985431	chr17:-:42984756-42985431	GFAP	ENSG00000131095	ENST00000253408
chr17:-:42983532-42985431	17	-	42983533	42985431	chr17:-:42984756-42985431	GFAP	ENSG00000131095	ENST00000253408
chr17:-:42984340-42985431	17	-	42984341	42985431	chr17:-:42984756-42985431	GFAP	ENSG00000131095	ENST00000253408;ENST00000589701
chr17:-:42984571-42985431	17	-	42984572	42985431	chr17:-:42984756-42985431	GFAP	ENSG00000131095	ENST00000253408;ENST00000589701
chr17:-:42985510-42987982	17	-	42985511	42987982	chr17:-:42985517-42987982;chr17:-:42987628-42987982	GFAP	ENSG00000131095	ENST00000253408;ENST00000585543;ENST00000591880;ENST00000586125
chr17:-:42985517-42987459	17	-	42985518	42987459	chr17:-:42985517-42987077;chr17:-:42985517-42987508;chr17:-:42985517-42987982	GFAP	ENSG00000131095	ENST00000253408;ENST00000585543;ENST00000591880;ENST00000586125
chr17:-:42985517-42987593	17	-	42985518	42987593	chr17:-:42985517-42987077;chr17:-:42985517-42987508;chr17:-:42985517-42987982	GFAP	ENSG00000131095	ENST00000253408;ENST00000585543;ENST00000591880;ENST00000586125
chr17:-:42985517-42988603	17	-	42985518	42988603	chr17:-:42985517-42987077;chr17:-:42985517-42987508;chr17:-:42985517-42987982;chr17:-:42988026-42988603	GFAP	ENSG00000131095	ENST00000253408;ENST00000585543
chr17:-:42987369-42987459	17	-	42987370	42987459	no.hit	GFAP	ENSG00000131095	ENST00000253408;ENST00000585543;ENST00000591880;ENST00000586125;ENST00000435360
chr17:-:42987369-42987982	17	-	42987370	42987982	chr17:-:42985517-42987982;chr17:-:42987628-42987982	GFAP	ENSG00000131095	ENST00000253408;ENST00000585543;ENST00000591880;ENST00000586125;ENST00000435360
chr17:-:42987545-42987982	17	-	42987546	42987982	chr17:-:42985517-42987982;chr17:-:42987628-42987982	GFAP	ENSG00000131095	ENST00000253408;ENST00000585543;ENST00000591880;ENST00000586125;ENST00000435360
chr17:-:42988007-42988603	17	-	42988008	42988603	chr17:-:42988026-42988603	GFAP	ENSG00000131095	ENST00000253408;ENST00000585543;ENST00000435360;ENST00000586793
chr17:-:42988026-42989039	17	-	42988027	42989039	chr17:-:42988026-42988603;chr17:-:42988824-42989039	GFAP	ENSG00000131095	ENST00000253408;ENST00000435360;ENST00000586793
chr17:-:42988050-42988603	17	-	42988051	42988603	chr17:-:42988026-42988603	GFAP	ENSG00000131095	ENST00000253408;ENST00000585543;ENST00000435360;ENST00000586793
chr17:-:42988791-42989039	17	-	42988792	42989039	chr17:-:42988824-42989039	GFAP	ENSG00000131095	ENST00000253408;ENST00000435360;ENST00000586793
chr17:-:42988803-42989039	17	-	42988804	42989039	chr17:-:42988824-42989039	GFAP	ENSG00000131095	ENST00000253408;ENST00000435360;ENST00000586793
chr17:-:42988911-42989039	17	-	42988912	42989039	chr17:-:42988824-42989039	GFAP	ENSG00000131095	ENST00000253408;ENST00000435360;ENST00000586793
chr17:-:42989158-42990636	17	-	42989159	42990636	chr17:-:42989165-42990636	GFAP	ENSG00000131095	ENST00000253408;ENST00000435360;ENST00000586793
chr17:-:42989190-42990636	17	-	42989191	42990636	chr17:-:42989165-42990636	GFAP	ENSG00000131095	ENST00000253408;ENST00000435360;ENST00000586793
chr17:-:42991191-42992404	17	-	42991192	42992404	chr17:-:42991191-42991395;chr17:-:42991191-42992393	GFAP	ENSG00000131095	ENST00000253408;ENST00000435360;ENST00000586793
chr17:-:42991191-42992596	17	-	42991192	42992596	chr17:-:42991191-42991395;chr17:-:42991191-42992393	GFAP	ENSG00000131095	ENST00000253408;ENST00000435360;ENST00000586793
chr17:-:42991449-42992393	17	-	42991450	42992393	chr17:-:42991191-42992393;chr17:-:42991456-42992393;chr17:-:42991477-42992393	GFAP	ENSG00000131095	ENST00000253408;ENST00000435360;ENST00000586793
chr17:-:42991456-42992404	17	-	42991457	42992404	chr17:-:42991456-42992393	GFAP	ENSG00000131095	ENST00000253408;ENST00000435360;ENST00000586793
chr17:-:42991456-42992596	17	-	42991457	42992596	chr17:-:42991456-42992393	GFAP	ENSG00000131095	ENST00000253408;ENST00000435360;ENST00000586793
chr17:-:48263868-48264003	17	-	48263869	48264003	chr17:-:48263868-48264000	COL1A1	ENSG00000108821	ENST00000225964
chr17:-:4850007-4851557	17	-	4850008	4851557	chr17:-:4850115-4851557	PFN1	ENSG00000108518	ENST00000225655
chr17:-:79479087-79479257	17	-	79479088	79479257	chr17:-:79479141-79479257;chr17:-:79479168-79479257	ACTG1	ENSG00000184009	ENST00000331925;ENST00000576917;ENST00000570382
chr17:-:8281010-8285460	17	-	8281011	8285460	chr17:-:8281010-8283113;chr17:-:8283254-8285460;chr17:-:8284021-8285460	RPL26	ENSG00000161970	ENST00000293842;ENST00000584164
chr17:-:8281962-8283113	17	-	8281963	8283113	chr17:-:8280996-8283113;chr17:-:8281010-8283113;chr17:-:8281042-8283113	RPL26	ENSG00000161970	ENST00000293842;ENST00000584164
chr17:+:16285296-16285725	17	+	16285297	16285725	no.hit	UBB	ENSG00000170315	ENST00000302182;ENST00000577640;ENST00000535788;ENST00000578649;ENST00000395839
chr17:+:16285444-16285725	17	+	16285445	16285725	chr17:+:16285444-16285672	UBB	ENSG00000170315	ENST00000302182;ENST00000577640;ENST00000535788;ENST00000578649;ENST00000395839
chr17:+:16285461-16285552	17	+	16285462	16285552	no.hit	UBB	ENSG00000170315	ENST00000302182;ENST00000577640;ENST00000535788;ENST00000578649;ENST00000395839
chr17:+:16285461-16285638	17	+	16285462	16285638	no.hit	UBB	ENSG00000170315	ENST00000302182;ENST00000577640;ENST00000535788;ENST00000578649;ENST00000395839
chr17:+:2226450-2226535	17	+	2226451	2226535	no.hit	SRR	ENSG00000167720	ENST00000344595
chr17:+:27076601-27077109	17	+	27076602	27077109	no.hit	TRAF4	ENSG00000076604	ENST00000262395
chr17:+:39846193-39846342	17	+	39846194	39846342	chr17:+:39846193-39846339	EIF1	ENSG00000173812	ENST00000591776;ENST00000469257;ENST00000482111;ENST00000310837;ENST00000469308
chr17:+:40720577-40720880	17	+	40720578	40720880	chr17:+:40720577-40720854	MLX	ENSG00000108788	ENST00000435881
chr17:+:41151017-41151949	17	+	41151018	41151949	chr17:+:41150848-41151949;chr17:+:41150929-41151949	RPL27	ENSG00000131469	ENST00000253788;ENST00000588830;ENST00000589913
chr17:+:80196780-80196822	17	+	80196781	80196822	no.hit	SLC16A3	ENSG00000141526	ENST00000582743
chr18:-:47017297-47017886	18	-	47017298	47017886	chr18:-:47017297-47017721;chr18:-:47017297-47017774;chr18:-:47017297-47017901	RPL17-C18orf32;RPL17	ENSG00000215472;ENSG00000265681	ENST00000584895;ENST00000579248;ENST00000580261;ENST00000578532
chr18:-:47017297-47017995	18	-	47017298	47017995	chr18:-:47017297-47017721;chr18:-:47017297-47017774;chr18:-:47017297-47017901;chr18:-:47017815-47017995	RPL17	ENSG00000265681	ENST00000579248;ENST00000580261;ENST00000578532
chr19:-:14521951-14522317	19	-	14521952	14522317	chr19:-:14521948-14522317;chr19:-:14521984-14522317	DDX39A	ENSG00000123136	ENST00000242776
chr19:-:19010715-19010739	19	-	19010716	19010739	no.hit	COPE	ENSG00000105669	ENST00000262812;ENST00000349893
chr19:-:39924058-39924304	19	-	39924059	39924304	chr19:-:39924058-39924133;chr19:-:39924058-39924157;chr19:-:39924058-39924161;chr19:-:39924209-39924304	RPS16	ENSG00000105193	ENST00000251453;ENST00000601655
chr19:-:39924185-39924304	19	-	39924186	39924304	chr19:-:39924209-39924304	RPS16	ENSG00000105193	ENST00000251453;ENST00000601655
chr19:-:49118676-49119183	19	-	49118677	49119183	no.hit	RPL18	ENSG00000063177	ENST00000547897;ENST00000084795;ENST00000549370;ENST00000549273
chr19:-:50369702-50370008	19	-	50369703	50370008	chr19:-:50369702-50370310	PNKP	ENSG00000039650	ENST00000596014
chr19:-:52249934-52250154	19	-	52249935	52250154	no.hit	FPR1	ENSG00000171051	ENST00000304748
chr19:-:6678458-6679127	19	-	6678459	6679127	no.hit	C3	ENSG00000125730	ENST00000245907;ENST00000599668
chr19:-:6686218-6686756	19	-	6686219	6686756	chr19:-:6677969-6686756;chr19:-:6686298-6686756	C3	ENSG00000125730	ENST00000245907
chr19:-:6712630-6713199	19	-	6712631	6713199	chr19:-:6712613-6713199;chr19:-:6712634-6713199	C3	ENSG00000125730	ENST00000245907
chr19:+:1106265-1106431	19	+	1106266	1106431	chr19:+:1106265-1106376;chr19:+:1106265-1106398	GPX4	ENSG00000167468	ENST00000588919;ENST00000587648
chr19:+:17970783-17972902	19	+	17970784	17972902	chr19:+:17970783-17972101;chr19:+:17972281-17972902	RPL18A	ENSG00000105640	ENST00000222247
chr19:+:17972281-17973726	19	+	17972282	17973726	chr19:+:17972281-17972902;chr19:+:17973032-17973726	RPL18A	ENSG00000105640	ENST00000222247
chr19:+:18684213-18685679	19	+	18684214	18685679	chr19:+:18684213-18684471;chr19:+:18684558-18685679	UBA52	ENSG00000221983	ENST00000430157;ENST00000442744;ENST00000597451
chr19:+:18684558-18685681	19	+	18684559	18685681	chr19:+:18684558-18685679	UBA52	ENSG00000221983	ENST00000430157;ENST00000442744;ENST00000597451
chr19:+:19627141-19638089	19	+	19627142	19638089	chr19:+:19627141-19636833;chr19:+:19627141-19636990;chr19:+:19637069-19638089	NDUFA13	ENSG00000186010	ENST00000507754;ENST00000428459;ENST00000606722
chr19:+:2271075-2271383	19	+	2271076	2271383	chr19:+:2269743-2271383;chr19:+:2270675-2271383	OAZ1	ENSG00000104904	ENST00000590943;ENST00000592787;ENST00000602676;ENST00000581150
chr19:+:2271473-2271780	19	+	2271474	2271780	chr19:+:2269743-2271780;chr19:+:2271529-2271780	OAZ1	ENSG00000104904	ENST00000590943;ENST00000592787;ENST00000602676;ENST00000581150;ENST00000592727
chr19:+:34712643-34718273	19	+	34712644	34718273	chr19:+:34712643-34717312;chr19:+:34712643-34718269	LSM14A	ENSG00000257103	ENST00000544216;ENST00000433627
chr19:+:42364671-42364844	19	+	42364672	42364844	chr19:+:42364359-42364844;chr19:+:42364515-42364844;chr19:+:42364564-42364844	RPS19	ENSG00000105372	ENST00000598742;ENST00000601492;ENST00000221975;ENST00000593863
chr19:+:42365281-42373109	19	+	42365282	42373109	chr19:+:42365281-42365548;chr19:+:42365281-42367940;chr19:+:42365281-42373100	RPS19	ENSG00000105372	ENST00000598742;ENST00000601492;ENST00000221975;ENST00000593863;ENST00000598261
chr19:+:42365281-42373159	19	+	42365282	42373159	chr19:+:42365281-42365548;chr19:+:42365281-42367940;chr19:+:42365281-42373100	RPS19	ENSG00000105372	ENST00000598742;ENST00000221975;ENST00000593863;ENST00000598261
chr19:+:45409098-45409873	19	+	45409099	45409873	chr19:+:45409098-45409843;chr19:+:45409098-45409858	APOE	ENSG00000130203	ENST00000252486;ENST00000446996;ENST00000434152
chr19:+:45409301-45409858	19	+	45409302	45409858	chr19:+:45409098-45409858;chr19:+:45409180-45409858	APOE	ENSG00000130203	ENST00000252486;ENST00000446996;ENST00000434152
chr19:+:45411209-45411737	19	+	45411210	45411737	chr19:+:45411209-45411789	APOE	ENSG00000130203	ENST00000252486;ENST00000446996;ENST00000434152
chr19:+:45451790-45451921	19	+	45451791	45451921	chr19:+:45451790-45451957;chr19:+:45451790-45452019	APOC2	ENSG00000234906	ENST00000252490;ENST00000592257
chr19:+:48830862-48832608	19	+	48830863	48832608	chr19:+:48828867-48832608;chr19:+:48830818-48832608;chr19:+:48830880-48832608;chr19:+:48830921-48832608	EMP3	ENSG00000142227	ENST00000270221;ENST00000597279
chr19:+:48830880-48832688	19	+	48830881	48832688	chr19:+:48830880-48832608	EMP3	ENSG00000142227	ENST00000270221;ENST00000597279
chr19:+:49468736-49468776	19	+	49468737	49468776	no.hit	FTL	ENSG00000087086	ENST00000331825
chr19:+:49468866-49469063	19	+	49468867	49469063	chr19:+:49468866-49469026	FTL	ENSG00000087086	ENST00000331825
chr19:+:49468866-49469537	19	+	49468867	49469537	chr19:+:49468866-49469026;chr19:+:49469173-49469537	FTL	ENSG00000087086	ENST00000331825
chr19:+:49469663-49469803	19	+	49469664	49469803	chr19:+:49469663-49469839	FTL	ENSG00000087086	ENST00000331825
chr19:+:49469663-49469896	19	+	49469664	49469896	chr19:+:49469663-49469839	FTL	ENSG00000087086	ENST00000331825
chr19:+:49993169-49993757	19	+	49993170	49993757	no.hit	RPL13A	ENSG00000142541	ENST00000391857;ENST00000484279;ENST00000479992;ENST00000477613;ENST00000467825
chr19:+:49993179-49993496	19	+	49993180	49993496	chr19:+:49993179-49993383;chr19:+:49993179-49993488	RPL13A	ENSG00000142541	ENST00000391857;ENST00000484279;ENST00000479992;ENST00000477613;ENST00000467825
chr19:+:49993179-49993731	19	+	49993180	49993731	chr19:+:49993179-49993383;chr19:+:49993179-49993488;chr19:+:49993554-49993731	RPL13A	ENSG00000142541	ENST00000391857;ENST00000484279;ENST00000479992;ENST00000477613;ENST00000467825
chr19:+:49993554-49993736	19	+	49993555	49993736	chr19:+:49993554-49993731	RPL13A	ENSG00000142541	ENST00000391857;ENST00000484279;ENST00000479992;ENST00000477613;ENST00000467825
chr19:+:49994088-49994329	19	+	49994089	49994329	no.hit	RPL13A	ENSG00000142541	ENST00000391857;ENST00000484279;ENST00000479992;ENST00000477613;ENST00000467825
chr19:+:49994121-49994329	19	+	49994122	49994329	chr19:+:49994121-49994296	RPL13A	ENSG00000142541	ENST00000391857;ENST00000484279;ENST00000479992;ENST00000477613;ENST00000467825
chr19:+:49994804-49994987	19	+	49994805	49994987	chr19:+:49994804-49994985	RPL13A	ENSG00000142541	ENST00000391857;ENST00000484279;ENST00000479992;ENST00000477613;ENST00000467825
chr19:+:49994804-49995000	19	+	49994805	49995000	chr19:+:49994804-49994985	RPL13A	ENSG00000142541	ENST00000391857;ENST00000484279;ENST00000479992;ENST00000477613;ENST00000467825
chr19:+:49994804-49995006	19	+	49994805	49995006	chr19:+:49994804-49994985	RPL13A	ENSG00000142541	ENST00000391857;ENST00000484279;ENST00000479992;ENST00000477613;ENST00000467825
chr19:+:49999728-50000776	19	+	49999729	50000776	chr19:+:49999728-50000429;chr19:+:49999728-50000450;chr19:+:50000582-50000776	RPS11	ENSG00000142534	ENST00000600027;ENST00000270625;ENST00000594493;ENST00000601216
chr19:+:50000272-50000450	19	+	50000273	50000450	chr19:+:49999728-50000450;chr19:+:49999754-50000450	RPS11	ENSG00000142534	ENST00000600027;ENST00000270625;ENST00000594493;ENST00000601216
chr19:+:50000539-50000776	19	+	50000540	50000776	chr19:+:50000539-50000837;chr19:+:50000582-50000776	RPS11	ENSG00000142534	ENST00000600027;ENST00000270625;ENST00000594493;ENST00000601216
chr19:+:50000556-50000776	19	+	50000557	50000776	chr19:+:50000582-50000776	RPS11	ENSG00000142534	ENST00000600027;ENST00000270625;ENST00000594493;ENST00000601216
chr19:+:50000819-50001173	19	+	50000820	50001173	chr19:+:50000852-50001173	RPS11	ENSG00000142534	ENST00000600027;ENST00000270625;ENST00000594493;ENST00000601216
chr19:+:50000819-50002768	19	+	50000820	50002768	chr19:+:50001303-50002768	RPS11	ENSG00000142534	ENST00000600027;ENST00000270625;ENST00000594493
chr19:+:50000852-50001010	19	+	50000853	50001010	chr19:+:50000852-50001173	RPS11	ENSG00000142534	ENST00000600027;ENST00000270625;ENST00000594493;ENST00000601216
chr19:+:50000852-50002768	19	+	50000853	50002768	chr19:+:50000852-50001173;chr19:+:50001303-50002768	RPS11	ENSG00000142534	ENST00000600027;ENST00000270625;ENST00000594493
chr19:+:54710330-54711238	19	+	54710331	54711238	chr19:+:54710330-54710420;chr19:+:54710330-54711265	RPS9	ENSG00000170889	ENST00000302907;ENST00000436445;ENST00000391752;ENST00000391751;ENST00000391753
chr19:+:54710330-54711278	19	+	54710331	54711278	chr19:+:54710330-54710420;chr19:+:54710330-54711265	RPS9	ENSG00000170889	ENST00000302907;ENST00000436445;ENST00000391752;ENST00000391751;ENST00000391753
chr19:+:54937945-54941727	19	+	54937946	54941727	chr19:+:54937945-54940484;chr19:+:54941135-54941727	TTYH1	ENSG00000167614	ENST00000301194;ENST00000376530;ENST00000376531;ENST00000489425
chr19:+:54946864-54947027	19	+	54946865	54947027	chr19:+:54946864-54947007;chr19:+:54946864-54947270	TTYH1	ENSG00000167614	ENST00000301194;ENST00000376530;ENST00000376531;ENST00000489425;ENST00000492920
chr19:+:55898039-55899297	19	+	55898040	55899297	chr19:+:55898042-55899297;chr19:+:55898061-55899297	RPL28	ENSG00000108107	ENST00000558815;ENST00000560583;ENST00000560055;ENST00000559463;ENST00000558131
chr19:+:55898061-55899302	19	+	55898062	55899302	chr19:+:55898061-55898134;chr19:+:55898061-55898652;chr19:+:55898061-55899297	RPL28	ENSG00000108107	ENST00000558815;ENST00000560583;ENST00000560055;ENST00000559463;ENST00000558131
chr19:+:5691422-5691542	19	+	5691423	5691542	chr19:+:5691464-5691542	RPL36	ENSG00000130255	ENST00000579649;ENST00000347512;ENST00000579446;ENST00000394580
chr19:+:5691468-5691542	19	+	5691469	5691542	chr19:+:5691464-5691542	RPL36	ENSG00000130255	ENST00000579649;ENST00000347512;ENST00000579446;ENST00000394580
chr19:+:580782-581362	19	+	580783	581362	chr19:+:580782-581314	BSG	ENSG00000172270	ENST00000353555
chr19:+:8386979-8387155	19	+	8386980	8387155	chr19:+:8386975-8387155	RPS28	ENSG00000233927	ENST00000600659;ENST00000417088
chr2:-:216230353-216238044	2	-	216230354	216238044	chr2:-:216230353-216232585;chr2:-:216230353-216235016;chr2:-:216232750-216238044;chr2:-:216236738-216238044;chr2:-:216237023-216238044;chr2:-:216237098-216238044	FN1	ENSG00000115414	ENST00000446046;ENST00000432072;ENST00000456923
chr2:-:216232741-216235016	2	-	216232742	216235016	chr2:-:216230353-216235016;chr2:-:216232750-216235016	FN1	ENSG00000115414	ENST00000446046;ENST00000432072;ENST00000456923
chr2:-:216237047-216238044	2	-	216237048	216238044	chr2:-:216232750-216238044;chr2:-:216236738-216238044;chr2:-:216237023-216238044;chr2:-:216237098-216238044	FN1	ENSG00000115414	ENST00000446046;ENST00000432072;ENST00000456923
chr2:-:217538397-217541528	2	-	217538398	217541528	no.hit	IGFBP5	ENSG00000115461	ENST00000233813
chr2:-:219129089-219129237	2	-	219129090	219129237	no.hit	AAMP	ENSG00000127837	ENST00000248450;ENST00000444053
chr2:-:220430236-220431994	2	-	220430237	220431994	chr2:-:220430236-220431551;chr2:-:220431848-220431994	OBSL1	ENSG00000124006	ENST00000289656
chr2:-:85625275-85626258	2	-	85625276	85626258	chr2:-:85625275-85625812;chr2:-:85625905-85626258	CAPG	ENSG00000042493	ENST00000263867;ENST00000409921;ENST00000409670;ENST00000409724;ENST00000483659
chr2:+:118580421-118582144	2	+	118580422	118582144	chr2:+:118579837-118582144	DDX18	ENSG00000088205	ENST00000263239
chr2:+:120124790-120125763	2	+	120124791	120125763	chr2:+:120124636-120125763;chr2:+:120124790-120125134;chr2:+:120125039-120125763;chr2:+:120125104-120125763;chr2:+:120125220-120125763;chr2:+:120125507-120125763	DBI	ENSG00000155368	ENST00000355857;ENST00000409094
chr2:+:120125881-120126604	2	+	120125882	120126604	chr2:+:120125881-120128315	DBI	ENSG00000155368	ENST00000355857;ENST00000409094
chr2:+:120126752-120128315	2	+	120126753	120128315	chr2:+:120125881-120128315	DBI	ENSG00000155368	ENST00000355857;ENST00000409094
chr2:+:120127727-120128315	2	+	120127728	120128315	chr2:+:120125881-120128315	DBI	ENSG00000155368	ENST00000355857;ENST00000409094
chr2:+:217364121-217364648	2	+	217364122	217364648	chr2:+:217364121-217364554;chr2:+:217364121-217364671	RPL37A	ENSG00000197756	ENST00000491306;ENST00000600880;ENST00000420712;ENST00000456586
chr2:+:217364754-217366088	2	+	217364755	217366088	chr2:+:217364754-217366063;chr2:+:217364754-217384054;chr2:+:217364754-217385436;chr2:+:217364754-217393992	RPL37A	ENSG00000197756	ENST00000491306;ENST00000600880;ENST00000420712;ENST00000456586
chr2:+:217525387-217526580	2	+	217525388	217526580	chr2:+:217525509-217526580	IGFBP2	ENSG00000115457	ENST00000233809;ENST00000456764
chr2:+:217525509-217526497	2	+	217525510	217526497	chr2:+:217525509-217526494;chr2:+:217525509-217526580	IGFBP2	ENSG00000115457	ENST00000233809;ENST00000456764;ENST00000436812
chr2:+:217525509-217526595	2	+	217525510	217526595	chr2:+:217525509-217526494;chr2:+:217525509-217526580	IGFBP2	ENSG00000115457	ENST00000233809;ENST00000456764;ENST00000436812
chr2:+:217526721-217528668	2	+	217526722	217528668	chr2:+:217526721-217528662	IGFBP2	ENSG00000115457	ENST00000233809;ENST00000456764;ENST00000436812
chr2:+:231741759-231742114	2	+	231741760	231742114	chr2:+:231740523-231742114;chr2:+:231741682-231742114	ITM2C	ENSG00000135916	ENST00000326427;ENST00000335005;ENST00000326407
chr2:+:232573751-232576057	2	+	232573752	232576057	chr2:+:232573461-232576057;chr2:+:232575011-232576057;chr2:+:232575294-232576057;chr2:+:232575386-232576057	PTMA	ENSG00000187514	ENST00000409115;ENST00000341369
chr2:+:232576693-232577513	2	+	232576694	232577513	chr2:+:232576693-232577152;chr2:+:232576693-232577161;chr2:+:232577226-232577513	PTMA	ENSG00000187514	ENST00000409115;ENST00000341369
chr2:+:232577226-232577636	2	+	232577227	232577636	chr2:+:232577226-232577513	PTMA	ENSG00000187514	ENST00000409115;ENST00000341369
chr2:+:27852036-27852735	2	+	27852037	27852735	chr2:+:27852036-27852725	GPN1	ENSG00000198522	ENST00000610189
chr2:+:55462098-55462548	2	+	55462099	55462548	chr2:+:55462098-55462563	RPS27A	ENSG00000143947	ENST00000402285;ENST00000272317;ENST00000404735
chr2:+:85133241-85133394	2	+	85133242	85133394	chr2:+:85133241-85133512	TMSB10	ENSG00000034510	ENST00000233143
chr2:+:85133241-85133478	2	+	85133242	85133478	chr2:+:85133241-85133512	TMSB10	ENSG00000034510	ENST00000233143
chr2:+:85133241-85133489	2	+	85133242	85133489	chr2:+:85133241-85133512	TMSB10	ENSG00000034510	ENST00000233143
chr2:+:85133241-85133523	2	+	85133242	85133523	chr2:+:85133241-85133512	TMSB10	ENSG00000034510	ENST00000233143
chr2:+:85808779-85808876	2	+	85808780	85808876	no.hit	VAMP8	ENSG00000118640	ENST00000263864
chr20:-:23614615-23615890	20	-	23614616	23615890	chr20:-:23614636-23615890	CST3	ENSG00000101439	ENST00000376925;ENST00000398409
chr20:-:23614632-23615886	20	-	23614633	23615886	no.hit	CST3	ENSG00000101439	ENST00000376925;ENST00000398409
chr20:-:23614632-23615890	20	-	23614633	23615890	chr20:-:23614636-23615890	CST3	ENSG00000101439	ENST00000376925;ENST00000398409
chr20:-:23614636-23618256	20	-	23614637	23618256	chr20:-:23614636-23615890;chr20:-:23616004-23618256	CST3	ENSG00000101439	ENST00000376925;ENST00000398409
chr20:-:23616004-23616116	20	-	23616005	23616116	chr20:-:23616004-23618256	CST3	ENSG00000101439	ENST00000376925;ENST00000398409
chr20:-:23616141-23618256	20	-	23616142	23618256	chr20:-:23616004-23618256	CST3	ENSG00000101439	ENST00000376925;ENST00000398409
chr20:-:46301134-46305237	20	-	46301135	46305237	chr20:-:46301137-46305237	SULF2	ENSG00000196562	ENST00000484875
chr20:+:2729276-2730265	20	+	2729277	2730265	chr20:+:2729276-2730046;chr20:+:2730164-2730265	EBF4	ENSG00000088881	ENST00000342725
chr20:+:53205345-53208219	20	+	53205346	53208219	chr20:+:53205345-53208154	DOK5	ENSG00000101134	ENST00000262593
chr20:+:57466920-57467685	20	+	57466921	57467685	chr20:+:57466920-57470666	GNAS	ENSG00000087460	ENST00000488546;ENST00000477931;ENST00000480975;ENST00000371095;ENST00000371085;ENST00000354359;ENST00000265620
chr20:+:57467567-57470666	20	+	57467568	57470666	chr20:+:57463873-57470666;chr20:+:57463959-57470666;chr20:+:57463963-57470666;chr20:+:57464101-57470666;chr20:+:57464268-57470666;chr20:+:57464387-57470666;chr20:+:57464408-57470666;chr20:+:57464461-57470666;chr20:+:57464604-57470666;chr20:+:57465844-57470666;chr20:+:57466920-57470666;chr20:+:57467264-57470666;chr20:+:57467561-57470666	GNAS	ENSG00000087460	ENST00000488546;ENST00000477931;ENST00000480975;ENST00000371095;ENST00000371085;ENST00000354359;ENST00000265620
chr20:+:57478822-57480477	20	+	57478823	57480477	no.hit	GNAS	ENSG00000087460	ENST00000488546;ENST00000477931;ENST00000480975;ENST00000371095;ENST00000371085;ENST00000354359;ENST00000265620;ENST00000493958
chr20:+:57485456-57485739	20	+	57485457	57485739	chr20:+:57485456-57485737	GNAS	ENSG00000087460	ENST00000477931;ENST00000480975;ENST00000371095;ENST00000371085;ENST00000354359;ENST00000265620
chr20:+:60962970-60963374	20	+	60962971	60963374	chr20:+:60962970-60963364	RPS21	ENSG00000171858	ENST00000343986;ENST00000450116
chr21:-:46328097-46329243	21	-	46328098	46329243	chr21:-:46328097-46330198	ITGB2	ENSG00000160255	ENST00000397852;ENST00000302347
chr21:-:48019401-48022190	21	-	48019402	48022190	chr21:-:48019416-48022190;chr21:-:48020288-48022190	S100B	ENSG00000160307	ENST00000291700;ENST00000367071
chr21:-:48022329-48024941	21	-	48022330	48024941	chr21:-:48022329-48024925	S100B	ENSG00000160307	ENST00000291700;ENST00000367071
chr22:+:38071716-38072992	22	+	38071717	38072992	chr22:+:38071718-38072992;chr22:+:38072195-38072992	LGALS1	ENSG00000100097	ENST00000215909
chr3:-:101400059-101404661	3	-	101400060	101404661	chr3:-:101400059-101401272;chr3:-:101400059-101401614;chr3:-:101401751-101404661	RPL24	ENSG00000114391	ENST00000464595;ENST00000394077;ENST00000495401
chr3:-:12195946-12198319	3	-	12195947	12198319	chr3:-:12195951-12198319	TIMP4	ENSG00000157150	ENST00000287814
chr3:-:125834259-125836847	3	-	125834260	125836847	chr3:-:125831723-125836847;chr3:-:125833499-125836847	ALDH1L1	ENSG00000144908	ENST00000452905
chr3:-:12881029-12882992	3	-	12881030	12882992	chr3:-:12881029-12881640;chr3:-:12881741-12882992;chr3:-:12881840-12882992;chr3:-:12881852-12882992	RPL32	ENSG00000144713	ENST00000429711;ENST00000273223;ENST00000435983;ENST00000457131;ENST00000452606
chr3:-:12881741-12882268	3	-	12881742	12882268	chr3:-:12881741-12882133;chr3:-:12881741-12882992	RPL32	ENSG00000144713	ENST00000429711;ENST00000273223;ENST00000435983;ENST00000457131;ENST00000452606
chr3:-:139076798-139077041	3	-	139076799	139077041	chr3:-:139076800-139077041	COPB2	ENSG00000184432	ENST00000333188;ENST00000507777
chr3:-:149237702-149238617	3	-	149237703	149238617	no.hit	WWTR1	ENSG00000018408	ENST00000465804
chr3:-:183961418-183962388	3	-	183961419	183962388	chr3:-:183961418-183961578;chr3:-:183961784-183962388	ALG3	ENSG00000214160	ENST00000397676
chr3:-:52028142-52029101	3	-	52028143	52029101	chr3:-:52028142-52028788;chr3:-:52028142-52029057	RPL29	ENSG00000162244	ENST00000294189;ENST00000475248
chr3:-:58559266-58563035	3	-	58559267	58563035	chr3:-:58555592-58563035;chr3:-:58556150-58563035	FAM107A	ENSG00000168309	ENST00000360997
chr3:+:115342566-115350095	3	+	115342567	115350095	chr3:+:115342566-115382367;chr3:+:115342566-115394859	GAP43	ENSG00000172020	ENST00000305124
chr3:+:115350159-115394859	3	+	115350160	115394859	chr3:+:115342566-115394859;chr3:+:115382763-115394859	GAP43	ENSG00000172020	ENST00000305124
chr3:+:115395457-115396903	3	+	115395458	115396903	chr3:+:115395457-115439640	GAP43	ENSG00000172020	ENST00000305124
chr3:+:115395457-115439649	3	+	115395458	115439649	chr3:+:115395457-115439640	GAP43	ENSG00000172020	ENST00000305124
chr3:+:39449277-39453139	3	+	39449278	39453139	chr3:+:39449277-39450096;chr3:+:39452490-39453139	RPSA	ENSG00000168028	ENST00000301821;ENST00000458478;ENST00000443003
chr3:+:39450215-39453139	3	+	39450216	39453139	chr3:+:39450215-39452244;chr3:+:39452490-39453139	RPSA	ENSG00000168028	ENST00000301821;ENST00000458478;ENST00000443003
chr3:+:39452490-39453255	3	+	39452491	39453255	chr3:+:39452490-39453139	RPSA	ENSG00000168028	ENST00000301821;ENST00000458478;ENST00000443003
chr4:-:122590875-122591104	4	-	122590876	122591104	no.hit	ANXA5	ENSG00000164111	ENST00000296511;ENST00000501272;ENST00000515017
chr4:-:122592770-122593687	4	-	122592771	122593687	chr4:-:122592797-122593687	ANXA5	ENSG00000164111	ENST00000296511;ENST00000501272;ENST00000515017
chr4:-:39456269-39458025	4	-	39456270	39458025	chr4:-:39456269-39456483;chr4:-:39456549-39458025;chr4:-:39456564-39458025	RPL9	ENSG00000163682	ENST00000295955;ENST00000449470;ENST00000504470
chr4:-:39456599-39458025	4	-	39456600	39458025	chr4:-:39456549-39458025;chr4:-:39456564-39458025	RPL9	ENSG00000163682	ENST00000295955;ENST00000449470;ENST00000504470
chr4:-:39458098-39459205	4	-	39458099	39459205	chr4:-:39458158-39459205	RPL9	ENSG00000163682	ENST00000295955;ENST00000449470;ENST00000504470
chr4:-:48887582-48906500	4	-	48887583	48906500	chr4:-:48887582-48894788;chr4:-:48887582-48896022;chr4:-:48896070-48906500;chr4:-:48899874-48906500;chr4:-:48901942-48906500	OCIAD2	ENSG00000145247	ENST00000508632;ENST00000508069;ENST00000273860
chr4:-:5020082-5021019	4	-	5020083	5021019	chr4:-:5016961-5021019;chr4:-:5018906-5021019	CYTL1	ENSG00000170891	ENST00000307746
chr4:-:57897496-57898591	4	-	57897497	57898591	chr4:-:57897502-57898591	IGFBP7	ENSG00000163453	ENST00000512512;ENST00000295666
chr4:-:57897502-57899360	4	-	57897503	57899360	chr4:-:57897502-57898591;chr4:-:57898718-57899360	IGFBP7	ENSG00000163453	ENST00000512512;ENST00000295666
chr4:-:57898718-57906989	4	-	57898719	57906989	chr4:-:57898718-57899360;chr4:-:57899477-57906989	IGFBP7	ENSG00000163453	ENST00000512512;ENST00000295666
chr4:-:88394946-88400581	4	-	88394947	88400581	chr4:-:88394955-88400581	SPARCL1	ENSG00000152583	ENST00000282470;ENST00000418378;ENST00000503414
chr4:-:88400730-88403575	4	-	88400731	88403575	chr4:-:88400730-88401523;chr4:-:88401672-88403575	SPARCL1	ENSG00000152583	ENST00000282470;ENST00000418378;ENST00000503414
chr4:-:88401672-88403560	4	-	88401673	88403560	chr4:-:88401672-88403575	SPARCL1	ENSG00000152583	ENST00000282470;ENST00000418378;ENST00000503414
chr4:-:88403685-88411424	4	-	88403686	88411424	chr4:-:88403712-88411424	SPARCL1	ENSG00000152583	ENST00000282470;ENST00000418378;ENST00000503414
chr4:+:109543774-109546290	4	+	109543775	109546290	chr4:+:109543774-109546283	RPL34	ENSG00000109475	ENST00000394667;ENST00000394665;ENST00000394668
chr4:+:166414422-166416764	4	+	166414423	166416764	chr4:+:166414422-166416710	CPE	ENSG00000109472	ENST00000402744
chr4:+:88896952-88898008	4	+	88896953	88898008	chr4:+:88896952-88898033	SPP1	ENSG00000118785	ENST00000237623;ENST00000395080;ENST00000508233;ENST00000360804
chr4:+:88898101-88898219	4	+	88898102	88898219	chr4:+:88898101-88898210	SPP1	ENSG00000118785	ENST00000237623;ENST00000395080;ENST00000508233;ENST00000360804;ENST00000505146
chr4:+:88898249-88898844	4	+	88898250	88898844	chr4:+:88898249-88898813;chr4:+:88898249-88901197;chr4:+:88898249-88901544;chr4:+:88898249-88902626	SPP1	ENSG00000118785	ENST00000237623;ENST00000395080;ENST00000508233;ENST00000360804;ENST00000505146
chr4:+:88898249-88900508	4	+	88898250	88900508	chr4:+:88898249-88898813;chr4:+:88898249-88901197;chr4:+:88898249-88901544;chr4:+:88898249-88902626	SPP1	ENSG00000118785	ENST00000237623;ENST00000395080;ENST00000508233;ENST00000360804;ENST00000505146
chr4:+:88900604-88901197	4	+	88900605	88901197	chr4:+:88898249-88901197;chr4:+:88899002-88901197;chr4:+:88899011-88901197	SPP1	ENSG00000118785	ENST00000237623;ENST00000395080;ENST00000508233;ENST00000360804;ENST00000505146
chr5:-:130495304-130500787	5	-	130495305	130500787	chr5:-:130495304-130496348;chr5:-:130495304-130498264;chr5:-:130498369-130500787	HINT1	ENSG00000169567	ENST00000304043;ENST00000513345
chr5:-:133494286-133502860	5	-	133494287	133502860	chr5:-:133494286-133496677;chr5:-:133496821-133502860	SKP1	ENSG00000113558	ENST00000522552;ENST00000521216;ENST00000517625;ENST00000522855;ENST00000328392
chr5:-:149782814-149784242	5	-	149782815	149784242	chr5:-:149782188-149784242;chr5:-:149782875-149784242	CD74	ENSG00000019582	ENST00000377795;ENST00000353334;ENST00000518797;ENST00000009530
chr5:-:149785875-149786443	5	-	149785876	149786443	chr5:-:149785884-149786443	CD74	ENSG00000019582	ENST00000377795;ENST00000353334;ENST00000518797;ENST00000009530
chr5:-:151043158-151043647	5	-	151043159	151043647	chr5:-:151043160-151043647	SPARC	ENSG00000113140	ENST00000231061;ENST00000520687
chr5:-:151043822-151045921	5	-	151043823	151045921	chr5:-:151043796-151045921	SPARC	ENSG00000113140	ENST00000231061;ENST00000520687
chr5:-:151051255-151054172	5	-	151051256	151054172	chr5:-:151051255-151052689;chr5:-:151051255-151066462;chr5:-:151052777-151054172	SPARC	ENSG00000113140	ENST00000231061;ENST00000538026;ENST00000521569;ENST00000539687
chr5:-:151052702-151054205	5	-	151052703	151054205	no.hit	SPARC	ENSG00000113140	ENST00000231061;ENST00000538026;ENST00000521569;ENST00000539687
chr5:-:151052717-151054205	5	-	151052718	151054205	no.hit	SPARC	ENSG00000113140	ENST00000231061;ENST00000538026;ENST00000521569;ENST00000539687
chr5:-:180665184-180666066	5	-	180665185	180666066	chr5:-:180664042-180666066;chr5:-:180665239-180666066	GNB2L1	ENSG00000204628	ENST00000511473;ENST00000504325;ENST00000511566;ENST00000509535;ENST00000376817;ENST00000507000
chr5:-:40834367-40834574	5	-	40834368	40834574	chr5:-:40834367-40834572	RPL37	ENSG00000145592	ENST00000507642;ENST00000504562;ENST00000508493
chr5:-:81572337-81573513	5	-	81572338	81573513	chr5:-:81572337-81573511	RPS23	ENSG00000186468	ENST00000296674;ENST00000512493;ENST00000504293
chr5:-:81573666-81574138	5	-	81573667	81574138	chr5:-:81573671-81574138	RPS23	ENSG00000186468	ENST00000296674;ENST00000512493
chr5:+:140855713-140857960	5	+	140855714	140857960	no.hit	PCDHGC3	ENSG00000240184	ENST00000308177
chr5:+:170815010-170832305	5	+	170815011	170832305	chr5:+:170815010-170817054;chr5:+:170815010-170817078;chr5:+:170815010-170818308;chr5:+:170827214-170832305;chr5:+:170827929-170832305	NPM1	ENSG00000181163	ENST00000517671;ENST00000351986;ENST00000393820
chr5:+:85915316-85916484	5	+	85915317	85916484	chr5:+:85915259-85916484;chr5:+:85915313-85916484;chr5:+:85915695-85916484	COX7C	ENSG00000127184	ENST00000247655;ENST00000511472;ENST00000515763
chr6:-:31237158-31237265	6	-	31237159	31237265	no.hit	HLA-C	ENSG00000204525	ENST00000466892;ENST00000376228
chr6:-:31322102-31322255	6	-	31322103	31322255	chr6:-:31322073-31322255	HLA-B	ENSG00000234745	ENST00000481849;ENST00000497377;ENST00000412585
chr6:-:31322299-31322405	6	-	31322300	31322405	no.hit	HLA-B	ENSG00000234745	ENST00000481849;ENST00000497377;ENST00000412585
chr6:-:31322303-31322883	6	-	31322304	31322883	chr6:-:31322303-31322409;chr6:-:31322442-31322883	HLA-B	ENSG00000234745	ENST00000412585
chr6:-:31323028-31323093	6	-	31323029	31323093	chr6:-:31323000-31323093	HLA-B	ENSG00000234745	ENST00000412585;ENST00000463574
chr6:-:3226917-3227720	6	-	3226918	3227720	chr6:-:3226903-3227720	TUBB2B	ENSG00000137285	ENST00000259818
chr6:-:33385863-33385978	6	-	33385864	33385978	no.hit	CUTA	ENSG00000112514	ENST00000374500
chr6:-:34392608-34392848	6	-	34392609	34392848	chr6:-:34392617-34392848	RPS10-NUDT3;RPS10	ENSG00000270800;ENSG00000124614	ENST00000605528;ENST00000326199
chr6:-:34392632-34392848	6	-	34392633	34392848	chr6:-:34392617-34392848	RPS10-NUDT3;RPS10	ENSG00000270800;ENSG00000124614	ENST00000605528;ENST00000326199
chr6:-:34392635-34392848	6	-	34392636	34392848	chr6:-:34392617-34392848	RPS10-NUDT3;RPS10	ENSG00000270800;ENSG00000124614	ENST00000605528;ENST00000326199
chr6:-:34392947-34393808	6	-	34392948	34393808	chr6:-:34392998-34393808	RPS10-NUDT3;RPS10	ENSG00000270800;ENSG00000124614	ENST00000605528;ENST00000326199
chr6:-:36462414-36464487	6	-	36462415	36464487	chr6:-:36463691-36464487	STK38	ENSG00000112079	ENST00000229812
chr6:-:44222798-44222912	6	-	44222799	44222912	no.hit	SLC35B2	ENSG00000157593	ENST00000393812
chr6:-:74227657-74227787	6	-	74227658	74227787	chr6:-:74227657-74227752	EEF1A1	ENSG00000156508	ENST00000309268;ENST00000490569;ENST00000331523
chr6:-:74227657-74227866	6	-	74227658	74227866	chr6:-:74227657-74227752	EEF1A1	ENSG00000156508	ENST00000309268;ENST00000490569;ENST00000331523
chr6:-:74228258-74228420	6	-	74228259	74228420	chr6:-:74228333-74228420	EEF1A1	ENSG00000156508	ENST00000309268;ENST00000490569;ENST00000331523
chr6:-:74228439-74229694	6	-	74228440	74229694	no.hit	EEF1A1	ENSG00000156508	ENST00000309268;ENST00000490569;ENST00000331523;ENST00000495333
chr6:-:74228951-74229605	6	-	74228952	74229605	chr6:-:74228951-74229059;chr6:-:74229239-74229605	EEF1A1	ENSG00000156508	ENST00000309268;ENST00000490569;ENST00000331523;ENST00000495333
chr6:+:133135921-133136156	6	+	133135922	133136156	chr6:+:133135921-133136110	RPS12	ENSG00000112306	ENST00000230050;ENST00000484616
chr6:+:133135921-133137599	6	+	133135922	133137599	chr6:+:133135921-133136110;chr6:+:133136227-133137599;chr6:+:133136363-133137599	RPS12	ENSG00000112306	ENST00000230050;ENST00000484616
chr6:+:29910803-29911898	6	+	29910804	29911898	chr6:+:29910803-29911044;chr6:+:29911320-29911898	HLA-A	ENSG00000206503	ENST00000376809;ENST00000496081
chr6:+:29911320-29912276	6	+	29911321	29912276	chr6:+:29911320-29911898;chr6:+:29912174-29912276	HLA-A	ENSG00000206503	ENST00000376809;ENST00000496081
chr6:+:29912144-29912276	6	+	29912145	29912276	chr6:+:29912174-29912276	HLA-A	ENSG00000206503	ENST00000376809;ENST00000496081
chr6:+:29912174-29912242	6	+	29912175	29912242	chr6:+:29912174-29912276;chr6:+:29912174-29913227	HLA-A	ENSG00000206503	ENST00000376809;ENST00000496081
chr6:+:30867067-30867299	6	+	30867068	30867299	no.hit	DDR1	ENSG00000204580	ENST00000376569;ENST00000446312;ENST00000376568;ENST00000452441
chr6:+:32411698-32412445	6	+	32411699	32412445	chr6:+:32411698-32412428	HLA-DRA	ENSG00000204287	ENST00000395388
chr6:+:33240503-33243741	6	+	33240504	33243741	chr6:+:33240503-33243276;chr6:+:33240503-33243573;chr6:+:33243660-33243741	RPS18	ENSG00000231500	ENST00000439602;ENST00000474973;ENST00000474626
chr6:+:33240517-33243587	6	+	33240518	33243587	no.hit	RPS18	ENSG00000231500	ENST00000439602;ENST00000474973;ENST00000474626
chr6:+:33243660-33243717	6	+	33243661	33243717	chr6:+:33243660-33243741	RPS18	ENSG00000231500	ENST00000439602;ENST00000474973;ENST00000474626
chr6:+:33243843-33244167	6	+	33243844	33244167	chr6:+:33243843-33243952;chr6:+:33244044-33244167	RPS18	ENSG00000231500	ENST00000439602;ENST00000474973;ENST00000474626
chr6:+:33377318-33377422	6	+	33377319	33377422	chr6:+:33374652-33377422	KIFC1	ENSG00000237649	ENST00000428849
chr6:+:35436373-35436575	6	+	35436374	35436575	chr6:+:35436216-35436575	RPL10A	ENSG00000198755	ENST00000322203;ENST00000467020
chr7:-:102306263-102306523	7	-	102306264	102306523	chr7:-:102281220-102306523	POLR2J2	ENSG00000267645	ENST00000476151
chr7:-:107791151-107796831	7	-	107791152	107796831	chr7:-:107791198-107796831	NRCAM	ENSG00000091129	ENST00000522550;ENST00000351718
chr7:-:10973309-10977716	7	-	10973310	10977716	chr7:-:10973319-10977716	NDUFA4	ENSG00000189043	ENST00000339600;ENST00000482299
chr7:-:10977797-10978434	7	-	10977798	10978434	chr7:-:10977774-10978434	NDUFA4	ENSG00000189043	ENST00000339600;ENST00000486007
chr7:-:136939721-136942488	7	-	136939722	136942488	chr7:-:136939721-137028184	PTN	ENSG00000105894	ENST00000348225
chr7:-:136939721-137000161	7	-	136939722	137000161	chr7:-:136939721-137028184	PTN	ENSG00000105894	ENST00000348225
chr7:-:136942620-137028184	7	-	136942621	137028184	chr7:-:136939721-137028184	PTN	ENSG00000105894	ENST00000348225
chr7:-:137000328-137028184	7	-	137000329	137028184	chr7:-:136939721-137028184	PTN	ENSG00000105894	ENST00000348225
chr7:-:140154208-140154258	7	-	140154209	140154258	no.hit	MKRN1	ENSG00000133606	ENST00000255977
chr7:-:34977729-34978887	7	-	34977730	34978887	chr7:-:34971341-34978887;chr7:-:34977731-34978887	DPY19L1	ENSG00000173852	ENST00000310974
chr7:-:54820113-54820722	7	-	54820114	54820722	chr7:-:54820113-54823471	SEC61G	ENSG00000132432	ENST00000395535;ENST00000352861
chr7:-:54820113-54823473	7	-	54820114	54823473	chr7:-:54820113-54823471	SEC61G	ENSG00000132432	ENST00000395535;ENST00000352861
chr7:-:54820113-54825187	7	-	54820114	54825187	chr7:-:54820113-54823471;chr7:-:54823574-54825187	SEC61G	ENSG00000132432	ENST00000395535;ENST00000352861
chr7:-:54820958-54823471	7	-	54820959	54823471	chr7:-:54820113-54823471	SEC61G	ENSG00000132432	ENST00000395535;ENST00000352861
chr7:-:54823574-54823982	7	-	54823575	54823982	chr7:-:54823574-54825187;chr7:-:54823574-54826850	SEC61G	ENSG00000132432	ENST00000395535;ENST00000352861
chr7:-:54823574-54825313	7	-	54823575	54825313	chr7:-:54823574-54825187;chr7:-:54823574-54826850	SEC61G	ENSG00000132432	ENST00000395535;ENST00000352861
chr7:-:54824318-54825187	7	-	54824319	54825187	chr7:-:54823574-54825187	SEC61G	ENSG00000132432	ENST00000395535;ENST00000352861
chr7:-:54825287-54826448	7	-	54825288	54826448	chr7:-:54825287-54826730;chr7:-:54825287-54826850;chr7:-:54825287-54826854	SEC61G	ENSG00000132432	ENST00000395535;ENST00000352861
chr7:-:5567554-5567634	7	-	5567555	5567634	chr7:-:5567522-5567634	ACTB	ENSG00000075624	ENST00000331789;ENST00000462494;ENST00000493945
chr7:-:5569315-5570154	7	-	5569316	5570154	chr7:-:5568350-5570154;chr7:-:5569294-5570154;chr7:-:5569364-5570154	ACTB	ENSG00000075624	ENST00000331789;ENST00000462494;ENST00000484841;ENST00000477812
chr7:-:56170701-56171918	7	-	56170702	56171918	chr7:-:56170704-56171918	CHCHD2	ENSG00000106153	ENST00000395422
chr7:-:56170704-56174056	7	-	56170705	56174056	chr7:-:56170704-56171918;chr7:-:56172168-56174056	CHCHD2	ENSG00000106153	ENST00000395422
chr7:-:56172168-56173961	7	-	56172169	56173961	chr7:-:56172168-56174056	CHCHD2	ENSG00000106153	ENST00000395422
chr7:+:100210447-100210598	7	+	100210448	100210598	no.hit	MOSPD3	ENSG00000106330	ENST00000393950
chr7:+:121651363-121652173	7	+	121651364	121652173	chr7:+:121651363-121652875;chr7:+:121651363-121659177	PTPRZ1	ENSG00000106278	ENST00000393386;ENST00000449182
chr7:+:121682785-121684475	7	+	121682786	121684475	chr7:+:121682797-121684475	PTPRZ1	ENSG00000106278	ENST00000393386;ENST00000449182
chr7:+:121694092-121694998	7	+	121694093	121694998	chr7:+:121694092-121694994	PTPRZ1	ENSG00000106278	ENST00000393386;ENST00000449182
chr7:+:121699894-121701133	7	+	121699895	121701133	chr7:+:121699942-121701133	PTPRZ1	ENSG00000106278	ENST00000393386;ENST00000449182;ENST00000474500
chr7:+:30962259-30963138	7	+	30962260	30963138	chr7:+:30962259-30963064	AQP1	ENSG00000240583	ENST00000311813
chr7:+:43992290-43992703	7	+	43992291	43992703	no.hit	UBE2D4	ENSG00000078967	ENST00000222402;ENST00000440652
chr7:+:44153228-44153428	7	+	44153229	44153428	no.hit	AEBP1	ENSG00000106624	ENST00000223357;ENST00000450684;ENST00000413907
chr7:+:44836392-44840885	7	+	44836393	44840885	chr7:+:44836392-44838346;chr7:+:44836392-44838845;chr7:+:44839473-44840885;chr7:+:44840142-44840885	PPIA	ENSG00000196262	ENST00000468812;ENST00000489459;ENST00000355968;ENST00000415933
chr7:+:44839473-44840898	7	+	44839474	44840898	chr7:+:44839473-44840022;chr7:+:44839473-44840885	PPIA	ENSG00000196262	ENST00000468812;ENST00000489459;ENST00000355968;ENST00000415933
chr7:+:55499016-55501075	7	+	55499017	55501075	no.hit	LANCL2	ENSG00000132434	ENST00000254770
chr7:+:73467570-73467600	7	+	73467571	73467600	no.hit	ELN	ENSG00000049540	ENST00000357036;ENST00000380576
chr7:+:75932393-75933123	7	+	75932394	75933123	chr7:+:75932393-75933118	HSPB1	ENSG00000106211	ENST00000248553;ENST00000447574
chr7:+:75932393-75933300	7	+	75932394	75933300	chr7:+:75932393-75933118;chr7:+:75933182-75933300	HSPB1	ENSG00000106211	ENST00000248553;ENST00000447574
chr8:-:11700400-11701224	8	-	11700401	11701224	no.hit	CTSB	ENSG00000164733	ENST00000353047
chr8:-:146015811-146016661	8	-	146015812	146016661	chr8:-:146015855-146016661;chr8:-:146016148-146016661	RPL8	ENSG00000161016	ENST00000531975;ENST00000529163;ENST00000526668;ENST00000394920;ENST00000262584;ENST00000533397;ENST00000532702
chr8:-:27455697-27455719	8	-	27455698	27455719	no.hit	CLU	ENSG00000120885	ENST00000316403;ENST00000405140;ENST00000523500;ENST00000522299;ENST00000521770
chr8:-:27456052-27457296	8	-	27456053	27457296	chr8:-:27456152-27457296	CLU	ENSG00000120885	ENST00000316403;ENST00000405140;ENST00000523500;ENST00000522299;ENST00000521770
chr8:-:27456152-27456331	8	-	27456153	27456331	chr8:-:27456152-27457296	CLU	ENSG00000120885	ENST00000316403;ENST00000405140;ENST00000523500;ENST00000522299;ENST00000521770;ENST00000522098
chr8:-:27456478-27457296	8	-	27456479	27457296	chr8:-:27456152-27457296	CLU	ENSG00000120885	ENST00000316403;ENST00000405140;ENST00000523500;ENST00000522299;ENST00000521770;ENST00000522098
chr8:-:27457526-27462440	8	-	27457527	27462440	chr8:-:27457526-27461807;chr8:-:27461912-27462440	CLU	ENSG00000120885	ENST00000316403;ENST00000405140;ENST00000523500;ENST00000522299;ENST00000522098
chr8:-:27462738-27463870	8	-	27462739	27463870	chr8:-:27462852-27463870	CLU	ENSG00000120885	ENST00000316403;ENST00000405140;ENST00000523500;ENST00000522299;ENST00000523589;ENST00000560566;ENST00000520796
chr8:-:27462852-27463473	8	-	27462853	27463473	chr8:-:27462852-27463870	CLU	ENSG00000120885	ENST00000316403;ENST00000405140;ENST00000523500;ENST00000522299;ENST00000523589;ENST00000560566;ENST00000520796
chr8:-:27462852-27463882	8	-	27462853	27463882	chr8:-:27462852-27463870	CLU	ENSG00000120885	ENST00000316403;ENST00000405140;ENST00000523500;ENST00000522299;ENST00000523589;ENST00000560566;ENST00000520796
chr8:-:27462852-27466454	8	-	27462853	27466454	chr8:-:27462852-27463870;chr8:-:27464041-27466454	CLU	ENSG00000120885	ENST00000316403;ENST00000405140;ENST00000523500;ENST00000522299;ENST00000523589;ENST00000560566;ENST00000520796
chr8:-:27464041-27466585	8	-	27464042	27466585	chr8:-:27464041-27466454	CLU	ENSG00000120885	ENST00000316403;ENST00000405140;ENST00000523500;ENST00000522299;ENST00000523589;ENST00000560566;ENST00000520796
chr8:-:27464041-27467991	8	-	27464042	27467991	chr8:-:27464041-27466454;chr8:-:27466603-27467991	CLU	ENSG00000120885	ENST00000316403;ENST00000405140;ENST00000523500;ENST00000522299;ENST00000523589;ENST00000560566;ENST00000520796
chr8:-:27467718-27467991	8	-	27467719	27467991	chr8:-:27466603-27467991	CLU	ENSG00000120885	ENST00000316403;ENST00000405140;ENST00000523500;ENST00000522299;ENST00000523589;ENST00000560566;ENST00000520796;ENST00000518050;ENST00000519472
chr8:-:27468105-27472171	8	-	27468106	27472171	chr8:-:27468117-27472171;chr8:-:27471200-27472171;chr8:-:27471887-27472171	CLU	ENSG00000120885	ENST00000316403;ENST00000522299;ENST00000523589;ENST00000518050;ENST00000519472
chr8:-:74204631-74204923	8	-	74204632	74204923	chr8:-:74204640-74204923	RPL7	ENSG00000147604	ENST00000352983;ENST00000396466
chr8:-:99057310-99057574	8	-	99057311	99057574	chr8:-:99055003-99057574;chr8:-:99057316-99057574	RPL30	ENSG00000156482	ENST00000521291;ENST00000396070;ENST00000518850;ENST00000287038;ENST00000517489
chr8:-:99057627-99057739	8	-	99057628	99057739	chr8:-:99057627-99057735	RPL30	ENSG00000156482	ENST00000521291;ENST00000396070;ENST00000518850;ENST00000287038;ENST00000517489
chr8:+:98708521-98711981	8	+	98708522	98711981	chr8:+:98703416-98711981	MTDH	ENSG00000147649	ENST00000336273
chr8:+:99045404-99045792	8	+	99045405	99045792	chr8:+:99045404-99045788	MATN2	ENSG00000132561	ENST00000518154
chr9:-:113013144-113013711	9	-	113013145	113013711	no.hit	TXN	ENSG00000136810	ENST00000374517
chr9:-:127622543-127623406	9	-	127622544	127623406	chr9:-:127622543-127623697	RPL35	ENSG00000136942	ENST00000348462
chr9:-:130211987-130213559	9	-	130211988	130213559	chr9:-:130211987-130213009;chr9:-:130213083-130213559	RPL12	ENSG00000197958	ENST00000361436;ENST00000497825
chr9:-:131397509-131397936	9	-	131397510	131397936	chr9:-:131397538-131397936	WDR34	ENSG00000119333	ENST00000372715
chr9:-:131483679-131483929	9	-	131483680	131483929	chr9:-:131483759-131483929;chr9:-:131483781-131483929;chr9:-:131483809-131483929	ZDHHC12	ENSG00000160446	ENST00000372663
chr9:-:19376383-19376491	9	-	19376384	19376491	chr9:-:19376386-19376491	RPS6	ENSG00000137154	ENST00000380394;ENST00000315377
chr9:-:19376587-19378365	9	-	19376588	19378365	chr9:-:19376649-19378365	RPS6	ENSG00000137154	ENST00000380394;ENST00000315377
chr9:-:19378916-19379460	9	-	19378917	19379460	chr9:-:19378916-19379484	RPS6	ENSG00000137154	ENST00000380394;ENST00000315377;ENST00000380381
chr9:+:139875307-139876009	9	+	139875308	139876009	chr9:+:139875307-139876030	PTGDS	ENSG00000107317	ENST00000371625
chr9:+:75780125-75782412	9	+	75780126	75782412	chr9:+:75780125-75781012;chr9:+:75781108-75782412	ANXA1	ENSG00000135046	ENST00000257497
chrX:-:118923962-118925536	X	-	118923963	118925536	chrX:-:118923974-118925536	RPL39	ENSG00000198918	ENST00000361575
chrX:-:119393814-119402098	X	-	119393815	119402098	chrX:-:119394883-119402098	TMEM255A	ENSG00000125355	ENST00000371369
chrX:-:69506618-69506835	X	-	69506619	69506835	no.hit	PDZD11	ENSG00000120509	ENST00000239666
chrX:-:71493717-71494902	X	-	71493718	71494902	chrX:-:71493822-71494902;chrX:-:71494285-71494902	RPS4X	ENSG00000198034	ENST00000316084
chrX:+:12994480-12994906	X	+	12994481	12994906	chrX:+:12994480-12994895	TMSB4X	ENSG00000205542	ENST00000451311;ENST00000380636
chrX:+:12994480-12994998	X	+	12994481	12994998	chrX:+:12994480-12994895	TMSB4X	ENSG00000205542	ENST00000451311;ENST00000380636
chrX:+:153627737-153627835	X	+	153627738	153627835	chrX:+:153627737-153627827	RPL10	ENSG00000147403	ENST00000436473;ENST00000491035;ENST00000458500;ENST00000467168;ENST00000406022
chrX:+:2656297-2658824	X	+	2656298	2658824	chrX:+:2656297-2658819	CD99	ENSG00000002586	ENST00000381192;ENST00000381187
chrX:+:47444695-47444941	X	+	47444696	47444941	chrX:+:47444730-47444941	TIMP1	ENSG00000102265	ENST00000218388;ENST00000377017
chrX:+:70384178-70389103	X	+	70384179	70389103	chrX:+:70384178-70386860;chrX:+:70387650-70389103	NLGN3	ENSG00000196338	ENST00000536169;ENST00000374051;ENST00000476589

## Sheet: KICH
junc.id	chr	strand	int.start	int.end	canonical	symbol	ensg	enst
chr1:-:150970707-150971844	1	-	150970708	150971844	chr1:-:150970749-150971844	FAM63A	ENSG00000143409	ENST00000361936
chr1:-:150970719-150971844	1	-	150970720	150971844	chr1:-:150970749-150971844	FAM63A	ENSG00000143409	ENST00000361936
chr1:-:150974799-150975059	1	-	150974800	150975059	chr1:-:150974799-150978787	FAM63A	ENSG00000143409	ENST00000361936
chr1:-:169435162-169437348	1	-	169435163	169437348	chr1:-:169435215-169437348	SLC19A2	ENSG00000117479	ENST00000236137
chr1:-:182571616-182572363	1	-	182571617	182572363	chr1:-:182571619-182572363	RGS16	ENSG00000143333	ENST00000367558
chr1:-:20009932-20020926	1	-	20009933	20020926	chr1:-:20009937-20020926	TMCO4	ENSG00000162542	ENST00000294543
chr1:-:20116541-20124629	1	-	20116542	20124629	chr1:-:20113610-20124629	TMCO4	ENSG00000162542	ENST00000294543
chr1:-:27278903-27280336	1	-	27278904	27280336	chr1:-:27278903-27286840	C1orf172	ENSG00000175707	ENST00000320567
chr1:-:6253108-6257711	1	-	6253109	6257711	chr1:-:6253114-6257711	RPL22	ENSG00000116251	ENST00000234875;ENST00000471204
chr1:-:71328080-71419445	1	-	71328081	71419445	chr1:-:71318542-71419445;chr1:-:71328080-71331371;chr1:-:71328080-71334926;chr1:-:71331516-71419445;chr1:-:71335002-71419445;chr1:-:71352011-71419445;chr1:-:71418742-71419445	PTGER3	ENSG00000050628	ENST00000370931;ENST00000460330
chr1:-:8921480-8922945	1	-	8921481	8922945	chr1:-:8921488-8922945	ENO1	ENSG00000074800	ENST00000234590
chr1:+:15481641-15536985	1	+	15481642	15536985	chr1:+:15479280-15536985;chr1:+:15480450-15536985	TMEM51	ENSG00000171729	ENST00000428417;ENST00000376014;ENST00000376008
chr1:+:15500656-15536985	1	+	15500657	15536985	chr1:+:15479280-15536985;chr1:+:15480450-15536985	TMEM51	ENSG00000171729	ENST00000428417;ENST00000376014;ENST00000376008
chr1:+:156339227-156348042	1	+	156339228	156348042	chr1:+:156339227-156340972;chr1:+:156339227-156344397;chr1:+:156339227-156347091;chr1:+:156339227-156351137;chr1:+:156347931-156348042	RHBG	ENSG00000132677	ENST00000537040
chr1:+:156341045-156347153	1	+	156341046	156347153	chr1:+:156341045-156347091	RHBG	ENSG00000132677	ENST00000537040
chr1:+:156341045-156348122	1	+	156341046	156348122	chr1:+:156341045-156347091	RHBG	ENSG00000132677	ENST00000537040
chr1:+:156341045-156351137	1	+	156341046	156351137	chr1:+:156339227-156351137;chr1:+:156341045-156347091;chr1:+:156348190-156351137	RHBG	ENSG00000132677	ENST00000537040
chr1:+:156347278-156348122	1	+	156347279	156348122	chr1:+:156347278-156347780	RHBG	ENSG00000132677	ENST00000537040
chr1:+:156348190-156352538	1	+	156348191	156352538	chr1:+:156348190-156351137;chr1:+:156351992-156352538	RHBG	ENSG00000132677	ENST00000537040
chr1:+:181019422-181021457	1	+	181019423	181021457	chr1:+:181019422-181021370;chr1:+:181019422-181022708;chr1:+:181019422-181024360	MR1	ENSG00000153029	ENST00000282990
chr1:+:202509008-202531905	1	+	202509009	202531905	chr1:+:202528021-202531905	PPP1R12B	ENSG00000077157	ENST00000391959
chr1:+:202509369-202531905	1	+	202509370	202531905	chr1:+:202528021-202531905	PPP1R12B	ENSG00000077157	ENST00000391959
chr1:+:20915776-20940334	1	+	20915777	20940334	chr1:+:20915776-20931420;chr1:+:20931532-20940334	CDA	ENSG00000158825	ENST00000375071
chr1:+:20915776-20944944	1	+	20915777	20944944	chr1:+:20915776-20931420;chr1:+:20931532-20944944;chr1:+:20940392-20944944	CDA	ENSG00000158825	ENST00000375071
chr1:+:214486059-214488104	1	+	214486060	214488104	chr1:+:214454770-214488104;chr1:+:214478593-214488104	SMYD2	ENSG00000143499	ENST00000366957
chr1:+:224553693-224559031	1	+	224553694	224559031	chr1:+:224553693-224558984;chr1:+:224553693-224563496;chr1:+:224553693-224566770	CNIH4	ENSG00000143771	ENST00000366856
chr1:+:2488877-2489164	1	+	2488878	2489164	chr1:+:2488172-2489164	TNFRSF14	ENSG00000157873	ENST00000355716
chr1:+:26013027-26066560	1	+	26013028	26066560	chr1:+:26013027-26073158	MAN1C1	ENSG00000117643	ENST00000263979
chr1:+:32667700-32669484	1	+	32667701	32669484	chr1:+:32667700-32667821;chr1:+:32667700-32669479	CCDC28B	ENSG00000160050	ENST00000373602;ENST00000461819
chr1:+:41162429-41204507	1	+	41162430	41204507	chr1:+:41157539-41204507;chr1:+:41158019-41204507;chr1:+:41175288-41204507;chr1:+:41178493-41204507;chr1:+:41189464-41204507;chr1:+:41201422-41204507	NFYC	ENSG00000066136	ENST00000447388
chr1:+:45243801-45244263	1	+	45243802	45244263	chr1:+:45243801-45244247	RPS8	ENSG00000142937	ENST00000396651;ENST00000372209
chr1:+:46774799-46775572	1	+	46774800	46775572	chr1:+:46774799-46775568;chr1:+:46774799-46775826	UQCRH	ENSG00000173660	ENST00000311672;ENST00000496387
chr1:+:55466609-55470694	1	+	55466610	55470694	chr1:+:55465036-55470694	BSND	ENSG00000162399	ENST00000371265
chr1:+:93300470-93301757	1	+	93300471	93301757	chr1:+:93300470-93301746	RPL5	ENSG00000122406	ENST00000370321
chr1:+:93301949-93303045	1	+	93301950	93303045	chr1:+:93301949-93303012	RPL5	ENSG00000122406	ENST00000370321
chr10:-:125506062-125506412	10	-	125506063	125506412	no.hit	CPXM2	ENSG00000121898	ENST00000241305
chr10:-:125512182-125514178	10	-	125512183	125514178	chr10:-:125506533-125514178	CPXM2	ENSG00000121898	ENST00000241305
chr10:-:125536264-125539682	10	-	125536265	125539682	chr10:-:125530555-125539682	CPXM2	ENSG00000121898	ENST00000241305
chr10:-:125617218-125622129	10	-	125617219	125622129	chr10:-:125602004-125622129	CPXM2	ENSG00000121898	ENST00000241305
chr10:-:50957856-50958884	10	-	50957857	50958884	chr10:-:50957862-50958884	OGDHL	ENSG00000197444	ENST00000374103;ENST00000432695
chr10:-:7605342-7607992	10	-	7605343	7607992	chr10:-:7605347-7607992	ITIH5	ENSG00000123243	ENST00000397146
chr10:-:7628032-7651382	10	-	7628033	7651382	chr10:-:7628032-7642491;chr10:-:7628032-7657944;chr10:-:7642528-7651382	ITIH5	ENSG00000123243	ENST00000397146
chr10:-:81915664-81917396	10	-	81915665	81917396	chr10:-:81915668-81917396;chr10:-:81916254-81917396	ANXA11	ENSG00000122359	ENST00000422982;ENST00000463340
chr10:-:99683157-99695697	10	-	99683158	99695697	chr10:-:99683157-99695926	CRTAC1	ENSG00000095713	ENST00000413387;ENST00000370597
chr10:+:4988544-4991954	10	+	4988545	4991954	no.hit	AKR1C1	ENSG00000187134	ENST00000434459
chr10:+:4995090-5005453	10	+	4995091	5005453	chr10:+:4995183-5005453	AKR1C1	ENSG00000187134	ENST00000434459
chr10:+:60029064-60036957	10	+	60029065	60036957	chr10:+:60029064-60035877;chr10:+:60029064-60036876	CISD1	ENSG00000122873	ENST00000333926
chr11:-:117690997-117691380	11	-	117690998	117691380	chr11:-:117691087-117691380;chr11:-:117691087-117691380	FXYD2	ENSG00000137731	ENST00000528014;ENST00000292079;ENST00000260287;ENST00000534383
chr11:-:117690997-117691380	11	-	117690998	117691380	chr11:-:117691087-117691380;chr11:-:117691087-117691380	FXYD2	ENSG00000137731	ENST00000528014;ENST00000292079;ENST00000260287;ENST00000534383
chr11:-:117690997-117691380	11	-	117690998	117691380	chr11:-:117691087-117691380;chr11:-:117691087-117691380	FXYD2	ENSG00000137731	ENST00000528014;ENST00000292079;ENST00000260287;ENST00000534383
chr11:-:117690997-117691380	11	-	117690998	117691380	chr11:-:117691087-117691380;chr11:-:117691087-117691380	FXYD2	ENSG00000137731	ENST00000528014;ENST00000292079;ENST00000260287;ENST00000534383
chr11:-:117694936-117695368	11	-	117694937	117695368	chr11:-:117693432-117695368	FXYD2	ENSG00000137731	ENST00000528014;ENST00000292079;ENST00000260287;ENST00000534383;ENST00000533281;ENST00000317594
chr11:-:130750701-130764497	11	-	130750702	130764497	chr11:-:130750701-130762645;chr11:-:130750701-130763658;chr11:-:130750701-130773149	SNX19	ENSG00000120451	ENST00000265909
chr11:-:14993689-14993790	11	-	14993690	14993790	chr11:-:14992747-14993790	CALCA	ENSG00000110680	ENST00000331587
chr11:-:30517068-30601792	11	-	30517069	30601792	chr11:-:30517068-30526282;chr11:-:30517068-30557540;chr11:-:30557722-30601792	MPPED2	ENSG00000066382	ENST00000358117
chr11:-:57095356-57095776	11	-	57095357	57095776	chr11:-:57095356-57095770	SSRP1	ENSG00000149136	ENST00000278412
chr11:-:62490179-62490284	11	-	62490180	62490284	chr11:-:62490185-62490284	HNRNPUL2-BSCL2;HNRNPUL2	ENSG00000234857;ENSG00000214753	ENST00000403734;ENST00000301785
chr11:-:64084837-64084962	11	-	64084838	64084962	chr11:-:64084837-64084920	TRMT112	ENSG00000173113	ENST00000544844;ENST00000308774;ENST00000539854
chr11:-:64889261-64889561	11	-	64889262	64889561	chr11:-:64889293-64889561	FAU	ENSG00000149806	ENST00000529639;ENST00000527548;ENST00000279259
chr11:-:71747021-71751365	11	-	71747022	71751365	chr11:-:71747021-71750780;chr11:-:71747021-71751650;chr11:-:71747021-71752004;chr11:-:71747021-71752473;chr11:-:71747021-71752767;chr11:-:71747021-71752868;chr11:-:71747021-71760464;chr11:-:71747021-71761707;chr11:-:71747021-71773634;chr11:-:71747021-71779124;chr11:-:71747021-71779150;chr11:-:71747021-71779541;chr11:-:71747021-71780887;chr11:-:71747021-71791503	NUMA1	ENSG00000137497	ENST00000393695
chr11:-:72412826-72413949	11	-	72412827	72413949	chr11:-:72412828-72413949	ARAP1	ENSG00000186635	ENST00000455638;ENST00000334211
chr11:-:72470426-72470606	11	-	72470427	72470606	chr11:-:72470426-72492019;chr11:-:72470426-72492106;chr11:-:72470426-72492157	STARD10	ENSG00000214530	ENST00000543304;ENST00000538437;ENST00000537947;ENST00000546314
chr11:-:73471904-73472002	11	-	73471905	73472002	no.hit	RAB6A	ENSG00000175582	ENST00000310653;ENST00000336083
chr11:-:77103583-77184596	11	-	77103584	77184596	chr11:-:77103583-77108071;chr11:-:77103586-77184596;chr11:-:77166982-77184596	PAK1	ENSG00000149269	ENST00000356341
chr11:-:77991947-78022996	11	-	77991948	78022996	chr11:-:77991947-78029188;chr11:-:77991947-78052805	GAB2	ENSG00000033327	ENST00000340149
chr11:-:77991947-78023078	11	-	77991948	78023078	chr11:-:77991947-78029188;chr11:-:77991947-78052805	GAB2	ENSG00000033327	ENST00000340149
chr11:-:86356987-86382803	11	-	86356988	86382803	chr11:-:86270865-86382803;chr11:-:86379284-86382803	ME3	ENSG00000151376	ENST00000393324
chr11:+:10515027-10516454	11	+	10515028	10516454	no.hit	AMPD3	ENSG00000133805	ENST00000396553
chr11:+:10519983-10521632	11	+	10519984	10521632	chr11:+:10518485-10521632;chr11:+:10519983-10520791;chr11:+:10520903-10521632	AMPD3	ENSG00000133805	ENST00000396553
chr11:+:111915954-111921957	11	+	111915955	111921957	chr11:+:111915954-111916586;chr11:+:111916694-111921957	DLAT	ENSG00000150768	ENST00000533297;ENST00000393051
chr11:+:11958057-11959806	11	+	11958058	11959806	chr11:+:11958057-11959803	USP47	ENSG00000170242	ENST00000527733
chr11:+:121163525-121174109	11	+	121163526	121174109	chr11:+:121163525-121174074	SC5D	ENSG00000109929	ENST00000264027;ENST00000534230
chr11:+:121495986-121498269	11	+	121495987	121498269	chr11:+:121495986-121498263	SORL1	ENSG00000137642	ENST00000260197
chr11:+:126146418-126146968	11	+	126146419	126146968	chr11:+:126146418-126146892;chr11:+:126146418-126146965	FOXRED1	ENSG00000110074	ENST00000263578
chr11:+:126197524-126198639	11	+	126197525	126198639	no.hit	DCPS	ENSG00000110063	ENST00000263579
chr11:+:126197858-126200088	11	+	126197859	126200088	no.hit	DCPS	ENSG00000110063	ENST00000263579
chr11:+:126197858-126201299	11	+	126197859	126201299	chr11:+:126176639-126201299	DCPS	ENSG00000110063	ENST00000263579
chr11:+:126197952-126198639	11	+	126197953	126198639	no.hit	DCPS	ENSG00000110063	ENST00000263579
chr11:+:126197952-126200088	11	+	126197953	126200088	no.hit	DCPS	ENSG00000110063	ENST00000263579
chr11:+:126198029-126198639	11	+	126198030	126198639	no.hit	DCPS	ENSG00000110063	ENST00000263579
chr11:+:126198783-126201299	11	+	126198784	126201299	chr11:+:126176639-126201299	DCPS	ENSG00000110063	ENST00000263579
chr11:+:126199461-126200088	11	+	126199462	126200088	no.hit	DCPS	ENSG00000110063	ENST00000263579
chr11:+:126201079-126201299	11	+	126201080	126201299	chr11:+:126176639-126201299	DCPS	ENSG00000110063	ENST00000263579
chr11:+:126229987-126275990	11	+	126229988	126275990	chr11:+:126225737-126275990;chr11:+:126226197-126275990;chr11:+:126228406-126275990;chr11:+:126245019-126275990;chr11:+:126262249-126275990;chr11:+:126263198-126275990;chr11:+:126273322-126275990;chr11:+:126273381-126275990;chr11:+:126275594-126275990	ST3GAL4	ENSG00000110080	ENST00000444328;ENST00000534083
chr11:+:18427119-18428720	11	+	18427120	18428720	chr11:+:18427119-18428663	LDHA	ENSG00000134333	ENST00000430553;ENST00000545215;ENST00000379412
chr11:+:2591928-2593242	11	+	2591929	2593242	chr11:+:2592633-2593242	KCNQ1	ENSG00000053918	ENST00000155840
chr11:+:30344749-30354412	11	+	30344750	30354412	chr11:+:30344749-30352432;chr11:+:30352921-30354412;chr11:+:30353347-30354412	ARL14EP	ENSG00000152219	ENST00000282032
chr11:+:34988358-34991685	11	+	34988359	34991685	chr11:+:34988361-34991685	PDHX	ENSG00000110435	ENST00000227868
chr11:+:44609106-44616196	11	+	44609107	44616196	chr11:+:44609106-44609259;chr11:+:44609106-44616192	CD82	ENSG00000085117	ENST00000227155
chr11:+:45949144-45949557	11	+	45949145	45949557	chr11:+:45949144-45949299;chr11:+:45949144-45949470	GYLTL1B	ENSG00000165905	ENST00000529052
chr11:+:57506511-57506661	11	+	57506512	57506661	chr11:+:57506511-57506602	TMX2	ENSG00000213593	ENST00000378312;ENST00000278422
chr11:+:62439337-62439499	11	+	62439338	62439499	chr11:+:62439337-62439424	C11orf83	ENSG00000204922	ENST00000377953
chr11:+:64010334-64010670	11	+	64010335	64010670	chr11:+:64010030-64010670	FKBP2	ENSG00000173486	ENST00000309366;ENST00000449942;ENST00000394540
chr11:+:64882280-64882384	11	+	64882281	64882384	chr11:+:64882304-64882384	TM7SF2	ENSG00000149809	ENST00000279263
chr11:+:67351640-67351967	11	+	67351641	67351967	chr11:+:67351640-67351934	GSTP1	ENSG00000084207	ENST00000398606
chr11:+:68343502-68350510	11	+	68343503	68350510	chr11:+:68343511-68350510	PPP6R3	ENSG00000110075	ENST00000393800
chr11:+:70208594-70218317	11	+	70208595	70218317	chr11:+:70208594-70211478;chr11:+:70208594-70218320;chr11:+:70212073-70218317	PPFIA1	ENSG00000131626	ENST00000253925
chr11:+:71936210-71936493	11	+	71936211	71936493	chr11:+:71936210-71939233	INPPL1	ENSG00000165458	ENST00000298229
chr11:+:71936584-71939233	11	+	71936585	71939233	chr11:+:71936210-71939233	INPPL1	ENSG00000165458	ENST00000298229
chr11:+:73571054-73574221	11	+	73571055	73574221	chr11:+:73571054-73574216	MRPL48	ENSG00000175581	ENST00000544819
chr11:+:7642258-7649515	11	+	7642259	7649515	chr11:+:7642258-7647007;chr11:+:7647122-7649515	PPFIBP2	ENSG00000166387	ENST00000299492;ENST00000533792
chr11:+:7656824-7660967	11	+	7656825	7660967	chr11:+:7656824-7660962	PPFIBP2	ENSG00000166387	ENST00000299492;ENST00000533792
chr12:-:112369631-112371689	12	-	112369632	112371689	chr12:-:112369631-112370389;chr12:-:112370463-112371689;chr12:-:112370535-112371689	TMEM116	ENSG00000198270	ENST00000550831
chr12:-:112381115-112429561	12	-	112381116	112429561	chr12:-:112376014-112429561;chr12:-:112381173-112429561;chr12:-:112403563-112429561;chr12:-:112416591-112429561	TMEM116	ENSG00000198270	ENST00000550831
chr12:-:112381173-112388191	12	-	112381174	112388191	chr12:-:112381173-112403398;chr12:-:112381173-112416539;chr12:-:112381173-112429561	TMEM116	ENSG00000198270	ENST00000550831
chr12:-:112443477-112443752	12	-	112443478	112443752	chr12:-:112443107-112443752;chr12:-:112443490-112443752	TMEM116	ENSG00000198270	ENST00000550831
chr12:-:112443490-112443747	12	-	112443491	112443747	chr12:-:112443107-112443747;chr12:-:112443490-112443752	TMEM116	ENSG00000198270	ENST00000550831
chr12:-:118627746-118636828	12	-	118627747	118636828	chr12:-:118627746-118627987;chr12:-:118627746-118628048;chr12:-:118627746-118636855	TAOK3	ENSG00000135090	ENST00000392533
chr12:-:122803895-122806660	12	-	122803896	122806660	chr12:-:122803895-122812493	CLIP1	ENSG00000130779	ENST00000361654;ENST00000302528
chr12:-:122865105-122901873	12	-	122865106	122901873	chr12:-:122865105-122879936;chr12:-:122865105-122884327;chr12:-:122865105-122884678;chr12:-:122865105-122907067	CLIP1	ENSG00000130779	ENST00000361654
chr12:-:122902010-122907067	12	-	122902011	122907067	chr12:-:122865105-122907067;chr12:-:122884790-122907067	CLIP1	ENSG00000130779	ENST00000361654
chr12:-:125396954-125397129	12	-	125396955	125397129	no.hit	UBC	ENSG00000150991	ENST00000538617;ENST00000339647
chr12:-:125397129-125398103	12	-	125397130	125398103	no.hit	UBC	ENSG00000150991	ENST00000538617;ENST00000339647
chr12:-:125397182-125397357	12	-	125397183	125397357	no.hit	UBC	ENSG00000150991	ENST00000538617;ENST00000339647
chr12:-:125397302-125397377	12	-	125397303	125397377	no.hit	UBC	ENSG00000150991	ENST00000538617;ENST00000339647
chr12:-:125397410-125397813	12	-	125397411	125397813	no.hit	UBC	ENSG00000150991	ENST00000538617;ENST00000339647
chr12:-:125397530-125397833	12	-	125397531	125397833	no.hit	UBC	ENSG00000150991	ENST00000538617;ENST00000339647
chr12:-:125397574-125397833	12	-	125397575	125397833	no.hit	UBC	ENSG00000150991	ENST00000538617;ENST00000339647
chr12:-:13142345-13152858	12	-	13142346	13152858	no.hit	HEBP1	ENSG00000013583	ENST00000014930
chr12:-:15067712-15068422	12	-	15067713	15068422	chr12:-:15067716-15068422	ERP27	ENSG00000139055	ENST00000266397;ENST00000540097
chr12:-:15070214-15073865	12	-	15070215	15073865	chr12:-:15070237-15073865	ERP27	ENSG00000139055	ENST00000266397;ENST00000540097
chr12:-:15070293-15073865	12	-	15070294	15073865	chr12:-:15070237-15073865	ERP27	ENSG00000139055	ENST00000266397;ENST00000540097
chr12:-:15073978-15087789	12	-	15073979	15087789	chr12:-:15073982-15087789	ERP27	ENSG00000139055	ENST00000266397
chr12:-:15087927-15088016	12	-	15087928	15088016	chr12:-:15087927-15090885	ERP27	ENSG00000139055	ENST00000266397
chr12:-:15784492-15793636	12	-	15784493	15793636	chr12:-:15784598-15793636	EPS8	ENSG00000151491	ENST00000543468;ENST00000543523;ENST00000281172
chr12:-:15803935-15807078	12	-	15803936	15807078	chr12:-:15803940-15807078	EPS8	ENSG00000151491	ENST00000543468;ENST00000543523;ENST00000281172
chr12:-:15811519-15811891	12	-	15811520	15811891	chr12:-:15811519-15813547	EPS8	ENSG00000151491	ENST00000543468;ENST00000543523;ENST00000281172
chr12:-:15866259-15942094	12	-	15866260	15942094	chr12:-:15835906-15942094;chr12:-:15837236-15942094;chr12:-:15940944-15942094	EPS8	ENSG00000151491	ENST00000543468;ENST00000543523;ENST00000281172
chr12:-:31451158-31476670	12	-	31451159	31476670	chr12:-:31451158-31457915;chr12:-:31451158-31476877;chr12:-:31451158-31478159;chr12:-:31451158-31478957;chr12:-:31451158-31479956	FAM60A	ENSG00000139146	ENST00000539409;ENST00000337682;ENST00000539004
chr12:-:31451158-31478769	12	-	31451159	31478769	chr12:-:31451158-31457915;chr12:-:31451158-31476877;chr12:-:31451158-31478159;chr12:-:31451158-31478957;chr12:-:31451158-31479956	FAM60A	ENSG00000139146	ENST00000539409;ENST00000337682;ENST00000539004
chr12:-:31458057-31476877	12	-	31458058	31476877	chr12:-:31451158-31476877;chr12:-:31458057-31478957	FAM60A	ENSG00000139146	ENST00000539409;ENST00000337682;ENST00000539004
chr12:-:42555567-42629415	12	-	42555568	42629415	chr12:-:42555567-42565941;chr12:-:42555567-42592937;chr12:-:42555567-42604156;chr12:-:42555567-42604349;chr12:-:42555567-42631217;chr12:-:42555567-42631400;chr12:-:42555567-42631956;chr12:-:42604421-42629415	YAF2	ENSG00000015153	ENST00000534854
chr12:-:46648719-46662647	12	-	46648720	46662647	chr12:-:46623422-46662647;chr12:-:46633676-46662647;chr12:-:46637097-46662647;chr12:-:46648719-46662308	SLC38A1	ENSG00000111371	ENST00000398637
chr12:-:54577743-54580676	12	-	54577744	54580676	chr12:-:54577743-54580630;chr12:-:54577743-54581602;chr12:-:54577743-54582298;chr12:-:54577743-54582734	SMUG1	ENSG00000123415	ENST00000243112
chr12:-:54577743-54582294	12	-	54577744	54582294	chr12:-:54577743-54580630;chr12:-:54577743-54581602;chr12:-:54577743-54582298;chr12:-:54577743-54582734;chr12:-:54581689-54582294	SMUG1	ENSG00000123415	ENST00000243112
chr12:-:54581686-54582734	12	-	54581687	54582734	chr12:-:54576407-54582734;chr12:-:54577743-54582734;chr12:-:54581686-54582650;chr12:-:54581689-54582734;chr12:-:54582380-54582734	SMUG1	ENSG00000123415	ENST00000243112
chr12:-:57032980-57033763	12	-	57032981	57033763	chr12:-:57032980-57038954;chr12:-:57033091-57033763	ATP5B	ENSG00000110955	ENST00000262030;ENST00000547250
chr12:-:57039098-57039620	12	-	57039099	57039620	chr12:-:57038739-57039620;chr12:-:57039137-57039620	ATP5B	ENSG00000110955	ENST00000262030
chr12:-:6483904-6484193	12	-	6483905	6484193	chr12:-:6483894-6484193;chr12:-:6484003-6484193	SCNN1A	ENSG00000111319	ENST00000360168;ENST00000228916;ENST00000542436
chr12:-:6483994-6484193	12	-	6483995	6484193	chr12:-:6483894-6484193;chr12:-:6484003-6484193	SCNN1A	ENSG00000111319	ENST00000360168;ENST00000228916;ENST00000542436
chr12:-:7076906-7077054	12	-	7076907	7077054	chr12:-:7076401-7077054;chr12:-:7076942-7077054	PHB2	ENSG00000215021	ENST00000535923;ENST00000399433
chr12:-:81242101-81283055	12	-	81242102	81283055	chr12:-:81242101-81283029	LIN7A	ENSG00000111052	ENST00000552864
chr12:+:3239938-3310342	12	+	3239939	3310342	chr12:+:3186619-3310342;chr12:+:3192885-3310342	TSPAN9	ENSG00000011105	ENST00000537971;ENST00000011898
chr12:+:51319298-51323696	12	+	51319299	51323696	chr12:+:51319319-51323696	METTL7A	ENSG00000185432	ENST00000332160
chr12:+:56510583-56510977	12	+	56510584	56510977	chr12:+:56510583-56510972;chr12:+:56510583-56511265	RPL41	ENSG00000229117	ENST00000546591;ENST00000501597;ENST00000546485;ENST00000358888
chr12:+:56510583-56510981	12	+	56510584	56510981	chr12:+:56510583-56510972;chr12:+:56510583-56511265	RPL41	ENSG00000229117	ENST00000546591;ENST00000501597;ENST00000546485;ENST00000358888
chr12:+:6342652-6344403	12	+	6342653	6344403	chr12:+:6342652-6344394	CD9	ENSG00000010278	ENST00000009180
chr12:+:6345441-6346975	12	+	6345442	6346975	chr12:+:6345441-6346928	CD9	ENSG00000010278	ENST00000009180
chr12:+:64825603-64827220	12	+	64825604	64827220	chr12:+:64825603-64827193	XPOT	ENSG00000184575	ENST00000332707
chr12:+:64829454-64838854	12	+	64829455	64838854	chr12:+:64829454-64833023;chr12:+:64833095-64838854	XPOT	ENSG00000184575	ENST00000332707
chr12:+:663154-665712	12	+	663155	665712	chr12:+:663149-665712	B4GALNT3	ENSG00000139044	ENST00000266383
chr12:+:6646556-6646972	12	+	6646557	6646972	chr12:+:6646556-6646749	GAPDH	ENSG00000111640	ENST00000229239;ENST00000396856;ENST00000396859
chr12:+:666032-666778	12	+	666033	666778	chr12:+:666032-666773	B4GALNT3	ENSG00000139044	ENST00000266383
chr12:+:81528783-81536885	12	+	81528784	81536885	chr12:+:81528783-81532909;chr12:+:81533044-81536885	ACSS3	ENSG00000111058	ENST00000548058;ENST00000261206
chr12:+:81537026-81540080	12	+	81537027	81540080	chr12:+:81537026-81545622	ACSS3	ENSG00000111058	ENST00000548058;ENST00000261206
chr12:+:81646583-81647085	12	+	81646584	81647085	chr12:+:81627250-81647085	ACSS3	ENSG00000111058	ENST00000548058;ENST00000261206;ENST00000548324
chr14:-:102975189-102975865	14	-	102975190	102975865	chr14:-:102974886-102975865;chr14:-:102975183-102975865	ANKRD9	ENSG00000156381	ENST00000286918
chr14:-:60616279-60616782	14	-	60616280	60616782	chr14:-:60616286-60616782	DHRS7	ENSG00000100612	ENST00000557185
chr14:-:60620781-60622717	14	-	60620782	60622717	chr14:-:60620783-60622717	DHRS7	ENSG00000100612	ENST00000557185
chr14:-:68159769-68159992	14	-	68159770	68159992	chr14:-:68159769-68162346	RDH11	ENSG00000072042	ENST00000381346;ENST00000553384
chr14:+:24105981-24108387	14	+	24105982	24108387	chr14:+:24105981-24108035;chr14:+:24108213-24108387	DHRS2	ENSG00000100867	ENST00000250383
chr14:+:24105981-24112360	14	+	24105982	24112360	chr14:+:24105981-24108035;chr14:+:24109104-24112360	DHRS2	ENSG00000100867	ENST00000250383
chr14:+:24112428-24113322	14	+	24112429	24113322	chr14:+:24112428-24113319	DHRS2	ENSG00000100867	ENST00000250383
chr14:+:24619657-24619809	14	+	24619658	24619809	chr14:+:24619657-24619806	RNF31	ENSG00000092098	ENST00000324103
chr14:+:24620097-24620390	14	+	24620098	24620390	chr14:+:24620097-24620339;chr14:+:24620097-24620507	RNF31	ENSG00000092098	ENST00000324103
chr14:+:24626847-24627040	14	+	24626848	24627040	chr14:+:24626847-24627106;chr14:+:24626847-24627350	RNF31	ENSG00000092098	ENST00000324103
chr14:+:56084852-56085983	14	+	56084853	56085983	chr14:+:56084852-56085899	KTN1	ENSG00000126777	ENST00000438792;ENST00000395314
chr14:+:56100027-56101314	14	+	56100028	56101314	no.hit	KTN1	ENSG00000126777	ENST00000438792;ENST00000395314
chr14:+:56130759-56133967	14	+	56130760	56133967	chr14:+:56130759-56133958	KTN1	ENSG00000126777	ENST00000438792;ENST00000395314;ENST00000555573
chr14:+:57741155-57746912	14	+	57741156	57746912	chr14:+:57736106-57746912;chr14:+:57741607-57746912;chr14:+:57745326-57746912	AP5M1	ENSG00000053770	ENST00000431972
chr14:+:57741535-57746912	14	+	57741536	57746912	chr14:+:57736106-57746912;chr14:+:57741607-57746912;chr14:+:57745326-57746912	AP5M1	ENSG00000053770	ENST00000431972
chr14:+:60581597-60581699	14	+	60581598	60581699	chr14:+:60581597-60581691	PCNXL4	ENSG00000126773	ENST00000406854
chr14:+:70442521-70444634	14	+	70442522	70444634	chr14:+:70442531-70444634	SMOC1	ENSG00000198732	ENST00000381280
chr14:+:70444682-70459100	14	+	70444683	70459100	chr14:+:70444682-70459133	SMOC1	ENSG00000198732	ENST00000381280
chr14:+:74327360-74329358	14	+	74327361	74329358	chr14:+:74327360-74327786;chr14:+:74327360-74340725	PTGR2	ENSG00000140043	ENST00000555228
chr14:+:77576324-77579772	14	+	77576325	77579772	chr14:+:77576324-77579727;chr14:+:77576324-77579767	CIPC	ENSG00000198894	ENST00000361786
chr14:+:80271542-80327381	14	+	80271543	80327381	chr14:+:80271533-80327381;chr14:+:80271542-80319881;chr14:+:80271542-80328005;chr14:+:80320560-80327381	NRXN3	ENSG00000021645	ENST00000428277
chr14:+:91681900-91690019	14	+	91681901	91690019	chr14:+:91681900-91686786;chr14:+:91681900-91690022;chr14:+:91681900-91691027	C14orf159	ENSG00000133943	ENST00000256324;ENST00000428926;ENST00000412671
chr14:+:95056648-95057089	14	+	95056649	95057089	chr14:+:95056648-95057085	SERPINA5	ENSG00000188488	ENST00000554866
chr15:-:23021429-23026021	15	-	23021430	23026021	chr15:-:23021429-23027800;chr15:-:23021429-23033277;chr15:-:23021429-23033893;chr15:-:23021429-23034146	NIPA2	ENSG00000140157	ENST00000398013
chr15:-:42434347-42434725	15	-	42434348	42434725	chr15:-:42434402-42434725	PLA2G4F	ENSG00000168907	ENST00000397272;ENST00000562320;ENST00000290497
chr15:-:42436313-42436647	15	-	42436314	42436647	chr15:-:42434912-42436647;chr15:-:42436342-42436647	PLA2G4F	ENSG00000168907	ENST00000397272;ENST00000562320;ENST00000290497
chr15:-:42442050-42442301	15	-	42442051	42442301	chr15:-:42442046-42442301	PLA2G4F	ENSG00000168907	ENST00000397272;ENST00000290497
chr15:-:42447787-42447878	15	-	42447788	42447878	chr15:-:42447787-42448636	PLA2G4F	ENSG00000168907	ENST00000397272;ENST00000290497
chr15:-:51350640-51377243	15	-	51350641	51377243	chr15:-:51350640-51386740	TNFAIP8L3	ENSG00000183578	ENST00000327536
chr15:-:52017188-52029546	15	-	52017189	52029546	chr15:-:52017188-52043467;chr15:-:52017318-52029546	LYSMD2	ENSG00000140280	ENST00000454181
chr15:-:52017318-52028955	15	-	52017319	52028955	chr15:-:52017318-52029546;chr15:-:52017318-52030036;chr15:-:52017318-52043467	LYSMD2	ENSG00000140280	ENST00000454181
chr15:-:58933159-58938253	15	-	58933160	58938253	chr15:-:58933159-58936084;chr15:-:58936177-58938253	ADAM10	ENSG00000137845	ENST00000396136
chr15:-:64448341-64448923	15	-	64448342	64448923	chr15:-:64448344-64448923	PPIB	ENSG00000166794	ENST00000300026
chr15:-:65897570-65899496	15	-	65897571	65899496	chr15:-:65892267-65899496;chr15:-:65897570-65899639;chr15:-:65897574-65899496	VWA9	ENSG00000138614	ENST00000313182
chr15:-:74043418-74043942	15	-	74043419	74043942	no.hit	C15orf59	ENSG00000205363	ENST00000569673;ENST00000559817
chr15:-:74043433-74043942	15	-	74043434	74043942	no.hit	C15orf59	ENSG00000205363	ENST00000569673;ENST00000559817
chr15:-:74043438-74043942	15	-	74043439	74043942	chr15:-:74043438-74044450	C15orf59	ENSG00000205363	ENST00000569673;ENST00000559817
chr15:-:74640396-74657991	15	-	74640397	74657991	chr15:-:74640396-74642506;chr15:-:74640396-74651863;chr15:-:74640396-74658056	CYP11A1	ENSG00000140459	ENST00000358632
chr15:-:90020059-90020316	15	-	90020060	90020316	chr15:-:90020059-90020312	RHCG	ENSG00000140519	ENST00000560081;ENST00000268122;ENST00000558360
chr15:-:90023578-90026297	15	-	90023579	90026297	chr15:-:90023639-90026297	RHCG	ENSG00000140519	ENST00000560081;ENST00000268122
chr15:-:90023633-90026297	15	-	90023634	90026297	chr15:-:90023639-90026297	RHCG	ENSG00000140519	ENST00000560081;ENST00000268122
chr15:-:93173575-93181968	15	-	93173576	93181968	chr15:-:93173575-93182387;chr15:-:93173575-93188743;chr15:-:93173575-93196365;chr15:-:93173575-93198360;chr15:-:93173575-93198545	FAM174B	ENSG00000185442	ENST00000327355
chr15:+:31628317-31664212	15	+	31628318	31664212	chr15:+:31619992-31664212;chr15:+:31632190-31664212;chr15:+:31658757-31664212	KLF13	ENSG00000169926	ENST00000307145
chr15:+:49775451-49776510	15	+	49775452	49776510	chr15:+:49775451-49776506	FGF7	ENSG00000140285	ENST00000560765
chr15:+:66172089-66180040	15	+	66172090	66180040	chr15:+:66172089-66180038	RAB11A	ENSG00000103769	ENST00000564910;ENST00000261890;ENST00000566233;ENST00000565075;ENST00000569896;ENST00000567671
chr15:+:78442284-78447554	15	+	78442285	78447554	chr15:+:78441772-78447554;chr15:+:78443302-78447554;chr15:+:78443886-78447554;chr15:+:78447161-78447554	IDH3A	ENSG00000166411	ENST00000558554;ENST00000560396
chr15:+:78447593-78449889	15	+	78447594	78449889	chr15:+:78447593-78449249;chr15:+:78447617-78449889;chr15:+:78449504-78449889	IDH3A	ENSG00000166411	ENST00000558554;ENST00000560396
chr15:+:80469529-80469878	15	+	80469530	80469878	chr15:+:80467433-80469878	FAH	ENSG00000103876	ENST00000261755
chr15:+:80750317-80762560	15	+	80750318	80762560	chr15:+:80750317-80762558	ARNT2	ENSG00000172379	ENST00000303329
chr15:+:80872890-80873594	15	+	80872891	80873594	chr15:+:80872890-80873579	ARNT2	ENSG00000172379	ENST00000303329
chr15:+:89647812-89656955	15	+	89647813	89656955	chr15:+:89631794-89656955;chr15:+:89647275-89656955;chr15:+:89647501-89656955	ABHD2	ENSG00000140526	ENST00000352732;ENST00000355100
chr16:-:14645952-14649510	16	-	14645953	14649510	chr16:-:14645952-14647921;chr16:-:14648008-14649510	PARN	ENSG00000140694	ENST00000437198
chr16:-:19873280-19883137	16	-	19873281	19883137	chr16:-:19873295-19883137	GPRC5B	ENSG00000167191	ENST00000300571;ENST00000569479
chr16:-:28922301-28922404	16	-	28922302	28922404	chr16:-:28922307-28922404	RABEP2	ENSG00000177548	ENST00000358201
chr16:-:47189685-47192783	16	-	47189686	47192783	chr16:-:47189689-47192783	ITFG1	ENSG00000129636	ENST00000320640;ENST00000542691
chr16:-:4862249-4864537	16	-	4862250	4864537	chr16:-:4862249-4863737;chr16:-:4863839-4864537;chr16:-:4863956-4864537	GLYR1	ENSG00000140632	ENST00000436648;ENST00000321919
chr16:-:5108611-5110306	16	-	5108612	5110306	chr16:-:5108611-5110286	C16orf89	ENSG00000153446	ENST00000472572
chr16:-:5108611-5112425	16	-	5108612	5112425	chr16:-:5108611-5110286;chr16:-:5110437-5112425	C16orf89	ENSG00000153446	ENST00000472572
chr16:-:5112570-5115701	16	-	5112571	5115701	chr16:-:5112575-5115701	C16orf89	ENSG00000153446	ENST00000472572
chr16:-:66946620-66947033	16	-	66946621	66947033	chr16:-:66946794-66947033	CDH16	ENSG00000166589	ENST00000299752;ENST00000568632;ENST00000570262;ENST00000565796;ENST00000568698
chr16:-:66946656-66946713	16	-	66946657	66946713	no.hit	CDH16	ENSG00000166589	ENST00000299752;ENST00000568632;ENST00000570262;ENST00000565796;ENST00000568698
chr16:-:66949258-66950025	16	-	66949259	66950025	chr16:-:66948241-66950025	CDH16	ENSG00000166589	ENST00000299752;ENST00000568632;ENST00000570262;ENST00000565796;ENST00000568698
chr16:+:19179983-19184076	16	+	19179984	19184076	chr16:+:19179983-19184081;chr16:+:19179983-19184765	SYT17	ENSG00000103528	ENST00000355377
chr16:+:19179983-19184751	16	+	19179984	19184751	chr16:+:19179983-19184081;chr16:+:19179983-19184765;chr16:+:19184099-19184751	SYT17	ENSG00000103528	ENST00000355377
chr16:+:19184099-19184765	16	+	19184100	19184765	chr16:+:19179983-19184765;chr16:+:19184099-19184751	SYT17	ENSG00000103528	ENST00000355377
chr16:+:2041256-2041974	16	+	2041257	2041974	chr16:+:2040202-2041974;chr16:+:2040673-2041974	SYNGR3	ENSG00000127561	ENST00000248121
chr16:+:2547114-2548267	16	+	2547115	2548267	chr16:+:2547114-2547710;chr16:+:2547114-2548238	TBC1D24	ENSG00000162065	ENST00000567020
chr16:+:30762538-30764552	16	+	30762539	30764552	chr16:+:30762538-30762869;chr16:+:30762924-30764552	PHKG2	ENSG00000156873	ENST00000328273
chr16:+:30762580-30764552	16	+	30762581	30764552	chr16:+:30762924-30764552	PHKG2	ENSG00000156873	ENST00000328273
chr16:+:3706186-3706665	16	+	3706187	3706665	chr16:+:3706186-3706638	DNASE1	ENSG00000213918	ENST00000407479;ENST00000570376;ENST00000573804;ENST00000570807
chr16:+:3706754-3707162	16	+	3706755	3707162	chr16:+:3706754-3706964;chr16:+:3706754-3706999;chr16:+:3706754-3707187	DNASE1	ENSG00000213918	ENST00000407479;ENST00000573804;ENST00000570807
chr16:+:3706754-3707225	16	+	3706755	3707225	chr16:+:3706754-3706964;chr16:+:3706754-3706999;chr16:+:3706754-3707187;chr16:+:3707112-3707225	DNASE1	ENSG00000213918	ENST00000407479;ENST00000573804;ENST00000570807
chr16:+:544806-544970	16	+	544807	544970	no.hit	RAB11FIP3	ENSG00000090565	ENST00000434585;ENST00000450428
chr16:+:765984-766942	16	+	765985	766942	chr16:+:765984-766932	METRN	ENSG00000103260	ENST00000570132;ENST00000219542
chr16:+:81916946-81922779	16	+	81916947	81922779	chr16:+:81916946-81922776	PLCG2	ENSG00000197943	ENST00000359376
chr16:+:88925197-88926070	16	+	88925198	88926070	chr16:+:88925197-88925752;chr16:+:88925197-88925980;chr16:+:88925197-88926300;chr16:+:88925199-88926070	TRAPPC2L	ENSG00000167515	ENST00000567895;ENST00000567312;ENST00000568583
chr16:+:88926380-88927358	16	+	88926381	88927358	chr16:+:88926380-88927300;chr16:+:88926380-88927318;chr16:+:88926380-88927321	TRAPPC2L	ENSG00000167515	ENST00000567895;ENST00000567312;ENST00000568583
chr17:-:17721661-17722326	17	-	17721662	17722326	chr17:-:17721688-17722326	SREBF1	ENSG00000072310	ENST00000355815;ENST00000261646
chr17:-:37373426-37374380	17	-	37373427	37374380	chr17:-:37373426-37374119;chr17:-:37373426-37374321	STAC2	ENSG00000141750	ENST00000333461
chr17:-:42339004-42339669	17	-	42339005	42339669	chr17:-:42339004-42339394;chr17:-:42339004-42340003	SLC4A1	ENSG00000004939	ENST00000262418
chr17:-:6945154-6945314	17	-	6945155	6945314	chr17:-:6945227-6945314	SLC16A11	ENSG00000174326	ENST00000308009
chr17:-:6945154-6946248	17	-	6945155	6946248	chr17:-:6945227-6946248;chr17:-:6946082-6946248	SLC16A11	ENSG00000174326	ENST00000308009
chr17:-:6946392-6946584	17	-	6946393	6946584	chr17:-:6946392-6946630	SLC16A11	ENSG00000174326	ENST00000308009;ENST00000574600
chr17:-:80618923-80620501	17	-	80618924	80620501	chr17:-:80618923-80622371	RAB40B	ENSG00000141542	ENST00000269347;ENST00000538809
chr17:-:80620619-80622371	17	-	80620620	80622371	chr17:-:80618923-80622371;chr17:-:80619146-80622371	RAB40B	ENSG00000141542	ENST00000269347;ENST00000538809
chr17:-:80634662-80656330	17	-	80634663	80656330	chr17:-:80622432-80656330;chr17:-:80654729-80656330	RAB40B	ENSG00000141542	ENST00000269347;ENST00000538809
chr17:+:16285296-16285410	17	+	16285297	16285410	no.hit	UBB	ENSG00000170315	ENST00000302182;ENST00000577640;ENST00000535788
chr17:+:16285497-16285672	17	+	16285498	16285672	chr17:+:16284498-16285672;chr17:+:16285444-16285672	UBB	ENSG00000170315	ENST00000302182;ENST00000577640;ENST00000535788
chr17:+:16285588-16285780	17	+	16285589	16285780	no.hit	UBB	ENSG00000170315	ENST00000302182;ENST00000577640;ENST00000535788
chr17:+:4617604-4618307	17	+	4617605	4618307	chr17:+:4614039-4618307	ARRB2	ENSG00000141480	ENST00000572457
chr17:+:4620571-4620992	17	+	4620572	4620992	chr17:+:4620571-4620979	ARRB2	ENSG00000141480	ENST00000572457
chr17:+:4621047-4621210	17	+	4621048	4621210	chr17:+:4621047-4621182	ARRB2	ENSG00000141480	ENST00000572457
chr17:+:48617695-48618228	17	+	48617696	48618228	chr17:+:48617695-48618153	EPN3	ENSG00000049283	ENST00000574464
chr17:+:8925187-8925627	17	+	8925188	8925627	chr17:+:8924902-8925627	NTN1	ENSG00000065320	ENST00000173229
chr18:-:21113481-21114472	18	-	21113482	21114472	chr18:-:21113481-21114409	NPC1	ENSG00000141458	ENST00000269228
chr18:-:47016922-47017172	18	-	47016923	47017172	chr18:-:47016922-47017162	RPL17-C18orf32;RPL17	ENSG00000215472;ENSG00000265681	ENST00000584895;ENST00000579408;ENST00000579248;ENST00000580261;ENST00000578532
chr18:-:47389697-47390588	18	-	47389698	47390588	chr18:-:47389697-47390510	MYO5B	ENSG00000167306	ENST00000285039;ENST00000324581
chr18:-:57022652-57022783	18	-	57022653	57022783	chr18:-:57022652-57022735	LMAN1	ENSG00000074695	ENST00000251047
chr18:-:59483831-59506195	18	-	59483832	59506195	chr18:-:59483831-59560027	RNF152	ENSG00000176641	ENST00000312828
chr18:-:71920862-71922975	18	-	71920863	71922975	chr18:-:71920900-71922975	CYB5A	ENSG00000166347	ENST00000299438;ENST00000494131;ENST00000397914
chr18:+:11994780-11999052	18	+	11994781	11999052	chr18:+:11981764-11999052	IMPA2	ENSG00000141401	ENST00000269159;ENST00000588927
chr18:+:12720682-12724508	18	+	12720683	12724508	chr18:+:12720682-12724497	PSMG2	ENSG00000128789	ENST00000585331
chr18:+:29078259-29089260	18	+	29078260	29089260	chr18:+:29078259-29098201	DSG2	ENSG00000046604	ENST00000261590
chr18:+:29078469-29098201	18	+	29078470	29098201	chr18:+:29078259-29098201	DSG2	ENSG00000046604	ENST00000261590
chr18:+:29089298-29098201	18	+	29089299	29098201	chr18:+:29078259-29098201	DSG2	ENSG00000046604	ENST00000261590
chr18:+:29099900-29100784	18	+	29099901	29100784	chr18:+:29099900-29100765	DSG2	ENSG00000046604	ENST00000261590
chr18:+:55865101-55895061	18	+	55865102	55895061	chr18:+:55833093-55895061;chr18:+:55862965-55895061;chr18:+:55865101-55912658;chr18:+:55888989-55895061	NEDD4L	ENSG00000049759	ENST00000382850;ENST00000456986
chr18:+:55865637-55912658	18	+	55865638	55912658	chr18:+:55833093-55912658;chr18:+:55862965-55912658;chr18:+:55865101-55912658;chr18:+:55888989-55912658;chr18:+:55895120-55912658;chr18:+:55895139-55912658	NEDD4L	ENSG00000049759	ENST00000382850;ENST00000456986
chr18:+:55891466-55912658	18	+	55891467	55912658	chr18:+:55833093-55912658;chr18:+:55862965-55912658;chr18:+:55865101-55912658;chr18:+:55888989-55912658;chr18:+:55895120-55912658;chr18:+:55895139-55912658	NEDD4L	ENSG00000049759	ENST00000382850;ENST00000456986;ENST00000431212
chr18:+:56815763-56816744	18	+	56815764	56816744	chr18:+:56807267-56816744	SEC11C	ENSG00000166562	ENST00000587834;ENST00000299714;ENST00000588875
chr19:-:1088712-1089470	19	-	1088713	1089470	chr19:-:1088719-1089470	POLR2E	ENSG00000099817	ENST00000215587;ENST00000589737
chr19:-:10943515-10943626	19	-	10943516	10943626	no.hit	TMED1	ENSG00000099203	ENST00000214869
chr19:-:11531880-11532304	19	-	11531881	11532304	chr19:-:11531880-11532344	CCDC151	ENSG00000198003	ENST00000586836
chr19:-:11533291-11533368	19	-	11533292	11533368	chr19:-:11533295-11533368	CCDC151	ENSG00000198003	ENST00000586836
chr19:-:11533295-11533373	19	-	11533296	11533373	chr19:-:11533295-11533368	CCDC151	ENSG00000198003	ENST00000586836
chr19:-:11533529-11534435	19	-	11533530	11534435	chr19:-:11533529-11534545	CCDC151	ENSG00000198003	ENST00000586836
chr19:-:2042506-2042605	19	-	2042507	2042605	chr19:-:2042521-2042605	MKNK2	ENSG00000099875	ENST00000591601
chr19:-:3053351-3053422	19	-	3053352	3053422	no.hit	AES	ENSG00000104964	ENST00000221561;ENST00000327141;ENST00000587393
chr19:-:3978005-3979326	19	-	3978006	3979326	chr19:-:3978170-3979326	EEF2	ENSG00000167658	ENST00000309311
chr19:-:40947688-40947826	19	-	40947689	40947826	no.hit	SERTAD3	ENSG00000167565	ENST00000392028
chr19:-:44050255-44050746	19	-	44050256	44050746	chr19:-:44050258-44050746	XRCC1	ENSG00000073050	ENST00000543982
chr19:-:49118676-49119183	19	-	49118677	49119183	no.hit	RPL18	ENSG00000063177	ENST00000547897;ENST00000084795;ENST00000550645;ENST00000549370
chr19:-:51322595-51323154	19	-	51322596	51323154	chr19:-:51322605-51323154	KLK1	ENSG00000167748	ENST00000593859;ENST00000301420;ENST00000596300
chr19:-:51322605-51323157	19	-	51322606	51323157	chr19:-:51322605-51323154	KLK1	ENSG00000167748	ENST00000593859;ENST00000301420;ENST00000596300
chr19:-:51322605-51323159	19	-	51322606	51323159	chr19:-:51322605-51323154	KLK1	ENSG00000167748	ENST00000593859;ENST00000301420;ENST00000596300
chr19:-:51322605-51323211	19	-	51322606	51323211	chr19:-:51322605-51323154	KLK1	ENSG00000167748	ENST00000593859;ENST00000301420;ENST00000596300
chr19:-:51331071-51340370	19	-	51331072	51340370	chr19:-:51331071-51334705;chr19:-:51334779-51340370	KLK15	ENSG00000174562	ENST00000326856
chr19:-:51334779-51336354	19	-	51334780	51336354	chr19:-:51331068-51336354;chr19:-:51334779-51340370	KLK15	ENSG00000174562	ENST00000326856
chr19:-:51334779-51336782	19	-	51334780	51336782	chr19:-:51334779-51340370	KLK15	ENSG00000174562	ENST00000326856
chr19:-:51409808-51410090	19	-	51409809	51410090	chr19:-:51409808-51410017	KLK4	ENSG00000167749	ENST00000324041
chr19:-:51410040-51410084	19	-	51410041	51410084	no.hit	KLK4	ENSG00000167749	ENST00000324041
chr19:-:51412645-51413933	19	-	51412646	51413933	chr19:-:51412651-51413933;chr19:-:51412670-51413933	KLK4	ENSG00000167749	ENST00000324041
chr19:-:59067744-59068053	19	-	59067745	59068053	chr19:-:59067746-59068053	UBE2M	ENSG00000130725	ENST00000253023;ENST00000595957
chr19:-:7128962-7132168	19	-	7128963	7132168	chr19:-:7128965-7132168	INSR	ENSG00000171105	ENST00000341500
chr19:-:8032584-8038608	19	-	8032585	8038608	chr19:-:8032674-8038608;chr19:-:8038509-8038608	ELAVL1	ENSG00000066044	ENST00000351593
chr19:-:8046070-8047555	19	-	8046071	8047555	chr19:-:8046070-8056527	ELAVL1	ENSG00000066044	ENST00000351593
chr19:+:1105509-1105663	19	+	1105510	1105663	chr19:+:1105509-1105656	GPX4	ENSG00000167468	ENST00000588919
chr19:+:13885521-13888872	19	+	13885522	13888872	chr19:+:13885521-13886284;chr19:+:13885521-13886290;chr19:+:13885521-13888865	C19orf53	ENSG00000104979	ENST00000588234;ENST00000221576;ENST00000588841
chr19:+:16791381-16793231	19	+	16791382	16793231	chr19:+:16791392-16793231	TMEM38A	ENSG00000072954	ENST00000187762
chr19:+:18286189-18286414	19	+	18286190	18286414	chr19:+:18286195-18286414	IFI30	ENSG00000216490	ENST00000407280
chr19:+:18684558-18685681	19	+	18684559	18685681	chr19:+:18684558-18685679	UBA52	ENSG00000221983	ENST00000430157;ENST00000442744;ENST00000597451
chr19:+:2271473-2271780	19	+	2271474	2271780	chr19:+:2269743-2271780;chr19:+:2271529-2271780	OAZ1	ENSG00000104904	ENST00000592787;ENST00000602676;ENST00000592727
chr19:+:39658026-39658869	19	+	39658027	39658869	chr19:+:39616559-39658869;chr19:+:39647490-39658869;chr19:+:39658725-39658869	PAK4	ENSG00000130669	ENST00000321944;ENST00000358301
chr19:+:47496799-47502560	19	+	47496800	47502560	chr19:+:47492932-47502560;chr19:+:47502401-47502560	ARHGAP35	ENSG00000160007	ENST00000404338
chr19:+:49994804-49994987	19	+	49994805	49994987	chr19:+:49994804-49994985	RPL13A	ENSG00000142541	ENST00000391857;ENST00000477613;ENST00000467825
chr19:+:50000556-50000776	19	+	50000557	50000776	chr19:+:50000582-50000776	RPS11	ENSG00000142534	ENST00000270625
chr19:+:50086561-50086819	19	+	50086562	50086819	chr19:+:50086561-50086631;chr19:+:50086561-50086798	PRRG2	ENSG00000126460	ENST00000246794
chr19:+:55898039-55899297	19	+	55898040	55899297	chr19:+:55898042-55899297;chr19:+:55898061-55899297	RPL28	ENSG00000108107	ENST00000558815;ENST00000559463;ENST00000558131
chr19:+:56204403-56206094	19	+	56204404	56206094	chr19:+:56204403-56206091	EPN1	ENSG00000063245	ENST00000085079
chr19:+:5691422-5691542	19	+	5691423	5691542	chr19:+:5691464-5691542	RPL36	ENSG00000130255	ENST00000579649;ENST00000347512;ENST00000579446;ENST00000394580
chr19:+:605222-608005	19	+	605223	608005	chr19:+:605222-607963	HCN2	ENSG00000099822	ENST00000251287
chr19:+:614016-614932	19	+	614017	614932	chr19:+:614016-615794	HCN2	ENSG00000099822	ENST00000251287
chr19:+:615006-615794	19	+	615007	615794	chr19:+:614016-615794	HCN2	ENSG00000099822	ENST00000251287
chr19:+:7593607-7593706	19	+	7593608	7593706	chr19:+:7593589-7593706	MCOLN1	ENSG00000090674	ENST00000264079
chr19:+:7895267-7911385	19	+	7895268	7911385	chr19:+:7895267-7911381	EVI5L	ENSG00000142459	ENST00000270530
chr19:+:7914186-7914897	19	+	7914187	7914897	no.hit	EVI5L	ENSG00000142459	ENST00000270530
chr19:+:7923217-7925449	19	+	7923218	7925449	chr19:+:7923217-7923293;chr19:+:7923217-7925446	EVI5L	ENSG00000142459	ENST00000270530
chr19:+:8274378-8315927	19	+	8274379	8315927	chr19:+:8274378-8275566;chr19:+:8274378-8275589;chr19:+:8274378-8315959;chr19:+:8275746-8315927	CERS4	ENSG00000090661	ENST00000251363;ENST00000559450
chr19:+:8275746-8315656	19	+	8275747	8315656	chr19:+:8275746-8279249;chr19:+:8275746-8305369;chr19:+:8275746-8315927;chr19:+:8275746-8315959;chr19:+:8275746-8315993;chr19:+:8275746-8319382	CERS4	ENSG00000090661	ENST00000251363;ENST00000559450
chr19:+:8275746-8315998	19	+	8275747	8315998	chr19:+:8275746-8279249;chr19:+:8275746-8305369;chr19:+:8275746-8315927;chr19:+:8275746-8315959;chr19:+:8275746-8315993;chr19:+:8275746-8319382	CERS4	ENSG00000090661	ENST00000251363;ENST00000559450
chr19:+:8306341-8315998	19	+	8306342	8315998	chr19:+:8306341-8315959;chr19:+:8306341-8319382	CERS4	ENSG00000090661	ENST00000251363;ENST00000559450
chr19:+:8316133-8319433	19	+	8316134	8319433	chr19:+:8316133-8319382	CERS4	ENSG00000090661	ENST00000251363;ENST00000559450
chr19:+:8320609-8320687	19	+	8320610	8320687	chr19:+:8320609-8320705	CERS4	ENSG00000090661	ENST00000251363;ENST00000559450
chr19:+:8321594-8321894	19	+	8321595	8321894	chr19:+:8321594-8321832	CERS4	ENSG00000090661	ENST00000251363;ENST00000559450
chr2:-:168994731-168994952	2	-	168994732	168994952	chr2:-:168994731-168996798	STK39	ENSG00000198648	ENST00000355999
chr2:-:176043863-176044825	2	-	176043864	176044825	chr2:-:176043978-176044825	ATP5G3	ENSG00000154518	ENST00000409194;ENST00000392541;ENST00000497075
chr2:-:20405185-20407939	2	-	20405186	20407939	chr2:-:20405185-20422963;chr2:-:20405185-20423951;chr2:-:20405185-20424562	SDC1	ENSG00000115884	ENST00000254351
chr2:-:211081215-211082688	2	-	211081216	211082688	chr2:-:211081235-211082688	ACADL	ENSG00000115361	ENST00000233710
chr2:-:216271227-216271849	2	-	216271228	216271849	chr2:-:216271233-216271849	FN1	ENSG00000115414	ENST00000446046
chr2:-:27294331-27294473	2	-	27294332	27294473	chr2:-:27294331-27294468	OST4	ENSG00000228474	ENST00000456793
chr2:-:85554341-85554468	2	-	85554342	85554468	no.hit	TGOLN2	ENSG00000152291	ENST00000377386;ENST00000398263
chr2:+:187490314-187495526	2	+	187490315	187495526	chr2:+:187490314-187495523;chr2:+:187490314-187500808	ITGAV	ENSG00000138448	ENST00000261023
chr2:+:189157907-189248489	2	+	189157908	189248489	chr2:+:189157839-189248489;chr2:+:189157907-189158926;chr2:+:189159120-189248489	GULP1	ENSG00000144366	ENST00000359135
chr2:+:223799405-223806218	2	+	223799406	223806218	chr2:+:223799405-223806214	ACSL3	ENSG00000123983	ENST00000357430;ENST00000392066
chr2:+:231281700-231282305	2	+	231281701	231282305	chr2:+:231281043-231282305;chr2:+:231281596-231282305	SP100	ENSG00000067066	ENST00000409341
chr2:+:71187208-71188062	2	+	71187209	71188062	chr2:+:71187208-71188050	ATP6V1B1	ENSG00000116039	ENST00000234396
chr2:+:95713871-95715332	2	+	95713872	95715332	chr2:+:95713871-95715325;chr2:+:95713871-95719125	MAL	ENSG00000172005	ENST00000309988
chr20:-:1293406-1293992	20	-	1293407	1293992	chr20:-:1293406-1293983	SDCBP2	ENSG00000125775	ENST00000360779
chr20:-:17601449-17602102	20	-	17601450	17602102	chr20:-:17601452-17602102	RRBP1	ENSG00000125844	ENST00000377813;ENST00000246043;ENST00000455029
chr20:-:17641173-17660639	20	-	17641174	17660639	chr20:-:17641173-17660643;chr20:-:17641173-17662672	RRBP1	ENSG00000125844	ENST00000377813;ENST00000455029
chr20:-:20571955-20582325	20	-	20571956	20582325	chr20:-:20571958-20582325;chr20:-:20579463-20582325	RALGAPA2	ENSG00000188559	ENST00000430436
chr20:-:30457400-30457940	20	-	30457401	30457940	chr20:-:30457400-30457612;chr20:-:30457400-30457850;chr20:-:30457400-30458119;chr20:-:30457400-30458378	DUSP15	ENSG00000149599	ENST00000486996;ENST00000398084;ENST00000339738;ENST00000459848
chr20:-:33342635-33345022	20	-	33342636	33345022	chr20:-:33342671-33345022	NCOA6	ENSG00000198646	ENST00000359003
chr20:-:33342638-33345022	20	-	33342639	33345022	chr20:-:33342671-33345022	NCOA6	ENSG00000198646	ENST00000359003
chr20:-:42835959-42838651	20	-	42835960	42838651	chr20:-:42835959-42836193;chr20:-:42836233-42838651	OSER1	ENSG00000132823	ENST00000255174
chr20:-:7963263-7964440	20	-	7963264	7964440	chr20:-:7963268-7964440	TMX4	ENSG00000125827	ENST00000246024
chr20:+:25196347-25197287	20	+	25196348	25197287	chr20:+:25196347-25197283	ENTPD6	ENSG00000197586	ENST00000376652;ENST00000376666
chr20:+:33857701-33862074	20	+	33857702	33862074	chr20:+:33857701-33859371;chr20:+:33859638-33862074	MMP24	ENSG00000125966	ENST00000246186
chr20:+:33859638-33859838	20	+	33859639	33859838	chr20:+:33859638-33862074	MMP24	ENSG00000125966	ENST00000246186
chr20:+:47538547-47567859	20	+	47538548	47567859	chr20:+:47538547-47557735;chr20:+:47558524-47567859	ARFGEF2	ENSG00000124198	ENST00000371917
chr20:+:47606221-47607628	20	+	47606222	47607628	chr20:+:47606221-47607576	ARFGEF2	ENSG00000124198	ENST00000371917
chr20:+:49416212-49434747	20	+	49416213	49434747	chr20:+:49411710-49434747	BCAS4	ENSG00000124243	ENST00000358791
chr20:+:49458437-49468478	20	+	49458438	49468478	chr20:+:49458437-49492533;chr20:+:49458437-49493022	BCAS4	ENSG00000124243	ENST00000358791
chr20:+:49468657-49493022	20	+	49468658	49493022	chr20:+:49446917-49493022;chr20:+:49458437-49493022;chr20:+:49492630-49493022	BCAS4	ENSG00000124243	ENST00000358791
chr20:+:57485456-57485739	20	+	57485457	57485739	chr20:+:57485456-57485737	GNAS	ENSG00000087460	ENST00000477931;ENST00000480975;ENST00000371095;ENST00000371085;ENST00000354359;ENST00000265620
chr21:-:27372495-27394155	21	-	27372496	27394155	chr21:-:27354790-27394155;chr21:-:27369731-27394155;chr21:-:27372497-27394155;chr21:-:27382228-27394155	APP	ENSG00000142192	ENST00000346798;ENST00000348990;ENST00000357903;ENST00000439274
chr21:-:35791928-35794036	21	-	35791929	35794036	chr21:-:35791928-35796130	AP000322.53	ENSG00000243627	ENST00000450895
chr21:-:35794102-35796130	21	-	35794103	35796130	chr21:-:35791928-35796130	AP000322.53	ENSG00000243627	ENST00000450895
chr21:-:35794660-35795080	21	-	35794661	35795080	no.hit	AP000322.53	ENSG00000243627	ENST00000450895
chr21:-:35795207-35796130	21	-	35795208	35796130	chr21:-:35791928-35796130	AP000322.53	ENSG00000243627	ENST00000450895
chr21:-:42840453-42842574	21	-	42840454	42842574	chr21:-:42840465-42842574	TMPRSS2	ENSG00000184012	ENST00000332149
chr21:+:42540502-42582452	21	+	42540503	42582452	chr21:+:42540502-42598192	BACE2	ENSG00000182240	ENST00000347667
chr21:+:42540502-42598198	21	+	42540503	42598198	chr21:+:42540502-42598192	BACE2	ENSG00000182240	ENST00000347667
chr21:+:42582959-42598192	21	+	42582960	42598192	chr21:+:42540502-42598192;chr21:+:42597622-42598192	BACE2	ENSG00000182240	ENST00000347667
chr21:+:42609191-42609439	21	+	42609192	42609439	chr21:+:42598281-42609439;chr21:+:42602150-42609439;chr21:+:42608591-42609439	BACE2	ENSG00000182240	ENST00000347667;ENST00000487994;ENST00000466122
chr21:+:42629253-42647306	21	+	42629254	42647306	chr21:+:42629253-42647297	BACE2	ENSG00000182240	ENST00000347667;ENST00000487994;ENST00000466122;ENST00000463674
chr21:+:43655498-43691179	21	+	43655499	43691179	chr21:+:43646024-43691179;chr21:+:43680249-43691179	ABCG1	ENSG00000160179	ENST00000398449;ENST00000361802
chr21:+:43711788-43714651	21	+	43711789	43714651	chr21:+:43711766-43714651	ABCG1	ENSG00000160179	ENST00000398449;ENST00000361802
chr21:+:44317157-44323520	21	+	44317158	44323520	chr21:+:44317157-44323291;chr21:+:44317157-44328973	NDUFV3	ENSG00000160194	ENST00000354250
chr22:-:21097052-21101870	22	-	21097053	21101870	chr22:-:21097052-21098915;chr22:-:21099008-21101870	PI4KA	ENSG00000241973	ENST00000255882
chr22:-:36745300-36762276	22	-	36745301	36762276	chr22:-:36745300-36760823;chr22:-:36745300-36761090;chr22:-:36745300-36783851	MYH9	ENSG00000100345	ENST00000216181
chr22:-:36745300-36763607	22	-	36745301	36763607	chr22:-:36745300-36760823;chr22:-:36745300-36761090;chr22:-:36745300-36783851	MYH9	ENSG00000100345	ENST00000216181
chr22:-:42457026-42458830	22	-	42457027	42458830	chr22:-:42457071-42458830	NAGA	ENSG00000198951	ENST00000396398
chr22:+:18138524-18165979	22	+	18138525	18165979	chr22:+:18121652-18165979;chr22:+:18138598-18165979	BCL2L13	ENSG00000099968	ENST00000317582
chr22:+:20040107-20043470	22	+	20040108	20043470	chr22:+:20040107-20040882;chr22:+:20040107-20040959;chr22:+:20040107-20043465;chr22:+:20040107-20049052	TANGO2	ENSG00000183597	ENST00000398042;ENST00000327374;ENST00000432883;ENST00000456048
chr22:+:31519105-31521818	22	+	31519106	31521818	chr22:+:31519105-31519881;chr22:+:31519105-31520127;chr22:+:31519105-31520830;chr22:+:31519105-31522279;chr22:+:31519105-31522361;chr22:+:31520892-31521818	INPP5J	ENSG00000185133	ENST00000331075;ENST00000412277;ENST00000400294
chr22:+:31519881-31520127	22	+	31519882	31520127	chr22:+:31519105-31520127;chr22:+:31519991-31520127	INPP5J	ENSG00000185133	ENST00000331075;ENST00000412277;ENST00000400294
chr22:+:31522707-31523342	22	+	31522708	31523342	chr22:+:31522707-31522906;chr22:+:31523023-31523342	INPP5J	ENSG00000185133	ENST00000331075;ENST00000412277;ENST00000400294
chr22:+:31523023-31523432	22	+	31523024	31523432	chr22:+:31523023-31523342	INPP5J	ENSG00000185133	ENST00000331075;ENST00000412277;ENST00000400294
chr22:+:31524640-31529094	22	+	31524641	31529094	chr22:+:31524640-31529083	INPP5J	ENSG00000185133	ENST00000331075;ENST00000412277;ENST00000400294
chr22:+:31528098-31529083	22	+	31528099	31529083	chr22:+:31524640-31529083	INPP5J	ENSG00000185133	ENST00000331075;ENST00000412277;ENST00000400294
chr22:+:38609896-38610432	22	+	38609897	38610432	chr22:+:38609896-38610426	MAFF	ENSG00000185022	ENST00000338483
chr22:+:44420331-44435715	22	+	44420332	44435715	chr22:+:44420331-44489807;chr22:+:44427387-44435715	PARVB	ENSG00000188677	ENST00000402876
chr22:+:47072565-47073472	22	+	47072566	47073472	chr22:+:47072565-47073043	GRAMD4	ENSG00000075240	ENST00000361034
chr3:-:101404763-101405325	3	-	101404764	101405325	chr3:-:101404772-101405325	RPL24	ENSG00000114391	ENST00000394077;ENST00000495401
chr3:-:122090577-122102020	3	-	122090578	122102020	chr3:-:122081874-122102020;chr3:-:122090647-122102020	CCDC58	ENSG00000160124	ENST00000291458
chr3:-:127294100-127294245	3	-	127294101	127294245	chr3:-:127294108-127294245	TPRA1	ENSG00000163870	ENST00000450633
chr3:-:43474219-43498854	3	-	43474220	43498854	chr3:-:43474219-43591211	ANO10	ENSG00000160746	ENST00000350459
chr3:-:43498923-43532175	3	-	43498924	43532175	no.hit	ANO10	ENSG00000160746	ENST00000350459
chr3:-:46967025-46981680	3	-	46967026	46981680	chr3:-:46967025-46982487	CCDC12	ENSG00000160799	ENST00000292314
chr3:-:47676831-47677511	3	-	47676832	47677511	chr3:-:47676834-47677511	SMARCC1	ENSG00000173473	ENST00000254480
chr3:-:69111292-69112132	3	-	69111293	69112132	chr3:-:69111330-69112132	UBA3	ENSG00000144744	ENST00000361055
chr3:+:130711845-130712784	3	+	130711846	130712784	chr3:+:130711845-130712775	ATP2C1	ENSG00000017260	ENST00000504612
chr3:+:150129095-150155984	3	+	150129096	150155984	chr3:+:150129095-150140835;chr3:+:150129095-150174862;chr3:+:150129095-150176162;chr3:+:150140907-150155984	TSC22D2	ENSG00000196428	ENST00000466814
chr3:+:167466519-167506898	3	+	167466520	167506898	chr3:+:167453600-167506898;chr3:+:167453611-167506898;chr3:+:167453923-167506898	SERPINI1	ENSG00000163536	ENST00000446050
chr3:+:184035219-184035504	3	+	184035220	184035504	chr3:+:184034006-184035504;chr3:+:184035285-184035504	EIF4G1	ENSG00000114867	ENST00000411531
chr3:+:195453433-195456518	3	+	195453434	195456518	chr3:+:195453443-195456518;chr3:+:195456422-195456518	MUC20	ENSG00000176945	ENST00000447234;ENST00000320736;ENST00000498018
chr3:+:40500227-40502907	3	+	40500228	40502907	chr3:+:40500227-40502897	RPL14	ENSG00000188846	ENST00000396203;ENST00000416518;ENST00000479563
chr3:+:42056086-42128595	3	+	42056087	42128595	chr3:+:42055609-42128595	TRAK1	ENSG00000182606	ENST00000487159
chr3:+:42128159-42128595	3	+	42128160	42128595	chr3:+:42055609-42128595	TRAK1	ENSG00000182606	ENST00000487159
chr3:+:4345210-4355350	3	+	4345211	4355350	chr3:+:4345210-4354581;chr3:+:4345210-4355330;chr3:+:4354913-4355350	SETMAR	ENSG00000170364	ENST00000425046
chr3:+:4345552-4354581	3	+	4345553	4354581	chr3:+:4345210-4354581;chr3:+:4345552-4355330;chr3:+:4345552-4357895;chr3:+:4345774-4354581	SETMAR	ENSG00000170364	ENST00000425046
chr3:+:45046906-45048947	3	+	45046907	45048947	chr3:+:45046906-45048911	EXOSC7	ENSG00000075914	ENST00000461361;ENST00000265564
chr3:+:45747942-45748271	3	+	45747943	45748271	chr3:+:45746701-45748271	SACM1L	ENSG00000211456	ENST00000389061
chr3:+:51737889-51738056	3	+	51737890	51738056	no.hit	TEX264	ENSG00000164081	ENST00000341333
chr3:+:53199231-53207508	3	+	53199232	53207508	chr3:+:53199231-53212419	PRKCD	ENSG00000163932	ENST00000394729;ENST00000330452
chr3:+:53219716-53219949	3	+	53219717	53219949	chr3:+:53219716-53219942	PRKCD	ENSG00000163932	ENST00000394729;ENST00000330452
chr3:+:53220016-53220182	3	+	53220017	53220182	chr3:+:53220043-53220182	PRKCD	ENSG00000163932	ENST00000394729;ENST00000330452
chr3:+:53220293-53220619	3	+	53220294	53220619	chr3:+:53220356-53220619	PRKCD	ENSG00000163932	ENST00000394729;ENST00000330452
chr3:+:58111470-58112330	3	+	58111471	58112330	chr3:+:58111470-58112328	FLNB	ENSG00000136068	ENST00000295956;ENST00000419752
chr3:+:58319318-58351600	3	+	58319319	58351600	chr3:+:58318817-58351600;chr3:+:58319351-58351600	PXK	ENSG00000168297	ENST00000356151
chr3:+:58355205-58363635	3	+	58355206	58363635	chr3:+:58355205-58368240	PXK	ENSG00000168297	ENST00000356151
chr3:+:58363791-58368240	3	+	58363792	58368240	chr3:+:58318817-58368240;chr3:+:58355205-58368240	PXK	ENSG00000168297	ENST00000356151
chr3:+:58395345-58395819	3	+	58395346	58395819	chr3:+:58395345-58395816	PXK	ENSG00000168297	ENST00000356151;ENST00000479134
chr3:+:58395345-58410478	3	+	58395346	58410478	chr3:+:58395345-58395816;chr3:+:58395886-58410478;chr3:+:58398690-58410478;chr3:+:58406295-58410478;chr3:+:58409221-58410478	PXK	ENSG00000168297	ENST00000356151;ENST00000479134
chr3:+:66313803-66419901	3	+	66313804	66419901	chr3:+:66313803-66354876;chr3:+:66313803-66396787;chr3:+:66396832-66419901;chr3:+:66413353-66419901	SLC25A26	ENSG00000144741	ENST00000336733
chr3:+:98451855-98487273	3	+	98451856	98487273	chr3:+:98451376-98487273;chr3:+:98451855-98475212;chr3:+:98451855-98489722;chr3:+:98475384-98487273;chr3:+:98482275-98487273;chr3:+:98482283-98487273	ST3GAL6	ENSG00000064225	ENST00000483910
chr4:-:10494095-10502879	4	-	10494096	10502879	chr4:-:10492237-10502879	CLNK	ENSG00000109684	ENST00000226951
chr4:-:10527546-10533136	4	-	10527547	10533136	chr4:-:10527546-10529699	CLNK	ENSG00000109684	ENST00000226951
chr4:-:10529718-10533136	4	-	10529719	10533136	chr4:-:10529718-10533879	CLNK	ENSG00000109684	ENST00000226951
chr4:-:10541600-10542117	4	-	10541601	10542117	chr4:-:10533907-10542117	CLNK	ENSG00000109684	ENST00000226951
chr4:-:10543904-10546657	4	-	10543905	10546657	chr4:-:10543904-10560030	CLNK	ENSG00000109684	ENST00000226951
chr4:-:10546853-10560030	4	-	10546854	10560030	chr4:-:10543904-10560030	CLNK	ENSG00000109684	ENST00000226951
chr4:-:10560076-10566304	4	-	10560077	10566304	chr4:-:10560076-10566294	CLNK	ENSG00000109684	ENST00000226951
chr4:-:10570508-10573364	4	-	10570509	10573364	chr4:-:10567774-10573364	CLNK	ENSG00000109684	ENST00000226951
chr4:-:10586579-10669482	4	-	10586580	10669482	chr4:-:10586579-10599601;chr4:-:10599673-10669482	CLNK	ENSG00000109684	ENST00000226951
chr4:-:1219299-1222008	4	-	1219300	1222008	no.hit	CTBP1	ENSG00000159692	ENST00000382952
chr4:-:140221858-140222117	4	-	140221859	140222117	chr4:-:140217114-140222117;chr4:-:140217521-140222117	NDUFC1	ENSG00000109390	ENST00000539002;ENST00000394225
chr4:-:15638296-15640130	4	-	15638297	15640130	chr4:-:15638293-15640130;chr4:-:15638299-15640130	FBXL5	ENSG00000118564	ENST00000513163;ENST00000412094
chr4:-:159092751-159094024	4	-	159092752	159094024	chr4:-:159092641-159094024;chr4:-:159092751-159093490;chr4:-:159092751-159094019	FAM198B	ENSG00000164125	ENST00000585682
chr4:-:1719402-1720039	4	-	1719403	1720039	chr4:-:1719402-1719878	TMEM129	ENSG00000168936	ENST00000382936
chr4:-:17806379-17806729	4	-	17806380	17806729	chr4:-:17806379-17812069;chr4:-:17806394-17806729	DCAF16	ENSG00000163257	ENST00000382247
chr4:-:17806394-17812069	4	-	17806395	17812069	chr4:-:17806379-17812069;chr4:-:17806394-17806729;chr4:-:17806848-17812069;chr4:-:17811315-17812069	DCAF16	ENSG00000163257	ENST00000382247
chr4:-:184570721-184572132	4	-	184570722	184572132	chr4:-:184570721-184572136	RWDD4	ENSG00000182552	ENST00000327570
chr4:-:185709880-185724473	4	-	185709881	185724473	chr4:-:185709885-185724473	ACSL1	ENSG00000151726	ENST00000454703;ENST00000281455;ENST00000513317
chr4:-:185724700-185729160	4	-	185724701	185729160	chr4:-:185724700-185726680;chr4:-:185724700-185729445;chr4:-:185724700-185733313;chr4:-:185724700-185747069	ACSL1	ENSG00000151726	ENST00000454703;ENST00000281455
chr4:-:39458098-39459205	4	-	39458099	39459205	chr4:-:39458158-39459205	RPL9	ENSG00000163682	ENST00000295955;ENST00000504470
chr4:-:39865050-39868480	4	-	39865051	39868480	chr4:-:39865079-39868480	PDS5A	ENSG00000121892	ENST00000303538
chr4:-:666301-667091	4	-	666302	667091	chr4:-:666308-667091	ATP5I	ENSG00000169020	ENST00000304312;ENST00000505852
chr4:-:71686578-71691012	4	-	71686579	71691012	chr4:-:71686578-71690010;chr4:-:71686578-71701874;chr4:-:71690085-71691012	GRSF1	ENSG00000132463	ENST00000514161;ENST00000545193
chr4:-:71697351-71698023	4	-	71697352	71698023	chr4:-:71693753-71698023;chr4:-:71697391-71698023	GRSF1	ENSG00000132463	ENST00000514161;ENST00000545193
chr4:-:71698941-71701874	4	-	71698942	71701874	chr4:-:71686578-71701874;chr4:-:71698990-71701874	GRSF1	ENSG00000132463	ENST00000514161;ENST00000545193
chr4:-:89702502-89702583	4	-	89702503	89702583	chr4:-:89702502-89708903	FAM13A	ENSG00000138640	ENST00000395002
chr4:-:99397607-99399835	4	-	99397608	99399835	chr4:-:99397611-99399835	TSPAN5	ENSG00000168785	ENST00000508798;ENST00000305798
chr4:-:99403326-99428828	4	-	99403327	99428828	chr4:-:99403326-99405535;chr4:-:99403326-99405549;chr4:-:99403326-99407888;chr4:-:99408035-99428828	TSPAN5	ENSG00000168785	ENST00000508798;ENST00000305798
chr4:-:99428879-99564233	4	-	99428880	99564233	chr4:-:99428879-99481325;chr4:-:99428879-99495607;chr4:-:99428879-99578675;chr4:-:99428879-99578690;chr4:-:99428879-99579296	TSPAN5	ENSG00000168785	ENST00000508798;ENST00000305798
chr4:+:110915495-110915888	4	+	110915496	110915888	chr4:+:110909865-110915888;chr4:+:110914525-110915888	EGF	ENSG00000138798	ENST00000265171
chr4:+:110915495-110920834	4	+	110915496	110920834	chr4:+:110916036-110920834	EGF	ENSG00000138798	ENST00000265171
chr4:+:113184242-113186168	4	+	113184243	113186168	chr4:+:113184242-113186164	AP1AR	ENSG00000138660	ENST00000274000
chr4:+:115520130-115585150	4	+	115520131	115585150	chr4:+:115520130-115540578;chr4:+:115520130-115544034;chr4:+:115544858-115585150	UGT8	ENSG00000174607	ENST00000310836
chr4:+:115520213-115544034	4	+	115520214	115544034	chr4:+:115520130-115544034;chr4:+:115540681-115544034	UGT8	ENSG00000174607	ENST00000310836
chr4:+:148552656-148554023	4	+	148552657	148554023	chr4:+:148552656-148554053;chr4:+:148552656-148554105	TMEM184C	ENSG00000164168	ENST00000296582
chr4:+:154125712-154191489	4	+	154125713	154191489	chr4:+:154125712-154143394;chr4:+:154125712-154191486;chr4:+:154178918-154191489	TRIM2	ENSG00000109654	ENST00000338700
chr4:+:154191671-154197094	4	+	154191672	154197094	chr4:+:154191671-154197044	TRIM2	ENSG00000109654	ENST00000338700
chr4:+:154197282-154202616	4	+	154197283	154202616	chr4:+:154197282-154214133;chr4:+:154197282-154216464	TRIM2	ENSG00000109654	ENST00000338700
chr4:+:154202717-154214133	4	+	154202718	154214133	chr4:+:154197282-154214133	TRIM2	ENSG00000109654	ENST00000338700
chr4:+:154215580-154216464	4	+	154215581	154216464	chr4:+:154197282-154216464;chr4:+:154215637-154216464	TRIM2	ENSG00000109654	ENST00000338700
chr4:+:154243930-154245229	4	+	154243931	154245229	chr4:+:154243968-154245229	TRIM2	ENSG00000109654	ENST00000338700
chr4:+:159605825-159606303	4	+	159605826	159606303	chr4:+:159605825-159606252	ETFDH	ENSG00000171503	ENST00000307738
chr4:+:159780410-159780746	4	+	159780411	159780746	chr4:+:159780410-159780729	FNIP2	ENSG00000052795	ENST00000264433
chr4:+:20270504-20283051	4	+	20270505	20283051	chr4:+:20270504-20469374	SLIT2	ENSG00000145147	ENST00000504154
chr4:+:2926853-2927740	4	+	2926854	2927740	chr4:+:2910331-2927740;chr4:+:2916767-2927740	ADD1	ENSG00000087274	ENST00000398129
chr4:+:37904133-37931461	4	+	37904134	37931461	chr4:+:37904133-37953626;chr4:+:37904133-38016129	TBC1D1	ENSG00000065882	ENST00000261439;ENST00000510573
chr4:+:41673611-41682022	4	+	41673612	41682022	chr4:+:41665001-41682022;chr4:+:41673611-41678395;chr4:+:41673611-41678398;chr4:+:41678479-41682022	LIMCH1	ENSG00000064042	ENST00000381753
chr4:+:42003797-42020130	4	+	42003798	42020130	chr4:+:42003797-42020127	SLC30A9	ENSG00000014824	ENST00000264451;ENST00000513699
chr4:+:47571144-47574170	4	+	47571145	47574170	chr4:+:47571163-47574170	ATP10D	ENSG00000145246	ENST00000273859
chr4:+:47575014-47578838	4	+	47575015	47578838	chr4:+:47575014-47578789	ATP10D	ENSG00000145246	ENST00000273859
chr4:+:47584081-47589096	4	+	47584082	47589096	chr4:+:47584081-47584885;chr4:+:47584081-47589035	ATP10D	ENSG00000145246	ENST00000273859
chr4:+:48989089-48990493	4	+	48989090	48990493	chr4:+:48988489-48990493;chr4:+:48988802-48990493	CWH43	ENSG00000109182	ENST00000226432
chr4:+:49000565-49009217	4	+	49000566	49009217	chr4:+:49000565-49005751;chr4:+:49006009-49009217	CWH43	ENSG00000109182	ENST00000226432
chr4:+:49034789-49040052	4	+	49034790	49040052	chr4:+:49034732-49040052	CWH43	ENSG00000109182	ENST00000226432
chr4:+:49052866-49059264	4	+	49052867	49059264	chr4:+:49052866-49063828	CWH43	ENSG00000109182	ENST00000226432
chr4:+:55565932-55569886	4	+	55565933	55569886	chr4:+:55565932-55569889	KIT	ENSG00000157404	ENST00000288135
chr4:+:68441216-68447022	4	+	68441217	68447022	chr4:+:68441216-68442920;chr4:+:68442977-68447022	STAP1	ENSG00000035720	ENST00000265404
chr4:+:68442661-68442920	4	+	68442662	68442920	chr4:+:68441216-68442920	STAP1	ENSG00000035720	ENST00000265404
chr4:+:68449420-68454049	4	+	68449421	68454049	chr4:+:68449420-68456601	STAP1	ENSG00000035720	ENST00000265404
chr4:+:68456671-68472013	4	+	68456672	68472013	chr4:+:68456671-68458977;chr4:+:68459074-68472013	STAP1	ENSG00000035720	ENST00000265404
chr4:+:6873409-6882513	4	+	6873410	6882513	chr4:+:6873409-6878386;chr4:+:6878484-6882513	KIAA0232	ENSG00000170871	ENST00000425103
chr4:+:6929085-6969030	4	+	6929086	6969030	chr4:+:6925838-6969030;chr4:+:6956065-6969030	TBC1D14	ENSG00000132405	ENST00000409757
chr4:+:6930454-6969030	4	+	6930455	6969030	chr4:+:6925838-6969030;chr4:+:6956065-6969030	TBC1D14	ENSG00000132405	ENST00000409757
chr4:+:6968919-6969030	4	+	6968920	6969030	chr4:+:6925838-6969030;chr4:+:6956065-6969030	TBC1D14	ENSG00000132405	ENST00000409757;ENST00000410031
chr4:+:6998134-7000813	4	+	6998135	7000813	chr4:+:6998134-7000811	TBC1D14	ENSG00000132405	ENST00000409757;ENST00000410031
chr4:+:7049866-7050189	4	+	7049867	7050189	no.hit	TADA2B	ENSG00000173011	ENST00000310074
chr4:+:7050245-7050595	4	+	7050246	7050595	no.hit	TADA2B	ENSG00000173011	ENST00000310074
chr4:+:76711950-76714848	4	+	76711951	76714848	chr4:+:76711950-76714842	USO1	ENSG00000138768	ENST00000514213
chr4:+:85562143-85566374	4	+	85562144	85566374	chr4:+:85562143-85564176;chr4:+:85564296-85566374	CDS1	ENSG00000163624	ENST00000295887
chr4:+:95982784-95983158	4	+	95982785	95983158	no.hit	BMPR1B	ENSG00000138696	ENST00000440890
chr4:+:95983246-95986172	4	+	95983247	95986172	no.hit	BMPR1B	ENSG00000138696	ENST00000440890
chr4:+:95983246-95986872	4	+	95983247	95986872	no.hit	BMPR1B	ENSG00000138696	ENST00000440890
chr4:+:95983246-96025558	4	+	95983247	96025558	chr4:+:95972923-96025558;chr4:+:96012778-96025558	BMPR1B	ENSG00000138696	ENST00000440890
chr4:+:95986245-95986872	4	+	95986246	95986872	no.hit	BMPR1B	ENSG00000138696	ENST00000440890
chr5:-:133328706-133340132	5	-	133328707	133340132	chr5:-:133328706-133340177;chr5:-:133328706-133340337	VDAC1	ENSG00000213585	ENST00000395044;ENST00000395047
chr5:-:141248996-141256175	5	-	141248997	141256175	chr5:-:141248996-141249081;chr5:-:141248996-141257787	PCDH1	ENSG00000156453	ENST00000287008;ENST00000394536
chr5:-:156353323-156378522	5	-	156353324	156378522	chr5:-:156353323-156362501;chr5:-:156353323-156375426;chr5:-:156353323-156376661;chr5:-:156376742-156378522	TIMD4	ENSG00000145850	ENST00000274532
chr5:-:156375331-156375426	5	-	156375332	156375426	chr5:-:156353323-156375426	TIMD4	ENSG00000145850	ENST00000274532
chr5:-:16483581-16505512	5	-	16483582	16505512	chr5:-:16483581-16508686;chr5:-:16483581-16509451;chr5:-:16483581-16565871	FAM134B	ENSG00000154153	ENST00000399793;ENST00000306320
chr5:-:16779754-16780632	5	-	16779755	16780632	chr5:-:16779757-16780632	MYO10	ENSG00000145555	ENST00000513610
chr5:-:32234040-32239106	5	-	32234041	32239106	chr5:-:32230453-32239106;chr5:-:32234040-32235067;chr5:-:32235235-32239106	MTMR12	ENSG00000150712	ENST00000382142
chr5:-:41794180-41794382	5	-	41794181	41794382	chr5:-:41794180-41794268;chr5:-:41794180-41794523;chr5:-:41794180-41794642;chr5:-:41794180-41794778	OXCT1	ENSG00000083720	ENST00000196371;ENST00000512084
chr5:-:42808468-42811939	5	-	42808469	42811939	chr5:-:42808468-42809861;chr5:-:42808468-42810792;chr5:-:42808468-42811937	SEPP1	ENSG00000250722	ENST00000514985;ENST00000507920;ENST00000513303
chr5:-:60080039-60083160	5	-	60080040	60083160	chr5:-:60067920-60083160;chr5:-:60080039-60081650;chr5:-:60081878-60083160	ELOVL7	ENSG00000164181	ENST00000425382
chr5:-:60458183-60458272	5	-	60458184	60458272	chr5:-:60458186-60458272	SMIM15	ENSG00000188725	ENST00000339020;ENST00000507416
chr5:-:81573643-81574138	5	-	81573644	81574138	chr5:-:81573671-81574138	RPS23	ENSG00000186468	ENST00000296674;ENST00000512493
chr5:-:96139642-96143562	5	-	96139643	96143562	chr5:-:96139530-96143562;chr5:-:96139642-96140523;chr5:-:96139646-96143562;chr5:-:96140643-96143562	ERAP1	ENSG00000164307	ENST00000443439
chr5:+:109183420-109190840	5	+	109183421	109190840	chr5:+:109183491-109190840	MAN2A1	ENSG00000112893	ENST00000261483
chr5:+:137677555-137680516	5	+	137677556	137680516	chr5:+:137677555-137680513;chr5:+:137677555-137681084	FAM53C	ENSG00000120709	ENST00000239906
chr5:+:141353300-141354368	5	+	141353301	141354368	chr5:+:141353307-141354368	RNF14	ENSG00000013561	ENST00000394514
chr5:+:141520194-141524154	5	+	141520195	141524154	chr5:+:141520194-141524135	NDFIP1	ENSG00000131507	ENST00000253814
chr5:+:149914587-149915261	5	+	149914588	149915261	chr5:+:149914583-149915261	NDST1	ENSG00000070614	ENST00000261797
chr5:+:44811256-44812047	5	+	44811257	44812047	chr5:+:44811256-44812016	MRPS30	ENSG00000112996	ENST00000507110
chr5:+:72795009-72798312	5	+	72795010	72798312	chr5:+:72794383-72798312;chr5:+:72795027-72798312	BTF3	ENSG00000145741	ENST00000335895;ENST00000380591
chr5:+:74647140-74647341	5	+	74647141	74647341	chr5:+:74647140-74647248	HMGCR	ENSG00000113161	ENST00000287936
chr5:+:95088054-95099211	5	+	95088055	95099211	chr5:+:95088054-95091099;chr5:+:95091465-95099211	RHOBTB3	ENSG00000164292	ENST00000379982
chr6:-:129901276-129920360	6	-	129901277	129920360	chr6:-:129901276-129905132;chr6:-:129905257-129920360	ARHGAP18	ENSG00000146376	ENST00000368149
chr6:-:150141839-150157220	6	-	150141840	150157220	chr6:-:150141839-150147399;chr6:-:150147495-150157220	LRP11	ENSG00000120256	ENST00000239367
chr6:-:31236940-31237742	6	-	31236941	31237742	chr6:-:31237302-31237742;chr6:-:31237320-31237742	HLA-C	ENSG00000204525	ENST00000376228;ENST00000376237
chr6:-:31322063-31322255	6	-	31322064	31322255	chr6:-:31322073-31322255	HLA-B	ENSG00000234745	ENST00000412585
chr6:-:38654735-38670746	6	-	38654736	38670746	chr6:-:38654750-38670746	GLO1	ENSG00000124767	ENST00000373365
chr6:-:46214650-46216459	6	-	46214651	46216459	chr6:-:46214656-46216459	RCAN2	ENSG00000172348	ENST00000371374;ENST00000306764
chr6:-:46424715-46459008	6	-	46424716	46459008	chr6:-:46424715-46458909;chr6:-:46424715-46459606	RCAN2	ENSG00000172348	ENST00000371374;ENST00000306764
chr6:-:90087532-90097013	6	-	90087533	90097013	chr6:-:90087532-90088942;chr6:-:90090086-90097013	RRAGD	ENSG00000025039	ENST00000369415;ENST00000359203;ENST00000492783
chr6:-:99994335-99997383	6	-	99994336	99997383	chr6:-:99994350-99997383;chr6:-:99997275-99997383	CCNC	ENSG00000112237	ENST00000369220
chr6:+:125540790-125541223	6	+	125540791	125541223	chr6:+:125475116-125541223;chr6:+:125475678-125541223;chr6:+:125524923-125541223	TPD52L1	ENSG00000111907	ENST00000368402;ENST00000392482
chr6:+:126278034-126288032	6	+	126278035	126288032	chr6:+:126278324-126288032	HINT3	ENSG00000111911	ENST00000229633
chr6:+:137147607-137191027	6	+	137147608	137191027	chr6:+:137147607-137151144;chr6:+:137147607-137166752;chr6:+:137187871-137191027	PEX7	ENSG00000112357	ENST00000318471
chr6:+:137167319-137219279	6	+	137167320	137219279	chr6:+:137167319-137187764;chr6:+:137193391-137219279	PEX7	ENSG00000112357	ENST00000318471
chr6:+:163148311-163235178	6	+	163148312	163235178	chr6:+:163148311-163149191;chr6:+:163149423-163235178	PACRG	ENSG00000112530	ENST00000366889
chr6:+:163148324-163149191	6	+	163148325	163149191	chr6:+:163148311-163149191	PACRG	ENSG00000112530	ENST00000366889
chr6:+:29910336-29910670	6	+	29910337	29910670	no.hit	HLA-A	ENSG00000206503	ENST00000376809
chr6:+:30851706-30851834	6	+	30851707	30851834	out.of.scope	DDR1	ENSG00000204580	ENST00000506573
chr6:+:30867210-30867299	6	+	30867211	30867299	no.hit	DDR1	ENSG00000204580	ENST00000376569;ENST00000452441
chr6:+:38102734-38120010	6	+	38102735	38120010	chr6:+:38084515-38120010;chr6:+:38110980-38120010	ZFAND3	ENSG00000156639	ENST00000373391
chr7:-:11564391-11581045	7	-	11564392	11581045	chr7:-:11487051-11581045;chr7:-:11521609-11581045	THSD7A	ENSG00000005108	ENST00000423059
chr7:-:129471385-129471486	7	-	129471386	129471486	no.hit	UBE2H	ENSG00000186591	ENST00000355621
chr7:-:138482483-138482778	7	-	138482484	138482778	chr7:-:138456009-138482778;chr7:-:138471005-138482778	ATP6V0A4	ENSG00000105929	ENST00000310018
chr7:-:140154208-140154255	7	-	140154209	140154255	no.hit	MKRN1	ENSG00000133606	ENST00000255977
chr7:-:151269795-151273456	7	-	151269796	151273456	chr7:-:151269795-151271976;chr7:-:151272035-151273456	PRKAG2	ENSG00000106617	ENST00000418337
chr7:-:151292534-151329154	7	-	151292535	151329154	chr7:-:151292537-151329154;chr7:-:151292540-151329154;chr7:-:151328854-151329154	PRKAG2	ENSG00000106617	ENST00000418337
chr7:-:47319952-47323335	7	-	47319953	47323335	chr7:-:47319952-47323294	TNS3	ENSG00000136205	ENST00000311160
chr7:-:5434226-5463071	7	-	5434227	5463071	chr7:-:5434226-5446780;chr7:-:5434226-5460690;chr7:-:5461120-5463071	TNRC18	ENSG00000182095	ENST00000430969
chr7:-:5692141-5742700	7	-	5692142	5742700	chr7:-:5692141-5751391	RNF216	ENSG00000011275	ENST00000425013
chr7:-:72727665-72730563	7	-	72727666	72730563	chr7:-:72727506-72730563	TRIM50	ENSG00000146755	ENST00000333149;ENST00000453152
chr7:-:72730683-72732685	7	-	72730684	72732685	chr7:-:72730688-72732685	TRIM50	ENSG00000146755	ENST00000333149;ENST00000453152
chr7:-:72730688-72732820	7	-	72730689	72732820	chr7:-:72730688-72732685;chr7:-:72732708-72732820	TRIM50	ENSG00000146755	ENST00000333149;ENST00000453152
chr7:-:72733051-72738386	7	-	72733052	72738386	chr7:-:72733051-72734145;chr7:-:72734241-72738386;chr7:-:72735980-72738386	TRIM50	ENSG00000146755	ENST00000333149;ENST00000453152
chr7:-:72733073-72734145	7	-	72733074	72734145	chr7:-:72733051-72734145	TRIM50	ENSG00000146755	ENST00000333149;ENST00000453152
chr7:-:72735980-72736088	7	-	72735981	72736088	chr7:-:72735980-72738386	TRIM50	ENSG00000146755	ENST00000333149;ENST00000453152
chr7:-:80387798-80390931	7	-	80387799	80390931	chr7:-:80387804-80390931	SEMA3C	ENSG00000075223	ENST00000265361
chr7:-:97498491-97501662	7	-	97498492	97501662	chr7:-:97493808-97501662;chr7:-:97498417-97501662;chr7:-:97498491-97499089;chr7:-:97499125-97501662;chr7:-:97501308-97501662	ASNS	ENSG00000070669	ENST00000394308
chr7:-:97939904-97941411	7	-	97939905	97941411	chr7:-:97939904-97941408	BAIAP2L1	ENSG00000006453	ENST00000005260
chr7:+:116312631-116371721	7	+	116312632	116371721	chr7:+:116312631-116335803;chr7:+:116312631-116339124;chr7:+:116340338-116371721;chr7:+:116364901-116371721	MET	ENSG00000105976	ENST00000397752
chr7:+:116380138-116380989	7	+	116380139	116380989	chr7:+:116380138-116380905	MET	ENSG00000105976	ENST00000397752
chr7:+:116399544-116403163	7	+	116399545	116403163	chr7:+:116399544-116403103	MET	ENSG00000105976	ENST00000397752
chr7:+:117120455-117144306	7	+	117120456	117144306	chr7:+:117120201-117144306	CFTR	ENSG00000001626	ENST00000003084
chr7:+:117144417-117145208	7	+	117144418	117145208	chr7:+:117144417-117149087	CFTR	ENSG00000001626	ENST00000003084
chr7:+:117145282-117149087	7	+	117145283	117149087	chr7:+:117144417-117149087	CFTR	ENSG00000001626	ENST00000003084
chr7:+:117227887-117231987	7	+	117227888	117231987	chr7:+:117227887-117230406;chr7:+:117230493-117231987	CFTR	ENSG00000001626	ENST00000003084
chr7:+:117232711-117242879	7	+	117232712	117242879	chr7:+:117232711-117234983;chr7:+:117235112-117242879	CFTR	ENSG00000001626	ENST00000003084
chr7:+:117267624-117282491	7	+	117267625	117282491	chr7:+:117267824-117282491	CFTR	ENSG00000001626	ENST00000003084
chr7:+:117305618-117306701	7	+	117305619	117306701	chr7:+:117305618-117306961	CFTR	ENSG00000001626	ENST00000003084
chr7:+:117305618-117306968	7	+	117305619	117306968	chr7:+:117305618-117306961	CFTR	ENSG00000001626	ENST00000003084
chr7:+:138487810-138488087	7	+	138487811	138488087	no.hit	TMEM213	ENSG00000214128	ENST00000442682
chr7:+:150107146-150107247	7	+	150107147	150107247	chr7:+:150098060-150107247;chr7:+:150101760-150107247;chr7:+:150102405-150107247;chr7:+:150102992-150107247;chr7:+:150104951-150107247;chr7:+:150105576-150107247	ZNF775	ENSG00000196456	ENST00000476489
chr7:+:23300392-23301100	7	+	23300393	23301100	chr7:+:23300392-23306099;chr7:+:23300392-23306135	GPNMB	ENSG00000136235	ENST00000258733;ENST00000381990
chr7:+:23301184-23306135	7	+	23301185	23306135	chr7:+:23300392-23306135	GPNMB	ENSG00000136235	ENST00000258733;ENST00000381990
chr7:+:44658979-44663915	7	+	44658980	44663915	chr7:+:44646252-44663915;chr7:+:44662474-44663915	OGDH	ENSG00000105953	ENST00000222673
chr7:+:45104245-45108046	7	+	45104246	45108046	chr7:+:45104245-45108041;chr7:+:45104245-45109424;chr7:+:45104245-45112324	CCM2	ENSG00000136280	ENST00000541586
chr7:+:5340265-5342427	7	+	5340266	5342427	chr7:+:5340293-5342427	SLC29A4	ENSG00000164638	ENST00000297195
chr7:+:5340293-5342457	7	+	5340294	5342457	chr7:+:5340293-5342427;chr7:+:5340293-5342846	SLC29A4	ENSG00000164638	ENST00000297195
chr7:+:6618351-6621237	7	+	6618352	6621237	chr7:+:6618351-6620185;chr7:+:6620309-6621237	ZDHHC4	ENSG00000136247	ENST00000396707;ENST00000335965
chr7:+:71036387-71043510	7	+	71036388	71043510	chr7:+:71036387-71130395	WBSCR17	ENSG00000185274	ENST00000333538
chr7:+:71142291-71169492	7	+	71142292	71169492	chr7:+:71142291-71175745	WBSCR17	ENSG00000185274	ENST00000333538
chr8:-:125565905-125567982	8	-	125565906	125567982	chr8:-:125565933-125567982	MTSS1	ENSG00000170873	ENST00000518547
chr8:-:125565927-125567982	8	-	125565928	125567982	chr8:-:125565933-125567982	MTSS1	ENSG00000170873	ENST00000518547
chr8:-:12580759-12583235	8	-	12580760	12583235	chr8:-:12580763-12583235	LONRF1	ENSG00000154359	ENST00000526680
chr8:-:141711121-141712748	8	-	141711122	141712748	chr8:-:141711121-141712668;chr8:-:141711121-141716217	PTK2	ENSG00000169398	ENST00000523539
chr8:-:145678794-145687665	8	-	145678795	145687665	chr8:-:145678843-145687665	CYHR1	ENSG00000187954	ENST00000528558
chr8:-:19442831-19459281	8	-	19442832	19459281	chr8:-:19363641-19459281;chr8:-:19442828-19459281;chr8:-:19442831-19445439;chr8:-:19445534-19459281;chr8:-:19448789-19459281	CSGALNACT1	ENSG00000147408	ENST00000332246
chr8:-:68137268-68138316	8	-	68137269	68138316	chr8:-:68137268-68138257	ARFGEF1	ENSG00000066777	ENST00000262215
chr8:-:77896429-77898422	8	-	77896430	77898422	chr8:-:77896431-77898422	PEX2	ENSG00000164751	ENST00000522527
chr8:-:97269307-97270584	8	-	97269308	97270584	chr8:-:97269342-97270584	MTERFD1	ENSG00000156469	ENST00000287025
chr8:-:99057310-99057574	8	-	99057311	99057574	chr8:-:99055003-99057574;chr8:-:99057316-99057574	RPL30	ENSG00000156482	ENST00000396070;ENST00000518850;ENST00000287038
chr8:+:104195699-104225146	8	+	104195700	104225146	chr8:+:104153285-104225146;chr8:+:104165538-104225146;chr8:+:104212990-104225146;chr8:+:104220725-104225146	BAALC	ENSG00000164929	ENST00000309982
chr8:+:145161866-145161998	8	+	145161867	145161998	chr8:+:145161866-145161990	MAF1	ENSG00000179632	ENST00000322428
chr8:+:145582725-145582847	8	+	145582726	145582847	chr8:+:145582318-145582847;chr8:+:145582725-145582843	SLC52A2	ENSG00000185803	ENST00000530047;ENST00000532887
chr8:+:21927845-21929842	8	+	21927846	21929842	chr8:+:21927845-21929836	DMTN	ENSG00000158856	ENST00000381470;ENST00000523782;ENST00000265800
chr8:+:55060104-55060202	8	+	55060105	55060202	no.hit	MRPL15	ENSG00000137547	ENST00000260102
chr8:+:64081373-64081945	8	+	64081374	64081945	chr8:+:64081460-64081945;chr8:+:64081567-64081945;chr8:+:64081664-64081945;chr8:+:64081670-64081945	YTHDF3	ENSG00000185728	ENST00000539294
chr8:+:79428703-79470577	8	+	79428704	79470577	chr8:+:79428703-79485045;chr8:+:79428703-79510592	PKIA	ENSG00000171033	ENST00000396418;ENST00000352966
chr8:+:79470791-79485045	8	+	79470792	79485045	chr8:+:79428703-79485045	PKIA	ENSG00000171033	ENST00000396418;ENST00000352966
chr8:+:79479829-79485045	8	+	79479830	79485045	chr8:+:79428703-79485045	PKIA	ENSG00000171033	ENST00000396418;ENST00000352966
chr8:+:86376327-86377500	8	+	86376328	86377500	chr8:+:86376344-86377500	CA2	ENSG00000104267	ENST00000285379;ENST00000520127
chr8:+:87155183-87162404	8	+	87155184	87162404	chr8:+:87155183-87162340	ATP6V0D2	ENSG00000147614	ENST00000285393
chr8:+:87165444-87165551	8	+	87165445	87165551	no.hit	ATP6V0D2	ENSG00000147614	ENST00000285393
chr8:+:87355159-87386258	8	+	87355160	87386258	chr8:+:87355159-87381167;chr8:+:87381260-87386258	WWP1	ENSG00000123124	ENST00000517970
chr8:+:87410708-87410803	8	+	87410709	87410803	chr8:+:87410708-87410800	WWP1	ENSG00000123124	ENST00000517970;ENST00000265428
chr8:+:87447756-87450813	8	+	87447757	87450813	chr8:+:87447756-87447861;chr8:+:87447933-87450813	WWP1	ENSG00000123124	ENST00000517970;ENST00000265428
chr8:+:87473549-87474006	8	+	87473550	87474006	chr8:+:87473549-87474002	WWP1	ENSG00000123124	ENST00000517970;ENST00000265428
chr8:+:92261641-92261846	8	+	92261642	92261846	chr8:+:92261641-92261766	SLC26A7	ENSG00000147606	ENST00000276609
chr8:+:92262072-92274286	8	+	92262073	92274286	chr8:+:92262072-92301363	SLC26A7	ENSG00000147606	ENST00000276609
chr8:+:92262072-92307758	8	+	92262073	92307758	chr8:+:92262072-92301363;chr8:+:92301474-92307758	SLC26A7	ENSG00000147606	ENST00000276609
chr8:+:92274405-92274672	8	+	92274406	92274672	no.hit	SLC26A7	ENSG00000147606	ENST00000276609
chr8:+:92307931-92318962	8	+	92307932	92318962	chr8:+:92307931-92330443	SLC26A7	ENSG00000147606	ENST00000276609
chr8:+:92307931-92346522	8	+	92307932	92346522	chr8:+:92307931-92330443;chr8:+:92330608-92346522	SLC26A7	ENSG00000147606	ENST00000276609
chr8:+:92352704-92355580	8	+	92352705	92355580	chr8:+:92352779-92355580;chr8:+:92355411-92355580	SLC26A7	ENSG00000147606	ENST00000276609
chr8:+:92355694-92356169	8	+	92355695	92356169	chr8:+:92355694-92364037	SLC26A7	ENSG00000147606	ENST00000276609;ENST00000520249
chr8:+:92355694-92360526	8	+	92355695	92360526	chr8:+:92355694-92364037	SLC26A7	ENSG00000147606	ENST00000276609;ENST00000520249
chr8:+:92356233-92364037	8	+	92356234	92364037	chr8:+:92355694-92364037	SLC26A7	ENSG00000147606	ENST00000276609;ENST00000520249
chr8:+:92382061-92401568	8	+	92382062	92401568	chr8:+:92382061-92401565	SLC26A7	ENSG00000147606	ENST00000276609;ENST00000520249
chr9:-:111853432-111855754	9	-	111853433	111855754	chr9:-:111853435-111855754	TMEM245	ENSG00000106771	ENST00000374586
chr9:-:119903754-119976636	9	-	119903755	119976636	chr9:-:119858430-119976636;chr9:-:119903757-119976636	ASTN2	ENSG00000148219	ENST00000373986
chr9:-:130716204-130732596	9	-	130716205	130732596	chr9:-:130716204-130726000;chr9:-:130716204-130742270	FAM102A	ENSG00000167106	ENST00000373095
chr9:-:130941231-130941315	9	-	130941232	130941315	no.hit	CIZ1	ENSG00000148337	ENST00000372938
chr9:-:139913710-139914787	9	-	139913711	139914787	chr9:-:139913758-139914787	ABCA2	ENSG00000107331	ENST00000341511
chr9:-:19376587-19378365	9	-	19376588	19378365	chr9:-:19376649-19378365	RPS6	ENSG00000137154	ENST00000380394;ENST00000315377
chr9:-:34379730-34380334	9	-	34379731	34380334	chr9:-:34379730-34380894;chr9:-:34379730-34380899;chr9:-:34379730-34381053	C9orf24	ENSG00000164972	ENST00000379133
chr9:-:34381442-34381568	9	-	34381443	34381568	chr9:-:34381442-34381523	C9orf24	ENSG00000164972	ENST00000379133
chr9:-:35090274-35090462	9	-	35090275	35090462	chr9:-:35089447-35090462;chr9:-:35090277-35090462;chr9:-:35090281-35090462	PIGO	ENSG00000165282	ENST00000378617;ENST00000361778
chr9:-:35095973-35096557	9	-	35095974	35096557	chr9:-:35095563-35096557;chr9:-:35095973-35096151;chr9:-:35096477-35096557	PIGO	ENSG00000165282	ENST00000361778
chr9:-:5787301-5787429	9	-	5787302	5787429	chr9:-:5787308-5787429	ERMP1	ENSG00000099219	ENST00000214893;ENST00000339450
chr9:-:84235472-84267128	9	-	84235473	84267128	chr9:-:84235472-84248262;chr9:-:84249216-84267128	TLE1	ENSG00000196781	ENST00000376499
chr9:-:86593367-86594685	9	-	86593368	86594685	chr9:-:86593367-86595067;chr9:-:86593367-86595417	HNRNPK	ENSG00000165119	ENST00000376281;ENST00000360384;ENST00000457156
chr9:+:1050482-1050701	9	+	1050483	1050701	chr9:+:1050482-1050619	DMRT2	ENSG00000173253	ENST00000412350
chr9:+:1053108-1053721	9	+	1053109	1053721	chr9:+:1052138-1053721	DMRT2	ENSG00000173253	ENST00000412350;ENST00000302441
chr9:+:116123017-116124651	9	+	116123018	116124651	chr9:+:116123017-116124648	BSPRY	ENSG00000119411	ENST00000374183
chr9:+:124483133-124519291	9	+	124483134	124519291	chr9:+:124441060-124519291;chr9:+:124461737-124519291;chr9:+:124505200-124519291;chr9:+:124515375-124519291	DAB2IP	ENSG00000136848	ENST00000408936;ENST00000373782
chr9:+:125703367-125719289	9	+	125703368	125719289	chr9:+:125703367-125707610;chr9:+:125703372-125719289;chr9:+:125707711-125719289	RABGAP1	ENSG00000011454	ENST00000373647
chr9:+:125852430-125852553	9	+	125852431	125852553	chr9:+:125852129-125852553	RABGAP1	ENSG00000011454	ENST00000373647
chr9:+:131566398-131568200	9	+	131566399	131568200	chr9:+:131566398-131568137	TBC1D13	ENSG00000107021	ENST00000372648
chr9:+:132395080-132396336	9	+	132395081	132396336	chr9:+:132395080-132396332	NTMT1	ENSG00000148335	ENST00000372483;ENST00000372481
chr9:+:134361569-134362601	9	+	134361570	134362601	chr9:+:134361569-134362553	PRRC2B	ENSG00000130723	ENST00000357304
chr9:+:139249252-139250141	9	+	139249253	139250141	chr9:+:139247607-139250141;chr9:+:139249474-139250141	GPSM1	ENSG00000160360	ENST00000429455
chr9:+:139611665-139612028	9	+	139611666	139612028	chr9:+:139607180-139612028	FAM69B	ENSG00000165716	ENST00000371692
chr9:+:2086897-2088499	9	+	2086898	2088499	chr9:+:2087071-2088499	SMARCA2	ENSG00000080503	ENST00000382194
chr9:+:2645745-2646398	9	+	2645746	2646398	chr9:+:2645745-2646333	VLDLR	ENSG00000147852	ENST00000382099
chr9:+:35829952-35835007	9	+	35829953	35835007	chr9:+:35829952-35834457;chr9:+:35829952-35841130;chr9:+:35834647-35835007	TMEM8B	ENSG00000137103	ENST00000377988
chr9:+:35845882-35845971	9	+	35845883	35845971	chr9:+:35835438-35845971;chr9:+:35842714-35845971	TMEM8B	ENSG00000137103	ENST00000377988
chr9:+:35846070-35846254	9	+	35846071	35846254	chr9:+:35846065-35846254	TMEM8B	ENSG00000137103	ENST00000377988
chr9:+:91965626-91972325	9	+	91965627	91972325	chr9:+:91965767-91972325	SECISBP2	ENSG00000187742	ENST00000375807
chrX:-:119393814-119402098	X	-	119393815	119402098	chrX:-:119394883-119402098	TMEM255A	ENSG00000125355	ENST00000371369
chrX:-:119402242-119418981	X	-	119402243	119418981	chrX:-:119402242-119410739;chrX:-:119402242-119421008;chrX:-:119410902-119418981	TMEM255A	ENSG00000125355	ENST00000371369
chrX:-:119427906-119438184	X	-	119427907	119438184	chrX:-:119427906-119438203	TMEM255A	ENSG00000125355	ENST00000371369
chrX:-:128945485-128947636	X	-	128945486	128947636	chrX:-:128945485-128946693	ZDHHC9	ENSG00000188706	ENST00000357166;ENST00000371064
chrX:-:1510993-1511369	X	-	1510994	1511369	no.hit	SLC25A6	ENSG00000169100	ENST00000381401
chrX:-:153631477-153631609	X	-	153631478	153631609	chrX:-:153631531-153631609	DNASE1L1	ENSG00000013563	ENST00000369807
chrX:-:153764393-153769534	X	-	153764394	153769534	chrX:-:153764393-153774250	G6PD	ENSG00000160211	ENST00000393564
chrX:-:2861240-2871183	X	-	2861241	2871183	chrX:-:2861240-2864038;chrX:-:2867768-2871183;chrX:-:2871033-2871183	ARSE	ENSG00000157399	ENST00000381134
chrX:-:9694016-9707524	X	-	9694017	9707524	chrX:-:9693880-9707524;chrX:-:9706625-9707524	GPR143	ENSG00000101850	ENST00000467482
chrX:-:9711695-9714083	X	-	9711696	9714083	chrX:-:9711713-9714083	GPR143	ENSG00000101850	ENST00000467482
chrX:+:118603944-118604058	X	+	118603945	118604058	no.hit	SLC25A5	ENSG00000005022	ENST00000317881
chrX:+:148627046-148627239	X	+	148627047	148627239	chrX:+:148627046-148627147;chrX:+:148627046-148627313	CXorf40A	ENSG00000197620	ENST00000423421
chrX:+:150153098-150154067	X	+	150153099	150154067	chrX:+:150149117-150154067;chrX:+:150151849-150154067;chrX:+:150152064-150154067	HMGB3	ENSG00000029993	ENST00000419110
chrX:+:150155692-150156249	X	+	150155693	150156249	chrX:+:150155775-150156249	HMGB3	ENSG00000029993	ENST00000419110
chrX:+:16754355-16759841	X	+	16754356	16759841	chrX:+:16754355-16759838	SYAP1	ENSG00000169895	ENST00000380155
chrX:+:16754355-16759844	X	+	16754356	16759844	chrX:+:16754355-16759838	SYAP1	ENSG00000169895	ENST00000380155
chrX:+:19369525-19371208	X	+	19369526	19371208	chrX:+:19369525-19371199	PDHA1	ENSG00000131828	ENST00000422285;ENST00000355808;ENST00000379805
chrX:+:49099647-49099749	X	+	49099648	49099749	chrX:+:49099650-49099749	CCDC22	ENSG00000101997	ENST00000376227
chr1:-:151785819-151785963	1	-	151785820	151785963	chr1:-:151785822-151785963	RORC	ENSG00000143365	ENST00000356728
chr1:-:152006262-152009388	1	-	152006263	152009388	chr1:-:152006276-152009388	S100A11	ENSG00000163191	ENST00000271638
chr1:-:153507829-153508424	1	-	153507830	153508424	chr1:-:153507836-153508424;chr1:-:153507851-153508424	S100A6	ENSG00000197956	ENST00000368719
chr1:-:153507836-153508605	1	-	153507837	153508605	chr1:-:153507836-153508264;chr1:-:153507836-153508424	S100A6	ENSG00000197956	ENST00000368719
chr1:-:153508409-153508592	1	-	153508410	153508592	chr1:-:153508409-153508583	S100A6	ENSG00000197956	ENST00000368719
chr1:-:154924397-154925927	1	-	154924398	154925927	chr1:-:154924397-154926146	PBXIP1	ENSG00000163346	ENST00000368463
chr1:-:21938309-21939668	1	-	21938310	21939668	chr1:-:21938309-21938518;chr1:-:21938602-21939668	RAP1GAP	ENSG00000076864	ENST00000374761;ENST00000471600;ENST00000374765
chr1:+:15500656-15541390	1	+	15500657	15541390	chr1:+:15479280-15541390;chr1:+:15480450-15541390;chr1:+:15537058-15541390	TMEM51	ENSG00000171729	ENST00000428417;ENST00000376014;ENST00000376008
chr1:+:156347310-156347780	1	+	156347311	156347780	chr1:+:156347278-156347780	RHBG	ENSG00000132677	ENST00000537040
chr1:+:16370652-16370980	1	+	16370653	16370980	chr1:+:16370375-16370980	CLCNKB	ENSG00000184908	ENST00000375679
chr1:+:16375740-16376114	1	+	16375741	16376114	chr1:+:16375740-16376112	CLCNKB	ENSG00000184908	ENST00000375679;ENST00000375667
chr1:+:16378042-16378692	1	+	16378043	16378692	chr1:+:16378042-16378204;chr1:+:16378315-16378692	CLCNKB	ENSG00000184908	ENST00000375679;ENST00000375667
chr1:+:169099328-169100604	1	+	169099329	169100604	chr1:+:169099328-169100529	ATP1B1	ENSG00000143153	ENST00000367816;ENST00000367815
chr1:+:20964434-20964524	1	+	20964435	20964524	no.hit	PINK1	ENSG00000158828	ENST00000321556
chr1:+:24020403-24022287	1	+	24020404	24022287	chr1:+:24020403-24021149;chr1:+:24021281-24022287	RPL11	ENSG00000142676	ENST00000374550
chr1:+:26066662-26073158	1	+	26066663	26073158	chr1:+:26013027-26073158;chr1:+:26036636-26073158	MAN1C1	ENSG00000117643	ENST00000263979
chr1:+:55464614-55464799	1	+	55464615	55464799	no.hit	BSND	ENSG00000162399	ENST00000371265
chr10:-:125506533-125508399	10	-	125506534	125508399	chr10:-:125506533-125514178	CPXM2	ENSG00000121898	ENST00000241305
chr10:-:126370948-126375375	10	-	126370949	126375375	chr10:-:126370948-126384726	FAM53B	ENSG00000189319	ENST00000337318
chr10:-:73577233-73577324	10	-	73577234	73577324	chr10:-:73577233-73578373	PSAP	ENSG00000197746	ENST00000394936
chr10:-:73577459-73578373	10	-	73577460	73578373	chr10:-:73577233-73578373	PSAP	ENSG00000197746	ENST00000394936
chr10:-:73578481-73579221	10	-	73578482	73579221	chr10:-:73578481-73578787;chr10:-:73578868-73579221	PSAP	ENSG00000197746	ENST00000394936
chr10:-:73581764-73583814	10	-	73581765	73583814	chr10:-:73581764-73585593	PSAP	ENSG00000197746	ENST00000394936
chr10:-:99625471-99633816	10	-	99625472	99633816	chr10:-:99625471-99640005	CRTAC1	ENSG00000095713	ENST00000413387;ENST00000370597
chr10:-:99625471-99639540	10	-	99625472	99639540	chr10:-:99625471-99640005	CRTAC1	ENSG00000095713	ENST00000413387;ENST00000370597
chr10:-:99631047-99640005	10	-	99631048	99640005	chr10:-:99625471-99640005;chr10:-:99638446-99640005;chr10:-:99639558-99640005	CRTAC1	ENSG00000095713	ENST00000413387;ENST00000370597
chr10:-:99633964-99640005	10	-	99633965	99640005	chr10:-:99625471-99640005;chr10:-:99638446-99640005;chr10:-:99639558-99640005	CRTAC1	ENSG00000095713	ENST00000413387;ENST00000370597
chr10:-:99661321-99664425	10	-	99661322	99664425	chr10:-:99661396-99664425	CRTAC1	ENSG00000095713	ENST00000413387;ENST00000370597
chr10:-:99695742-99695926	10	-	99695743	99695926	chr10:-:99683157-99695926	CRTAC1	ENSG00000095713	ENST00000413387;ENST00000370597
chr10:+:4986466-4991931	10	+	4986467	4991931	no.hit	AKR1C1	ENSG00000187134	ENST00000434459
chr10:+:4986518-4988447	10	+	4986519	4988447	no.hit	AKR1C1	ENSG00000187134	ENST00000434459
chr10:+:4986518-4988497	10	+	4986519	4988497	no.hit	AKR1C1	ENSG00000187134	ENST00000434459
chr10:+:5003475-5003962	10	+	5003476	5003962	no.hit	AKR1C1	ENSG00000187134	ENST00000434459
chr11:-:111169391-111170632	11	-	111169392	111170632	chr11:-:111169391-111170318;chr11:-:111169391-111170667	COLCA1	ENSG00000196167	ENST00000526150
chr11:-:117691087-117691165	11	-	117691088	117691165	chr11:-:117691087-117691380;chr11:-:117691087-117691380	FXYD2	ENSG00000137731	ENST00000528014;ENST00000292079;ENST00000260287;ENST00000534383
chr11:-:117691087-117691165	11	-	117691088	117691165	chr11:-:117691087-117691380;chr11:-:117691087-117691380	FXYD2	ENSG00000137731	ENST00000528014;ENST00000292079;ENST00000260287;ENST00000534383
chr11:-:117691087-117691573	11	-	117691088	117691573	chr11:-:117691087-117691380;chr11:-:117691087-117691380;chr11:-:117691411-117691573	FXYD2	ENSG00000137731	ENST00000528014;ENST00000292079;ENST00000260287;ENST00000534383
chr11:-:117691218-117691380	11	-	117691219	117691380	chr11:-:117691087-117691380;chr11:-:117691087-117691380	FXYD2	ENSG00000137731	ENST00000528014;ENST00000292079;ENST00000260287;ENST00000534383
chr11:-:117691218-117691380	11	-	117691219	117691380	chr11:-:117691087-117691380;chr11:-:117691087-117691380	FXYD2	ENSG00000137731	ENST00000528014;ENST00000292079;ENST00000260287;ENST00000534383
chr11:-:117691606-117693116	11	-	117691607	117693116	no.hit	FXYD2	ENSG00000137731	ENST00000528014;ENST00000292079;ENST00000260287;ENST00000534383;ENST00000533281
chr11:-:117691606-117693120	11	-	117691607	117693120	chr11:-:117691610-117693120	FXYD2	ENSG00000137731	ENST00000528014;ENST00000292079;ENST00000260287;ENST00000534383;ENST00000533281
chr11:-:117691606-117693393	11	-	117691607	117693393	chr11:-:117691610-117693393;chr11:-:117693195-117693393	FXYD2	ENSG00000137731	ENST00000528014;ENST00000292079;ENST00000260287;ENST00000534383;ENST00000533281
chr11:-:117691610-117692150	11	-	117691611	117692150	chr11:-:117691610-117693120;chr11:-:117691610-117693393	FXYD2	ENSG00000137731	ENST00000528014;ENST00000292079;ENST00000260287;ENST00000534383;ENST00000533281
chr11:-:117692243-117693120	11	-	117692244	117693120	chr11:-:117691610-117693120	FXYD2	ENSG00000137731	ENST00000528014;ENST00000292079;ENST00000260287;ENST00000534383;ENST00000533281;ENST00000317594
chr11:-:117693322-117693393	11	-	117693323	117693393	chr11:-:117691610-117693393;chr11:-:117693195-117693393	FXYD2	ENSG00000137731	ENST00000528014;ENST00000292079;ENST00000260287;ENST00000534383;ENST00000533281;ENST00000317594
chr11:-:117693425-117698709	11	-	117693426	117698709	chr11:-:117693432-117698709	FXYD2	ENSG00000137731	ENST00000528014;ENST00000260287
chr11:-:117693432-117693725	11	-	117693433	117693725	chr11:-:117693432-117694876;chr11:-:117693432-117695368;chr11:-:117693432-117698709	FXYD2	ENSG00000137731	ENST00000528014;ENST00000292079;ENST00000260287;ENST00000534383;ENST00000533281;ENST00000317594
chr11:-:117693432-117693849	11	-	117693433	117693849	chr11:-:117693432-117694876;chr11:-:117693432-117695368;chr11:-:117693432-117698709	FXYD2	ENSG00000137731	ENST00000528014;ENST00000292079;ENST00000260287;ENST00000534383;ENST00000533281;ENST00000317594
chr11:-:117693432-117695529	11	-	117693433	117695529	chr11:-:117693432-117694876;chr11:-:117693432-117695368;chr11:-:117693432-117698709	FXYD2	ENSG00000137731	ENST00000528014;ENST00000260287
chr11:-:117693432-117698717	11	-	117693433	117698717	chr11:-:117693432-117694876;chr11:-:117693432-117695368;chr11:-:117693432-117698709	FXYD2	ENSG00000137731	ENST00000528014;ENST00000260287
chr11:-:117693432-117698720	11	-	117693433	117698720	chr11:-:117693432-117694876;chr11:-:117693432-117695368;chr11:-:117693432-117698709	FXYD2	ENSG00000137731	ENST00000528014;ENST00000260287
chr11:-:117694922-117698709	11	-	117694923	117698709	chr11:-:117693432-117698709	FXYD2	ENSG00000137731	ENST00000528014;ENST00000260287
chr11:-:117695064-117695529	11	-	117695065	117695529	no.hit	FXYD2	ENSG00000137731	ENST00000528014;ENST00000260287
chr11:-:117695064-117698709	11	-	117695065	117698709	chr11:-:117693432-117698709	FXYD2	ENSG00000137731	ENST00000528014;ENST00000260287
chr11:-:118888255-118888991	11	-	118888256	118888991	chr11:-:118888255-118888634;chr11:-:118888255-118888667;chr11:-:118888763-118888991	RPS25	ENSG00000118181	ENST00000532567;ENST00000527673
chr11:-:1774911-1775032	11	-	1774912	1775032	chr11:-:1774900-1775032	CTSD	ENSG00000117984	ENST00000236671;ENST00000433655
chr11:-:1775131-1775274	11	-	1775132	1775274	chr11:-:1775131-1775223	CTSD	ENSG00000117984	ENST00000236671;ENST00000433655
chr11:-:1776258-1777504	11	-	1776259	1777504	chr11:-:1776258-1778553	CTSD	ENSG00000117984	ENST00000236671;ENST00000433655
chr11:-:1780863-1782538	11	-	1780864	1782538	chr11:-:1780869-1782538	CTSD	ENSG00000117984	ENST00000236671;ENST00000433655;ENST00000367196
chr11:-:1780869-1781117	11	-	1780870	1781117	chr11:-:1780869-1782538	CTSD	ENSG00000117984	ENST00000236671;ENST00000433655;ENST00000367196
chr11:-:1780869-1782559	11	-	1780870	1782559	chr11:-:1780869-1782538	CTSD	ENSG00000117984	ENST00000236671;ENST00000433655;ENST00000367196
chr11:-:1781400-1782538	11	-	1781401	1782538	chr11:-:1780869-1782538	CTSD	ENSG00000117984	ENST00000236671;ENST00000433655;ENST00000367196
chr11:-:1782698-1783045	11	-	1782699	1783045	chr11:-:1782698-1783362;chr11:-:1782698-1785021	CTSD	ENSG00000117984	ENST00000236671;ENST00000433655;ENST00000367196
chr11:-:61732584-61732869	11	-	61732585	61732869	chr11:-:61732584-61732840	FTH1	ENSG00000167996	ENST00000273550;ENST00000532829;ENST00000534180;ENST00000526640
chr11:-:61732915-61734783	11	-	61732916	61734783	chr11:-:61732987-61734783;chr11:-:61733049-61734783	FTH1	ENSG00000167996	ENST00000273550;ENST00000532829;ENST00000534180;ENST00000526640
chr11:-:62290499-62291105	11	-	62290500	62291105	no.hit	AHNAK	ENSG00000124942	ENST00000378024
chr11:-:62327299-62327540	11	-	62327300	62327540	chr11:-:62327309-62327540	EEF1G	ENSG00000254772	ENST00000329251
chr11:-:71820844-71820926	11	-	71820845	71820926	no.hit	ANAPC15	ENSG00000110200	ENST00000227618;ENST00000538393
chr11:-:72423610-72424220	11	-	72423611	72424220	chr11:-:72423613-72424220	ARAP1	ENSG00000186635	ENST00000455638;ENST00000334211
chr11:+:108002681-108009624	11	+	108002682	108009624	chr11:+:108002681-108004546;chr11:+:108005043-108009624;chr11:+:108005969-108009624	ACAT1	ENSG00000075239	ENST00000265838
chr11:+:108010942-108013163	11	+	108010943	108013163	chr11:+:108010942-108012331;chr11:+:108012427-108013163	ACAT1	ENSG00000075239	ENST00000265838
chr11:+:108014774-108016938	11	+	108014775	108016938	chr11:+:108014774-108016928	ACAT1	ENSG00000075239	ENST00000265838
chr11:+:118277806-118279714	11	+	118277807	118279714	chr11:+:118277691-118279714;chr11:+:118277812-118279714	ATP5L	ENSG00000167283	ENST00000300688;ENST00000533172;ENST00000529460
chr11:+:126147022-126147329	11	+	126147023	126147329	chr11:+:126147070-126147329	FOXRED1	ENSG00000110074	ENST00000263578
chr11:+:129980556-129987691	11	+	129980557	129987691	chr11:+:129980556-129990600;chr11:+:129980556-129996594	APLP2	ENSG00000084234	ENST00000528499;ENST00000263574;ENST00000278756
chr11:+:129990713-129991126	11	+	129990714	129991126	chr11:+:129990713-129991508	APLP2	ENSG00000084234	ENST00000528499;ENST00000263574;ENST00000278756
chr11:+:129991192-129991508	11	+	129991193	129991508	chr11:+:129990713-129991508	APLP2	ENSG00000084234	ENST00000528499;ENST00000263574;ENST00000278756
chr11:+:19138823-19164529	11	+	19138824	19164529	chr11:+:19138823-19139238;chr11:+:19138823-19164524;chr11:+:19138823-19167727	ZDHHC13	ENSG00000177054	ENST00000446113
chr11:+:46695662-46695765	11	+	46695663	46695765	no.hit	ATG13	ENSG00000175224	ENST00000524625
chr11:+:62439337-62439427	11	+	62439338	62439427	chr11:+:62439337-62439424	C11orf83	ENSG00000204922	ENST00000377953
chr11:+:63742266-63743745	11	+	63742267	63743745	chr11:+:63742266-63743696	COX8A	ENSG00000176340	ENST00000314133
chr11:+:64088540-64089009	11	+	64088541	64089009	chr11:+:64088540-64089057	PRDX5	ENSG00000126432	ENST00000265462;ENST00000347941
chr11:+:66276785-66276881	11	+	66276786	66276881	out.of.scope	DPP3	ENSG00000254986	ENST00000541961
chr11:+:68343502-68355394	11	+	68343503	68355394	chr11:+:68343511-68355394;chr11:+:68350597-68355394	PPP6R3	ENSG00000110075	ENST00000393800
chr11:+:8704812-8705536	11	+	8704813	8705536	chr11:+:8704812-8705409;chr11:+:8704812-8705507;chr11:+:8704812-8705552	RPL27A	ENSG00000166441	ENST00000531978;ENST00000524496;ENST00000532359;ENST00000530022;ENST00000526562
chr12:-:110289407-110289652	12	-	110289408	110289652	no.hit	GLTP	ENSG00000139433	ENST00000318348
chr12:-:112438882-112441603	12	-	112438883	112441603	chr12:-:112429693-112441603	TMEM116	ENSG00000198270	ENST00000550831
chr12:-:125396662-125396824	12	-	125396663	125396824	no.hit	UBC	ENSG00000150991	ENST00000538617;ENST00000339647
chr12:-:125397356-125397377	12	-	125397357	125397377	no.hit	UBC	ENSG00000150991	ENST00000538617;ENST00000339647
chr12:-:15070177-15073865	12	-	15070178	15073865	chr12:-:15070237-15073865	ERP27	ENSG00000139055	ENST00000266397;ENST00000540097
chr12:-:15070237-15073815	12	-	15070238	15073815	chr12:-:15070237-15073865	ERP27	ENSG00000139055	ENST00000266397;ENST00000540097
chr12:-:15087927-15088061	12	-	15087928	15088061	chr12:-:15087927-15090885	ERP27	ENSG00000139055	ENST00000266397
chr12:-:15835906-15865782	12	-	15835907	15865782	chr12:-:15835906-15837102;chr12:-:15835906-15837130;chr12:-:15835906-15865786;chr12:-:15835906-15881062;chr12:-:15835906-15933512;chr12:-:15835906-15940896;chr12:-:15835906-15942094	EPS8	ENSG00000151491	ENST00000543468;ENST00000543523;ENST00000281172
chr12:-:21806930-21807476	12	-	21806931	21807476	chr12:-:21799950-21807476	LDHB	ENSG00000111716	ENST00000350669
chr12:-:46580091-46580141	12	-	46580092	46580141	no.hit	SLC38A1	ENSG00000111371	ENST00000398637
chr12:-:53292303-53292456	12	-	53292304	53292456	chr12:-:53292303-53292462	KRT8	ENSG00000170421	ENST00000293308
chr12:-:56120394-56120483	12	-	56120395	56120483	chr12:-:56120045-56120483	CD63	ENSG00000135404	ENST00000552067;ENST00000546939;ENST00000552692;ENST00000549117;ENST00000257857;ENST00000550050
chr12:-:56121113-56122059	12	-	56121114	56122059	chr12:-:56121054-56122059;chr12:-:56121123-56122059	CD63	ENSG00000135404	ENST00000552692;ENST00000549117;ENST00000257857;ENST00000550050
chr12:-:6184717-6202971	12	-	6184718	6202971	chr12:-:6184717-6204625	VWF	ENSG00000110799	ENST00000261405
chr12:-:6457142-6457262	12	-	6457143	6457262	no.hit	SCNN1A	ENSG00000111319	ENST00000360168;ENST00000228916
chr12:-:95365261-95387945	12	-	95365262	95387945	chr12:-:95365261-95396581;chr12:-:95365396-95387945;chr12:-:95366265-95387945	NDUFA12	ENSG00000184752	ENST00000327772
chr12:+:120876324-120878272	12	+	120876325	120878272	chr12:+:120876324-120878256	COX6A1	ENSG00000111775	ENST00000229379
chr12:+:124497022-124497649	12	+	124497023	124497649	no.hit	ZNF664	ENSG00000179195	ENST00000538932;ENST00000337815
chr12:+:3228243-3228343	12	+	3228244	3228343	no.hit	TSPAN9	ENSG00000011105	ENST00000537971;ENST00000011898
chr12:+:48538913-48539016	12	+	48538914	48539016	chr12:+:48538913-48538992	PFKM	ENSG00000152556	ENST00000551804;ENST00000547587
chr12:+:52639416-52641822	12	+	52639417	52641822	chr12:+:52639416-52641960	KRT7	ENSG00000135480	ENST00000331817
chr12:+:52639416-52641923	12	+	52639417	52641923	chr12:+:52639416-52641960	KRT7	ENSG00000135480	ENST00000331817
chr12:+:53689423-53690027	12	+	53689424	53690027	chr12:+:53689423-53689622;chr12:+:53689423-53690213;chr12:+:53689423-53690237;chr12:+:53689423-53691633;chr12:+:53689423-53691828;chr12:+:53689725-53690027	PFDN5	ENSG00000123349	ENST00000351500;ENST00000334478
chr12:+:54678101-54678720	12	+	54678102	54678720	chr12:+:54678101-54678332;chr12:+:54678101-54680445	HNRNPA1	ENSG00000135486	ENST00000547566;ENST00000340913;ENST00000547276
chr12:+:56552495-56553378	12	+	56552496	56553378	chr12:+:56552495-56552685;chr12:+:56552495-56553281;chr12:+:56552495-56553370;chr12:+:56552495-56553406;chr12:+:56552495-56553758	MYL6	ENSG00000092841	ENST00000550697;ENST00000348108;ENST00000547649;ENST00000548400
chr12:+:56553514-56553808	12	+	56553515	56553808	chr12:+:56553406-56553808;chr12:+:56553514-56553758	MYL6	ENSG00000092841	ENST00000550697;ENST00000348108;ENST00000547649;ENST00000548400
chr12:+:57619003-57619457	12	+	57619004	57619457	no.hit	NXPH4	ENSG00000182379	ENST00000349394
chr12:+:6335526-6341797	12	+	6335527	6341797	chr12:+:6334700-6341797;chr12:+:6341560-6341797	CD9	ENSG00000010278	ENST00000009180
chr12:+:6345441-6345778	12	+	6345442	6345778	chr12:+:6345441-6346928	CD9	ENSG00000010278	ENST00000009180
chr12:+:662781-662983	12	+	662782	662983	no.hit	B4GALNT3	ENSG00000139044	ENST00000266383
chr12:+:6645759-6645903	12	+	6645760	6645903	chr12:+:6645759-6645849	GAPDH	ENSG00000111640	ENST00000229239;ENST00000396856;ENST00000396859
chr12:+:6646556-6646782	12	+	6646557	6646782	chr12:+:6646556-6646749	GAPDH	ENSG00000111640	ENST00000229239;ENST00000396856;ENST00000396859
chr12:+:81503483-81528678	12	+	81503484	81528678	chr12:+:81503483-81528594	ACSS3	ENSG00000111058	ENST00000548058;ENST00000261206
chr13:-:45911523-45912796	13	-	45911524	45912796	chr13:-:45911523-45911601;chr13:-:45911523-45912794	TPT1	ENSG00000133112	ENST00000379056;ENST00000379060
chr13:-:45913681-45914128	13	-	45913682	45914128	chr13:-:45912911-45914128;chr13:-:45913737-45914128	TPT1	ENSG00000133112	ENST00000379056;ENST00000379060;ENST00000309246;ENST00000527226
chr14:-:104379025-104380297	14	-	104379026	104380297	chr14:-:104379031-104380297	C14orf2	ENSG00000156411	ENST00000286953;ENST00000553449
chr14:-:21561214-21561323	14	-	21561215	21561323	no.hit	ZNF219	ENSG00000165804	ENST00000421093
chr14:-:50085844-50087279	14	-	50085845	50087279	chr14:-:50085858-50087279	RPL36AL	ENSG00000165502	ENST00000298289
chr14:-:60612385-60616070	14	-	60612386	60616070	chr14:-:60611731-60616070	DHRS7	ENSG00000100612	ENST00000557185
chr14:-:60613945-60616070	14	-	60613946	60616070	chr14:-:60611731-60616070	DHRS7	ENSG00000100612	ENST00000557185
chr14:-:74946975-74947404	14	-	74946976	74947404	chr14:-:74946991-74947404	NPC2	ENSG00000119655	ENST00000555619;ENST00000238633
chr14:-:81956809-81961424	14	-	81956810	81961424	chr14:-:81956809-81958823;chr14:-:81958892-81961424	SEL1L	ENSG00000071537	ENST00000336735
chr14:+:24107626-24108035	14	+	24107627	24108035	chr14:+:24105981-24108035	DHRS2	ENSG00000100867	ENST00000250383
chr14:+:24109062-24112360	14	+	24109063	24112360	chr14:+:24109104-24112360	DHRS2	ENSG00000100867	ENST00000250383
chr14:+:24109104-24109483	14	+	24109105	24109483	chr14:+:24109104-24110874;chr14:+:24109104-24112360	DHRS2	ENSG00000100867	ENST00000250383
chr14:+:24109640-24112360	14	+	24109641	24112360	chr14:+:24109104-24112360	DHRS2	ENSG00000100867	ENST00000250383
chr14:+:24110947-24112360	14	+	24110948	24112360	chr14:+:24109104-24112360	DHRS2	ENSG00000100867	ENST00000250383
chr14:+:24110988-24112360	14	+	24110989	24112360	chr14:+:24109104-24112360	DHRS2	ENSG00000100867	ENST00000250383
chr14:+:55596018-55596172	14	+	55596019	55596172	chr14:+:55596018-55604087;chr14:+:55596018-55604762	LGALS3	ENSG00000131981	ENST00000254301;ENST00000553755
chr14:+:55596018-55599928	14	+	55596019	55599928	chr14:+:55596018-55604087;chr14:+:55596018-55604762	LGALS3	ENSG00000131981	ENST00000254301;ENST00000553755
chr14:+:55607081-55609312	14	+	55607082	55609312	chr14:+:55607081-55609301	LGALS3	ENSG00000131981	ENST00000254301;ENST00000553755;ENST00000556438
chr14:+:55609467-55611812	14	+	55609468	55611812	chr14:+:55609467-55610165;chr14:+:55609467-55611833	LGALS3	ENSG00000131981	ENST00000254301;ENST00000556438
chr14:+:56104076-56104496	14	+	56104077	56104496	chr14:+:56104082-56104496	KTN1	ENSG00000126777	ENST00000438792;ENST00000395314
chr14:+:60581759-60582436	14	+	60581760	60582436	chr14:+:60559137-60582436;chr14:+:60582179-60582436	PCNXL4	ENSG00000126773	ENST00000406854
chr14:+:70478284-70480111	14	+	70478285	70480111	chr14:+:70478284-70480102	SMOC1	ENSG00000198732	ENST00000381280
chr14:+:70480201-70489919	14	+	70480202	70489919	chr14:+:70480208-70489919	SMOC1	ENSG00000198732	ENST00000381280
chr14:+:74340917-74345798	14	+	74340918	74345798	chr14:+:74340917-74341286;chr14:+:74340917-74343700;chr14:+:74343871-74345798	PTGR2	ENSG00000140043	ENST00000555228
chr14:+:91681900-91691031	14	+	91681901	91691031	chr14:+:91681900-91686786;chr14:+:91681900-91690022;chr14:+:91681900-91691027	C14orf159	ENSG00000133943	ENST00000256324;ENST00000428926;ENST00000412671
chr15:-:40330595-40330688	15	-	40330596	40330688	chr15:-:40330595-40330724;chr15:-:40330595-40331076;chr15:-:40330595-40331293	SRP14	ENSG00000140319	ENST00000267884;ENST00000558527;ENST00000558720;ENST00000560773
chr15:-:40330595-40330876	15	-	40330596	40330876	chr15:-:40330595-40330724;chr15:-:40330595-40331076;chr15:-:40330595-40331293	SRP14	ENSG00000140319	ENST00000267884;ENST00000558527;ENST00000558720;ENST00000560773
chr15:-:40330595-40330930	15	-	40330596	40330930	chr15:-:40330595-40330724;chr15:-:40330595-40331076;chr15:-:40330595-40331293	SRP14	ENSG00000140319	ENST00000267884;ENST00000558527;ENST00000558720;ENST00000560773
chr15:-:40330595-40330967	15	-	40330596	40330967	chr15:-:40330595-40330724;chr15:-:40330595-40331076;chr15:-:40330595-40331293	SRP14	ENSG00000140319	ENST00000267884;ENST00000558527;ENST00000558720;ENST00000560773
chr15:-:55647958-55648509	15	-	55647959	55648509	out.of.scope	CCPG1	ENSG00000260916	ENST00000442196
chr15:-:63618545-63619347	15	-	63618546	63619347	chr15:-:63618556-63619347	CA12	ENSG00000074410	ENST00000178638;ENST00000344366
chr15:-:63618556-63631017	15	-	63618557	63631017	chr15:-:63618556-63619347;chr15:-:63619432-63631017;chr15:-:63620329-63631017	CA12	ENSG00000074410	ENST00000178638;ENST00000344366
chr15:-:63620323-63631017	15	-	63620324	63631017	chr15:-:63619432-63631017;chr15:-:63620329-63631017	CA12	ENSG00000074410	ENST00000178638;ENST00000344366
chr15:-:74043841-74043942	15	-	74043842	74043942	no.hit	C15orf59	ENSG00000205363	ENST00000569673;ENST00000559817
chr15:-:74044038-74044127	15	-	74044039	74044127	chr15:-:74044038-74044450	C15orf59	ENSG00000205363	ENST00000569673;ENST00000559817
chr15:-:75216111-75221505	15	-	75216112	75221505	chr15:-:75216111-75219106	COX5A	ENSG00000178741	ENST00000322347;ENST00000567270;ENST00000568517;ENST00000564811
chr15:-:75216111-75230255	15	-	75216112	75230255	chr15:-:75216111-75219106;chr15:-:75219228-75230255;chr15:-:75221573-75230255	COX5A	ENSG00000178741	ENST00000322347;ENST00000567270;ENST00000564811
chr15:-:83832827-83875696	15	-	83832828	83875696	chr15:-:83832827-83837973;chr15:-:83832827-83858112;chr15:-:83832827-83861003;chr15:-:83832827-83876082	HDGFRP3	ENSG00000166503	ENST00000563790
chr15:-:90015159-90015952	15	-	90015160	90015952	chr15:-:90015086-90015952	RHCG	ENSG00000140519	ENST00000560081;ENST00000268122;ENST00000558360
chr15:-:90020181-90020312	15	-	90020182	90020312	chr15:-:90020059-90020312	RHCG	ENSG00000140519	ENST00000560081;ENST00000268122;ENST00000558360
chr15:-:90020411-90021067	15	-	90020412	90021067	chr15:-:90020808-90021067;chr15:-:90020884-90021067	RHCG	ENSG00000140519	ENST00000560081;ENST00000268122;ENST00000558360
chr15:-:90021193-90022552	15	-	90021194	90022552	chr15:-:90021205-90022552	RHCG	ENSG00000140519	ENST00000560081;ENST00000268122;ENST00000558360
chr15:-:90022614-90023491	15	-	90022615	90023491	chr15:-:90022719-90023491	RHCG	ENSG00000140519	ENST00000560081;ENST00000268122
chr15:-:90026475-90030029	15	-	90026476	90030029	chr15:-:90026448-90030029;chr15:-:90029760-90030029	RHCG	ENSG00000140519	ENST00000560081;ENST00000268122
chr15:-:90627585-90628030	15	-	90627586	90628030	chr15:-:90627585-90628047;chr15:-:90627585-90628232	IDH2	ENSG00000182054	ENST00000330062;ENST00000560061;ENST00000540499
chr15:+:41191406-41192037	15	+	41191407	41192037	no.hit	VPS18	ENSG00000104142	ENST00000220509
chr15:+:43891150-43891360	15	+	43891151	43891360	chr15:+:43891150-43891354	CKMT1B	ENSG00000237289	ENST00000300283
chr15:+:44084553-44085172	15	+	44084554	44085172	chr15:+:44084581-44085172;chr15:+:44084776-44085172;chr15:+:44084809-44085172	SERF2	ENSG00000140264	ENST00000249786;ENST00000445816;ENST00000339624;ENST00000409617
chr15:+:45007839-45008512	15	+	45007840	45008512	no.hit	B2M	ENSG00000166710	ENST00000558401;ENST00000559720;ENST00000561424;ENST00000349264;ENST00000544417;ENST00000557901;ENST00000560681;ENST00000559220;ENST00000561139
chr15:+:45007889-45008526	15	+	45007890	45008526	chr15:+:45007899-45008526	B2M	ENSG00000166710	ENST00000558401;ENST00000559720;ENST00000561424;ENST00000349264;ENST00000544417;ENST00000557901;ENST00000560681;ENST00000559220;ENST00000561139
chr15:+:45007899-45009804	15	+	45007900	45009804	chr15:+:45006746-45009804;chr15:+:45007899-45008526;chr15:+:45008554-45009804	B2M	ENSG00000166710	ENST00000558401;ENST00000559720;ENST00000561424;ENST00000349264;ENST00000557901;ENST00000559220;ENST00000561139
chr15:+:45008554-45009622	15	+	45008555	45009622	chr15:+:45008554-45009804	B2M	ENSG00000166710	ENST00000558401;ENST00000559720;ENST00000561424;ENST00000349264;ENST00000557901;ENST00000559220;ENST00000561139
chr15:+:45008554-45009812	15	+	45008555	45009812	chr15:+:45008554-45009804	B2M	ENSG00000166710	ENST00000558401;ENST00000559720;ENST00000561424;ENST00000349264;ENST00000557901;ENST00000559220;ENST00000561139
chr15:+:45008744-45009804	15	+	45008745	45009804	chr15:+:45006746-45009804;chr15:+:45008554-45009804	B2M	ENSG00000166710	ENST00000558401;ENST00000559720;ENST00000561424;ENST00000349264;ENST00000557901;ENST00000559220;ENST00000561139
chr15:+:45009710-45009804	15	+	45009711	45009804	chr15:+:45006746-45009804;chr15:+:45008554-45009804	B2M	ENSG00000166710	ENST00000558401;ENST00000559720;ENST00000561424;ENST00000349264;ENST00000557901;ENST00000559220;ENST00000561139
chr15:+:57842537-57842792	15	+	57842538	57842792	no.hit	CGNL1	ENSG00000128849	ENST00000281282
chr15:+:69745359-69745672	15	+	69745360	69745672	chr15:+:69745359-69745985;chr15:+:69745359-69747508;chr15:+:69745359-69747766	RPLP1	ENSG00000137818	ENST00000260379;ENST00000357790
chr15:+:69745760-69745985	15	+	69745761	69745985	chr15:+:69745359-69745985	RPLP1	ENSG00000137818	ENST00000260379;ENST00000357790
chr15:+:89743167-89743256	15	+	89743168	89743256	no.hit	ABHD2	ENSG00000140526	ENST00000352732;ENST00000355100
chr16:-:19869867-19870026	16	-	19869868	19870026	chr16:-:19869867-19873158	GPRC5B	ENSG00000167191	ENST00000300571
chr16:-:66942392-66943242	16	-	66942393	66943242	chr16:-:66942392-66943169	CDH16	ENSG00000166589	ENST00000299752;ENST00000568632;ENST00000570262;ENST00000565796;ENST00000568698
chr16:-:66942392-66943888	16	-	66942393	66943888	chr16:-:66942392-66943169;chr16:-:66943286-66943888	CDH16	ENSG00000166589	ENST00000299752;ENST00000568632;ENST00000570262;ENST00000565796;ENST00000568698
chr16:-:735140-735256	16	-	735141	735256	chr16:-:735176-735256	WDR24	ENSG00000127580	ENST00000293883
chr16:-:74750416-74752885	16	-	74750417	74752885	chr16:-:74750497-74752885	FA2H	ENSG00000103089	ENST00000219368
chr16:-:84089721-84092906	16	-	84089722	84092906	chr16:-:84089740-84092906	MBTPS1	ENSG00000140943	ENST00000343411
chr16:+:2550973-2551710	16	+	2550974	2551710	chr16:+:2551053-2551710	TBC1D24	ENSG00000162065	ENST00000567020
chr16:+:2564938-2569218	16	+	2564939	2569218	chr16:+:2564130-2569218;chr16:+:2564183-2569218;chr16:+:2564398-2569218	ATP6V0C	ENSG00000185883	ENST00000330398;ENST00000568562
chr16:+:2565537-2569218	16	+	2565538	2569218	chr16:+:2564130-2569218;chr16:+:2564183-2569218;chr16:+:2564398-2569218	ATP6V0C	ENSG00000185883	ENST00000330398;ENST00000568562
chr16:+:2569402-2569507	16	+	2569403	2569507	chr16:+:2569402-2569541	ATP6V0C	ENSG00000185883	ENST00000330398;ENST00000568562
chr16:+:3706754-3707050	16	+	3706755	3707050	chr16:+:3706754-3706964;chr16:+:3706754-3706999;chr16:+:3706754-3707187	DNASE1	ENSG00000213918	ENST00000407479;ENST00000573804;ENST00000570807
chr16:+:624438-624527	16	+	624439	624527	no.hit	PIGQ	ENSG00000007541	ENST00000321878;ENST00000026218
chr16:+:624438-624607	16	+	624439	624607	no.hit	PIGQ	ENSG00000007541	ENST00000321878;ENST00000026218
chr16:+:67470045-67470490	16	+	67470046	67470490	chr16:+:67470045-67470151;chr16:+:67470289-67470490	HSD11B2	ENSG00000176387	ENST00000326152
chr16:+:765984-766351	16	+	765985	766351	chr16:+:765984-766932	METRN	ENSG00000103260	ENST00000570132;ENST00000219542
chr16:+:766992-767052	16	+	766993	767052	chr16:+:766992-767070	METRN	ENSG00000103260	ENST00000570132;ENST00000219542;ENST00000568415
chr16:+:85839470-85840365	16	+	85839471	85840365	chr16:+:85839470-85840061;chr16:+:85839470-85840343;chr16:+:85839470-85840432	COX4I1	ENSG00000131143	ENST00000568794;ENST00000253452;ENST00000562336
chr16:+:89627776-89628006	16	+	89627777	89628006	chr16:+:89627776-89627985	RPL13	ENSG00000167526	ENST00000484610;ENST00000563270;ENST00000567815;ENST00000562879;ENST00000565571
chr17:-:37006716-37008856	17	-	37006717	37008856	chr17:-:37004310-37008856;chr17:-:37006728-37008856	RPL23	ENSG00000125691	ENST00000394332;ENST00000245857;ENST00000577407
chr17:-:42089480-42090376	17	-	42089481	42090376	chr17:-:42089604-42090376	TMEM101	ENSG00000091947	ENST00000589334;ENST00000206380
chr17:-:4850007-4851557	17	-	4850008	4851557	chr17:-:4850115-4851557	PFN1	ENSG00000108518	ENST00000225655
chr17:-:4850111-4851557	17	-	4850112	4851557	chr17:-:4850115-4851557	PFN1	ENSG00000108518	ENST00000225655
chr17:-:6946838-6947098	17	-	6946839	6947098	chr17:-:6946838-6947093	SLC16A11	ENSG00000174326	ENST00000308009;ENST00000574600
chr17:-:80617347-80617455	17	-	80617348	80617455	chr17:-:80616010-80617455;chr17:-:80616438-80617455;chr17:-:80616589-80617455	RAB40B	ENSG00000141542	ENST00000269347;ENST00000538809
chr17:-:914103-914844	17	-	914104	914844	chr17:-:914103-914384;chr17:-:914103-915085	ABR	ENSG00000159842	ENST00000302538
chr17:+:16285296-16285725	17	+	16285297	16285725	no.hit	UBB	ENSG00000170315	ENST00000302182;ENST00000577640;ENST00000535788
chr17:+:16285461-16285638	17	+	16285462	16285638	no.hit	UBB	ENSG00000170315	ENST00000302182;ENST00000577640;ENST00000535788
chr17:+:39846193-39846342	17	+	39846194	39846342	chr17:+:39846193-39846339	EIF1	ENSG00000173812	ENST00000591776;ENST00000482111;ENST00000310837;ENST00000469308
chr17:+:46127989-46128478	17	+	46127990	46128478	chr17:+:46128143-46128478;chr17:+:46128181-46128478	NFE2L1	ENSG00000082641	ENST00000362042;ENST00000585291;ENST00000357480;ENST00000361665
chr17:+:4614184-4618307	17	+	4614185	4618307	chr17:+:4614039-4618307	ARRB2	ENSG00000141480	ENST00000572457
chr17:+:4621647-4621906	17	+	4621648	4621906	chr17:+:4621318-4621906;chr17:+:4621640-4621906	ARRB2	ENSG00000141480	ENST00000572457
chr17:+:4925813-4925911	17	+	4925814	4925911	no.hit	KIF1C	ENSG00000129250	ENST00000320785
chr17:+:72199875-72200056	17	+	72199876	72200056	chr17:+:72199849-72200056;chr17:+:72199884-72200056;chr17:+:72199909-72200056	RPL38	ENSG00000172809	ENST00000439590;ENST00000311111;ENST00000584577;ENST00000533498
chr18:-:43669628-43669844	18	-	43669629	43669844	no.hit	ATP5A1	ENSG00000152234	ENST00000282050;ENST00000590665
chr18:-:43675089-43678137	18	-	43675090	43678137	chr18:-:43675089-43684102;chr18:-:43675097-43678137;chr18:-:43675113-43678137	ATP5A1	ENSG00000152234	ENST00000282050;ENST00000590665
chr18:-:46468925-46469026	18	-	46468926	46469026	chr18:-:46468925-46469024	SMAD7	ENSG00000101665	ENST00000545051
chr18:-:47015920-47016897	18	-	47015921	47016897	chr18:-:47015920-47016823	RPL17-C18orf32;RPL17	ENSG00000215472;ENSG00000265681	ENST00000584895;ENST00000579408;ENST00000579248;ENST00000580261;ENST00000578532
chr18:-:47017297-47017886	18	-	47017298	47017886	chr18:-:47017297-47017721;chr18:-:47017297-47017774;chr18:-:47017297-47017901	RPL17-C18orf32;RPL17	ENSG00000215472;ENSG00000265681	ENST00000584895;ENST00000579408;ENST00000579248;ENST00000580261;ENST00000578532
chr18:-:47389697-47398536	18	-	47389698	47398536	chr18:-:47389697-47390510;chr18:-:47390750-47398536	MYO5B	ENSG00000167306	ENST00000285039;ENST00000324581
chr18:+:11996125-11999052	18	+	11996126	11999052	chr18:+:11981764-11999052	IMPA2	ENSG00000141401	ENST00000269159;ENST00000588927
chr18:+:29100847-29101068	18	+	29100848	29101068	no.hit	DSG2	ENSG00000046604	ENST00000261590
chr18:+:56813824-56816744	18	+	56813825	56816744	chr18:+:56807267-56816744	SEC11C	ENSG00000166562	ENST00000587834;ENST00000299714;ENST00000588875
chr19:-:16630163-16630441	19	-	16630164	16630441	chr19:-:16630163-16630431	CHERP	ENSG00000085872	ENST00000546361
chr19:-:3054262-3055661	19	-	3054263	3055661	chr19:-:3054192-3055661	AES	ENSG00000104964	ENST00000221561;ENST00000327141;ENST00000587393;ENST00000592330
chr19:-:3055932-3056309	19	-	3055933	3056309	chr19:-:3053456-3056309;chr19:-:3055724-3056309	AES	ENSG00000104964	ENST00000221561;ENST00000327141;ENST00000587393;ENST00000592330
chr19:-:3976769-3977212	19	-	3976770	3977212	chr19:-:3976745-3977212	EEF2	ENSG00000167658	ENST00000309311
chr19:-:39924185-39924304	19	-	39924186	39924304	chr19:-:39924209-39924304	RPS16	ENSG00000105193	ENST00000251453;ENST00000601655
chr19:-:51302105-51302550	19	-	51302106	51302550	chr19:-:51302181-51302550;chr19:-:51302215-51302550	C19orf48	ENSG00000167747	ENST00000345523;ENST00000391812
chr19:-:51322501-51323154	19	-	51322502	51323154	chr19:-:51322605-51323154	KLK1	ENSG00000167748	ENST00000593859;ENST00000301420
chr19:-:51322605-51323174	19	-	51322606	51323174	chr19:-:51322605-51323154	KLK1	ENSG00000167748	ENST00000593859;ENST00000301420;ENST00000596300
chr19:-:51323268-51323409	19	-	51323269	51323409	chr19:-:51323291-51323409	KLK1	ENSG00000167748	ENST00000593859;ENST00000301420;ENST00000596300
chr19:-:51323279-51323409	19	-	51323280	51323409	chr19:-:51323291-51323409	KLK1	ENSG00000167748	ENST00000593859;ENST00000301420;ENST00000596300
chr19:-:51323699-51324401	19	-	51323700	51324401	chr19:-:51323699-51324967	KLK1	ENSG00000167748	ENST00000593859;ENST00000301420
chr19:-:51323699-51326958	19	-	51323700	51326958	chr19:-:51323699-51324967;chr19:-:51325127-51326958;chr19:-:51326208-51326958	KLK1	ENSG00000167748	ENST00000593859;ENST00000301420
chr19:-:51331068-51340370	19	-	51331069	51340370	chr19:-:51331068-51334705;chr19:-:51331068-51336354;chr19:-:51334779-51340370	KLK15	ENSG00000174562	ENST00000326856
chr19:-:51412670-51412738	19	-	51412671	51412738	chr19:-:51412670-51413933	KLK4	ENSG00000167749	ENST00000324041
chr19:-:6441705-6441989	19	-	6441706	6441989	chr19:-:6441495-6441989	SLC25A23	ENSG00000125648	ENST00000301454
chr19:+:1104126-1105128	19	+	1104127	1105128	chr19:+:1104126-1105184	GPX4	ENSG00000167468	ENST00000588919
chr19:+:16772141-16790794	19	+	16772142	16790794	chr19:+:16772152-16790794	TMEM38A	ENSG00000072954	ENST00000187762;ENST00000595452
chr19:+:17970783-17972902	19	+	17970784	17972902	chr19:+:17970783-17972101;chr19:+:17972281-17972902	RPL18A	ENSG00000105640	ENST00000222247
chr19:+:2269883-2271383	19	+	2269884	2271383	chr19:+:2269743-2271383;chr19:+:2270675-2271383	OAZ1	ENSG00000104904	ENST00000592787;ENST00000602676
chr19:+:2271075-2271383	19	+	2271076	2271383	chr19:+:2269743-2271383;chr19:+:2270675-2271383	OAZ1	ENSG00000104904	ENST00000592787;ENST00000602676
chr19:+:3122546-3122639	19	+	3122547	3122639	no.hit	GNA11	ENSG00000088256	ENST00000078429
chr19:+:36139305-36145472	19	+	36139306	36145472	chr19:+:36139305-36142134;chr19:+:36142251-36145472	COX6B1	ENSG00000126267	ENST00000246554
chr19:+:42364671-42364844	19	+	42364672	42364844	chr19:+:42364359-42364844;chr19:+:42364515-42364844;chr19:+:42364564-42364844	RPS19	ENSG00000105372	ENST00000598742;ENST00000601492;ENST00000221975;ENST00000593863
chr19:+:42365281-42373109	19	+	42365282	42373109	chr19:+:42365281-42365548;chr19:+:42365281-42367940;chr19:+:42365281-42373100	RPS19	ENSG00000105372	ENST00000598742;ENST00000601492;ENST00000221975;ENST00000593863
chr19:+:45322930-45323961	19	+	45322931	45323961	chr19:+:45322983-45323961	BCAM	ENSG00000187244	ENST00000270233
chr19:+:48284645-48287551	19	+	48284646	48287551	chr19:+:48284645-48287546;chr19:+:48284645-48287662	SEPW1	ENSG00000178980	ENST00000601048;ENST00000601419;ENST00000601937
chr19:+:49993554-49993736	19	+	49993555	49993736	chr19:+:49993554-49993731	RPL13A	ENSG00000142541	ENST00000391857;ENST00000472481;ENST00000477613;ENST00000467825
chr19:+:49994121-49994276	19	+	49994122	49994276	chr19:+:49994121-49994296	RPL13A	ENSG00000142541	ENST00000391857;ENST00000472481;ENST00000477613;ENST00000467825
chr19:+:49994804-49995000	19	+	49994805	49995000	chr19:+:49994804-49994985	RPL13A	ENSG00000142541	ENST00000391857;ENST00000477613;ENST00000467825
chr19:+:49999728-49999892	19	+	49999729	49999892	chr19:+:49999728-50000429;chr19:+:49999728-50000450	RPS11	ENSG00000142534	ENST00000270625
chr19:+:49999728-50000776	19	+	49999729	50000776	chr19:+:49999728-50000429;chr19:+:49999728-50000450;chr19:+:50000582-50000776	RPS11	ENSG00000142534	ENST00000270625
chr19:+:50000011-50000450	19	+	50000012	50000450	chr19:+:49999728-50000450;chr19:+:49999754-50000450	RPS11	ENSG00000142534	ENST00000270625
chr19:+:50000539-50000776	19	+	50000540	50000776	chr19:+:50000539-50000837;chr19:+:50000582-50000776	RPS11	ENSG00000142534	ENST00000270625
chr19:+:50000819-50002768	19	+	50000820	50002768	chr19:+:50001303-50002768	RPS11	ENSG00000142534	ENST00000270625
chr19:+:54710330-54710479	19	+	54710331	54710479	chr19:+:54710330-54710420;chr19:+:54710330-54711265	RPS9	ENSG00000170889	ENST00000436445;ENST00000391751;ENST00000391753
chr19:+:54710330-54711278	19	+	54710331	54711278	chr19:+:54710330-54710420;chr19:+:54710330-54711265	RPS9	ENSG00000170889	ENST00000436445;ENST00000391751;ENST00000391753
chr19:+:55898061-55899302	19	+	55898062	55899302	chr19:+:55898061-55898134;chr19:+:55898061-55898652;chr19:+:55898061-55899297	RPL28	ENSG00000108107	ENST00000558815;ENST00000559463;ENST00000558131
chr19:+:5690345-5690516	19	+	5690346	5690516	chr19:+:5690338-5690516;chr19:+:5690400-5690516	RPL36	ENSG00000130255	ENST00000579649;ENST00000347512;ENST00000579446;ENST00000394580
chr19:+:580782-581362	19	+	580783	581362	chr19:+:580782-581314	BSG	ENSG00000172270	ENST00000333511;ENST00000353555
chr19:+:581415-581524	19	+	581416	581524	no.hit	BSG	ENSG00000172270	ENST00000333511;ENST00000353555
chr19:+:582330-582517	19	+	582331	582517	chr19:+:582330-582513	BSG	ENSG00000172270	ENST00000333511;ENST00000353555
chr19:+:7895267-7911467	19	+	7895268	7911467	chr19:+:7895267-7911381	EVI5L	ENSG00000142459	ENST00000270530
chr19:+:8322869-8326662	19	+	8322870	8326662	chr19:+:8322869-8326571	CERS4	ENSG00000090661	ENST00000251363;ENST00000559450
chr19:+:8386453-8386836	19	+	8386454	8386836	chr19:+:8386453-8386539;chr19:+:8386587-8386836	RPS28	ENSG00000233927	ENST00000600659
chr19:+:8386458-8386539	19	+	8386459	8386539	chr19:+:8386453-8386539	RPS28	ENSG00000233927	ENST00000600659
chr19:+:8386979-8387155	19	+	8386980	8387155	chr19:+:8386975-8387155	RPS28	ENSG00000233927	ENST00000600659;ENST00000417088
chr2:-:191110938-191111300	2	-	191110939	191111300	chr2:-:191110938-191114365	HIBCH	ENSG00000198130	ENST00000359678
chr2:-:211085526-211089122	2	-	211085527	211089122	chr2:-:211085526-211089038;chr2:-:211085526-211089910	ACADL	ENSG00000115361	ENST00000233710
chr2:-:217539369-217541482	2	-	217539370	217541482	no.hit	IGFBP5	ENSG00000115461	ENST00000233813
chr2:+:189157839-189248518	2	+	189157840	189248518	chr2:+:189157839-189248489	GULP1	ENSG00000144366	ENST00000359135
chr2:+:189348219-189387498	2	+	189348220	189387498	chr2:+:189348219-189356162;chr2:+:189348219-189387482;chr2:+:189348219-189433965	GULP1	ENSG00000144366	ENST00000359135
chr2:+:220047309-220048001	2	+	220047310	220048001	no.hit	FAM134A	ENSG00000144567	ENST00000273048;ENST00000420189
chr2:+:235949681-235950005	2	+	235949682	235950005	no.hit	SH3BP4	ENSG00000130147	ENST00000392011
chr2:+:242512430-242512591	2	+	242512431	242512591	no.hit	BOK	ENSG00000176720	ENST00000318407
chr2:+:242512430-242512671	2	+	242512431	242512671	no.hit	BOK	ENSG00000176720	ENST00000318407
chr2:+:242512430-242512711	2	+	242512431	242512711	no.hit	BOK	ENSG00000176720	ENST00000318407
chr2:+:26502183-26502873	2	+	26502184	26502873	chr2:+:26502183-26502861	HADHB	ENSG00000138029	ENST00000317799;ENST00000545822
chr2:+:27248900-27249151	2	+	27248901	27249151	chr2:+:27248900-27249147	MAPRE3	ENSG00000084764	ENST00000233121;ENST00000405074
chr20:-:17639679-17639979	20	-	17639680	17639979	no.hit	RRBP1	ENSG00000125844	ENST00000377813;ENST00000246043;ENST00000455029
chr20:-:23614632-23615890	20	-	23614633	23615890	chr20:-:23614636-23615890	CST3	ENSG00000101439	ENST00000376925;ENST00000398409
chr20:-:30450480-30451709	20	-	30450481	30451709	chr20:-:30450545-30451709	DUSP15	ENSG00000149599	ENST00000486996;ENST00000398084;ENST00000339738;ENST00000459848
chr20:-:30450507-30451709	20	-	30450508	30451709	chr20:-:30450545-30451709	DUSP15	ENSG00000149599	ENST00000486996;ENST00000398084;ENST00000339738;ENST00000459848
chr20:-:43961709-43964412	20	-	43961710	43964412	chr20:-:43961709-43964421;chr20:-:43961709-43976964	SDC4	ENSG00000124145	ENST00000372733
chr20:+:1099292-1099395	20	+	1099293	1099395	chr20:+:1094052-1099395	PSMF1	ENSG00000125818	ENST00000333082;ENST00000479715;ENST00000246015;ENST00000478004
chr20:+:33839824-33842435	20	+	33839825	33842435	chr20:+:33839824-33842252	MMP24	ENSG00000125966	ENST00000246186
chr20:+:44098837-44099028	20	+	44098838	44099028	chr20:+:44098500-44099028	WFDC2	ENSG00000101443	ENST00000372676
chr20:+:44099921-44100126	20	+	44099922	44100126	chr20:+:44099921-44108581	WFDC2	ENSG00000101443	ENST00000372676
chr20:+:57484634-57485005	20	+	57484635	57485005	chr20:+:57484634-57484738;chr20:+:57484859-57485005	GNAS	ENSG00000087460	ENST00000488546;ENST00000477931;ENST00000480975;ENST00000371095;ENST00000371085;ENST00000354359;ENST00000265620
chr21:-:27354790-27367062	21	-	27354791	27367062	chr21:-:27354790-27369674;chr21:-:27354790-27372329;chr21:-:27354790-27394155	APP	ENSG00000142192	ENST00000346798;ENST00000348990;ENST00000357903;ENST00000439274
chr21:-:35284691-35286753	21	-	35284692	35286753	chr21:-:35284703-35286753	ATP5O	ENSG00000241837	ENST00000431254;ENST00000290299
chr21:-:35791928-35793295	21	-	35791929	35793295	chr21:-:35791928-35796130	AP000322.53	ENSG00000243627	ENST00000450895
chr21:-:35791928-35794605	21	-	35791929	35794605	chr21:-:35791928-35796130	AP000322.53	ENSG00000243627	ENST00000450895
chr21:-:35794102-35794605	21	-	35794103	35794605	no.hit	AP000322.53	ENSG00000243627	ENST00000450895
chr21:-:38438012-38441851	21	-	38438013	38441851	chr21:-:38438012-38439561;chr21:-:38439680-38441851	PIGP	ENSG00000185808	ENST00000399103
chr21:+:42609159-42609439	21	+	42609160	42609439	chr21:+:42598281-42609439;chr21:+:42602150-42609439;chr21:+:42608591-42609439	BACE2	ENSG00000182240	ENST00000347667;ENST00000487994;ENST00000466122
chr21:+:42609656-42613820	21	+	42609657	42613820	chr21:+:42609656-42613745	BACE2	ENSG00000182240	ENST00000347667;ENST00000487994;ENST00000466122
chr21:+:44317157-44323595	21	+	44317158	44323595	chr21:+:44317157-44323291;chr21:+:44317157-44328973	NDUFV3	ENSG00000160194	ENST00000354250
chr22:-:37211279-37212017	22	-	37211280	37212017	chr22:-:37211279-37211408;chr22:-:37211279-37212988	PVALB	ENSG00000100362	ENST00000417718;ENST00000406910
chr22:-:39709315-39709629	22	-	39709316	39709629	chr22:-:39709315-39709638	RPL3	ENSG00000100316	ENST00000401609;ENST00000216146
chr22:-:41226954-41228572	22	-	41226955	41228572	chr22:-:41226960-41228572;chr22:-:41228220-41228572	ST13	ENSG00000100380	ENST00000216218;ENST00000455824
chr22:+:19941472-19948721	22	+	19941473	19948721	chr22:+:19929420-19948721;chr22:+:19938575-19948721;chr22:+:19939177-19948721	COMT	ENSG00000093010	ENST00000467943
chr22:+:44422256-44435715	22	+	44422257	44435715	chr22:+:44427387-44435715	PARVB	ENSG00000188677	ENST00000402876
chr22:+:44564604-44564758	22	+	44564605	44564758	no.hit	PARVB	ENSG00000188677	ENST00000404989
chr3:-:101404772-101405077	3	-	101404773	101405077	chr3:-:101404772-101405325	RPL24	ENSG00000114391	ENST00000394077;ENST00000495401
chr3:-:128202845-128204569	3	-	128202846	128204569	chr3:-:128202848-128204569	GATA2	ENSG00000179348	ENST00000341105
chr3:-:12881741-12882268	3	-	12881742	12882268	chr3:-:12881741-12882133;chr3:-:12881741-12882992	RPL32	ENSG00000144713	ENST00000273223;ENST00000435983;ENST00000457131;ENST00000452606
chr3:-:33055413-33055547	3	-	33055414	33055547	chr3:-:33038836-33055547	GLB1	ENSG00000170266	ENST00000307363;ENST00000399402
chr3:-:43408466-43532175	3	-	43408467	43532175	chr3:-:43408466-43414219;chr3:-:43408466-43474102	ANO10	ENSG00000160746	ENST00000350459
chr3:-:49413024-49448755	3	-	49413025	49448755	chr3:-:49413024-49444144;chr3:-:49413024-49449252	RHOA	ENSG00000067560	ENST00000418115;ENST00000454011
chr3:-:52028142-52029101	3	-	52028143	52029101	chr3:-:52028142-52028788;chr3:-:52028142-52029057	RPL29	ENSG00000162244	ENST00000294189;ENST00000475248
chr3:+:195447954-195453198	3	+	195447955	195453198	chr3:+:195447954-195449371;chr3:+:195447954-195451495;chr3:+:195447954-195451550	MUC20	ENSG00000176945	ENST00000447234;ENST00000320736
chr3:+:195456610-195456838	3	+	195456611	195456838	chr3:+:195456610-195460020;chr3:+:195456610-195461626	MUC20	ENSG00000176945	ENST00000447234;ENST00000320736;ENST00000498018
chr3:+:23958664-23959421	3	+	23958665	23959421	chr3:+:23958664-23959023;chr3:+:23958664-23959340	RPL15	ENSG00000174748	ENST00000307839;ENST00000413699;ENST00000412097;ENST00000435882
chr3:+:38012990-38017206	3	+	38012991	38017206	chr3:+:38012990-38017199	CTDSPL	ENSG00000144677	ENST00000273179
chr3:+:39449277-39452244	3	+	39449278	39452244	chr3:+:39449277-39450096;chr3:+:39450215-39452244;chr3:+:39450230-39452244	RPSA	ENSG00000168028	ENST00000301821;ENST00000458478;ENST00000443003
chr3:+:39449277-39452443	3	+	39449278	39452443	chr3:+:39449277-39450096	RPSA	ENSG00000168028	ENST00000301821;ENST00000458478;ENST00000443003
chr3:+:39449312-39450096	3	+	39449313	39450096	chr3:+:39449277-39450096	RPSA	ENSG00000168028	ENST00000301821;ENST00000458478;ENST00000443003
chr3:+:39452490-39453255	3	+	39452491	39453255	chr3:+:39452490-39453139	RPSA	ENSG00000168028	ENST00000301821;ENST00000458478;ENST00000443003
chr3:+:39452490-39453386	3	+	39452491	39453386	chr3:+:39452490-39453139;chr3:+:39453268-39453386	RPSA	ENSG00000168028	ENST00000301821;ENST00000458478;ENST00000443003
chr3:+:39453510-39453806	3	+	39453511	39453806	no.hit	RPSA	ENSG00000168028	ENST00000301821;ENST00000443003
chr3:+:42230616-42233054	3	+	42230617	42233054	chr3:+:42230616-42233049	TRAK1	ENSG00000182606	ENST00000487159;ENST00000341421
chr3:+:48482038-48485261	3	+	48482039	48485261	chr3:+:48482038-48485255	TMA7	ENSG00000232112	ENST00000438607
chr3:+:53202827-53212419	3	+	53202828	53212419	chr3:+:53195444-53212419;chr3:+:53199231-53212419;chr3:+:53207624-53212419	PRKCD	ENSG00000163932	ENST00000394729;ENST00000330452
chr3:+:69145223-69150989	3	+	69145224	69150989	chr3:+:69134374-69150989;chr3:+:69139111-69150989;chr3:+:69149220-69150989	ARL6IP5	ENSG00000144746	ENST00000273258
chr4:-:159092751-159093486	4	-	159092752	159093486	chr4:-:159092751-159093490;chr4:-:159092751-159094019	FAM198B	ENSG00000164125	ENST00000585682
chr4:-:23815845-23816110	4	-	23815846	23816110	no.hit	PPARGC1A	ENSG00000109819	ENST00000264867
chr4:-:57897502-57899360	4	-	57897503	57899360	chr4:-:57897502-57898591;chr4:-:57898718-57899360	IGFBP7	ENSG00000163453	ENST00000295666
chr4:-:57899477-57976067	4	-	57899478	57976067	chr4:-:57899477-57906989	IGFBP7	ENSG00000163453	ENST00000295666
chr4:-:77969807-77976302	4	-	77969808	77976302	chr4:-:77969815-77976302	CCNI	ENSG00000118816	ENST00000237654;ENST00000515468
chr4:-:88400728-88401523	4	-	88400729	88401523	chr4:-:88400730-88401523	SPARCL1	ENSG00000152583	ENST00000282470;ENST00000503414
chr4:-:88401672-88403560	4	-	88401673	88403560	chr4:-:88401672-88403575	SPARCL1	ENSG00000152583	ENST00000282470;ENST00000503414
chr4:-:88403685-88411424	4	-	88403686	88411424	chr4:-:88403712-88411424	SPARCL1	ENSG00000152583	ENST00000282470;ENST00000503414
chr4:+:109542297-109543106	4	+	109542298	109543106	chr4:+:109541756-109543106;chr4:+:109541868-109543106;chr4:+:109542852-109543106	RPL34	ENSG00000109475	ENST00000394667;ENST00000394665
chr4:+:152024231-152025623	4	+	152024232	152025623	chr4:+:152024231-152025328;chr4:+:152024231-152025336;chr4:+:152025438-152025623	RPS3A	ENSG00000145425	ENST00000274065;ENST00000509736
chr4:+:153712027-153750776	4	+	153712028	153750776	chr4:+:153701243-153750776;chr4:+:153701378-153750776	ARFIP1	ENSG00000164144	ENST00000353617
chr4:+:186065980-186066219	4	+	186065981	186066219	no.hit	SLC25A4	ENSG00000151729	ENST00000281456;ENST00000491736
chr4:+:41648910-41652413	4	+	41648911	41652413	chr4:+:41648910-41652409	LIMCH1	ENSG00000064042	ENST00000381753
chr4:+:41678479-41684349	4	+	41678480	41684349	chr4:+:41678479-41682022;chr4:+:41683076-41684349	LIMCH1	ENSG00000064042	ENST00000381753
chr4:+:48994107-48995002	4	+	48994108	48995002	chr4:+:48994107-48996635	CWH43	ENSG00000109182	ENST00000226432
chr4:+:68428713-68436801	4	+	68428714	68436801	chr4:+:68424647-68436801	STAP1	ENSG00000035720	ENST00000265404
chr4:+:68456671-68457857	4	+	68456672	68457857	chr4:+:68456671-68458977	STAP1	ENSG00000035720	ENST00000265404
chr4:+:7006651-7008373	4	+	7006652	7008373	chr4:+:7006651-7008358	TBC1D14	ENSG00000132405	ENST00000409757;ENST00000410031;ENST00000446947
chr4:+:96025718-96035875	4	+	96025719	96035875	chr4:+:96025718-96035870	BMPR1B	ENSG00000138696	ENST00000440890
chr5:-:130498369-130499997	5	-	130498370	130499997	chr5:-:130498369-130500752;chr5:-:130498369-130500787	HINT1	ENSG00000169567	ENST00000304043;ENST00000513345
chr5:-:137895774-137897268	5	-	137895775	137897268	chr5:-:137895780-137897268;chr5:-:137896620-137897268	HSPA9	ENSG00000113013	ENST00000297185
chr5:-:147206929-147207584	5	-	147206930	147207584	chr5:-:147204269-147207584	SPINK1	ENSG00000164266	ENST00000296695
chr5:-:149781813-149782053	5	-	149781814	149782053	chr5:-:149781813-149782125	CD74	ENSG00000019582	ENST00000377795;ENST00000353334;ENST00000518797;ENST00000009530
chr5:-:149782814-149784242	5	-	149782815	149784242	chr5:-:149782188-149784242;chr5:-:149782875-149784242	CD74	ENSG00000019582	ENST00000377795;ENST00000353334;ENST00000518797;ENST00000009530
chr5:-:16505632-16508686	5	-	16505633	16508686	chr5:-:16483581-16508686	FAM134B	ENSG00000154153	ENST00000399793;ENST00000306320
chr5:-:179226292-179226505	5	-	179226293	179226505	chr5:-:179226175-179226505;chr5:-:179226307-179226505;chr5:-:179226310-179226505	MGAT4B	ENSG00000161013	ENST00000518778;ENST00000292591;ENST00000522293;ENST00000518980;ENST00000518867
chr5:-:180665184-180666066	5	-	180665185	180666066	chr5:-:180664042-180666066;chr5:-:180665239-180666066	GNB2L1	ENSG00000204628	ENST00000511473;ENST00000504325;ENST00000376817
chr5:-:40834367-40834574	5	-	40834368	40834574	chr5:-:40834367-40834572	RPL37	ENSG00000145592	ENST00000509877;ENST00000507642;ENST00000504562;ENST00000508493
chr5:-:41749709-41760159	5	-	41749710	41760159	chr5:-:41749709-41762212	OXCT1	ENSG00000083720	ENST00000196371;ENST00000512084;ENST00000508557
chr5:-:41749709-41794104	5	-	41749710	41794104	chr5:-:41749709-41762212;chr5:-:41762302-41794104	OXCT1	ENSG00000083720	ENST00000196371;ENST00000512084;ENST00000508557
chr5:-:41762302-41793425	5	-	41762303	41793425	chr5:-:41762302-41794104;chr5:-:41762302-41840552	OXCT1	ENSG00000083720	ENST00000196371;ENST00000512084;ENST00000508557
chr5:-:42801433-42803937	5	-	42801434	42803937	chr5:-:42801433-42804757;chr5:-:42801433-42806997;chr5:-:42801433-42808252	SEPP1	ENSG00000250722	ENST00000514985;ENST00000507920;ENST00000513303
chr5:-:60083258-60139248	5	-	60083259	60139248	chr5:-:60083258-60095006;chr5:-:60083258-60139986;chr5:-:60098492-60139248	ELOVL7	ENSG00000164181	ENST00000425382
chr5:-:81572337-81573513	5	-	81572338	81573513	chr5:-:81572337-81573511	RPS23	ENSG00000186468	ENST00000296674;ENST00000512493;ENST00000504293
chr5:-:81573666-81574138	5	-	81573667	81574138	chr5:-:81573671-81574138	RPS23	ENSG00000186468	ENST00000296674;ENST00000512493
chr5:+:109049475-109051860	5	+	109049476	109051860	chr5:+:109049475-109051820	MAN2A1	ENSG00000112893	ENST00000261483
chr5:+:109125228-109139854	5	+	109125229	109139854	chr5:+:109125228-109152973	MAN2A1	ENSG00000112893	ENST00000261483
chr5:+:139556719-139574030	5	+	139556720	139574030	chr5:+:139554870-139574030	CYSTM1	ENSG00000120306	ENST00000261811;ENST00000504227
chr5:+:150406578-150407006	5	+	150406579	150407006	chr5:+:150406578-150406992;chr5:+:150406578-150407469	GPX3	ENSG00000211445	ENST00000388825
chr5:+:43700339-43702773	5	+	43700340	43702773	chr5:+:43700339-43702722	NNT	ENSG00000112992	ENST00000264663;ENST00000344920;ENST00000512996;ENST00000503059
chr5:+:80547103-80548518	5	+	80547104	80548518	chr5:+:80547103-80547714;chr5:+:80547103-80548513	CKMT2	ENSG00000131730	ENST00000254035;ENST00000437669
chr5:+:85913808-85915169	5	+	85913809	85915169	chr5:+:85913870-85915169;chr5:+:85913947-85915169;chr5:+:85914147-85915169	COX7C	ENSG00000127184	ENST00000247655;ENST00000511472;ENST00000515763
chr5:+:85914242-85915169	5	+	85914243	85915169	chr5:+:85913870-85915169;chr5:+:85913947-85915169;chr5:+:85914147-85915169	COX7C	ENSG00000127184	ENST00000247655;ENST00000511472;ENST00000515763
chr5:+:85914289-85915169	5	+	85914290	85915169	chr5:+:85913870-85915169;chr5:+:85913947-85915169;chr5:+:85914147-85915169	COX7C	ENSG00000127184	ENST00000247655;ENST00000511472;ENST00000515763
chr5:+:85915316-85916484	5	+	85915317	85916484	chr5:+:85915259-85916484;chr5:+:85915313-85916484;chr5:+:85915695-85916484	COX7C	ENSG00000127184	ENST00000247655;ENST00000511472;ENST00000515763
chr6:-:31322102-31322255	6	-	31322103	31322255	chr6:-:31322073-31322255	HLA-B	ENSG00000234745	ENST00000412585
chr6:-:31322303-31322883	6	-	31322304	31322883	chr6:-:31322303-31322409;chr6:-:31322442-31322883	HLA-B	ENSG00000234745	ENST00000412585
chr6:-:32812257-32812375	6	-	32812258	32812375	no.hit	PSMB8	ENSG00000204264	ENST00000374881
chr6:-:46216633-46420854	6	-	46216634	46420854	chr6:-:46216633-46293129;chr6:-:46216633-46424488	RCAN2	ENSG00000172348	ENST00000371374;ENST00000306764
chr6:-:46424715-46456738	6	-	46424716	46456738	chr6:-:46424715-46458909;chr6:-:46424715-46459606	RCAN2	ENSG00000172348	ENST00000371374;ENST00000306764
chr6:-:74227628-74227752	6	-	74227629	74227752	chr6:-:74227657-74227752	EEF1A1	ENSG00000156508	ENST00000309268;ENST00000490569;ENST00000331523
chr6:-:74228258-74228420	6	-	74228259	74228420	chr6:-:74228333-74228420	EEF1A1	ENSG00000156508	ENST00000309268;ENST00000490569;ENST00000331523
chr6:-:74228951-74229605	6	-	74228952	74229605	chr6:-:74228951-74229059;chr6:-:74229239-74229605	EEF1A1	ENSG00000156508	ENST00000309268;ENST00000490569;ENST00000331523;ENST00000495333
chr6:+:29911320-29912276	6	+	29911321	29912276	chr6:+:29911320-29911898;chr6:+:29912174-29912276	HLA-A	ENSG00000206503	ENST00000376809
chr6:+:29912144-29912276	6	+	29912145	29912276	chr6:+:29912174-29912276	HLA-A	ENSG00000206503	ENST00000376809
chr6:+:30459430-30460317	6	+	30459431	30460317	chr6:+:30459430-30460180;chr6:+:30460213-30460317	HLA-E	ENSG00000204592	ENST00000376630
chr6:+:33243660-33243717	6	+	33243661	33243717	chr6:+:33243660-33243741	RPS18	ENSG00000231500	ENST00000439602;ENST00000474626
chr6:+:36107382-36107473	6	+	36107383	36107473	no.hit	MAPK13	ENSG00000156711	ENST00000211287
chr7:-:10973309-10977716	7	-	10973310	10977716	chr7:-:10973319-10977716	NDUFA4	ENSG00000189043	ENST00000339600
chr7:-:10977765-10978434	7	-	10977766	10978434	chr7:-:10977774-10978434	NDUFA4	ENSG00000189043	ENST00000339600;ENST00000486007
chr7:-:10977797-10978434	7	-	10977798	10978434	chr7:-:10977774-10978434	NDUFA4	ENSG00000189043	ENST00000339600;ENST00000486007
chr7:-:138447179-138447641	7	-	138447180	138447641	chr7:-:138447179-138447644	ATP6V0A4	ENSG00000105929	ENST00000310018;ENST00000393054
chr7:-:140154208-140154261	7	-	140154209	140154261	no.hit	MKRN1	ENSG00000133606	ENST00000255977
chr7:-:150036168-150037188	7	-	150036169	150037188	chr7:-:150036170-150037188	RARRES2	ENSG00000106538	ENST00000223271
chr7:-:17841282-17854456	7	-	17841283	17854456	chr7:-:17841282-17843041;chr7:-:17843203-17854456	SNX13	ENSG00000071189	ENST00000428135
chr7:-:22861974-22862295	7	-	22861975	22862295	chr7:-:22852804-22862295;chr7:-:22857667-22862295	TOMM7	ENSG00000196683	ENST00000358435
chr7:-:72717911-72717983	7	-	72717912	72717983	no.hit	NSUN5	ENSG00000130305	ENST00000438747
chr7:-:92821676-92825086	7	-	92821677	92825086	chr7:-:92821676-92825140	HEPACAM2	ENSG00000188175	ENST00000394468
chr7:-:99056886-99063751	7	-	99056887	99063751	chr7:-:99056886-99057708;chr7:-:99056886-99063733;chr7:-:99057816-99063751;chr7:-:99057846-99063751	ATP5J2	ENSG00000241468	ENST00000449683;ENST00000292475;ENST00000488775;ENST00000394186
chr7:+:117120201-117121196	7	+	117120202	117121196	chr7:+:117120201-117144306	CFTR	ENSG00000001626	ENST00000003084
chr7:+:117227887-117242879	7	+	117227888	117242879	chr7:+:117227887-117230406;chr7:+:117235112-117242879	CFTR	ENSG00000001626	ENST00000003084
chr7:+:128503116-128503408	7	+	128503117	128503408	chr7:+:128503116-128505173;chr7:+:128503116-128505430	ATP6V1F	ENSG00000128524	ENST00000249289
chr7:+:129019590-129028911	7	+	129019591	129028911	chr7:+:129019590-129028896	AHCYL2	ENSG00000158467	ENST00000446544
chr7:+:138487838-138488750	7	+	138487839	138488750	no.hit	TMEM213	ENSG00000214128	ENST00000442682
chr7:+:140380937-140389396	7	+	140380938	140389396	chr7:+:140380937-140386789;chr7:+:140387041-140389396	ADCK2	ENSG00000133597	ENST00000072869
chr7:+:140404736-140406362	7	+	140404737	140406362	chr7:+:140404763-140406362	NDUFB2	ENSG00000090266	ENST00000247866
chr7:+:23301184-23306099	7	+	23301185	23306099	chr7:+:23300392-23306099	GPNMB	ENSG00000136235	ENST00000258733;ENST00000381990
chr7:+:23309794-23313145	7	+	23309795	23313145	chr7:+:23309794-23313139	GPNMB	ENSG00000136235	ENST00000258733;ENST00000381990
chr7:+:44839479-44840885	7	+	44839480	44840885	chr7:+:44839473-44840885;chr7:+:44840142-44840885	PPIA	ENSG00000196262	ENST00000468812;ENST00000489459;ENST00000355968
chr7:+:5330494-5330808	7	+	5330495	5330808	chr7:+:5330494-5330754	SLC29A4	ENSG00000164638	ENST00000297195
chr7:+:5339058-5340156	7	+	5339059	5340156	chr7:+:5339058-5340052	SLC29A4	ENSG00000164638	ENST00000297195
chr7:+:5340293-5342497	7	+	5340294	5342497	chr7:+:5340293-5342427;chr7:+:5340293-5342846	SLC29A4	ENSG00000164638	ENST00000297195
chr7:+:71177096-71177306	7	+	71177097	71177306	no.hit	WBSCR17	ENSG00000185274	ENST00000333538
chr7:+:71177096-71177388	7	+	71177097	71177388	no.hit	WBSCR17	ENSG00000185274	ENST00000333538
chr7:+:97913167-97920422	7	+	97913168	97920422	chr7:+:97911765-97920422;chr7:+:97912322-97920422	BRI3	ENSG00000164713	ENST00000456357;ENST00000297290
chr8:-:11704125-11704560	8	-	11704126	11704560	chr8:-:11703298-11704560	CTSB	ENSG00000164733	ENST00000353047;ENST00000453527;ENST00000533455
chr8:-:121706003-121706087	8	-	121706004	121706087	no.hit	SNTB1	ENSG00000172164	ENST00000395601
chr8:-:125603476-125666283	8	-	125603477	125666283	chr8:-:125603476-125631507;chr8:-:125603476-125685437;chr8:-:125603476-125711766	MTSS1	ENSG00000170873	ENST00000518547
chr8:-:134519564-134558016	8	-	134519565	134558016	chr8:-:134488843-134558016;chr8:-:134511432-134558016;chr8:-:134551972-134558016	ST3GAL1	ENSG00000008513	ENST00000521180
chr8:-:146015811-146016661	8	-	146015812	146016661	chr8:-:146015855-146016661;chr8:-:146016148-146016661	RPL8	ENSG00000161016	ENST00000531975;ENST00000529163;ENST00000526668;ENST00000394920;ENST00000262584;ENST00000533397;ENST00000532702
chr8:-:28967578-28970979	8	-	28967579	28970979	chr8:-:28967587-28970979	KIF13B	ENSG00000197892	ENST00000524189
chr8:-:6728348-6730680	8	-	6728349	6730680	chr8:-:6728348-6735318	DEFB1	ENSG00000164825	ENST00000297439
chr8:-:6728348-6734530	8	-	6728349	6734530	chr8:-:6728348-6735318	DEFB1	ENSG00000164825	ENST00000297439
chr8:-:6728348-6734906	8	-	6728349	6734906	chr8:-:6728348-6735318	DEFB1	ENSG00000164825	ENST00000297439
chr8:-:6730881-6734793	8	-	6730882	6734793	no.hit	DEFB1	ENSG00000164825	ENST00000297439
chr8:-:6734600-6735318	8	-	6734601	6735318	chr8:-:6728348-6735318	DEFB1	ENSG00000164825	ENST00000297439
chr8:-:71209035-71315432	8	-	71209036	71315432	chr8:-:71209035-71314048;chr8:-:71209035-71314397;chr8:-:71209035-71315934	NCOA2	ENSG00000140396	ENST00000452400
chr8:-:74204631-74204923	8	-	74204632	74204923	chr8:-:74204640-74204923	RPL7	ENSG00000147604	ENST00000352983;ENST00000396466
chr8:-:99057627-99057739	8	-	99057628	99057739	chr8:-:99057627-99057735	RPL30	ENSG00000156482	ENST00000396070;ENST00000518850;ENST00000287038
chr8:+:58982998-58988093	8	+	58982999	58988093	chr8:+:58944262-58988093;chr8:+:58955858-58988093;chr8:+:58982921-58988093;chr8:+:58982946-58988093	FAM110B	ENSG00000169122	ENST00000361488;ENST00000518427
chr8:+:86377044-86377500	8	+	86377045	86377500	chr8:+:86376344-86377500	CA2	ENSG00000104267	ENST00000285379;ENST00000520127
chr8:+:87111337-87144158	8	+	87111338	87144158	chr8:+:87111337-87125937	ATP6V0D2	ENSG00000147614	ENST00000285393
chr8:+:87118940-87125937	8	+	87118941	87125937	chr8:+:87111337-87125937	ATP6V0D2	ENSG00000147614	ENST00000285393
chr8:+:87163769-87166043	8	+	87163770	87166043	chr8:+:87163769-87165044	ATP6V0D2	ENSG00000147614	ENST00000285393
chr8:+:87165444-87166043	8	+	87165445	87166043	no.hit	ATP6V0D2	ENSG00000147614	ENST00000285393
chr8:+:92262072-92301351	8	+	92262073	92301351	chr8:+:92262072-92301363	SLC26A7	ENSG00000147606	ENST00000276609
chr9:-:119188250-119188333	9	-	119188251	119188333	no.hit	ASTN2	ENSG00000148219	ENST00000373986
chr9:-:125898794-125909133	9	-	125898795	125909133	chr9:-:125898794-125901807;chr9:-:125901966-125909133	STRBP	ENSG00000165209	ENST00000348403
chr9:-:139757451-139757793	9	-	139757452	139757793	chr9:-:139757451-139757739	EDF1	ENSG00000107223	ENST00000371649;ENST00000224073
chr9:-:19376383-19376491	9	-	19376384	19376491	chr9:-:19376386-19376491	RPS6	ENSG00000137154	ENST00000380394;ENST00000315377
chr9:-:19376587-19378390	9	-	19376588	19378390	no.hit	RPS6	ENSG00000137154	ENST00000380394;ENST00000315377
chr9:-:19378916-19379460	9	-	19378917	19379460	chr9:-:19378916-19379484	RPS6	ENSG00000137154	ENST00000380394;ENST00000315377
chr9:-:19379597-19380187	9	-	19379598	19380187	chr9:-:19379616-19380187	RPS6	ENSG00000137154	ENST00000380394;ENST00000315377
chr9:+:136217174-136217427	9	+	136217175	136217427	chr9:+:136217174-136217451	RPL7A	ENSG00000148303	ENST00000323345
chr9:+:139685876-139686081	9	+	139685877	139686081	chr9:+:139685876-139686077;chr9:+:139685876-139686162;chr9:+:139685876-139686229;chr9:+:139685876-139686398	TMEM141	ENSG00000244187	ENST00000290079;ENST00000465017;ENST00000483187
chr9:+:139687475-139687630	9	+	139687476	139687630	no.hit	TMEM141	ENSG00000244187	ENST00000290079;ENST00000465017;ENST00000483187
chr9:+:35842714-35845804	9	+	35842715	35845804	chr9:+:35842714-35845971	TMEM8B	ENSG00000137103	ENST00000377988
chr9:+:97200810-97207245	9	+	97200811	97207245	chr9:+:97200810-97203266;chr9:+:97203381-97207245	HIATL1	ENSG00000148110	ENST00000375344
chrX:-:11162365-11174648	X	-	11162366	11174648	chrX:-:11162365-11163191;chrX:-:11162368-11174648;chrX:-:11166839-11174648	ARHGAP6	ENSG00000047648	ENST00000380736
chrX:-:118923962-118925536	X	-	118923963	118925536	chrX:-:118923974-118925536	RPL39	ENSG00000198918	ENST00000361575
chrX:-:152966430-152967396	X	-	152966431	152967396	chrX:-:152966430-152967461	BCAP31	ENSG00000185825	ENST00000345046
chrX:-:152967556-152968389	X	-	152967557	152968389	chrX:-:152967562-152968389	BCAP31	ENSG00000185825	ENST00000345046
chrX:-:71493239-71493717	X	-	71493240	71493717	chrX:-:71493239-71493650	RPS4X	ENSG00000198034	ENST00000316084
chrX:-:71495024-71495393	X	-	71495025	71495393	chrX:-:71495000-71495393	RPS4X	ENSG00000198034	ENST00000316084;ENST00000373626
chrX:+:118602589-118603939	X	+	118602590	118603939	chrX:+:118602589-118603623	SLC25A5	ENSG00000005022	ENST00000317881
chrX:+:119007356-119007765	X	+	119007357	119007765	chrX:+:119007356-119010476	NDUFA1	ENSG00000125356	ENST00000371437
chrX:+:119007356-119009308	X	+	119007357	119009308	chrX:+:119007356-119010476	NDUFA1	ENSG00000125356	ENST00000371437
chrX:+:153627737-153627835	X	+	153627738	153627835	chrX:+:153627737-153627827	RPL10	ENSG00000147403	ENST00000436473;ENST00000491035;ENST00000458500;ENST00000406022
chrX:+:38660740-38661787	X	+	38660741	38661787	chrX:+:38660740-38663562;chrX:+:38660740-38663935	MID1IP1	ENSG00000165175	ENST00000378474
chrX:+:40457986-40458900	X	+	40457987	40458900	chrX:+:40457986-40458187;chrX:+:40457986-40458843	ATP6AP2	ENSG00000182220	ENST00000378438
chrX:+:69697482-69698999	X	+	69697483	69698999	chrX:+:69675113-69698999;chrX:+:69675952-69698999	DLG3	ENSG00000082458	ENST00000542398

## Sheet: KIRP
junc.id	chr	strand	int.start	int.end	canonical	symbol	ensg	enst
chr1:-:155874289-155874521	1	-	155874290	155874521	chr1:-:155874293-155874521;chr1:-:155874401-155874521	RIT1	ENSG00000143622	ENST00000368323
chr1:-:206239579-206241532	1	-	206239580	206241532	chr1:-:206239579-206240133;chr1:-:206240195-206241532	C1orf186	ENSG00000196533	ENST00000331555
chr1:-:206243598-206277156	1	-	206243599	206277156	chr1:-:206243598-206288104	C1orf186	ENSG00000196533	ENST00000331555
chr1:-:206277928-206278328	1	-	206277929	206278328	no.hit	C1orf186	ENSG00000196533	ENST00000331555
chr1:-:206277928-206279154	1	-	206277929	206279154	no.hit	C1orf186	ENSG00000196533	ENST00000331555
chr1:-:206277928-206288104	1	-	206277929	206288104	chr1:-:206243598-206288104;chr1:-:206280970-206288104;chr1:-:206285147-206288104	C1orf186	ENSG00000196533	ENST00000331555
chr1:-:206280026-206288104	1	-	206280027	206288104	chr1:-:206243598-206288104;chr1:-:206280026-206280537;chr1:-:206280026-206280921;chr1:-:206280970-206288104;chr1:-:206285147-206288104	C1orf186	ENSG00000196533	ENST00000331555
chr1:-:26308959-26310436	1	-	26308960	26310436	chr1:-:26308968-26310436	PAFAH2	ENSG00000158006	ENST00000374282
chr1:-:36897461-36898022	1	-	36897462	36898022	chr1:-:36897483-36898022	OSCP1	ENSG00000116885	ENST00000235532
chr1:-:6253108-6257711	1	-	6253109	6257711	chr1:-:6253114-6257711	RPL22	ENSG00000116251	ENST00000234875;ENST00000497965;ENST00000471204
chr1:-:8921480-8922945	1	-	8921481	8922945	chr1:-:8921488-8922945	ENO1	ENSG00000074800	ENST00000234590
chr1:+:215781487-215785166	1	+	215781488	215785166	chr1:+:215781514-215785166	KCTD3	ENSG00000136636	ENST00000259154
chr1:+:224553693-224559031	1	+	224553694	224559031	chr1:+:224553693-224558984;chr1:+:224553693-224563496;chr1:+:224553693-224566770	CNIH4	ENSG00000143771	ENST00000366856
chr1:+:22963195-22964082	1	+	22963196	22964082	chr1:+:22963195-22964102	C1QA	ENSG00000173372	ENST00000374642
chr1:+:93300470-93301757	1	+	93300471	93301757	chr1:+:93300470-93301746	RPL5	ENSG00000122406	ENST00000370321
chr1:+:93301949-93303045	1	+	93301950	93303045	chr1:+:93301949-93303012	RPL5	ENSG00000122406	ENST00000370321
chr10:-:129676684-129690819	10	-	129676685	129690819	chr10:-:129676684-129681959;chr10:-:129682139-129690819	CLRN3	ENSG00000180745	ENST00000368671
chr10:-:29760166-29762766	10	-	29760167	29762766	chr10:-:29760172-29762766;chr10:-:29762616-29762766	SVIL	ENSG00000197321	ENST00000375400
chr10:-:91222381-91295198	10	-	91222382	91295198	chr10:-:91222381-91294257;chr10:-:91294397-91295198	SLC16A12	ENSG00000152779	ENST00000371790
chr10:-:98416691-98433014	10	-	98416692	98433014	chr10:-:98416691-98429287;chr10:-:98416691-98460559;chr10:-:98416691-98469323	PIK3AP1	ENSG00000155629	ENST00000339364
chr10:+:45936878-45938572	10	+	45936879	45938572	chr10:+:45936878-45938485	ALOX5	ENSG00000012779	ENST00000374391
chr10:+:74644140-74645506	10	+	74644141	74645506	chr10:+:74644140-74645502	MCU	ENSG00000156026	ENST00000373053;ENST00000605416
chr10:+:88728362-88729962	10	+	88728363	88729962	chr10:+:88728362-88729956;chr10:+:88728362-88730232	ADIRF	ENSG00000148671	ENST00000372013;ENST00000416348;ENST00000561504
chr11:-:117690997-117691380	11	-	117690998	117691380	chr11:-:117691087-117691380;chr11:-:117691087-117691380	FXYD2	ENSG00000137731	ENST00000292079;ENST00000260287;ENST00000534383
chr11:-:117690997-117691380	11	-	117690998	117691380	chr11:-:117691087-117691380;chr11:-:117691087-117691380	FXYD2	ENSG00000137731	ENST00000292079;ENST00000260287;ENST00000534383
chr11:-:117690997-117691380	11	-	117690998	117691380	chr11:-:117691087-117691380;chr11:-:117691087-117691380	FXYD2	ENSG00000137731	ENST00000292079;ENST00000260287;ENST00000534383
chr11:-:117690997-117691380	11	-	117690998	117691380	chr11:-:117691087-117691380;chr11:-:117691087-117691380	FXYD2	ENSG00000137731	ENST00000292079;ENST00000260287;ENST00000534383
chr11:-:130750701-130764497	11	-	130750702	130764497	chr11:-:130750701-130762645;chr11:-:130750701-130763658;chr11:-:130750701-130773149	SNX19	ENSG00000120451	ENST00000265909
chr11:-:57095356-57095776	11	-	57095357	57095776	chr11:-:57095356-57095770	SSRP1	ENSG00000149136	ENST00000278412
chr11:+:126146418-126146968	11	+	126146419	126146968	chr11:+:126146418-126146892;chr11:+:126146418-126146965	FOXRED1	ENSG00000110074	ENST00000263578
chr11:+:18427119-18428720	11	+	18427120	18428720	chr11:+:18427119-18428663	LDHA	ENSG00000134333	ENST00000430553;ENST00000545215;ENST00000227157;ENST00000379412
chr11:+:61135470-61136071	11	+	61135471	61136071	chr11:+:61135470-61135723;chr11:+:61135470-61136068;chr11:+:61135470-61136243	TMEM138	ENSG00000149483	ENST00000543833
chr11:+:67351640-67351967	11	+	67351641	67351967	chr11:+:67351640-67351934	GSTP1	ENSG00000084207	ENST00000398606
chr12:-:125396954-125397129	12	-	125396955	125397129	no.hit	UBC	ENSG00000150991	ENST00000538617;ENST00000339647
chr12:-:125397182-125397357	12	-	125397183	125397357	no.hit	UBC	ENSG00000150991	ENST00000538617;ENST00000339647
chr12:-:125397410-125397813	12	-	125397411	125397813	no.hit	UBC	ENSG00000150991	ENST00000538617;ENST00000339647
chr12:-:125397530-125397833	12	-	125397531	125397833	no.hit	UBC	ENSG00000150991	ENST00000538617;ENST00000339647
chr12:-:15803935-15807078	12	-	15803936	15807078	chr12:-:15803940-15807078	EPS8	ENSG00000151491	ENST00000543468;ENST00000543523
chr12:-:15835906-15885324	12	-	15835907	15885324	chr12:-:15835906-15837102;chr12:-:15835906-15837130;chr12:-:15835906-15865786;chr12:-:15835906-15881062;chr12:-:15835906-15933512;chr12:-:15835906-15940896;chr12:-:15835906-15942094	EPS8	ENSG00000151491	ENST00000543468;ENST00000543523
chr12:-:54581686-54582734	12	-	54581687	54582734	chr12:-:54576407-54582734;chr12:-:54577743-54582734;chr12:-:54581686-54582650;chr12:-:54581689-54582734;chr12:-:54582380-54582734	SMUG1	ENSG00000123415	ENST00000337581;ENST00000243112
chr12:-:57032980-57033763	12	-	57032981	57033763	chr12:-:57032980-57038954;chr12:-:57033091-57033763	ATP5B	ENSG00000110955	ENST00000262030;ENST00000548474;ENST00000547250
chr12:-:7076906-7077054	12	-	7076907	7077054	chr12:-:7076401-7077054;chr12:-:7076942-7077054	PHB2	ENSG00000215021	ENST00000535923;ENST00000399433
chr12:+:102272649-102291640	12	+	102272650	102291640	chr12:+:102271698-102291640;chr12:+:102283999-102291640	DRAM1	ENSG00000136048	ENST00000258534
chr12:+:102308010-102314993	12	+	102308011	102314993	chr12:+:102295211-102314993;chr12:+:102308010-102313886;chr12:+:102313979-102314993	DRAM1	ENSG00000136048	ENST00000258534
chr12:+:112182847-112183993	12	+	112182848	112183993	chr12:+:112182847-112183947	ACAD10	ENSG00000111271	ENST00000313698
chr12:+:112228312-112229109	12	+	112228313	112229109	chr12:+:112228366-112229109	ALDH2	ENSG00000111275	ENST00000416293;ENST00000261733;ENST00000548536
chr12:+:124191620-124192313	12	+	124191621	124192313	chr12:+:124191620-124192150	TCTN2	ENSG00000168778	ENST00000303372
chr12:+:40657703-40668460	12	+	40657704	40668460	chr12:+:40657703-40668384	LRRK2	ENSG00000188906	ENST00000298910
chr12:+:40709102-40710079	12	+	40709103	40710079	chr12:+:40709102-40713789	LRRK2	ENSG00000188906	ENST00000298910;ENST00000430804
chr12:+:40710205-40713789	12	+	40710206	40713789	chr12:+:40709102-40713789	LRRK2	ENSG00000188906	ENST00000298910;ENST00000430804
chr12:+:40758800-40760807	12	+	40758801	40760807	chr12:+:40758852-40760807	LRRK2	ENSG00000188906	ENST00000298910;ENST00000430804
chr12:+:52638178-52639195	12	+	52638179	52639195	chr12:+:52636921-52639195	KRT7	ENSG00000135480	ENST00000331817;ENST00000552322
chr12:+:56510583-56510977	12	+	56510584	56510977	chr12:+:56510583-56510972;chr12:+:56510583-56511265	RPL41	ENSG00000229117	ENST00000546591;ENST00000501597;ENST00000546485;ENST00000358888
chr12:+:56510583-56510981	12	+	56510584	56510981	chr12:+:56510583-56510972;chr12:+:56510583-56511265	RPL41	ENSG00000229117	ENST00000546591;ENST00000501597;ENST00000546485;ENST00000358888
chr12:+:56554104-56555172	12	+	56554105	56555172	chr12:+:56554104-56554409;chr12:+:56554104-56555170	MYL6	ENSG00000092841	ENST00000550697;ENST00000348108;ENST00000547649;ENST00000548400
chr12:+:6345441-6346975	12	+	6345442	6346975	chr12:+:6345441-6346928	CD9	ENSG00000010278	ENST00000009180
chr13:-:103437466-103438581	13	-	103437467	103438581	chr13:-:103436862-103438581	KDELC1	ENSG00000134901	ENST00000376004
chr13:-:103443488-103443646	13	-	103443489	103443646	chr13:-:103443488-103443607	KDELC1	ENSG00000134901	ENST00000376004
chr13:+:103453085-103457407	13	+	103453086	103457407	chr13:+:103453085-103457656	BIVM	ENSG00000134897	ENST00000257336
chr13:+:103484047-103486818	13	+	103484048	103486818	chr13:+:103484047-103486815	BIVM	ENSG00000134897	ENST00000257336
chr13:+:113530255-113536126	13	+	113530256	113536126	chr13:+:113530255-113532530;chr13:+:113530255-113534859;chr13:+:113530255-113536129;chr13:+:113532617-113536126	ATP11A	ENSG00000068650	ENST00000375630
chr13:+:113532617-113536129	13	+	113532618	113536129	chr13:+:113530255-113536129;chr13:+:113532617-113536126;chr13:+:113532617-113536189	ATP11A	ENSG00000068650	ENST00000375630
chr13:+:80055656-80094944	13	+	80055657	80094944	chr13:+:80055659-80094944;chr13:+:80093304-80094944	NDFIP2	ENSG00000102471	ENST00000218652
chr13:+:80095110-80107463	13	+	80095111	80107463	chr13:+:80095110-80107457	NDFIP2	ENSG00000102471	ENST00000218652
chr14:-:23390138-23390253	14	-	23390139	23390253	no.hit	PRMT5	ENSG00000100462	ENST00000324366
chr14:-:50085844-50087279	14	-	50085845	50087279	chr14:-:50085858-50087279	RPL36AL	ENSG00000165502	ENST00000298289
chr14:+:21152855-21161705	14	+	21152856	21161705	chr14:+:21152855-21167513;chr14:+:21152917-21161705;chr14:+:21157033-21161705	ANG;AL163636.6	ENSG00000214274;ENSG00000259171	ENST00000336811;ENST00000553909
chr14:+:24607608-24607697	14	+	24607609	24607697	chr14:+:24607608-24607682	PSME1	ENSG00000092010	ENST00000206451
chr14:+:39735936-39746137	14	+	39735937	39746137	chr14:+:39734625-39746137;chr14:+:39735731-39746137;chr14:+:39736393-39746137;chr14:+:39736726-39746137	CTAGE5	ENSG00000150527	ENST00000341749
chr15:-:23021429-23026021	15	-	23021430	23026021	chr15:-:23021429-23027800;chr15:-:23021429-23033277;chr15:-:23021429-23033893;chr15:-:23021429-23034146	NIPA2	ENSG00000140157	ENST00000398013
chr15:-:58933159-58938253	15	-	58933160	58938253	chr15:-:58933159-58936084;chr15:-:58936177-58938253	ADAM10	ENSG00000137845	ENST00000260408;ENST00000396136
chr15:-:64448341-64448923	15	-	64448342	64448923	chr15:-:64448344-64448923	PPIB	ENSG00000166794	ENST00000300026
chr15:+:58830692-58833983	15	+	58830693	58833983	chr15:+:58724319-58833983;chr15:+:58830716-58833983	LIPC	ENSG00000166035	ENST00000433326
chr15:+:66172089-66180040	15	+	66172090	66180040	chr15:+:66172089-66180038	RAB11A	ENSG00000103769	ENST00000564910;ENST00000261890;ENST00000566233;ENST00000565075;ENST00000567671
chr16:-:2327667-2327879	16	-	2327668	2327879	chr16:-:2327671-2327879	ABCA3	ENSG00000167972	ENST00000301732
chr16:-:29884064-29884858	16	-	29884065	29884858	chr16:-:29884064-29884560;chr16:-:29884752-29884858	SEZ6L2	ENSG00000174938	ENST00000346932;ENST00000350527;ENST00000308713
chr16:-:89366153-89366288	16	-	89366154	89366288	no.hit	ANKRD11	ENSG00000167522	ENST00000567736
chr16:-:89366379-89366649	16	-	89366380	89366649	no.hit	ANKRD11	ENSG00000167522	ENST00000567736
chr16:+:2028221-2028315	16	+	2028222	2028315	chr16:+:2028221-2028313	TBL3	ENSG00000183751	ENST00000567615
chr16:+:20912211-20931443	16	+	20912212	20931443	chr16:+:20911857-20931443;chr16:+:20912211-20913807;chr16:+:20912211-20926877;chr16:+:20914039-20931443;chr16:+:20927036-20931443	LYRM1	ENSG00000102897	ENST00000439021
chr16:+:29816047-29816134	16	+	29816048	29816134	chr16:+:29815386-29816134;chr16:+:29815428-29816134	KIF22	ENSG00000079616	ENST00000160827;ENST00000568312
chr16:+:29848279-29851522	16	+	29848280	29851522	chr16:+:29848279-29851498	MVP	ENSG00000013364	ENST00000357402;ENST00000395353
chr16:+:544806-544970	16	+	544807	544970	no.hit	RAB11FIP3	ENSG00000090565	ENST00000434585;ENST00000450428
chr16:+:88925197-88926070	16	+	88925198	88926070	chr16:+:88925197-88925752;chr16:+:88925197-88925980;chr16:+:88925197-88926300;chr16:+:88925199-88926070	TRAPPC2L	ENSG00000167515	ENST00000567895;ENST00000567312;ENST00000568583
chr16:+:88926380-88927358	16	+	88926381	88927358	chr16:+:88926380-88927300;chr16:+:88926380-88927318;chr16:+:88926380-88927321	TRAPPC2L	ENSG00000167515	ENST00000567895;ENST00000567312;ENST00000568583
chr17:-:19246754-19247102	17	-	19246755	19247102	chr17:-:19246774-19247102;chr17:-:19246808-19247102;chr17:-:19246863-19247102	B9D1	ENSG00000108641	ENST00000261499
chr17:-:3566499-3566531	17	-	3566500	3566531	no.hit	TAX1BP3	ENSG00000213977	ENST00000225525
chr17:-:43190607-43190806	17	-	43190608	43190806	chr17:-:43190625-43190806	PLCD3	ENSG00000161714	ENST00000539433;ENST00000543623
chr17:-:46030629-46035219	17	-	46030630	46035219	chr17:-:46030629-46035022	PRR15L	ENSG00000167183	ENST00000300557
chr17:+:16285296-16285410	17	+	16285297	16285410	no.hit	UBB	ENSG00000170315	ENST00000302182;ENST00000577640;ENST00000535788;ENST00000578649;ENST00000395839
chr17:+:16285497-16285672	17	+	16285498	16285672	chr17:+:16284498-16285672;chr17:+:16285444-16285672	UBB	ENSG00000170315	ENST00000302182;ENST00000577640;ENST00000535788;ENST00000578649;ENST00000395839
chr17:+:260437-262935	17	+	260438	262935	chr17:+:260437-262938	C17orf97	ENSG00000187624	ENST00000360127
chr17:+:38504716-38506052	17	+	38504717	38506052	chr17:+:38504716-38506035	RARA	ENSG00000131759	ENST00000425707
chr17:+:46190761-46196065	17	+	46190762	46196065	chr17:+:46190022-46196065;chr17:+:46190763-46196065	SNX11	ENSG00000002919	ENST00000359238
chr17:+:48148829-48149434	17	+	48148830	48149434	no.hit	ITGA3	ENSG00000005884	ENST00000320031
chr17:+:72998323-72999304	17	+	72998324	72999304	chr17:+:72998323-72999277	CDR2L	ENSG00000109089	ENST00000337231
chr19:-:11687403-11687608	19	-	11687404	11687608	chr19:-:11687403-11687530	ACP5	ENSG00000102575	ENST00000433365
chr19:-:11687655-11687871	19	-	11687656	11687871	chr19:-:11687658-11687871	ACP5	ENSG00000102575	ENST00000433365
chr19:-:3978005-3979326	19	-	3978006	3979326	chr19:-:3978170-3979326	EEF2	ENSG00000167658	ENST00000309311
chr19:-:44050255-44050746	19	-	44050256	44050746	chr19:-:44050258-44050746	XRCC1	ENSG00000073050	ENST00000543982
chr19:-:44057054-44057133	19	-	44057055	44057133	chr19:-:44057060-44057133	XRCC1	ENSG00000073050	ENST00000543982
chr19:-:46318952-46319108	19	-	46318953	46319108	chr19:-:46318955-46319108	SYMPK	ENSG00000125755	ENST00000598155;ENST00000245934
chr19:-:49118676-49119183	19	-	49118677	49119183	no.hit	RPL18	ENSG00000063177	ENST00000547897;ENST00000084795;ENST00000550645;ENST00000549370
chr19:-:49355580-49356938	19	-	49355581	49356938	chr19:-:49355583-49356938	PLEKHA4	ENSG00000105559	ENST00000263265
chr19:-:49364944-49368759	19	-	49364945	49368759	chr19:-:49364758-49368759;chr19:-:49364949-49368759	PLEKHA4	ENSG00000105559	ENST00000263265
chr19:-:6679217-6679417	19	-	6679218	6679417	chr19:-:6679219-6679417	C3	ENSG00000125730	ENST00000245907;ENST00000599668
chr19:-:6730395-6730532	19	-	6730396	6730532	chr19:-:6730395-6730997	GPR108	ENSG00000125734	ENST00000264080;ENST00000537722
chr19:-:6730395-6730547	19	-	6730396	6730547	chr19:-:6730395-6730997	GPR108	ENSG00000125734	ENST00000264080;ENST00000537722
chr19:-:8032584-8038608	19	-	8032585	8038608	chr19:-:8032674-8038608;chr19:-:8038509-8038608	ELAVL1	ENSG00000066044	ENST00000351593
chr19:+:11169565-11170455	19	+	11169566	11170455	chr19:+:11169565-11170428	SMARCA4	ENSG00000127616	ENST00000592604
chr19:+:13885521-13888872	19	+	13885522	13888872	chr19:+:13885521-13886284;chr19:+:13885521-13886290;chr19:+:13885521-13888865	C19orf53	ENSG00000104979	ENST00000588234;ENST00000221576
chr19:+:45417990-45418130	19	+	45417991	45418130	chr19:+:45417990-45418128	APOC1	ENSG00000130208	ENST00000588750;ENST00000588802;ENST00000592535;ENST00000589781
chr19:+:49468866-49469063	19	+	49468867	49469063	chr19:+:49468866-49469026	FTL	ENSG00000087086	ENST00000331825
chr19:+:49994804-49994987	19	+	49994805	49994987	chr19:+:49994804-49994985	RPL13A	ENSG00000142541	ENST00000391857;ENST00000477613;ENST00000467825
chr19:+:55898039-55899297	19	+	55898040	55899297	chr19:+:55898042-55899297;chr19:+:55898061-55899297	RPL28	ENSG00000108107	ENST00000558815;ENST00000560055;ENST00000559463;ENST00000558131
chr19:+:5691422-5691542	19	+	5691423	5691542	chr19:+:5691464-5691542	RPL36	ENSG00000130255	ENST00000579649;ENST00000347512;ENST00000579446;ENST00000394580
chr19:+:7593607-7593706	19	+	7593608	7593706	chr19:+:7593589-7593706	MCOLN1	ENSG00000090674	ENST00000264079
chr2:-:170019110-170022496	2	-	170019111	170022496	chr2:-:170019110-170022441	LRP2	ENSG00000081479	ENST00000263816
chr2:-:180409696-180426512	2	-	180409697	180426512	chr2:-:180409696-180427125	ZNF385B	ENSG00000144331	ENST00000336917
chr2:-:188378373-188394090	2	-	188378374	188394090	chr2:-:188368497-188394090;chr2:-:188378373-188385268;chr2:-:188378373-188418926	TFPI	ENSG00000003436	ENST00000233156
chr2:-:211019335-211035908	2	-	211019336	211035908	chr2:-:211019335-211019917;chr2:-:211019335-211034945;chr2:-:211019335-211035060;chr2:-:211019335-211035872	KANSL1L	ENSG00000144445	ENST00000281772
chr2:-:216923699-216925432	2	-	216923700	216925432	chr2:-:216923699-216930034	PECR	ENSG00000115425	ENST00000265322
chr2:-:230670599-230672420	2	-	230670600	230672420	chr2:-:230670599-230672423	TRIP12	ENSG00000153827	ENST00000283943
chr2:-:235404480-235404622	2	-	235404481	235404622	chr2:-:235404480-235404655	ARL4C	ENSG00000188042	ENST00000390645
chr2:-:27294331-27294473	2	-	27294332	27294473	chr2:-:27294331-27294468	OST4	ENSG00000228474	ENST00000456793
chr2:-:27573256-27579605	2	-	27573257	27579605	chr2:-:27566445-27579605;chr2:-:27573499-27579605;chr2:-:27579053-27579605	GTF3C2	ENSG00000115207	ENST00000264720
chr2:+:135911446-135920148	2	+	135911447	135920148	chr2:+:135911446-135920124	RAB3GAP1	ENSG00000115839	ENST00000264158
chr2:+:209703135-209709857	2	+	209703136	209709857	chr2:+:209703135-209704709;chr2:+:209706507-209709857	PTH2R	ENSG00000144407	ENST00000487472
chr2:+:220110807-220111439	2	+	220110808	220111439	chr2:+:220110807-220111243;chr2:+:220110807-220111378;chr2:+:220110807-220111834;chr2:+:220110807-220112136	STK16	ENSG00000115661	ENST00000396738;ENST00000409516
chr2:+:242263656-242265413	2	+	242263657	242265413	chr2:+:242263656-242263823;chr2:+:242263656-242265381;chr2:+:242263656-242265407;chr2:+:242263656-242274540	2023-09-02	ENSG00000168385	ENST00000391971
chr2:+:43947888-43953420	2	+	43947889	43953420	chr2:+:43947888-43953410	PLEKHH2	ENSG00000152527	ENST00000282406
chr20:-:14308204-14308709	20	-	14308205	14308709	chr20:-:14308204-14309779;chr20:-:14308204-14318049	FLRT3	ENSG00000125848	ENST00000341420
chr20:-:14308204-14309225	20	-	14308205	14309225	chr20:-:14308204-14309779;chr20:-:14308204-14318049	FLRT3	ENSG00000125848	ENST00000341420
chr20:-:14308846-14309779	20	-	14308847	14309779	chr20:-:14308204-14309779	FLRT3	ENSG00000125848	ENST00000341420
chr20:-:17601449-17602102	20	-	17601450	17602102	chr20:-:17601452-17602102	RRBP1	ENSG00000125844	ENST00000377813;ENST00000246043
chr20:-:17641173-17660639	20	-	17641174	17660639	chr20:-:17641173-17660643;chr20:-:17641173-17662672	RRBP1	ENSG00000125844	ENST00000377813
chr20:-:33516750-33517203	20	-	33516751	33517203	chr20:-:33516754-33517203	GSS	ENSG00000100983	ENST00000216951
chr20:-:6022547-6025188	20	-	6022548	6025188	chr20:-:6022892-6025188	LRRN4	ENSG00000125872	ENST00000378858
chr20:-:6022887-6025188	20	-	6022888	6025188	chr20:-:6022892-6025188	LRRN4	ENSG00000125872	ENST00000378858
chr20:+:25196347-25197287	20	+	25196348	25197287	chr20:+:25196347-25197283	ENTPD6	ENSG00000197586	ENST00000376666
chr20:+:44755380-44756776	20	+	44755381	44756776	chr20:+:44751858-44756776;chr20:+:44755340-44756776;chr20:+:44755928-44756776	CD40	ENSG00000101017	ENST00000372285
chr20:+:57485456-57485739	20	+	57485457	57485739	chr20:+:57485456-57485737	GNAS	ENSG00000087460	ENST00000477931;ENST00000480975;ENST00000371095;ENST00000371085;ENST00000354359;ENST00000265620
chr21:-:27372495-27394155	21	-	27372496	27394155	chr21:-:27354790-27394155;chr21:-:27369731-27394155;chr21:-:27372497-27394155;chr21:-:27382228-27394155	APP	ENSG00000142192	ENST00000346798;ENST00000354192;ENST00000357903
chr22:-:30930026-30930135	22	-	30930027	30930135	chr22:-:30930026-30934813	SEC14L6	ENSG00000214491	ENST00000402034
chr22:-:51065468-51065593	22	-	51065469	51065593	chr22:-:51065480-51065593	ARSA	ENSG00000100299	ENST00000356098
chr22:+:23501420-23503065	22	+	23501421	23503065	chr22:+:23501440-23503065	RAB36	ENSG00000100228	ENST00000263116
chr3:-:100511609-100513766	3	-	100511610	100513766	chr3:-:100508360-100513766;chr3:-:100511612-100513766	ABI3BP	ENSG00000154175	ENST00000470336
chr3:-:100557308-100565215	3	-	100557309	100565215	chr3:-:100527079-100565215;chr3:-:100553617-100565215;chr3:-:100554504-100565215;chr3:-:100557308-100558412;chr3:-:100560883-100565215	ABI3BP	ENSG00000154175	ENST00000470336
chr3:-:100559702-100565215	3	-	100559703	100565215	chr3:-:100527079-100565215;chr3:-:100553617-100565215;chr3:-:100554504-100565215;chr3:-:100559702-100560841;chr3:-:100560883-100565215	ABI3BP	ENSG00000154175	ENST00000470336
chr3:-:101404763-101405325	3	-	101404764	101405325	chr3:-:101404772-101405325	RPL24	ENSG00000114391	ENST00000394077;ENST00000495401
chr3:-:107925539-107932777	3	-	107925540	107932777	chr3:-:107925543-107932777	IFT57	ENSG00000114446	ENST00000264538;ENST00000478157
chr3:-:120115836-120118729	3	-	120115837	120118729	chr3:-:120115843-120118729	FSTL1	ENSG00000163430	ENST00000295633
chr3:-:122090577-122102020	3	-	122090578	122102020	chr3:-:122081874-122102020;chr3:-:122090647-122102020	CCDC58	ENSG00000160124	ENST00000291458
chr3:-:47676831-47677511	3	-	47676832	47677511	chr3:-:47676834-47677511	SMARCC1	ENSG00000173473	ENST00000254480
chr3:+:127387427-127387983	3	+	127387428	127387983	chr3:+:127387440-127387983	PODXL2	ENSG00000114631	ENST00000342480
chr3:+:135685263-135719900	3	+	135685264	135719900	chr3:+:135684691-135719900	PPP2R3A	ENSG00000073711	ENST00000264977
chr3:+:159450203-159482231	3	+	159450204	159482231	chr3:+:158991672-159482231;chr3:+:159481679-159482231;chr3:+:159482013-159482231;chr3:+:159482139-159482231	IQCJ-SCHIP1	ENSG00000250588	ENST00000527095
chr3:+:159455690-159482231	3	+	159455691	159482231	chr3:+:158991672-159482231;chr3:+:159481679-159482231;chr3:+:159482013-159482231;chr3:+:159482139-159482231	IQCJ-SCHIP1	ENSG00000250588	ENST00000527095
chr3:+:39453510-39453806	3	+	39453511	39453806	no.hit	RPSA	ENSG00000168028	ENST00000301821;ENST00000443003
chr3:+:51737889-51738056	3	+	51737890	51738056	no.hit	TEX264	ENSG00000164081	ENST00000341333
chr3:+:52022842-52022939	3	+	52022843	52022939	chr3:+:52022842-52022926	ACY1	ENSG00000243989	ENST00000476351;ENST00000404366
chr4:-:15638296-15640130	4	-	15638297	15640130	chr4:-:15638293-15640130;chr4:-:15638299-15640130	FBXL5	ENSG00000118564	ENST00000341285;ENST00000513163
chr4:-:187525131-187525536	4	-	187525132	187525536	chr4:-:187525131-187525530	FAT1	ENSG00000083857	ENST00000441802
chr4:-:22399761-22403053	4	-	22399762	22403053	chr4:-:22394313-22403053	GPR125	ENSG00000152990	ENST00000334304
chr4:-:39458098-39459205	4	-	39458099	39459205	chr4:-:39458158-39459205	RPL9	ENSG00000163682	ENST00000295955;ENST00000506581;ENST00000504470
chr4:-:666301-667091	4	-	666302	667091	chr4:-:666308-667091	ATP5I	ENSG00000169020	ENST00000304312
chr4:-:71697351-71698023	4	-	71697352	71698023	chr4:-:71693753-71698023;chr4:-:71697391-71698023	GRSF1	ENSG00000132463	ENST00000545193
chr4:-:9828172-9836504	4	-	9828173	9836504	chr4:-:9828224-9836504	SLC2A9	ENSG00000109667	ENST00000264784
chr4:+:3425368-3427192	4	+	3425369	3427192	chr4:+:3425368-3427172;chr4:+:3425368-3427190	RGS12	ENSG00000159788	ENST00000382788
chr5:-:156463462-156464257	5	-	156463463	156464257	chr5:-:156456852-156464257;chr5:-:156459881-156464257;chr5:-:156459898-156464257	HAVCR1	ENSG00000113249	ENST00000523175
chr5:-:156485087-156485314	5	-	156485088	156485314	chr5:-:156484966-156485314;chr5:-:156485087-156485931	HAVCR1	ENSG00000113249	ENST00000523175
chr5:-:156485090-156485314	5	-	156485091	156485314	chr5:-:156484966-156485314	HAVCR1	ENSG00000113249	ENST00000523175
chr5:-:156485090-156485931	5	-	156485091	156485931	chr5:-:156484966-156485931;chr5:-:156485087-156485931	HAVCR1	ENSG00000113249	ENST00000523175
chr5:-:16483581-16505512	5	-	16483582	16505512	chr5:-:16483581-16508686	FAM134B	ENSG00000154153	ENST00000399793
chr5:-:16505632-16508686	5	-	16505633	16508686	chr5:-:16483581-16508686	FAM134B	ENSG00000154153	ENST00000399793
chr5:-:177683398-177684523	5	-	177683399	177684523	chr5:-:177683398-177683866;chr5:-:177683929-177684523	COL23A1	ENSG00000050767	ENST00000407622
chr5:-:177688749-177690208	5	-	177688750	177690208	chr5:-:177688749-177689217;chr5:-:177689253-177690208	COL23A1	ENSG00000050767	ENST00000407622
chr5:-:177690325-177695730	5	-	177690326	177695730	chr5:-:177690325-177694307;chr5:-:177694334-177695730	COL23A1	ENSG00000050767	ENST00000407622
chr5:-:34006004-34006703	5	-	34006005	34006703	chr5:-:34006004-34007877	AMACR	ENSG00000242110	ENST00000335606;ENST00000382072;ENST00000382085;ENST00000502637
chr5:-:96139642-96143562	5	-	96139643	96143562	chr5:-:96139530-96143562;chr5:-:96139642-96140523;chr5:-:96139646-96143562;chr5:-:96140643-96143562	ERAP1	ENSG00000164307	ENST00000443439
chr5:+:141520194-141524154	5	+	141520195	141524154	chr5:+:141520194-141524135	NDFIP1	ENSG00000131507	ENST00000253814
chr5:+:31267808-31294120	5	+	31267809	31294120	chr5:+:31267808-31294068	CDH6	ENSG00000113361	ENST00000265071
chr5:+:31317599-31317863	5	+	31317600	31317863	chr5:+:31317599-31317779	CDH6	ENSG00000113361	ENST00000265071;ENST00000504835
chr5:+:72795009-72798312	5	+	72795010	72798312	chr5:+:72794383-72798312;chr5:+:72795027-72798312	BTF3	ENSG00000145741	ENST00000335895;ENST00000380591
chr5:+:82818653-82832825	5	+	82818654	82832825	chr5:+:82808215-82832825;chr5:+:82818128-82832825	VCAN	ENSG00000038427	ENST00000343200
chr6:-:108214856-108215041	6	-	108214857	108215041	chr6:-:108214859-108215041	SEC63	ENSG00000025796	ENST00000369002
chr6:-:132824727-132833665	6	-	132824728	132833665	chr6:-:132824727-132834145	STX7	ENSG00000079950	ENST00000367937
chr6:-:30168900-30172432	6	-	30168901	30172432	chr6:-:30166924-30172432;chr6:-:30168860-30172432;chr6:-:30168915-30172432	TRIM26	ENSG00000234127	ENST00000453195
chr6:-:30569925-30570021	6	-	30569926	30570021	no.hit	PPP1R10	ENSG00000204569	ENST00000376511
chr6:-:31236940-31237742	6	-	31236941	31237742	chr6:-:31237302-31237742;chr6:-:31237320-31237742	HLA-C	ENSG00000204525	ENST00000376228;ENST00000383329;ENST00000376237
chr6:-:31322063-31322255	6	-	31322064	31322255	chr6:-:31322073-31322255	HLA-B	ENSG00000234745	ENST00000481849;ENST00000497377;ENST00000412585
chr6:-:33272852-33272999	6	-	33272853	33272999	no.hit	TAPBP	ENSG00000231925	ENST00000434618
chr6:-:41127620-41130780	6	-	41127621	41130780	chr6:-:41127620-41129000;chr6:-:41129351-41130780	TREM2	ENSG00000095970	ENST00000373113
chr6:-:46136034-46138680	6	-	46136035	46138680	chr6:-:46136034-46137789;chr6:-:46136034-46138544	ENPP5	ENSG00000112796	ENST00000230565
chr6:+:30867210-30867299	6	+	30867211	30867299	no.hit	DDR1	ENSG00000204580	ENST00000376569;ENST00000446312;ENST00000452441
chr7:-:140154208-140154255	7	-	140154209	140154255	no.hit	MKRN1	ENSG00000133606	ENST00000255977
chr7:-:20201493-20210336	7	-	20201494	20210336	chr7:-:20201493-20203878;chr7:-:20201493-20224611;chr7:-:20201493-20256921;chr7:-:20204022-20210336	MACC1	ENSG00000183742	ENST00000400331
chr7:-:27150379-27161767	7	-	27150380	27161767	chr7:-:27150379-27153243;chr7:-:27150379-27159134;chr7:-:27150379-27162177	HOXA3	ENSG00000105997	ENST00000317201
chr7:-:27159335-27161767	7	-	27159336	27161767	no.hit	HOXA3	ENSG00000105997	ENST00000317201
chr7:-:47481653-47512816	7	-	47481654	47512816	chr7:-:47481653-47492530;chr7:-:47481653-47520700	TNS3	ENSG00000136205	ENST00000311160
chr7:-:591107-592325	7	-	591108	592325	chr7:-:591107-618892	PRKAR1B	ENSG00000188191	ENST00000537384
chr7:-:73249332-73255399	7	-	73249333	73255399	chr7:-:73249332-73254360;chr7:-:73254450-73255399;chr7:-:73254879-73255399	WBSCR27	ENSG00000165171	ENST00000297873
chr7:-:73249332-73256819	7	-	73249333	73256819	chr7:-:73249332-73254360;chr7:-:73256474-73256819	WBSCR27	ENSG00000165171	ENST00000297873
chr7:-:73255528-73256819	7	-	73255529	73256819	chr7:-:73255528-73256347;chr7:-:73256474-73256819	WBSCR27	ENSG00000165171	ENST00000297873
chr7:-:73256474-73256652	7	-	73256475	73256652	chr7:-:73256474-73256819	WBSCR27	ENSG00000165171	ENST00000297873
chr7:-:93518532-93519448	7	-	93518533	93519448	chr7:-:93518535-93519448	TFPI2	ENSG00000105825	ENST00000222543;ENST00000451238
chr7:-:93519598-93519902	7	-	93519599	93519902	chr7:-:93519631-93519902	TFPI2	ENSG00000105825	ENST00000222543
chr7:+:116312631-116371721	7	+	116312632	116371721	chr7:+:116312631-116335803;chr7:+:116312631-116339124;chr7:+:116340338-116371721;chr7:+:116364901-116371721	MET	ENSG00000105976	ENST00000397752
chr7:+:116399544-116403163	7	+	116399545	116403163	chr7:+:116399544-116403103	MET	ENSG00000105976	ENST00000397752
chr7:+:142982091-142982437	7	+	142982092	142982437	chr7:+:142982067-142982437;chr7:+:142982091-142982440	TMEM139	ENSG00000178826	ENST00000487419;ENST00000409244
chr7:+:150501560-150501919	7	+	150501561	150501919	chr7:+:150501560-150501914	TMEM176A	ENSG00000002933	ENST00000484928;ENST00000004103;ENST00000461345;ENST00000475536;ENST00000481305
chr7:+:20431121-20434540	7	+	20431122	20434540	chr7:+:20431121-20434518	ITGB8	ENSG00000105855	ENST00000222573
chr7:+:20434608-20438485	7	+	20434609	20438485	chr7:+:20434608-20438482	ITGB8	ENSG00000105855	ENST00000222573
chr7:+:23300392-23301100	7	+	23300393	23301100	chr7:+:23300392-23306099;chr7:+:23300392-23306135	GPNMB	ENSG00000136235	ENST00000258733;ENST00000381990
chr7:+:23301184-23306135	7	+	23301185	23306135	chr7:+:23300392-23306135	GPNMB	ENSG00000136235	ENST00000258733;ENST00000381990
chr7:+:45104245-45108046	7	+	45104246	45108046	chr7:+:45104245-45108041;chr7:+:45104245-45109424;chr7:+:45104245-45112324	CCM2	ENSG00000136280	ENST00000541586
chr7:+:65821858-65823785	7	+	65821859	65823785	chr7:+:65821858-65824022;chr7:+:65821858-65824881	TPST1	ENSG00000169902	ENST00000304842
chr7:+:92021606-92025696	7	+	92021607	92025696	chr7:+:92021606-92025678	ANKIB1	ENSG00000001629	ENST00000265742
chr8:-:124704588-124705436	8	-	124704589	124705436	chr8:-:124701186-124705436	ANXA13	ENSG00000104537	ENST00000419625
chr8:-:144662756-144662777	8	-	144662757	144662777	no.hit	EEF1D	ENSG00000104529	ENST00000530109;ENST00000526838;ENST00000528610;ENST00000395119;ENST00000529007;ENST00000534377
chr8:-:144812767-144813502	8	-	144812768	144813502	chr8:-:144812767-144815860	FAM83H	ENSG00000180921	ENST00000388913
chr8:-:62531578-62550505	8	-	62531579	62550505	chr8:-:62496588-62550505;chr8:-:62531578-62546241;chr8:-:62546286-62550505	ASPH	ENSG00000198363	ENST00000379454
chr8:-:77896429-77898422	8	-	77896430	77898422	chr8:-:77896431-77898422	PEX2	ENSG00000164751	ENST00000522527
chr8:-:99057310-99057574	8	-	99057311	99057574	chr8:-:99055003-99057574;chr8:-:99057316-99057574	RPL30	ENSG00000156482	ENST00000396070;ENST00000518850;ENST00000287038
chr8:+:123875778-123885678	8	+	123875779	123885678	chr8:+:123875778-123963531	ZHX2	ENSG00000178764	ENST00000314393
chr8:+:123885833-123963531	8	+	123885834	123963531	chr8:+:123875778-123963531	ZHX2	ENSG00000178764	ENST00000314393
chr8:+:136612346-136619197	8	+	136612347	136619197	chr8:+:136533598-136619197;chr8:+:136594316-136619197;chr8:+:136605635-136619197	KHDRBS3	ENSG00000131773	ENST00000355849
chr8:+:30356857-30361802	8	+	30356858	30361802	chr8:+:30336893-30361802	RBPMS	ENSG00000157110	ENST00000397323;ENST00000339877;ENST00000519647;ENST00000522694
chr9:-:111853432-111855754	9	-	111853433	111855754	chr9:-:111853435-111855754	TMEM245	ENSG00000106771	ENST00000374586
chr9:-:115030475-115060120	9	-	115030476	115060120	chr9:-:115030475-115038123;chr9:-:115030475-115060111;chr9:-:115030475-115095749;chr9:-:115038293-115060120	PTBP3	ENSG00000119314	ENST00000374257
chr9:-:130941231-130941315	9	-	130941232	130941315	no.hit	CIZ1	ENSG00000148337	ENST00000415526
chr9:-:131398043-131398559	9	-	131398044	131398559	chr9:-:131398046-131398559	WDR34	ENSG00000119333	ENST00000372715
chr9:-:19376587-19378365	9	-	19376588	19378365	chr9:-:19376649-19378365	RPS6	ENSG00000137154	ENST00000380394;ENST00000315377
chr9:+:2645745-2646398	9	+	2645746	2646398	chr9:+:2645745-2646333	VLDLR	ENSG00000147852	ENST00000382099
chrX:-:15589919-15590326	X	-	15589920	15590326	chrX:-:15589919-15590323	ACE2	ENSG00000130234	ENST00000252519
chrX:-:2861240-2871183	X	-	2861241	2871183	chrX:-:2861240-2864038;chrX:-:2867768-2871183;chrX:-:2871033-2871183	ARSE	ENSG00000157399	ENST00000381134
chrX:+:49851527-49853069	X	+	49851528	49853069	chrX:+:49851527-49853354	CLCN5	ENSG00000171365	ENST00000376088
chrX:+:49853141-49853354	X	+	49853142	49853354	chrX:+:49851527-49853354	CLCN5	ENSG00000171365	ENST00000376088
chr1:-:152006262-152009388	1	-	152006263	152009388	chr1:-:152006276-152009388	S100A11	ENSG00000163191	ENST00000271638
chr1:-:153507794-153508424	1	-	153507795	153508424	chr1:-:153507836-153508424;chr1:-:153507851-153508424	S100A6	ENSG00000197956	ENST00000496817;ENST00000368719;ENST00000462951
chr1:-:153507829-153508424	1	-	153507830	153508424	chr1:-:153507836-153508424;chr1:-:153507851-153508424	S100A6	ENSG00000197956	ENST00000496817;ENST00000368719;ENST00000462951
chr1:-:153507836-153508605	1	-	153507837	153508605	chr1:-:153507836-153508264;chr1:-:153507836-153508424	S100A6	ENSG00000197956	ENST00000496817;ENST00000368719
chr1:-:159890327-159894246	1	-	159890328	159894246	chr1:-:159890327-159893225;chr1:-:159890327-159894283;chr1:-:159890327-159894808;chr1:-:159890327-159895239	TAGLN2	ENSG00000158710	ENST00000368097
chr1:-:186293002-186294928	1	-	186293003	186294928	chr1:-:186293002-186294895	TPR	ENSG00000047410	ENST00000367478
chr1:-:206278492-206279154	1	-	206278493	206279154	no.hit	C1orf186	ENSG00000196533	ENST00000331555
chr1:-:212002665-212003524	1	-	212002666	212003524	chr1:-:212002661-212003524;chr1:-:212002665-212002791;chr1:-:212002665-212003914	LPGAT1	ENSG00000123684	ENST00000366997
chr1:-:47649736-47650673	1	-	47649737	47650673	chr1:-:47649715-47650673	PDZK1IP1	ENSG00000162366	ENST00000489919;ENST00000294338;ENST00000491793
chr1:-:47652691-47652990	1	-	47652692	47652990	chr1:-:47650769-47652990	PDZK1IP1	ENSG00000162366	ENST00000489919;ENST00000294338
chr1:-:47653117-47655537	1	-	47653118	47655537	chr1:-:47650769-47655537;chr1:-:47653099-47655537	PDZK1IP1	ENSG00000162366	ENST00000489919;ENST00000294338
chr1:-:59041612-59041860	1	-	59041613	59041860	no.hit	TACSTD2	ENSG00000184292	ENST00000371225
chr1:-:8926132-8926337	1	-	8926133	8926337	chr1:-:8925541-8926337	ENO1	ENSG00000074800	ENST00000234590
chr1:+:151139890-151140728	1	+	151139891	151140728	chr1:+:151139890-151140619	SCNM1	ENSG00000163156	ENST00000602841;ENST00000368902
chr1:+:165619201-165624604	1	+	165619202	165624604	chr1:+:165619201-165620250;chr1:+:165623588-165624604	MGST3	ENSG00000143198	ENST00000367889;ENST00000367885
chr1:+:192548388-192548558	1	+	192548389	192548558	no.hit	RGS1	ENSG00000090104	ENST00000367459
chr1:+:24020403-24022287	1	+	24020404	24022287	chr1:+:24020403-24021149;chr1:+:24021281-24022287	RPL11	ENSG00000142676	ENST00000374550;ENST00000482370
chr1:+:46646836-46650456	1	+	46646837	46650456	chr1:+:46646836-46649862;chr1:+:46650069-46650456;chr1:+:46650340-46650456	TSPAN1	ENSG00000117472	ENST00000372003
chr10:-:73577233-73577324	10	-	73577234	73577324	chr10:-:73577233-73578373	PSAP	ENSG00000197746	ENST00000394936
chr10:-:73577387-73578373	10	-	73577388	73578373	chr10:-:73577233-73578373	PSAP	ENSG00000197746	ENST00000394936
chr10:-:73577459-73578373	10	-	73577460	73578373	chr10:-:73577233-73578373	PSAP	ENSG00000197746	ENST00000394936
chr10:-:73578481-73579221	10	-	73578482	73579221	chr10:-:73578481-73578787;chr10:-:73578868-73579221	PSAP	ENSG00000197746	ENST00000394936
chr10:-:73581764-73583814	10	-	73581765	73583814	chr10:-:73581764-73585593	PSAP	ENSG00000197746	ENST00000394936
chr10:-:73594256-73610938	10	-	73594257	73610938	chr10:-:73594262-73610938	PSAP	ENSG00000197746	ENST00000394936
chr10:-:81915664-81917396	10	-	81915665	81917396	chr10:-:81915668-81917396;chr10:-:81916254-81917396	ANXA11	ENSG00000122359	ENST00000422982;ENST00000463340
chr10:-:97442937-97443278	10	-	97442938	97443278	chr10:-:97442952-97443278	TCTN3	ENSG00000119977	ENST00000371217
chr10:-:98416691-98433379	10	-	98416692	98433379	chr10:-:98416691-98429287;chr10:-:98416691-98460559;chr10:-:98416691-98469323	PIK3AP1	ENSG00000155629	ENST00000339364
chr11:-:111779691-111782247	11	-	111779692	111782247	chr11:-:111779691-111779876;chr11:-:111779691-111781050;chr11:-:111781173-111782247	CRYAB	ENSG00000109846	ENST00000526180;ENST00000527950;ENST00000227251
chr11:-:117691606-117693120	11	-	117691607	117693120	chr11:-:117691610-117693120	FXYD2	ENSG00000137731	ENST00000292079;ENST00000260287;ENST00000534383;ENST00000533281
chr11:-:117691610-117692150	11	-	117691611	117692150	chr11:-:117691610-117693120;chr11:-:117691610-117693393	FXYD2	ENSG00000137731	ENST00000292079;ENST00000260287;ENST00000534383;ENST00000533281
chr11:-:117693322-117693393	11	-	117693323	117693393	chr11:-:117691610-117693393;chr11:-:117693195-117693393	FXYD2	ENSG00000137731	ENST00000292079;ENST00000260287;ENST00000534383;ENST00000533281;ENST00000317594
chr11:-:117693432-117693849	11	-	117693433	117693849	chr11:-:117693432-117694876;chr11:-:117693432-117695368;chr11:-:117693432-117698709	FXYD2	ENSG00000137731	ENST00000292079;ENST00000260287;ENST00000534383;ENST00000533281;ENST00000317594
chr11:-:117694936-117695368	11	-	117694937	117695368	chr11:-:117693432-117695368	FXYD2	ENSG00000137731	ENST00000292079;ENST00000260287;ENST00000534383;ENST00000533281;ENST00000317594
chr11:-:118888255-118888991	11	-	118888256	118888991	chr11:-:118888255-118888634;chr11:-:118888255-118888667;chr11:-:118888763-118888991	RPS25	ENSG00000118181	ENST00000532567;ENST00000527673
chr11:-:1774911-1775032	11	-	1774912	1775032	chr11:-:1774900-1775032	CTSD	ENSG00000117984	ENST00000236671;ENST00000433655
chr11:-:1780863-1782538	11	-	1780864	1782538	chr11:-:1780869-1782538	CTSD	ENSG00000117984	ENST00000236671;ENST00000433655
chr11:-:1780869-1782559	11	-	1780870	1782559	chr11:-:1780869-1782538	CTSD	ENSG00000117984	ENST00000236671;ENST00000433655
chr11:-:61732584-61732869	11	-	61732585	61732869	chr11:-:61732584-61732840	FTH1	ENSG00000167996	ENST00000273550;ENST00000532829;ENST00000534180;ENST00000526640;ENST00000534719;ENST00000533138
[truncated: 189 more rows]

## Sheet: LGG
junc.id	chr	strand	int.start	int.end	canonical	symbol	ensg	enst
[truncated: 497 more rows]

## Sheet: LIHC
junc.id	chr	strand	int.start	int.end	canonical	symbol	ensg	enst
[truncated: 628 more rows]

[truncated: 5 more sheets: LUAD, LUSC, MESO, PRAD, STAD]
