# Supplementary material for: Tumor-wide RNA splicing aberrations generate immunogenic public neoantigens
Source: bioRxiv preprint, doi:10.1101/2023.10.19.563178, version 1 (2023-10-20)
Supplement: Supplementary Table 2 [file 563178_file18.xlsx]

## Sheet: 2023_0812_cross_alg_all_nmers
allele	peptide	n_flank	c_flank	hlathena_presentation_score	mhcflurry_presentation_score	combined_score
HLA-A0201	GIMQKIISV	EVARRWGIQKNRPAMNYDKLSRSLRYYYEK	HC	0.997447	0.992032	0.994739
HLA-A0201	SLYQILLQV	CLKLFFQLCPVIQYWLKPPKLIKLVLQCCI	KTCCTLHLYQFLMCRLLLICTLLHFKV	0.999507	0.989538	0.994522
HLA-A2402	RYLRDVSTF	VNFLLVNGFQTAIDIFEDRIRGIDIIKWME	QKPEFVFW	0.999491	0.988515	0.994003
HLA-A2402	SYVDHFWLM	FCLLVMLFLLKLARHSKFGMKGKKGCVYLA	TNANYH	0.998029	0.989065	0.993547
HLA-A0201	RLISRIHKV	MMLKGIT	KTFSEACLMVRKPALELLHYLKNTSFAYPA	0.996457	0.989733	0.993095
HLA-A1101	SVVGNVLVRK	CSQGSGILHYAHGDSQQTHLLKQEAPWALV	RTHRVLVLKSRDRALI	0.999785	0.986355	0.99307
HLA-A0201	YLLPKKMEL	TFVLSITATTQALALIELYNAPEGRYKQDV	TDDQAKYLGLNKNGPFKPNYYRY	0.998673	0.986155	0.992414
HLA-A2402	TYLNSIPNL	QYHSCKPHATAGPLYSDNSNISRYSEKEKG	ASIHNRFLDNVFLGDRRVFPDIILE	0.999673	0.984661	0.992167
HLA-A0201	KLWERTVPTV	KDINTSELSFHCPQQPQWCGFHTPLLISFS	TTSHCPRKYLTNWRTTSKKLIRQHGIYYIV	0.999178	0.98444	0.991809
HLA-A0201	FASDTILKV	ITPELVPAQDLVCDNASWEQNTNHGAAGVP	SFN	0.989047	0.993375	0.991211
HLA-A0301	SVVGNVLVRK	CSQGSGILHYAHGDSQQTHLLKQEAPWALV	RTHRVLVLKSRDRALI	0.999532	0.980638	0.990085
HLA-A2402	SYPQVLSKW	LFLVALVMSSTRTTGDWQKFGWMNLKISST	IMEMCQSEKH	0.999485	0.980429	0.989957
HLA-A2402	LYLPGAPGF	HYTIGKEIIDLVLDRIRKLADQCTEVQAGV	HSCS	0.999624	0.979193	0.989409
HLA-A1101	AVFAKNFHVK	TYDVKVRAHTSKGPGPYSPSVQFRTLPVDQ	AVMKTSVLLSWEIPENYNSAMPFKILYDDG	0.997802	0.980038	0.98892
HLA-A0301	ALSQHVLHK	AQPHFPDGTLFDEQYSQTASYPSHSPLARG	PVCAFCEVRKL	0.997524	0.979876	0.9887
HLA-A0201	FLLPKQNHL	M	WVFPEKPVPAPKASWLEETRPNPFAALTGG	0.995294	0.981973	0.988634
HLA-A1101	KVLEGMVVRK	ANAGKDTNGSQFFITTVKTAWLDGKHVVFG	VESTKTDSRDKPLKDVIIADCGKIEVEKPF	0.999374	0.976635	0.988005
HLA-A1101	KTISYGLSINK	FIYKRKLCSTTHHVNLAKWIVRLINRYIKY	FGNVGLIDIHPNCI	0.998566	0.977021	0.987793
HLA-A0301	KVLEGMVVRK	ANAGKDTNGSQFFITTVKTAWLDGKHVVFG	VESTKTDSRDKPLKDVIIADCGKIEVEKPF	0.999838	0.975459	0.987649
HLA-A0201	TLMNFQTQV	LLLYFSECNKCDDKKERSLLPALRDVRQKS		0.980358	0.994132	0.987245
HLA-A0301	SIFSGIGKK	KRKTEPSAWSQDTGDANTNGKDWGRSWSDR	C	0.99193	0.981516	0.986723
HLA-A2402	AYLPGVCHL	GAVGVREGRVQWISMAFESVSPGSLTGCHA		0.984228	0.988228	0.986228
HLA-A0101	ALDYVLQGY	RNAQAPRHRPHEVEEATGALTLTRKCFRHL	SLLHQLDPYMKKLAAELDQLVIDSAVEKRE	0.998351	0.973251	0.985801
HLA-A0301	KTISYGLSINK	FIYKRKLCSTTHHVNLAKWIVRLINRYIKY	FGNVGLIDIHPNCI	0.996135	0.975149	0.985642
HLA-A1101	AVYSRDTWLK	HPLYALKRHLLKYEAIYPETAAILGYCRGE	KARVVRLGEVPYKMVKGFSNRARKARLAEP	0.996979	0.973835	0.985407
HLA-A1101	SIFSGIGKK	KRKTEPSAWSQDTGDANTNGKDWGRSWSDR	C	0.985933	0.984002	0.984968
HLA-A1101	SSFLFGTRK	RASNAFKTWNRKKPDHIRYQMASFPLPSSY	LIINLHSSWITCNG	0.988845	0.98103	0.984937
HLA-A1101	TSYPQVLSK	TLFLVALVMSSTRTTGDWQKFGWMNLKISS	WIMEMCQSEKH	0.997356	0.972322	0.984839
HLA-A1101	STMGAWVSTEK	QNSSSSASSEASETCQSVSECSSPTSVSSG	RRKEKREPDPNGGGPTTASGPPAAAEEAQR	0.98288	0.984856	0.983868
HLA-A0201	KLLEIPALLLA	GAEHLWLTRHLRDPFVKAAKVESYRCRSAF	SCLG	0.999642	0.967325	0.983484
HLA-A1101	ALSQHVLHK	AQPHFPDGTLFDEQYSQTASYPSHSPLARG	PVCAFCEVRKL	0.988455	0.978149	0.983302
HLA-A2402	KFQKITFQF	TTQPVYNAPRACFQGPLLIPPLRFLIMRLV	NLHILSLKHLVTLRLNLCLVQTQSQHPLTL	0.996541	0.969119	0.98283
HLA-A2402	SYGLSINKF	KRKLCSTTHHVNLAKWIVRLINRYIKYKTI	GNVGLIDIHPNCI	0.998204	0.967155	0.982679
HLA-A0301	TSYPQVLSK	TLFLVALVMSSTRTTGDWQKFGWMNLKISS	WIMEMCQSEKH	0.998487	0.966429	0.982458
HLA-A1101	ASYPSHSPLAR	GPLHYAPYHRSSAQPHFPDGTLFDEQYSQT	GALSQHVLHKPVCAFCEVRKL	0.994611	0.969069	0.98184
HLA-A0201	LLFHLLPTL	FLVPFCVICLPDRHDFNIFVHIPYLIHKCS	PLVICT	0.999455	0.964189	0.981822
HLA-A0201	HLLPTLPLV	PFCVICLPDRHDFNIFVHIPYLIHKCSLLF	ICT	0.998869	0.964742	0.981805
HLA-A1101	AVFSFFSSHR	TECTFGHDRYPHDGLYCRNGQYRKSNCVCS	SAL	0.982576	0.980469	0.981523
HLA-A1101	AVQEVIGNK	QALEGGIDPLRPPEANTKFNSRWTTDEQLL	TLTQVKTFFVSYRRRFNLEEVLQEWEAEQD	0.997102	0.965276	0.981189
HLA-A1101	SVSTETLPR	RGSRWSGGMTFAGRRAPFNPLQRYIFIYLF	S	0.996157	0.966207	0.981182
HLA-A2402	SYPDGCTLL	WDRPYSREVAAFPLVSSLNLNVPAGKAWAS	AS	0.984344	0.977224	0.980784
HLA-A0201	RLFPLRPPL	FSVVSGLEQNPLAAGFRLSPPCLPLSSQAE	RGLHIGLLQICSFCRPFSLS	0.980066	0.980829	0.980447
HLA-A0301	RLFPLRPPLR	FSVVSGLEQNPLAAGFRLSPPCLPLSSQAE	GLHIGLLQICSFCRPFSLS	0.992151	0.968126	0.980138
HLA-A1101	VVGNVLVRK	SQGSGILHYAHGDSQQTHLLKQEAPWALVS	RTHRVLVLKSRDRALI	0.997984	0.961231	0.979607
HLA-A0201	NLAKWIVRL	TYIMRFSRNFYCFVSIFIYKRKLCSTTHHV	INRYIKYKTISYGLSINKFGNVGLIDIHPN	0.985247	0.97383	0.979539
HLA-A0301	AVFSFFSSHR	TECTFGHDRYPHDGLYCRNGQYRKSNCVCS	SAL	0.986971	0.972025	0.979498
HLA-A1101	ATFAREQGFEK	SAPFISQFYKESLMKVMPYVDILFGNETEA	VKSLLLLSWIKTRKKLLIPMELEMHLLEVF	0.996866	0.96196	0.979413
HLA-A0301	AVFSFFSSH	TECTFGHDRYPHDGLYCRNGQYRKSNCVCS	RSAL	0.984167	0.973939	0.979053
HLA-A0301	RIYGQAKMKTK	QVFHISCFRCSYCNNKLRATMMKALGTDHT	RFWRDQPSLQMQGRPLTAQG	0.999638	0.957504	0.978571
HLA-A2402	YYMKIFLTKF	NQASLKIHLLLKEWRLMKLLTLMTWMNILS	GVLL	0.999488	0.956537	0.978013
HLA-A2402	IFVHIPYLI	VTGISNQVSHLFLFLVPFCVICLPDRHDFN	HKCSLLFHLLPTLPLVICT	0.997546	0.95847	0.978008
HLA-A0101	TTEIPCKY	AYDSVPSCHSIYMRQEGFLAHPSRTEVKLS	RSE	0.999445	0.955588	0.977516
HLA-A0301	AVFAKNFHVK	TYDVKVRAHTSKGPGPYSPSVQFRTLPVDQ	AVMKTSVLLSWEIPENYNSAMPFKILYDDG	0.976736	0.977142	0.976939
HLA-A2402	LYNVRSHKW	IKKEPHSPCSEISSACSQEQPFKFSYGEKC	E	0.996769	0.957096	0.976932
HLA-A0201	SLYPSTPLPV	MMVEWVGEEKENWPCLTYVFSC	SSSFRPLILVYSNCRKTYIVNDRPPCFQFC	0.991123	0.962454	0.976789
HLA-A1101	TVFSGITLTK	GISLNAVSLVNLVMSCGISVEFCSHITRAF	FGGIVVLAFAKSQIFQIFYFRMYLAMVLLG	0.999495	0.953972	0.976733
HLA-A2402	RWLPSFESLRW	STSLSLASGGGGGEKSKLRPKELPRGEISW	SQKMDKKKL	0.999685	0.953509	0.976597
HLA-A2402	RYLGNKERL	VGRVGGCAWALILCAGPRTQAWGSGLPCWG	RDPGSE	0.993929	0.958505	0.976217
HLA-A2402	LYFEELQSAF	VLIPFLEQNNFSPNTRTQKGKKNLGREFAG	YR	0.995211	0.955734	0.975473
HLA-A1101	SSFQEFLQR	REVKKRELVFLQFRLNKSSEDFSAIDYLLF	QVWLTTLTRGQLPKKVLNCFLWSLNGKILS	0.980891	0.969629	0.97526
HLA-A0101	DTDRGYYRGY	QFVLQLRPSLRGALLSLLDHYEWNCFVFLY	R	0.992443	0.957551	0.974997
HLA-A1101	ATLTQTWWK	FSKPFMTLGISILYRKPNGLVLMSGIIHTL	TILPC	0.980398	0.969349	0.974874
HLA-A0201	LMSGIIHTL	TYVREKVIDFSKPFMTLGISILYRKPNGLV	ATLTQTWWKTILPC	0.994979	0.954624	0.974801
HLA-A1101	QTDPKMLSK	KSKEEESVHVTQRKTHYSMDSLSSWYMTVT	KRTTSSQWQSPPVVVILKDMESFATKVLQD	0.985175	0.96438	0.974777
HLA-A0201	VLWMRPIAL	SNNYIIPNKSEELEARFADLSHNRPTGGRS	EMCRIIAAYVHFTLISRGI	0.980694	0.966642	0.973668
HLA-A0301	AVYSRDTWLKK	HPLYALKRHLLKYEAIYPETAAILGYCRGE	ARVVRLGEVPYKMVKGFSNRARKARLAEPQ	0.999741	0.94726	0.973501
HLA-A0201	ALFPAAPAPGL	PQARRAGGGDARCLWEACLPHWPQPRLSTL	EGPLY	0.975941	0.970911	0.973426
HLA-A0201	VLMSGIIHTL	ITYVREKVIDFSKPFMTLGISILYRKPNGL	ATLTQTWWKTILPC	0.980705	0.963498	0.972102
HLA-A0301	TVFSGITLTK	GISLNAVSLVNLVMSCGISVEFCSHITRAF	FGGIVVLAFAKSQIFQIFYFRMYLAMVLLG	0.998808	0.945374	0.972091
HLA-A0201	FLAGFVCHI	MSGRGDGGQQQLLHSK	EKNEVETNADTFCLYGVFLFLFFFSFSLFF	0.951774	0.992209	0.971992
HLA-A0201	AVFAKNFHV	TYDVKVRAHTSKGPGPYSPSVQFRTLPVDQ	KAVMKTSVLLSWEIPENYNSAMPFKILYDD	0.974038	0.969117	0.971578
HLA-A0201	KLLEIPALL	GAEHLWLTRHLRDPFVKAAKVESYRCRSAF	LASCLG	0.993245	0.949761	0.971503
HLA-A1101	AVYSRDTWLKK	HPLYALKRHLLKYEAIYPETAAILGYCRGE	ARVVRLGEVPYKMVKGFSNRARKARLAEPQ	0.999104	0.943465	0.971284
HLA-A1101	SVVGNVLVR	CSQGSGILHYAHGDSQQTHLLKQEAPWALV	KRTHRVLVLKSRDRALI	0.978798	0.963614	0.971206
HLA-A2402	RFPDQLKSANF	LEGVDRAGKSTQSRKLVEALCAAGHRAELL		0.994437	0.94666	0.970549
HLA-A0201	TLAGGSVRV	VPPGPTLLAFVEQRLSPDDSHAHRLVLRRG	PGRPGQRNFLLWAVGCPARAGDSSPGGAPV	0.98892	0.951968	0.970444
HLA-A0301	VVGNVLVRK	SQGSGILHYAHGDSQQTHLLKQEAPWALVS	RTHRVLVLKSRDRALI	0.996489	0.943088	0.969788
HLA-A0201	VLISWKTTV	LLSLFTAKYCTRGRSWAAGREQQMERSLLI	RRC	0.968986	0.970166	0.969576
HLA-A0301	RSLLPALRGK	VLATSLMWVLVDVFLLLYFSECNKCDDKKE	CL	0.98764	0.951356	0.969498
HLA-A1101	RSIFSGIGK	GKRKTEPSAWSQDTGDANTNGKDWGRSWSD	KC	0.951147	0.987311	0.969229
HLA-A1101	GQADTVKVPK	GLGNPMAVVSKQVNMELAKIKQKCPLYEAN	EKDEMVEQEFNRLLEATSYLSHQLDFNVLN	0.975394	0.962431	0.968913
HLA-A2402	AYFIVTRQL	LAWLTWWVYSWDIMEPVTYFITFANSMVFF	LRVGNFFSSSTRNQSNSTLMCSNTTS	0.987744	0.949402	0.968573
HLA-A0201	SLGASVHKV	TEKAGFKRAFIITGQTYTRKVDIEVLSVLA	IERRIRQELPFMATENIIMAMVKAGGSRQD	0.969061	0.967182	0.968122
HLA-A0201	SLGASVHKV	TEKAGFKRAFIITGQTYTRKVDIEVLSVLA	IERRIRQELPFMATENIIMAMVKAGGSRQV	0.969046	0.967182	0.968114
HLA-A2402	VYLLPKKMEL	PTFVLSITATTQALALIELYNAPEGRYKQD	TDDQAKYLGLNKNGPFKPNYYRY	0.997798	0.938273	0.968035
HLA-A2402	VYNAPRACF	EVTPHAFTPSSRQQDLVSTVNVVYSQTTQP	QGPLLIPPLRFLIMRLVKFQKITFQFNLHI	0.963763	0.971349	0.967556
HLA-A0301	AVYSRDTWLK	HPLYALKRHLLKYEAIYPETAAILGYCRGE	KARVVRLGEVPYKMVKGFSNRARKARLAEP	0.966653	0.968266	0.967459
HLA-A0201	SLLPALRDV	LATSLMWVLVDVFLLLYFSECNKCDDKKER	RQKSTLMNFQTQV	0.984801	0.949621	0.967211
HLA-A0101	LSEELGYRY	YMDASTRPTILLLPGLTGTSKESYILHMIH	Q	0.999763	0.933873	0.966818
HLA-A2402	AYFIVTRQLL	LAWLTWWVYSWDIMEPVTYFITFANSMVFF	RVGNFFSSSTRNQSNSTLMCSNTTS	0.981741	0.950336	0.966039
HLA-A0101	VLDVFGAAGY	GPEVGGSIGLMFYLANVCGCAVSLLGLVES	AEDYTTGAVMNFASVFAVLFNGCTGIMAGA	0.99587	0.934196	0.965033
HLA-A0301	RSIFSGIGKK	GKRKTEPSAWSQDTGDANTNGKDWGRSWSD	C	0.991326	0.93844	0.964883
HLA-A0201	ILAPARPSI	TMEEFKDFNKYVAYIESQGAHRAGLAKVGD	SLRRGPADILGPSSASPTGVACARGMCFGA	0.983801	0.945846	0.964823
HLA-A0201	ALSSSLLLL	GREKPSHLALPPLPTVAYSALLSSQGGSSC	ALF	0.951406	0.978195	0.9648
HLA-A2402	AYNFYGFLI	QYHPVVHPLDLKYDPDPGESVSICGKNEAS	FF	0.992568	0.936036	0.964302
HLA-A0201	KLLEIPALLL	GAEHLWLTRHLRDPFVKAAKVESYRCRSAF	ASCLG	0.998817	0.928486	0.963651
HLA-A0101	ITFLPPKGLLY	KKLKHRRTSETSISPPGSSIGSPNRVICVC	S	0.998679	0.928309	0.963494
HLA-A0301	ASYPSHSPLAR	GPLHYAPYHRSSAQPHFPDGTLFDEQYSQT	GALSQHVLHKPVCAFCEVRKL	0.973787	0.952637	0.963212
HLA-A0301	SLLPALRGK	LATSLMWVLVDVFLLLYFSECNKCDDKKER	CL	0.983745	0.942265	0.963005
HLA-A0201	HLGPAVQAV	LSGDLGLGPCARPLPPVVGQGQPPGAGEDA	PRTRGLPGEAPGRAALPQQAGLAHPAGLLR	0.947275	0.978467	0.962871
HLA-A2402	VYLASYVDHF	SVVGFCLLVMLFLLKLARHSKFGMKGKKGC	WLMTNANYH	0.98826	0.937296	0.962778
HLA-A1101	QTQKGTVLK	MEENMEEG	AFICN	0.975027	0.949591	0.962309
HLA-A2402	SYFMRPQLL	TLRLNLCLVQTQSQHPLTLLLVKCYLLQLS	LVLKYCYNLPFRLLMLTPCLKLFFQLCPVI	0.980866	0.942406	0.961636
HLA-A1101	AGFPGPTLR	LASVLLLLLWAPALSLLAGSRSHRLPLLLR	AGHR	0.97379	0.949375	0.961582
HLA-A1101	SIFSGIGK	KRKTEPSAWSQDTGDANTNGKDWGRSWSDR	KC	0.99256	0.930428	0.961494
HLA-A0201	PLSPHVPTV	LRCPGPKDCWSERCRIQGPHQCQTSGKSHS	HSTDACWVPAGCWLWGGTVGGRHRLPKLRE	0.99549	0.927221	0.961356
HLA-A0301	RIWPASAHPR	AGTPSRAPATSTFPHEGAGRRQRPSAGCTA	NRTSSTTGTGSTSGSDSTTGPSKATSCGRM	0.947986	0.974592	0.961289
HLA-A0201	NIFVHIPYL	IVTGISNQVSHLFLFLVPFCVICLPDRHDF	IHKCSLLFHLLPTLPLVICT	0.978756	0.94363	0.961193
HLA-A1101	STSYPQVLSK	HTLFLVALVMSSTRTTGDWQKFGWMNLKIS	WIMEMCQSEKH	0.998638	0.923226	0.960932
HLA-A0201	RLFHHSLLL	SVVIPVTGDSEGATVQVKFSELLWGGKGHR	RMSSLLSNALLPADTS	0.941828	0.979129	0.960479
HLA-A0201	YLLAPVRSL	AMAERKPQDVWVLLPEHSLVPGCLDGGGVQ	SGDLGLGPCARPLPPVVGQGQPPGAGEDAH	0.986653	0.93401	0.960331
HLA-A2402	KWSDYILTL	PDEIGPKHWPTSRFAHVMKLRQAALRTARE	NLLIAENKTIVAPMLESRGLYSNFWCGITP	0.983214	0.937276	0.960245
HLA-A1101	AQNARVIVFK	NAPKSVLGKVKIFEKMDHKARLQRMQELQE	LHIINKSFK	0.983722	0.936305	0.960014
HLA-A2402	SYPSSAIYRW	DNGILLYNGDNDHIAVELYQGHVRVSYDPG		0.974827	0.943731	0.959279
HLA-A0201	HLAEVAEYL	KKGCLARVKKLSSPDNVNCRDTQGRHSTPL	LQHGADVNAQDKGGLIPLHNAASYGHVDVA	0.986185	0.931637	0.958911
HLA-A0101	TTDQVPRQKY	MASGRRGWDSSHEDDLPVYLARPG	GGMFCNVEGAFESKT	0.999004	0.918779	0.958892
HLA-A2402	DYLKRNVKW	LSEPAKPAHSQNQSNFSSYSSKFLGSYTSY		0.992186	0.925584	0.958885
HLA-A0201	SLLLPSFHL	PEPGEDPRVTRAKYFIRDEFLDQHCQWRWA	RCGH	0.941044	0.975672	0.958358
HLA-A2402	IFLSLFPKL	RDPRLSKREESIAKIGKKKYQKINLDEAEG	RATEQMTNVGC	0.994489	0.92195	0.95822
HLA-A1101	KTLAFCVTK	DDKKERSLLPALRAWCRTIAGDLVWAFGGK	VFMLFVSHLSGLMFFNL	0.95954	0.956121	0.95783
HLA-A0301	QTDPKMLSK	KSKEEESVHVTQRKTHYSMDSLSSWYMTVT	KRTTSSQWQSPPVVVILKDMESFATKVLQD	0.976015	0.938907	0.957461
HLA-A0301	AQNARVIVFK	NAPKSVLGKVKIFEKMDHKARLQRMQELQE	LHIINKSFK	0.972677	0.942147	0.957412
HLA-A0301	RTHRVLVLK	AHGDSQQTHLLKQEAPWALVSVVGNVLVRK	SRDRALI	0.99188	0.922503	0.957192
HLA-A0301	SLNGKILSSR	SFQEFLQRQVWLTTLTRGQLPKKVLNCFLW	KSKI	0.988312	0.925787	0.957049
HLA-A2402	RWLPSFESL	STSLSLASGGGGGEKSKLRPKELPRGEISW	RWSQKMDKKKL	0.985994	0.928086	0.95704
HLA-A0201	KSLPEVYSV	MQVSSLNEVKIYSLSCG	AQAGVQWHNHGSPQP	0.947263	0.965947	0.956605
HLA-A0301	VMSPVSVYK	KKDHISRAFAGASQTHTLTSECPIPAFPHL	VESNYLSLL	0.997164	0.914859	0.956011
HLA-A1101	AIIGPNGSAQR	MGFLKLIEIENFKSYKGRQIIGPFQRFT	PLSPRIGTLQLLSTLLWRRHF	0.998353	0.913658	0.956005
HLA-A2402	YFIVTRQLL	AWLTWWVYSWDIMEPVTYFITFANSMVFFA	RVGNFFSSSTRNQSNSTLMCSNTTS	0.944513	0.967001	0.955757
HLA-A1101	GTILGTGVEK	TGVACARGMCFGATPSSFTSACLWSSNNVP	WPVQALAPGSWQGVVRTHSHTAVKPRGSGP	0.998016	0.912517	0.955266
HLA-A0301	RLSVFPLQER	WATGKAEGAGFATTQTPLWLLGEVEAPRGG	KRGRDEELFL	0.965434	0.944967	0.9552
HLA-A0201	SLLQVPHRL	SYCLIDSFLGDSELIGDLTQCVDCVIPPEG	LTLTLLPSLELCLLCGPSPPLSQLYPQLLE	0.997938	0.912038	0.954988
HLA-A0201	QLWDIAGALHL	DSFSKHYKSTVGVDFALKVLQWSDYEIVRL	YDTIVLSGCLCLCYYV	0.997498	0.910392	0.953945
HLA-A1101	RTHRVLVLK	AHGDSQQTHLLKQEAPWALVSVVGNVLVRK	SRDRALI	0.981675	0.92552	0.953597
HLA-A0201	FMRPQLLLV	RLNLCLVQTQSQHPLTLLLVKCYLLQLSSY	LKYCYNLPFRLLMLTPCLKLFFQLCPVIQY	0.943685	0.963047	0.953366
HLA-A0201	KLREFTFQL	VPTVHSTDACWVPAGCWLWGGTVGGRHRLP		0.920142	0.985641	0.952891
HLA-A2402	AYNFYGFLIFF	QYHPVVHPLDLKYDPDPGESVSICGKNEAS		0.994176	0.910018	0.952097
HLA-A0301	ATFAREQGFEK	SAPFISQFYKESLMKVMPYVDILFGNETEA	VKSLLLLSWIKTRKKLLIPMELEMHLLEVF	0.954832	0.94888	0.951856
HLA-A1101	AVFSFFSSH	TECTFGHDRYPHDGLYCRNGQYRKSNCVCS	RSAL	0.92896	0.974665	0.951813
HLA-A2402	TFQKPEFVFW	GFQTAIDIFEDRIRGIDIIKWMERYLRDVS		0.969839	0.933616	0.951727
HLA-A0301	SIFSGIGK	KRKTEPSAWSQDTGDANTNGKDWGRSWSDR	KC	0.999603	0.900078	0.94984
HLA-A1101	TTLTRGQLPK	RLNKSSEDFSAIDYLLFSSFQEFLQRQVWL	KVLNCFLWSLNGKILSSRKSKI	0.992484	0.906387	0.949435
HLA-A1101	ASWPTSARK	SQAKKMLPITMPEGTTPLARRSLTSCWTEF	SKLEFSIYPAPQVSTAV	0.95708	0.941317	0.949198
HLA-A1101	RSIFSGIGKK	GKRKTEPSAWSQDTGDANTNGKDWGRSWSD	C	0.942673	0.954676	0.948675
HLA-A0301	ALIPGTAARR	AAGDTRGRPWDPARHPTRTRCPRRLRAAER	RLHAVPVHGHVGLRGAGGVTGPLPGHGLQL	0.987958	0.908112	0.948035
HLA-A0101	VVDLYSPEY	M	PGPSHRIKKTVQVEQSKVLIKEGGVQLLLT	0.997713	0.898263	0.947988
HLA-A1101	ADFEYRTTK	RGRGGGRGGTFTAPRGFRGGFRGGRGGREF	LLH	0.972739	0.922505	0.947622
HLA-A1101	VSVVGNVLVRK	SCSQGSGILHYAHGDSQQTHLLKQEAPWAL	RTHRVLVLKSRDRALI	0.991122	0.903925	0.947524
HLA-A1101	TTFVQDTCMPK	ASAAAAELQASGGPRHPVCLLVLGMAGSGK	ALHRM	0.979615	0.914754	0.947184
HLA-A0101	GTDHTRIY	LLANQQVFHISCFRCSYCNNKLRATMMKAL	GQAKMKTKRFWRDQPSLQMQGRPLTAQG	0.998972	0.894874	0.946923
HLA-A0201	AIMSAVPFL	SLAFMLVEGNFVLFCTYTLGFRNEFQNLLL	ILVALMESNLIITYAVAVAAGISVAAAFLL	0.962855	0.929662	0.946259
HLA-A0101	SLEVATYRY	ALEQEKQGLQSQIAQVLEGRQQLAHLKMSL	ETSPVHPGTQRHTHMLGQTTWLKGTRGVGD	0.988345	0.903855	0.9461
HLA-A0201	AIVESPPGV	PPSSVWTIEPHPAPRTAPGRLHLLVLQAAQ	QNGASASCHSGPLKSPM	0.97553	0.915199	0.945365
HLA-A1101	AAKDVIVSR	FIQEGARLGRTPAEVVSTCDITFACVSDPK	GGRFLEAPVSGNQQLSNDGMLVILAAGDRG	0.961461	0.929224	0.945343
HLA-A1101	MSMPSLPPR	KIISNASCTTNCLAPLAKVIHDNFGIVEGL	RLWMAPPGNCGVMAAGLSRTSSLPLLALPR	0.914835	0.973146	0.94399
HLA-A1101	STCAAVATPR	SGPGTLSATFCLRLWDCSWPRAWPALRSCW	MLGLACWLGPRSRQSTHSRMHSTT	0.915436	0.970928	0.943182
HLA-A2402	YYFAWTLGF	YNIDEHFQATASWPTKIIYLYISLLAARPK	GFRGYDENGAARWDLISNLRIQQIEMSTSF	0.990138	0.893986	0.942062
HLA-A0101	YFEELQSAFY	LIPFLEQNNFSPNTRTQKGKKNLGREFAGL	R	0.974012	0.90939	0.941701
HLA-A1101	VILPPWSPK	EPWKENISCSSTTFIKSTICLKMGCPGWPQ	AQRLQV	0.993782	0.88924	0.941511
HLA-A1101	QADTVKVPK	LGNPMAVVSKQVNMELAKIKQKCPLYEANG	EKDEMVEQEFNRLLEATSYLSHQLDFNVLN	0.954938	0.92749	0.941214
HLA-A1101	ALIPGTAARR	AAGDTRGRPWDPARHPTRTRCPRRLRAAER	RLHAVPVHGHVGLRGAGGVTGPLPGHGLQL	0.987815	0.894477	0.941146
HLA-A1101	TIQPPVPVPK	MRRLLAQHATSECPKRTQPCTYCTKEFVFD	AACCLPQPMWCGHCGSGGPARPSEGQL	0.999403	0.882373	0.940888
HLA-A1101	QVILPPWSPK	EEPWKENISCSSTTFIKSTICLKMGCPGWP	AQRLQV	0.997808	0.883305	0.940557
HLA-A1101	ATPALPSTVLR	FTDLQNWPRANITLQLSCTRAMCVSATTQA	RSTMGNSTPLSWLPLTRW	0.984233	0.896538	0.940386
HLA-A0301	VILPPWSPK	EPWKENISCSSTTFIKSTICLKMGCPGWPQ	AQRLQV	0.997116	0.882986	0.940051
HLA-A0301	ALIPGTAAR	AAGDTRGRPWDPARHPTRTRCPRRLRAAER	RRLHAVPVHGHVGLRGAGGVTGPLPGHGLQ	0.911778	0.967938	0.939858
HLA-A1101	ATVSWSCPR	MQPAKIA	CATSQRGWTSCRPRPSSPRRSCSLSTGALR	0.952188	0.926473	0.939331
HLA-A1101	RVSVGEIVTR	GRRGCPRENKTHCFNLALNQPKNNFKCKCF	NQQMSGKENSLTEIWLMIQKNSFKI	0.974457	0.904136	0.939296
HLA-A0201	SLPEVYSV	MQVSSLNEVKIYSLSCGK	AQAGVQWHNHGSPQP	0.999759	0.878681	0.93922
HLA-A1101	SVVGNVLVRKR	CSQGSGILHYAHGDSQQTHLLKQEAPWALV	THRVLVLKSRDRALI	0.986357	0.891624	0.938991
HLA-A1101	GTFGEYRSLER	IRRNKGGKYPVKEKEDAHADPEIQPMKEDD		0.980507	0.897457	0.938982
HLA-A0301	KQIIKLLPSK	NTPGFMYKNLQCLVIDEADRILDVGFEEEL		0.964658	0.910412	0.937535
HLA-A0201	SLSQGFLHL	RADAESLLSLCKEGSYLVRLSETNPQDCSL	KFARTRENQVVLGQHSGPFPSVPELVLHYS	0.946383	0.928302	0.937342
HLA-A1101	IVFKLHIINK	LGKVKIFEKMDHKARLQRMQELQEAQNARV	SFK	0.995494	0.877972	0.936733
HLA-A1101	SVFPLQERK	TGKAEGAGFATTQTPLWLLGEVEAPRGGRL	RGRDEELFL	0.996378	0.876173	0.936275
HLA-A0301	RLINRYIKY	RNFYCFVSIFIYKRKLCSTTHHVNLAKWIV	KTISYGLSINKFGNVGLIDIHPNCI	0.995115	0.875381	0.935248
HLA-A0301	AVQEVIGNK	QALEGGIDPLRPPEANTKFNSRWTTDEQLL	TLTQVKTFFVSYRRRFNLEEVLQEWEAEQD	0.918706	0.95121	0.934958
HLA-A1101	STFPHEGAGR	YVCLAMGGTCAMLASASATPAGTPSRAPAT	RQRPSAGCTARIWPASAHPRNRTSSTTGTG	0.935369	0.934481	0.934925
HLA-A0301	RLPPVSLVR	SAKMLMFVNISPLEENVSESLNSLRFASKV	TRGWL	0.996175	0.873218	0.934696
HLA-A1101	GSAPPAGPR	SRGHLIVQLQELLHHWVLWSAVKSRWVIVA	YSSGLIPTSRCCWTSSTT	0.966195	0.902959	0.934577
HLA-A0201	LALPPLPTV	KPTNTQGKPLCPWAPPGSPYLYWGREKPSH	AYSALLSSQGGSSCALSSSLLLLALF	0.979128	0.889572	0.93435
HLA-A0201	SLSRWVARV	LLYSGLSSCSSHRLAYILGREMLITCAICI	FEISPFEPWITRDKVERT	0.887369	0.981029	0.934199
HLA-A0201	KQLNIIQRL	QAAAKVDVEFDYDGPLMKTEVPGPRSQELM	CIFSAITKRAEAITWLMWTATECWIFIPRS	0.900287	0.967793	0.93404
HLA-A0301	RLFHHSLLLR	SVVIPVTGDSEGATVQVKFSELLWGGKGHR	MSSLLSNALLPADTS	0.991388	0.875886	0.933637
HLA-A0301	HMFPREIVSR	DRKEVVNIQTWINKPDVKHHFPCKEVKESG	KGLAYIQSRQALNSVVKITSKKKHPELITF	0.965255	0.901244	0.93325
HLA-A1101	QIIKLLPSK	TPGFMYKNLQCLVIDEADRILDVGFEEELK		0.929171	0.937235	0.933203
HLA-A1101	RSLPSLVKR	LTTYKSEIKYSCQEPYYKMLNNNTECGQPS	IIGGRNAEPGLFPWQALIVVEDTSRVPNDK	0.946507	0.919781	0.933144
HLA-A1101	RSLLPALRGK	VLATSLMWVLVDVFLLLYFSECNKCDDKKE	CL	0.9233	0.942894	0.933097
HLA-A0101	FTEHLLRAVY	SEPPAEECRMTPRHAGCDVTEMQRILSQPT		0.977611	0.888515	0.933063
HLA-A1101	VMSPVSVYK	KKDHISRAFAGASQTHTLTSECPIPAFPHL	VESNYLSLL	0.947816	0.917342	0.932579
HLA-A0301	TIQPPVPVPK	MRRLLAQHATSECPKRTQPCTYCTKEFVFD	AACCLPQPMWCGHCGSGGPARPSEGQL	0.997179	0.867956	0.932567
HLA-A1101	GSLQLPPPR	NPNEPWVICSVSEDNIMQVWQMAGVQWCNL	FDRFSCLSLLSSWDYRCVPPCLANFFVFSV	0.95538	0.908941	0.93216
HLA-A1101	RTVQVSVVR	SVEVDGSKLNVTSTWNLASPLLSVSVDGTQ	ISLEGLLKSRILVSTCVANT	0.952894	0.911217	0.932055
HLA-A0201	GLSPLTLLI	KSTSSAMSGSHQDLSVIQPIVKDCKEVTHQ	LVSSHH	0.967887	0.895588	0.931738
HLA-A1101	HTVPTGGLK	QIHLITRMFECDVCHKFMKTPEQLLEHKKC		0.881725	0.98168	0.931703
HLA-A2402	SYLSLPLGL	SREVAAFPLTESRSVAQAGVQWHDPGFTPF	QAPATMPG	0.976414	0.885562	0.930988
HLA-A0201	FLVEMGFHCV	PPGFTPFSCLSHPSSWDYRCPPPHPANFFV	SQDGLDLLTL	0.979562	0.881178	0.93037
HLA-A0301	HMFPREIVSRK	DRKEVVNIQTWINKPDVKHHFPCKEVKESG	GLAYIQSRQALNSVVKITSKKKHPELITFK	0.969011	0.891712	0.930361
HLA-A0201	RQFEESEFQAL	TFPECNCPDADIQAMEDSLLQIQDSWATHN	LKRLPDDRFLNSTAISQFWAMDTSLQHRYQ	0.981705	0.878926	0.930316
HLA-A2402	YYTYIFTNLL	DKTATIIIHANASMSHTILLKAAELGMVSA	SSALLFDAVYAVVTAVQELNRSQEIGVKPL	0.954335	0.906221	0.930278
HLA-A0301	SVSTETLPR	RGSRWSGGMTFAGRRAPFNPLQRYIFIYLF	S	0.945664	0.914719	0.930192
HLA-A1101	RIYGQAKMKTK	QVFHISCFRCSYCNNKLRATMMKALGTDHT	RFWRDQPSLQMQGRPLTAQG	0.991513	0.868764	0.930138
HLA-A0201	YVIPPQASL	KGMDQGLLGMCPGERRKIIIPPFLAYGEKG	VFHVLLIDVHNPKDAVQLETLELPPGCVRR	0.887442	0.972751	0.930096
HLA-A0301	RIYGQAKMK	QVFHISCFRCSYCNNKLRATMMKALGTDHT	TKRFWRDQPSLQMQGRPLTAQG	0.993595	0.866584	0.93009
HLA-A1101	KVLEGMVVR	ANAGKDTNGSQFFITTVKTAWLDGKHVVFG	KVESTKTDSRDKPLKDVIIADCGKIEVEKP	0.879897	0.980103	0.93
HLA-A0301	ALNQPKNNFK	FSTLFAFFFCGGGVGRRGCPRENKTHCFNL	CKCFRVSVGEIVTRNQQMSGKENSLTEIWL	0.99171	0.866966	0.929338
HLA-A1101	VTQTDPKMLSK	DIKSKEEESVHVTQRKTHYSMDSLSSWYMT	KRTTSSQWQSPPVVVILKDMESFATKVLQD	0.976225	0.881624	0.928925
HLA-A0301	AIIGPNGSAQR	MGFLKLIEIENFKSYKGRQIIGPFQRFT	PLSPRIGTLQLLSTLLWRRHF	0.979158	0.878155	0.928656
HLA-A0101	FLPPKGLLY	LKHRRTSETSISPPGSSIGSPNRVICVCIT	S	0.997839	0.858893	0.928366
HLA-A1101	TTFIKSTICLK	YKFIQLSEFGFGQVIIVSEEPWKENISCSS	MGCPGWPQVILPPWSPKAQRLQV	0.978548	0.877989	0.928269
HLA-A2402	HYVGDLRSL	SAFETAENILGVTNFIHMLSRSRVRLSWAT	RLNSGNAFGKKYPLIRASYESKGSRGLFIL	0.885206	0.970181	0.927694
HLA-A0201	GMGPGVLEL	RGLPWGACCSSSWFCCCCSAQVWELGWGFL	AGLQGTHAPSQGQTN	0.953831	0.901082	0.927456
HLA-A0201	FLFLVPFCV	VMVSGFTQGHQTKPLRAEIVTGISNQVSHL	ICLPDRHDFNIFVHIPYLIHKCSLLFHLLP	0.965977	0.888079	0.927028
HLA-A0201	VLVPQPPEYL	PSDGVGLSCPGWSAMAQSQLTAASASQVQA	GL	0.993964	0.859768	0.926866
HLA-A0201	GLIDIHPNCI	LAKWIVRLINRYIKYKTISYGLSINKFGNV		0.964917	0.888696	0.926806
HLA-A1101	AAFPLTESR	DPRVNPLKMSPHSLTCVTSSHWDRPYSREV	SVAQAGVQWHDPGFTPFSYLSLPLGLQAPA	0.936131	0.917358	0.926744
HLA-A2402	YFLPIQTQKL	MTGSHHTRSSSAMTVGPGGEVGTTAVGWTQ	QC	0.951281	0.902046	0.926664
HLA-A1101	ASVHKVIER	AGFKRAFIITGQTYTRKVDIEVLSVLASLG	RIRQELPFMATENIIMAMVKAGGSRQVQRF	0.947991	0.904954	0.926473
HLA-A1101	ASVHKVIER	AGFKRAFIITGQTYTRKVDIEVLSVLASLG	RIRQELPFMATENIIMAMVKAGGSRQDCHE	0.947869	0.904954	0.926411
HLA-A1101	GSYTSYDYLK	HIAASHLSEPAKPAHSQNQSNFSSYSSKFL	RNVKW	0.921081	0.931133	0.926107
HLA-A2402	ILPPRSQNW	GSAPQPPKTKLPSTPCVPDPTKQAEEILNA	RRKRETWRGK	0.966177	0.885609	0.925893
HLA-A0301	STSYPQVLSK	HTLFLVALVMSSTRTTGDWQKFGWMNLKIS	WIMEMCQSEKH	0.961035	0.890441	0.925738
HLA-A1101	SLLPALRGK	LATSLMWVLVDVFLLLYFSECNKCDDKKER	CL	0.923646	0.927745	0.925695
HLA-A0201	YILPLLLGL	MPARSLLFACP	SRFLVSYSDSHPF	0.994681	0.855032	0.924856
HLA-A0201	KIFLTKFGV	SLKIHLLLKEWRLMKLLTLMTWMNILSYYM	LL	0.918931	0.930707	0.924819
HLA-A0301	KLHIINKSFK	VKIFEKMDHKARLQRMQELQEAQNARVIVF		0.946401	0.903077	0.924739
HLA-A2402	FFAQPDRATLW	YQVKGWKLTQQQFVALLWKRLLIARRSRKG	QVPQPGTSALDVQRTVHICQQ	0.968465	0.880854	0.92466
HLA-A1101	ISYGLSINK	YKRKLCSTTHHVNLAKWIVRLINRYIKYKT	FGNVGLIDIHPNCI	0.979307	0.869361	0.924334
HLA-A0301	IVFKLHIINK	LGKVKIFEKMDHKARLQRMQELQEAQNARV	SFK	0.998815	0.848593	0.923704
HLA-A2402	TFLPPKGLLY	KLKHRRTSETSISPPGSSIGSPNRVICVCI	S	0.965112	0.881184	0.923148
HLA-A0201	VVWDCIPKL	GVKEAVTTLIASGVSIKMITGDSQETAVAI	PSQSQEKK	0.939376	0.906866	0.923121
HLA-A0101	LTIGKDSGVSY	SSTVSYLKKEDSVSQSSSDAGLGSDHESDT	SGGA	0.923321	0.922707	0.923014
HLA-A0201	SLTEIWLMI	QPKNNFKCKCFRVSVGEIVTRNQQMSGKEN	QKNSFKI	0.929988	0.915895	0.922941
HLA-A2402	KFADDMQEF	PGVGEELKQAKEIEDAEKYSFMATVTKAPK	TKFPTKTGRRSLSRSISQSSTDSYSSAASY	0.949881	0.895801	0.922841
HLA-A1101	GALSQHVLHK	SAQPHFPDGTLFDEQYSQTASYPSHSPLAR	PVCAFCEVRKL	0.95157	0.893595	0.922583
HLA-A0101	ALDAGTAKAY	YERLKKSLANAESQQQREQLERLRKDMGSV	LLCCTLLI	0.978529	0.866558	0.922544
HLA-A0301	RVSGAVTVR	LSLEPASLEGGRRVPGRAPENCAVAFSAET	PASRFISDAG	0.918388	0.926506	0.922447
HLA-A2402	GYKSNGLSHSW	GNGVAGTNIIIGIIAGTILVLALILGITAW	SERIPDTKHISDICENGRPRSNSWQGNLGG	0.977564	0.866278	0.921921
HLA-A0201	YIFIYLFSV	AKDPVNRRGSRWSGGMTFAGRRAPFNPLQR	STETLPRS	0.979127	0.863022	0.921074
HLA-A2402	HYVGDLRSLRL	SAFETAENILGVTNFIHMLSRSRVRLSWAT	NSGNAFGKKYPLIRASYESKGSRGLFILGT	0.909929	0.931127	0.920528
HLA-A2402	CYNGIHWLL	SRQFVKDSIRLVKRCTKPDRKDCHGNSNRI	CEIDPYSY	0.976934	0.863722	0.920328
HLA-A1101	LVIDSTSIRGR	GLTPVFGPYTRPSESELWDMWAGIRNNDGN	SSEGAGWELLPL	0.975655	0.863747	0.919701
HLA-A0201	NLQSFLFSV	EVPASLLELRALQTLSLGGNQLQSIPAEIE	AVPTTICGVQ	0.900994	0.938267	0.919631
HLA-A0201	IMDAANFFL	PVKKLVVKGGKKKKQVLKFTLDCTHPVEDG	QERIKVNGKAGNLGGGVVTIERSKSKITVT	0.914522	0.923806	0.919164
HLA-A0301	RVKDARLQR	APMLEVALTLIDSWCKDHSYVIAGYYQANE	RWPPESPRASATLRSSW	0.938357	0.898734	0.918546
HLA-A1101	ASFPALFPPR	CAGGRVHLAQRLGLGNGHYRKKMNVPRPQT	LASPAPRPLVSGLFFLGERRWRWGGTWRRG	0.995655	0.841291	0.918473
HLA-A0201	SLPVFLPPV	LCSFHKIPPACSSCQQSASIKMDPLLCSVP	SSPGSLEIKTG	0.950766	0.885418	0.918092
HLA-A1101	GIFLSLFPK	ARDPRLSKREESIAKIGKKKYQKINLDEAE	LRATEQMTNVGC	0.994768	0.841119	0.917944
HLA-A2402	IYIECADHTL	RLRCEKEAVLQRCHCRMVHMPGNETICPPN	DLA	0.971601	0.864185	0.917893
HLA-A0201	MLIIVVSAV	FIHMIQMLYYVKDIPATLKFFHSLLGTNAK	AGTSCGKSTDHAFPRMTSASISHQMTSLRC	0.909457	0.92606	0.917758
HLA-A0201	ALSFRAPQV	PGVPLGVRCRERPQVGPGLEGARPPPERVL	QSCTPRAREAVVPALPGLPHGARPPSRGLG	0.934306	0.900795	0.917551
HLA-A0301	KVLEGMVVR	ANAGKDTNGSQFFITTVKTAWLDGKHVVFG	KVESTKTDSRDKPLKDVIIADCGKIEVEKP	0.86584	0.968929	0.917385
HLA-A0201	LLFSVVSGL	EELLRSQLYPEVPPEEFRPFLAKMRGILKV	EQNPLAAGFRLSPPCLPLSSQAERLFPLRP	0.983836	0.850186	0.917011
HLA-A2402	KHITYIMRF	LLCVCRLDWANGYYRQQRKLVEEIGWSYTG	SRNFYCFVSIFIYKRKLCSTTHHVNLAKWI	0.924323	0.909369	0.916846
HLA-A2402	TYIVNDRPPCF	VFSCSLYPSTPLPVSSSFRPLILVYSNCRK	QFCDREERHWGYRELFPLLQWAPEGKVGGQ	0.994975	0.836566	0.915771
HLA-A2402	VYLASYVDHFW	SVVGFCLLVMLFLLKLARHSKFGMKGKKGC	LMTNANYH	0.994085	0.836778	0.915432
HLA-A0201	YLFSVSTETL	VNRRGSRWSGGMTFAGRRAPFNPLQRYIFI	PRS	0.983865	0.846652	0.915259
HLA-A1101	LTNWRTTSK	GFHTPLLISFSKLWERTVPTVTTSHCPRKY	KLIRQHGIYYIVGPC	0.911281	0.918825	0.915053
HLA-A1101	DTIQPPVPVPK	MMRRLLAQHATSECPKRTQPCTYCTKEFVF	AACCLPQPMWCGHCGSGGPARPSEGQL	0.967141	0.862763	0.914952
HLA-A2402	EYVAWSAHL	EMRTEDERVTNHEDGSPVNEPNETTPLTEP	CSNGKLPLKEEDGKEALNPETIEIKVSNDI	0.948316	0.881217	0.914767
HLA-A0201	RVIGKTTEL	ASKLLGQNWVQNAFDGSCNFFRWLEHLRLL	ATF	0.854153	0.975355	0.914754
HLA-A0301	RSIFSGIGK	GKRKTEPSAWSQDTGDANTNGKDWGRSWSD	KC	0.846928	0.982437	0.914682
HLA-A0301	RAWTPSLCQK	DIEIATYRKLLEGEENRITIPVQTFSNLQI	ATSRGTSW	0.957442	0.871908	0.914675
HLA-A0201	SMPPKPNIIKV	LEHLQWTMGYEVQITAANRLGYSEPTVYEF	IGLGVAALLLILVVTDVSCFFIRQCGLLMC	0.95332	0.874599	0.913959
HLA-A0201	KLADNLKLFRL	DEIEAALSNLEVTLEGGKADSLLEDITDIP	RSCARCKCSRKKIWNQVTNPCCRWYE	0.998664	0.828553	0.913608
HLA-A0101	GSDDLLKY	LATNIPKGCAETAVRVHVSYLDGKGNLAPQ	YHQVTRAVLGDDPQLMKVALQDLQTNSKIG	0.99989	0.827271	0.913581
HLA-A1101	STTHHVNLAK	YTGKHITYIMRFSRNFYCFVSIFIYKRKLC	WIVRLINRYIKYKTISYGLSINKFGNVGLI	0.982348	0.843603	0.912976
HLA-A1101	TTQPVYNAPR	YFPTEVTPHAFTPSSRQQDLVSTVNVVYSQ	ACFQGPLLIPPLRFLIMRLVKFQKITFQFN	0.952775	0.872976	0.912875
HLA-A0101	FLYDTDRGYY	GESQFVLQLRPSLRGALLSLLDHYEWNCFV	RGYR	0.917044	0.908438	0.912741
HLA-A1101	ASFPLPSSY	IVMEGYLFKRASNAFKTWNRKKPDHIRYQM	SSFLFGTRKLIINLHSSWITCNG	0.932723	0.89165	0.912187
HLA-A0201	SLQDAEIARL	FHKYSGREGDKHTLSKKELKELIQKELTIG	MEDLDRNKDQEVNFQEYVTFLGALALIYNE	0.987943	0.834286	0.911115
HLA-A2402	KFQDGLHQL	DNKLNVEDVDSTKNRKLIDDYDSTKSGLDH	DGTPLTAEDIVHKIAARIYEENDRAVFDKI	0.938439	0.883309	0.910874
HLA-A0201	NLDEAEGIFL	GENGKNARDPRLSKREESIAKIGKKKYQKI	SLFPKLRATEQMTNVGC	0.973132	0.84833	0.910731
HLA-A0301	RLPPVSLVRTR	SAKMLMFVNISPLEENVSESLNSLRFASKV	GWL	0.961684	0.858836	0.91026
HLA-A2402	SFPSIHSSYSF	DFFYRCFPDGVMNSEMHCTGDPDLVSEGRK	VGGVIGLIFAYICYRQHYPPLANTACHKPY	0.98525	0.834548	0.909899
HLA-A1101	LTFPAQLRR	GGDAWDTGLQARRGTAAGTSGAPNRSQLSS	IGVSGRKPGAGGRLGPGSRTCAPRCLPRAR	0.979854	0.839918	0.909886
HLA-A0301	LTNWRTTSK	GFHTPLLISFSKLWERTVPTVTTSHCPRKY	KLIRQHGIYYIVGPC	0.903922	0.91553	0.909726
HLA-A0301	ISYGLSINK	YKRKLCSTTHHVNLAKWIVRLINRYIKYKT	FGNVGLIDIHPNCI	0.995251	0.823895	0.909573
HLA-A1101	ETSEAVWLR	SISTALAFLSLGAHNTTLTEILKGLKFNLT	GLCH	0.876745	0.941949	0.909347
HLA-A0201	TIDYTVPTV	FPRSIDVKYIGVKSAYVSYDVQKRTIYLNI	IAEEMSYMYDFCTLISIKVHNIVLMMQVTV	0.975103	0.843359	0.909231
HLA-A0301	QIIKLLPSK	TPGFMYKNLQCLVIDEADRILDVGFEEELK		0.900134	0.915724	0.907929
HLA-A0201	FLAHPSRTEV	PPPLMIKQEPRDFAYDSVPSCHSIYMRQEG	KLSTTEIPCKYRSE	0.882788	0.932685	0.907737
HLA-A1101	ASLKIHLLLK	SKLNEVEQLLYYLQNRRDSLSGKGKKKKNQ	EWRLMKLLTLMTWMNILSYYMKIFLTKFGV	0.995691	0.819757	0.907724
HLA-A0301	RLINRYIKYK	RNFYCFVSIFIYKRKLCSTTHHVNLAKWIV	TISYGLSINKFGNVGLIDIHPNCI	0.989076	0.826134	0.907605
HLA-A0301	SSFLFGTRK	RASNAFKTWNRKKPDHIRYQMASFPLPSSY	LIINLHSSWITCNG	0.849295	0.965663	0.907479
HLA-A1101	RVSGAVTVR	LSLEPASLEGGRRVPGRAPENCAVAFSAET	PASRFISDAG	0.872031	0.942147	0.907089
HLA-A0301	ALWTGTAPPR	YTPAMRMTSTDYSLSATTHWHVGGLPPARP	YRAPDSPAPTHCPLI	0.932987	0.881105	0.907046
HLA-A0301	QVILPPWSPK	EEPWKENISCSSTTFIKSTICLKMGCPGWP	AQRLQV	0.996574	0.816211	0.906393
HLA-A1101	TQTDPKMLSK	IKSKEEESVHVTQRKTHYSMDSLSSWYMTV	KRTTSSQWQSPPVVVILKDMESFATKVLQD	0.934441	0.877704	0.906073
HLA-A1101	ASSPAMTHR	VTYTLLRKHRHQTKKSNLRSLADIGKTVSS	NLTSSSLNDISDKPEKDQLKNKFMKKLPRD	0.873401	0.938565	0.905983
HLA-A2402	SYVPNADVLF	GTRLVGEDAPKNKDLVEWLKLHPTYTVDMP	SSFQKPKQKRHRCRNPNKLDINTLTGEERV	0.998694	0.813074	0.905884
HLA-A2402	LYPVHMLGQF	ILHLLSQLKLGMDLTRVSLVCWSMEKSTHF		0.938101	0.873454	0.905777
HLA-A1101	ALIPGTAAR	AAGDTRGRPWDPARHPTRTRCPRRLRAAER	RRLHAVPVHGHVGLRGAGGVTGPLPGHGLQ	0.846787	0.96464	0.905713
HLA-A2402	SYSQWAEFILF	ANKMSIAWQLPQYALVTAGEVMFSVTGLEF	SCLLLVICLIFSIMGYYYVPVKTEDMRGPA	0.999735	0.810854	0.905294
HLA-A0301	SSFQEFLQR	REVKKRELVFLQFRLNKSSEDFSAIDYLLF	QVWLTTLTRGQLPKKVLNCFLWSLNGKILS	0.907185	0.902864	0.905024
HLA-A0201	FLFGTRKLII	SNAFKTWNRKKPDHIRYQMASFPLPSSYSS	NLHSSWITCNG	0.978125	0.831836	0.904981
HLA-A1101	GADAPSVSK	PSSLIQANVTVGTCSGFCSQKGSRAKRTTG	PTRVAGGRLRCLIQPSC	0.955385	0.854444	0.904914
HLA-A0201	FLPIQTQKL	TGSHHTRSSSAMTVGPGGEVGTTAVGWTQY	QC	0.832147	0.977613	0.90488
HLA-A1101	KVYQGEEAAR	MAGKLPG	SGIERRDGGDNARLELSGCSLGSRRPAWDR	0.963564	0.846088	0.904826
HLA-A0201	FLLESTMNEL	MWNYMYSKQPSVFVKSTEEGIARVLNSNYA	GFPGRV	0.95984	0.848896	0.904368
HLA-A2402	CYNLPFRLL	HPLTLLLVKCYLLQLSSYFMRPQLLLVLKY	MLTPCLKLFFQLCPVIQYWLKPPKLIKLVL	0.961549	0.84611	0.903829
HLA-A0201	SLNELHTNV	SQTPGLQRSSCPGLPKCWDYRGEPPCPGFI		0.867393	0.940224	0.903809
HLA-A0101	LWDIAGALHLY	SFSKHYKSTVGVDFALKVLQWSDYEIVRLQ	DTIVLSGCLCLCYYV	0.984875	0.82256	0.903718
HLA-A2402	KYKTISYGL	SIFIYKRKLCSTTHHVNLAKWIVRLINRYI	SINKFGNVGLIDIHPNCI	0.985524	0.821836	0.90368
HLA-A2402	FYFNGCFHW	LISGGFRSIVEHVASKLNIPATNVFANRLK	IWRKCDQATSQG	0.90653	0.900597	0.903564
HLA-A1101	STQVPGLHLR	LSSPPGDLRPARQQLPPPPPDGLWPAVSGG	PPARRPLYPGH	0.987596	0.819445	0.903521
HLA-A0201	KMLIIVVSA	DFIHMIQMLYYVKDIPATLKFFHSLLGTNA	VAGTSCGKSTDHAFPRMTSASISHQMTSLR	0.88643	0.92035	0.90339
HLA-A1101	LVMSPVSVYK	WKKDHISRAFAGASQTHTLTSECPIPAFPH	VESNYLSLL	0.997394	0.808694	0.903044
HLA-A1101	AALGPNTESAK	MTQALVSTAWTSMWCWVGQVSASQTRSAGQ	RRPCAGSSRSMMGSSFLAN	0.988938	0.816617	0.902778
HLA-A0301	RLLRDPGTLR	AVPVHGHVGLRGAGGVTGPLPGHGLQLPVR	AHPPLRQA	0.987694	0.817468	0.902581
HLA-A1101	ASTTWTTAR	ACSHAAMADSAWTWATPCAAAAAPASRVLA	AAPALTAARVWRAAARTAAPARWASAAATA	0.926409	0.878615	0.902512
HLA-A0101	DSSGVVFLY	MAQLFLPLLAALVLAQAPAALADVLEG	REGSARYAFSFSGAQEACARIGAHIATPEQ	0.896863	0.908079	0.902471
HLA-A2402	IYMMEPGVL	SDSRLEASSSQSFGLGPHRGRLNIQAWRTA	RSRTPIHGFRWTLGTPPASRVLSHRAGTLS	0.828771	0.975169	0.90197
HLA-A1101	LSQGFLHLK	ADAESLLSLCKEGSYLVRLSETNPQDCSLS	FARTRENQVVLGQHSGPFPSVPELVLHYSS	0.968253	0.835238	0.901745
HLA-A2402	AYNFYGFLIF	QYHPVVHPLDLKYDPDPGESVSICGKNEAS	F	0.99049	0.812915	0.901702
HLA-A0101	SEELGYRY	MDASTRPTILLLPGLTGTSKESYILHMIHL	Q	0.979203	0.820768	0.899985
HLA-A0301	GIFLSLFPK	ARDPRLSKREESIAKIGKKKYQKINLDEAE	LRATEQMTNVGC	0.991828	0.807987	0.899907
HLA-A2402	GYRELFPLL	ILVYSNCRKTYIVNDRPPCFQFCDREERHW	QWAPEGKVGGQLTLGEMIGWRREQRYLYLG	0.980748	0.818449	0.899599
HLA-A2402	MFLLPKQNHLW		VFPEKPVPAPKASWLEETRPNPFAALTGGS	0.998521	0.800527	0.899524
HLA-A0301	RLFHHSLLL	SVVIPVTGDSEGATVQVKFSELLWGGKGHR	RMSSLLSNALLPADTS	0.954448	0.844127	0.899287
HLA-A0301	ASFPLPSSY	IVMEGYLFKRASNAFKTWNRKKPDHIRYQM	SSFLFGTRKLIINLHSSWITCNG	0.945252	0.853251	0.899251
HLA-A0201	ITIDYTVPTV	LFPRSIDVKYIGVKSAYVSYDVQKRTIYLN	IAEEMSYMYDFCTLISIKVHNIVLMMQVTV	0.933985	0.863466	0.898726
HLA-A1101	SVTPWIDLR	AWHDVRVTRNLRQDEKKTKTKTKTEELPLS	VLHPQEKQASMTPPMLLGNPFLLPPNEIGS	0.948043	0.849068	0.898556
HLA-A0301	HQYSIQNWK	VLVLSWYPPGMADDNGEPSDDLVPAILDTA	AV	0.937034	0.858596	0.897815
HLA-A2402	QYFLPIQTQKL	GMTGSHHTRSSSAMTVGPGGEVGTTAVGWT	QC	0.99016	0.80539	0.897775
HLA-A1101	MTVTQTDPK	CVDIKSKEEESVHVTQRKTHYSMDSLSSWY	MLSKKRTTSSQWQSPPVVVILKDMESFATK	0.88216	0.910922	0.896541
HLA-A0301	ALLPHLRKH	GVERAGPEQELTRLLEFYDATAHFAKGLEM	SFLPVL	0.923799	0.868912	0.896356
HLA-A0301	SVFPLQERK	TGKAEGAGFATTQTPLWLLGEVEAPRGGRL	RGRDEELFL	0.968234	0.823936	0.896085
HLA-A1101	ALNQPKNNFK	FSTLFAFFFCGGGVGRRGCPRENKTHCFNL	CKCFRVSVGEIVTRNQQMSGKENSLTEIWL	0.977749	0.814158	0.895953
HLA-A1101	KSTDHAFPR	ATLKFFHSLLGTNAKMLIIVVSAVAGTSCG	MTSASISHQMTSLRCWTT	0.948907	0.842516	0.895712
HLA-A1101	KVVITLVRK	CIVLMATVLKTIVLIPFLEQNNFSPNTRTQ	EELGKRVCWPVLRRTPVCFL	0.988936	0.800366	0.894651
HLA-A0301	RVSVGEIVTR	GRRGCPRENKTHCFNLALNQPKNNFKCKCF	NQQMSGKENSLTEIWLMIQKNSFKI	0.967147	0.821371	0.894259
HLA-A0301	KVVKLLSNK	PDEEHRLEDAETESQSAVSETPQKRSDAVQ	RSQAVGILMSSLHLDMKDIQHAVVNLDNSV	0.922302	0.865032	0.893667
HLA-A0201	IILTQLLRV	AHSEAKTSGLLWAGLALLSIQGGALAWLTW	GNFFSSSTRNQSNSTLMCSNTTS	0.973175	0.814148	0.893661
HLA-A1101	SLSQGFLHLK	RADAESLLSLCKEGSYLVRLSETNPQDCSL	FARTRENQVVLGQHSGPFPSVPELVLHYSS	0.982637	0.804205	0.893421
HLA-A1101	TTDQVPRQK	MASGRRGWDSSHEDDLPVYLARPG	YGGMFCNVEGAFESKT	0.975487	0.811044	0.893266
HLA-A2402	TYVPSADDVQV	ELLARRTYYSGDLLFSVDILRNVTDTFKRA	SPGSVHLLRVVEDFIHLVGDALKAFQSSLI	0.964699	0.821807	0.893253
HLA-A1101	AVSEMELVSR	SADAVCFDVDSTVIREEGIDELAKICGVED	LQERNVQVFLISGGFRSIVEHVASKLNIPA	0.988239	0.796895	0.892567
HLA-A1101	RLFPLRPPLR	FSVVSGLEQNPLAAGFRLSPPCLPLSSQAE	GLHIGLLQICSFCRPFSLS	0.899995	0.885137	0.892566
HLA-A2402	VYKVESNYL	RAFAGASQTHTLTSECPIPAFPHLVMSPVS	SLL	0.99001	0.794493	0.892252
HLA-A0201	ILAPARPSISL	TMEEFKDFNKYVAYIESQGAHRAGLAKVGD	RRGPADILGPSSASPTGVACARGMCFGATP	0.948552	0.835926	0.892239
HLA-A1101	KVVKLLSNK	PDEEHRLEDAETESQSAVSETPQKRSDAVQ	RSQAVGILMSSLHLDMKDIQHAVVNLDNSV	0.907704	0.876482	0.892093
HLA-A1101	GTLRVQLGR	EENPAWLPLYGSVCCRLAAQPLCMTQPTAS	CRTGHKCMEF	0.888673	0.894926	0.8918
HLA-A2402	VWPTFAQRL	RAGDVEEDASQLIFPKACYSRKSFISLSWP	LRSPRL	0.939338	0.844215	0.891777
HLA-A0201	MLQDLSASV		FFPPCSQHRTLGT	0.912935	0.869347	0.891141
HLA-A2402	RYQDRIHCV	LCDTMGLDGAEGAGLCMDDIPHILKGCMPD	AYVLDINSIDNLYSKMLAKVKQVHKEVLNC	0.89923	0.882185	0.890707
HLA-A0101	EGDSSGVVFLY	MAQLFLPLLAALVLAQAPAALADVL	REGSARYAFSFSGAQEACARIGAHIATPEQ	0.995567	0.784864	0.890215
HLA-A0101	GSDDLLKYY	LATNIPKGCAETAVRVHVSYLDGKGNLAPQ	HQVTRAVLGDDPQLMKVALQDLQTNSKIGA	0.999764	0.780121	0.889943
HLA-A0201	GIMDAANFFL	APVKKLVVKGGKKKKQVLKFTLDCTHPVED	QERIKVNGKAGNLGGGVVTIERSKSKITVT	0.964715	0.81483	0.889773
HLA-A1101	ASCHSGPLK	RTAPGRLHLLVLQAAQAIVESPPGVQNGAS	SPM	0.925053	0.854251	0.889652
HLA-A0301	LLRDPGTLR	VPVHGHVGLRGAGGVTGPLPGHGLQLPVRR	AHPPLRQA	0.842761	0.935602	0.889181
HLA-A1101	GIAGAVLPR	DNNFTEWASLFRHYSPPPFGLLGTAPAYSF	PLVACYAQP	0.975725	0.802099	0.888912
HLA-A1101	TTASPVAMWR	SWQMVWWGWMTLGRVRSCGSGQAMTMWDGA	WSLSLTG	0.87867	0.897978	0.888324
HLA-A2402	CFPKPGVSLW	GWGVGRSGGSGVQGHPQQGFPSFHHQRLAS	LPSHGAVAAHRGLPWGACCSSSWFCCCCSA	0.898701	0.877075	0.887888
HLA-A0301	LVMSPVSVYK	WKKDHISRAFAGASQTHTLTSECPIPAFPH	VESNYLSLL	0.995242	0.779376	0.887309
HLA-A1101	SAAKVLTRR	AHVDQRSREVLQMWSVLQDGPISRVIVFSL	GNPSTLGGRSGRIT	0.840348	0.933883	0.887115
HLA-A0301	SLKIHLLLK	KLNEVEQLLYYLQNRRDSLSGKGKKKKNQA	EWRLMKLLTLMTWMNILSYYMKIFLTKFGV	0.994412	0.779416	0.886914
HLA-A0201	MLLGNPFLL	TEELPLSSVTPWIDLRVLHPQEKQASMTPP	PPNEIGSHSCQSFDSLGVMPTLLPA	0.933351	0.840095	0.886723
HLA-A1101	GQSAFADFGK	STFQFEIWENLDGNFSVSTILEKPQNMMVV	IW	0.885527	0.887313	0.88642
HLA-A0301	SVVGNVLVR	CSQGSGILHYAHGDSQQTHLLKQEAPWALV	KRTHRVLVLKSRDRALI	0.895372	0.876078	0.885725
HLA-A0301	QTQKGTVLK	MEENMEEG	AFICN	0.855721	0.914531	0.885126
HLA-A2402	HFLYPVHML	SVILHLLSQLKLGMDLTRVSLVCWSMEKST	GQF	0.847961	0.921255	0.884608
HLA-A0201	IMSAVPFLI	LAFMLVEGNFVLFCTYTLGFRNEFQNLLLA	LVALMESNLIITYAVAVAAGISVAAAFLLP	0.870626	0.897528	0.884077
HLA-A2402	SYFMRPQLLL	TLRLNLCLVQTQSQHPLTLLLVKCYLLQLS	VLKYCYNLPFRLLMLTPCLKLFFQLCPVIQ	0.951646	0.8161	0.883873
HLA-A1101	FVQDTCMPK	AAAAELQASGGPRHPVCLLVLGMAGSGKTT	ALHRM	0.898419	0.869052	0.883735
HLA-A0101	LTDQTGNLL	ICEKTVLKRVLKELWKLVMNTMEKTIVLPP	RKHGKGLEKGRVKLPSHSDGTQMIFNAAKE	0.973369	0.7936	0.883485
HLA-A1101	GSYPSSAIYR	EDNGILLYNGDNDHIAVELYQGHVRVSYDP	W	0.930634	0.835997	0.883316
HLA-A2402	HFSTLFAFF	NEVETNADTFCLYGVFLFLFFFSFSLFFFF	FCGGGVGRRGCPRENKTHCFNLALNQPKNN	0.86534	0.901277	0.883308
HLA-A1101	RAAPALTAAR	DSAWTWATPCAAAAAPASRVLAASTTWTTA	VWRAAARTAAPARWASAAATAASARTRAPR	0.855528	0.91097	0.883249
HLA-A0301	LLLSWIKTRK	VMPYVDILFGNETEAATFAREQGFEKVKSL	KLLIPMELEMHLLEVFCLNWSLTSL	0.997223	0.768281	0.882752
HLA-A0201	AVVPALPGL	LEGARPPPERVLALSFRAPQVQSCTPRARE	PHGARPPSRGLGAARPR	0.889951	0.87443	0.88219
HLA-A2402	RFSRNFYCF	DWANGYYRQQRKLVEEIGWSYTGKHITYIM	VSIFIYKRKLCSTTHHVNLAKWIVRLINRY	0.974769	0.789299	0.882034
HLA-A1101	TTHHVNLAK	TGKHITYIMRFSRNFYCFVSIFIYKRKLCS	WIVRLINRYIKYKTISYGLSINKFGNVGLI	0.919368	0.84427	0.881819
HLA-A0301	ASWPTSARK	SQAKKMLPITMPEGTTPLARRSLTSCWTEF	SKLEFSIYPAPQVSTAV	0.840326	0.923091	0.881708
HLA-A0301	KVYQGEEAAR	MAGKLPG	SGIERRDGGDNARLELSGCSLGSRRPAWDR	0.940451	0.821632	0.881041
HLA-A0201	TLTPKQPAL	HLKSEKPQTKLLILHQAVAVILSLEQQVRG	REGKKKKFLPYRQSRQPHCQEPILGLVKLP	0.983511	0.777619	0.880565
HLA-A0301	AGFPGPTLR	LASVLLLLLWAPALSLLAGSRSHRLPLLLR	AGHR	0.865851	0.895062	0.880456
HLA-A0301	GQADTVKVPK	GLGNPMAVVSKQVNMELAKIKQKCPLYEAN	EKDEMVEQEFNRLLEATSYLSHQLDFNVLN	0.809967	0.95092	0.880443
HLA-A2402	SFPLPSSYSSF	VMEGYLFKRASNAFKTWNRKKPDHIRYQMA	LFGTRKLIINLHSSWITCNG	0.993154	0.767454	0.880304
HLA-A2402	DYILTLNLL	IGPKHWPTSRFAHVMKLRQAALRTAREKWS	IAENKTIVAPMLESRGLYSNFWCGITPKGF	0.997677	0.762768	0.880223
HLA-A2402	RYIKYKTISY	CFVSIFIYKRKLCSTTHHVNLAKWIVRLIN	GLSINKFGNVGLIDIHPNCI	0.99401	0.76578	0.879895
HLA-A1101	STTEIPCKY	FAYDSVPSCHSIYMRQEGFLAHPSRTEVKL	RSE	0.82768	0.932084	0.879882
HLA-A2402	YFMRPQLLL	LRLNLCLVQTQSQHPLTLLLVKCYLLQLSS	VLKYCYNLPFRLLMLTPCLKLFFQLCPVIQ	0.894359	0.864328	0.879343
HLA-A1101	RDIGYILLK	YGHRQYLECEVFRVEGIKDNLDDIKRIIKA	MEKMENLCHLCCVTLWG	0.975071	0.783574	0.879323
HLA-A0201	YLPGVCHL	AVGVREGRVQWISMAFESVSPGSLTGCHAA		0.983433	0.774964	0.879199
HLA-A2402	RWLEHLRLL	VAGENLLNAASKLLGQNWVQNAFDGSCNFF	RVIGKTTELATF	0.914038	0.844265	0.879152
HLA-A2402	SLPSRLPRF	APESEGPCTGARDAVKVLPFFHVNTIASRF	PFSQPS	0.938194	0.819121	0.878657
HLA-A1101	TILGTGVEK	GVACARGMCFGATPSSFTSACLWSSNNVPG	WPVQALAPGSWQGVVRTHSHTAVKPRGSGP	0.959186	0.797957	0.878572
HLA-A1101	RIWPASAHPR	AGTPSRAPATSTFPHEGAGRRQRPSAGCTA	NRTSSTTGTGSTSGSDSTTGPSKATSCGRM	0.789633	0.966991	0.878312
HLA-A2402	SYVPNADVL	GTRLVGEDAPKNKDLVEWLKLHPTYTVDMP	FSSFQKPKQKRHRCRNPNKLDINTLTGEER	0.998249	0.756177	0.877213
HLA-A0301	SLNLNVPAGK	KMSPHSLTCVTSSHWDRPYSREVAAFPLVS	AWASSYPDGCTLLAS	0.994237	0.759665	0.876951
HLA-A0301	STFPHEGAGR	YVCLAMGGTCAMLASASATPAGTPSRAPAT	RQRPSAGCTARIWPASAHPRNRTSSTTGTG	0.871542	0.882219	0.87688
HLA-A0201	VIPPEGSLLQV	KKDLRASYCLIDSFLGDSELIGDLTQCVDC	PHRLLTLTLLPSLELCLLCGPSPPLSQLYP	0.965059	0.788607	0.876833
HLA-A0301	LLAPQTLPSK	VICFCLLGITCAIPVKQADSGSSEEKQKQN	SNESHDHMDDMDDEDDDDHVDSQDSIDSND	0.994491	0.756782	0.875636
HLA-A0201	VLNRALTFV	EYGIMVNNDAVVRNVYHKYFHPKEALVSSG	YPFGATLSVMKPAVAVLSTGSVCFPLNRPI	0.809558	0.941037	0.875298
HLA-A0301	SLSQGFLHLK	RADAESLLSLCKEGSYLVRLSETNPQDCSL	FARTRENQVVLGQHSGPFPSVPELVLHYSS	0.96976	0.780233	0.874996
HLA-A0201	FVFSVETVSL	LPPPRFDRFSCLSLLSSWDYRCVPPCLANF	CWPGWSQTPDLVIRPPRPPGVLGLQA	0.956778	0.79313	0.874954
HLA-A0201	ILQPFQVAEV	AVDPLDSTSRIMDPNIVGSEHYDVARGVQK	FTGHMGKLVPLKETIKGFQQILAGEYDHLP	0.964833	0.784908	0.87487
HLA-A1101	KVFSYTADK	QIPRRYYSLGEIRNVETNQCLDNMGRKENE	EIRTDDLCLDVSRLNGPVIMLKCHHMRGNQ	0.968581	0.781042	0.874811
HLA-A1101	GVMGLGLRVGR	MLRAGAPTGDLPRAGEVHT	GVEEMQRPGDPGSARGEVNAETNGSAGRSP	0.99163	0.756446	0.874038
HLA-A2402	MYQYHTEQHW	PAGCAAHSAVAMGKHVYIFGGMTPAGALDT	TLLKFDTLLPPGRLDHSMCIIPWPVTCASE	0.923159	0.824898	0.874029
HLA-A1101	SLNGKILSSR	SFQEFLQRQVWLTTLTRGQLPKKVLNCFLW	KSKI	0.923797	0.824228	0.874012
HLA-A0301	KVVITLVRK	CIVLMATVLKTIVLIPFLEQNNFSPNTRTQ	EELGKRVCWPVLRRTPVCFL	0.969582	0.777934	0.873758
HLA-A1101	GTVGGRHRLPK	GKSHSPLSPHVPTVHSTDACWVPAGCWLWG	LREFTFQL	0.994171	0.75295	0.87356
HLA-A1101	GTSGISGTSIK	EENKGHQMLAGAAQAASVRRSKGSRTPSRA	AWAWLWMTPMRTTAGTRATPSSPA	0.951923	0.794582	0.873253
HLA-A1101	ALWTGTAPPR	YTPAMRMTSTDYSLSATTHWHVGGLPPARP	YRAPDSPAPTHCPLI	0.915721	0.830414	0.873068
HLA-A0301	FLYDTDRGYYR	GESQFVLQLRPSLRGALLSLLDHYEWNCFV	GYR	0.983278	0.762354	0.872816
HLA-A1101	KTITAEDFRK	KEMEQIVEEEEKFKKQWEEDWGSKEQLLLP	YEEGFDPYSMFTPEQIMGKDVRLLRIKKEG	0.992499	0.752156	0.872327
HLA-A1101	AVSGELSRR	QVPPGWKQWAREFSEQLSSSRGDGRRVECF	LGSAGGADRHGCAGGNSTGADQPRPV	0.836326	0.908139	0.872232
HLA-A2402	LYGVFLFLF	QQQLLHSKFLAGFVCHIEKNEVETNADTFC	FFSFSLFFFFHFSTLFAFFFCGGGVGRRGC	0.99933	0.745084	0.872207
HLA-A1101	AVSGELSRR	QVPPGWKQWAREFSEQLSSSRGDGRRVECF	LGSAGGADRHGCAGGNSTGADQPRAVHHQR	0.836027	0.908139	0.872083
HLA-A1101	ATMVGHAWRR	PAGTSVQAQPVLPTDSASRGGVAVVPASAP	RKGSAAYVCLAMGGTCAMLASASATPAGTP	0.984114	0.757996	0.871055
HLA-A0301	KVFSYTADK	QIPRRYYSLGEIRNVETNQCLDNMGRKENE	EIRTDDLCLDVSRLNGPVIMLKCHHMRGNQ	0.983766	0.757337	0.870551
HLA-A0301	RLLRVIGK	LNAASKLLGQNWVQNAFDGSCNFFRWLEHL	TTELATF	0.996663	0.743898	0.870281
HLA-A2402	TYNWKGFSI	QGHEQFGFCQQGTAAAFSPDSHYLLFGAPG	DSGKGLVRAEELSFVAGAPRANHKGAVVIL	0.988756	0.751357	0.870057
HLA-A0301	RLKTFLRIYY	HVNFYVEYGVAGSKKQFHYPIFNLGDAFFK	GSS	0.867212	0.871534	0.869373
HLA-A1101	SLLLPSFHLR	PEPGEDPRVTRAKYFIRDEFLDQHCQWRWA	CGH	0.961887	0.776626	0.869257
HLA-A1101	STMNELGFPGR	MYSKQPSVFVKSTEEGIARVLNSNYAFLLE	V	0.837914	0.899853	0.868884
HLA-A0201	GLLKSRILV	TWNLASPLLSVSVDGTQRTVQVSVVRISLE	STCVANT	0.961926	0.775338	0.868632
HLA-A1101	SQLPNSFIMR	GKSGEPAGSPAAEWFGTPRSRTSPSPSSAA	S	0.884236	0.851997	0.868116
HLA-A1101	RAWTPSLCQK	DIEIATYRKLLEGEENRITIPVQTFSNLQI	ATSRGTSW	0.856242	0.879891	0.868066
HLA-A0101	YQDRIHCVAY	CDTMGLDGAEGAGLCMDDIPHILKGCMPDR	VLDINSIDNLYSKMLAKVKQVHKEVLNCGI	0.926983	0.808806	0.867895
HLA-A0201	KLADQCTEVQA	TGKEDAANNYARGHYTIGKEIIDLVLDRIR	GVLYLPGAPGFHSCS	0.840355	0.894689	0.867522
HLA-A1101	SSLTFPAQLR	GGGGDAWDTGLQARRGTAAGTSGAPNRSQL	RIGVSGRKPGAGGRLGPGSRTCAPRCLPRA	0.936304	0.798559	0.867432
HLA-A1101	SQKAADPWVLK	WSQEKLQLVERLQGEKQQVEQQVKELQNRL	HSELEKQDNSWKETRSEKIHDKEAVSEVEL	0.903188	0.831112	0.86715
HLA-A0201	FLFGTRKLI	SNAFKTWNRKKPDHIRYQMASFPLPSSYSS	INLHSSWITCNG	0.935217	0.798472	0.866844
HLA-A0201	SAWYHVLKV	ALLAKPKVTKYCLICVKDSYTDFHIDSGGA	DKCYKCIVKQGQTLFIPSGWIYATLTPVDC	0.807227	0.925995	0.866611
HLA-A1101	KVLSREYRK	GCGLLQKREQSRGTLGCYAGLQWCSQPRSR	IKFVLDLELARSFGGEGIEPI	0.895664	0.837184	0.866424
HLA-A0301	LMAEKNVEK	EVGWKYQAVTATLEEKRKEKAKIHYRKKKQ	KIDKYTEVLKTHGLLV	0.909419	0.822251	0.865835
HLA-A0201	KLLEIPAL	GAEHLWLTRHLRDPFVKAAKVESYRCRSAF	LLASCLG	0.999834	0.731746	0.86579
HLA-A1101	RSSCPGLPK	GTLNGRTGWFPSNYVREIKSSGWSQTPGLQ	CWDYRGEPPCPGFISLNELHTNV	0.921112	0.809875	0.865493
HLA-A2402	RWASLLLPSF	DATPEPGEDPRVTRAKYFIRDEFLDQHCQW	HLRCGH	0.995021	0.734647	0.864834
HLA-A0201	FVFDTIQPPV	GARMMRRLLAQHATSECPKRTQPCTYCTKE	PVPKAACCLPQPMWCGHCGSGGPARPSEGQ	0.97403	0.755196	0.864613
HLA-A1101	TTHERVVQR	VEESYAMPTKTIEVLQLQDQGSKMLLDSVL	FECYVCRNFLGNNPKQSS	0.889923	0.83862	0.864271
HLA-A2402	FYFNGCFHWI	LISGGFRSIVEHVASKLNIPATNVFANRLK	WRKCDQATSQG	0.971923	0.756289	0.864106
HLA-A0101	LSHPSSWDY	RSRSVAQARVQWSDLSSLQAPPPGFTPFSC	RCPPPHPANFFVFLVEMGFHCVSQDGLDLL	0.888386	0.839818	0.864102
HLA-A1101	GVAHIISTR	PEKPLFSSASPQDSSPRLSTFPQHHHPGIP	TPPPPSPLPFPTQAILPPAPSSYFSHPTIR	0.90663	0.820624	0.863627
HLA-A2402	LYLGDRASHL	FPLLQWAPEGKVGGQLTLGEMIGWRREQRY	GRVGSAPPSHPPSSVWTIEPHPAPRTAPGR	0.850298	0.87439	0.862344
HLA-A2402	RIIAAYVHF	LEARFADLSHNRPTGGRSVLWMRPIALEMC	TLISRGI	0.900776	0.823475	0.862125
HLA-A0201	SLLPATLNA	DRLPQSGGEPGPVGEQQPAHPPPSDPSWPH	CPGRREQLLNLPVNCPFPRPSPGLPAECHS	0.934065	0.789789	0.861927
HLA-A0301	STMGAWVSTEK	QNSSSSASSEASETCQSVSECSSPTSVSSG	RRKEKREPDPNGGGPTTASGPPAAAEEAQR	0.746909	0.976664	0.861786
HLA-A0101	FSGPSPGYGY	AGVVIKQEQTDFAYDSDVTGCASMYLHTEG	EKPLRPFPDDVCVVPEKFEGDIKQEGVGAF	0.947234	0.774915	0.861075
HLA-A2402	SYTGKHITY	ACIQLLCVCRLDWANGYYRQQRKLVEEIGW	IMRFSRNFYCFVSIFIYKRKLCSTTHHVNL	0.957179	0.764791	0.860985
HLA-A0201	FLFSVAVPTTI	SLLELRALQTLSLGGNQLQSIPAEIENLQS	CGVQ	0.986235	0.733759	0.859997
HLA-A2402	VYDITVGW	RLHPAEEGDFWAESSMLGLKITYFALMDGK	MPACRYLPRYPQSPLSHLIWFSDSRHQRAA	0.994327	0.725592	0.859959
HLA-A0201	GLWKSAVNL	HYSLFPLLFTAPEKKNLFLIGWKLSTCLAW	YSLSPPGR	0.836214	0.883222	0.859718
HLA-A1101	KVGSCVVLR	ISKNCTSDGWSETFPDFVDACGYSDPEDES	W	0.84894	0.868937	0.858939
HLA-A0201	IMQKIISV	VARRWGIQKNRPAMNYDKLSRSLRYYYEKG	HC	0.997546	0.720086	0.858816
HLA-A0201	HLLPTLPLVI	PFCVICLPDRHDFNIFVHIPYLIHKCSLLF	CT	0.865862	0.851592	0.858727
HLA-A2402	IYIECADHTL	RLRCEKEAVLQRCHCRMVHMPGNETICPPN	GPCCLPFPTSPSASSCLCPLFSSLSWILPS	0.939308	0.778112	0.85871
HLA-A0301	HTVPTGGLK	QIHLITRMFECDVCHKFMKTPEQLLEHKKC		0.747939	0.969156	0.858548
HLA-A1101	ASQLPNSFIMR	MGKSGEPAGSPAAEWFGTPRSRTSPSPSSA	S	0.977871	0.738634	0.858252
HLA-A0101	NADTFCLY	GRGDGGQQQLLHSKFLAGFVCHIEKNEVET	GVFLFLFFFSFSLFFFFHFSTLFAFFFCGG	0.99095	0.725327	0.858139
HLA-A0301	ALLNHPLPGQR	MGSQEVLGHAARLASSGLLLQTNA	GLPQSMSQWGHPARLEPDPQPAVANVSCAL	0.947478	0.766786	0.857132
HLA-A0201	GIIHTLATL	REKVIDFSKPFMTLGISILYRKPNGLVLMS	TQTWWKTILPC	0.908458	0.805804	0.857131
HLA-A0201	HLALPPLPTV	AKPTNTQGKPLCPWAPPGSPYLYWGREKPS	AYSALLSSQGGSSCALSSSLLLLALF	0.885511	0.8274	0.856455
HLA-A2402	SYKKKLWIW	RYKVQNNLYHHCVINKLLSHGVPLPNWLIN	CQNMWMLYWEKDINTSELSFHCPQQPQWCG	0.990727	0.721329	0.856028
HLA-A1101	ATESTISFVR	FSRLGGDEDGYEEEEDENSRQSVGKSPRSR	FWNCANSVPFHG	0.892291	0.819232	0.855761
HLA-A1101	QNARVIVFK	APKSVLGKVKIFEKMDHKARLQRMQELQEA	LHIINKSFK	0.852313	0.858956	0.855634
HLA-A0301	RTYRKKPMKK	YMLAELILSTWEGGYNLQCQDLTSAGEADI	DMQEPPAGKEVKNGFSKAYFTAANGVMNKK	0.997319	0.713221	0.85527
HLA-A0301	GIAGAVLPR	DNNFTEWASLFRHYSPPPFGLLGTAPAYSF	PLVACYAQP	0.977224	0.733193	0.855209
HLA-A0101	QTDPKMLSK	KSKEEESVHVTQRKTHYSMDSLSSWYMTVT	KRTTSSQWQSPPVVVILKDMESFATKVLQD	0.947368	0.762273	0.85482
HLA-A1101	QTDPKMLSKK	KSKEEESVHVTQRKTHYSMDSLSSWYMTVT	RTTSSQWQSPPVVVILKDMESFATKVLQDF	0.886607	0.822819	0.854713
HLA-A2402	SYSQWAEFI	ANKMSIAWQLPQYALVTAGEVMFSVTGLEF	LFSCLLLVICLIFSIMGYYYVPVKTEDMRG	0.969408	0.739825	0.854617
HLA-A0201	FLWSLNGKI	LFSSFQEFLQRQVWLTTLTRGQLPKKVLNC	LSSRKSKI	0.870453	0.838698	0.854575
HLA-A1101	KQIIKLLPSK	NTPGFMYKNLQCLVIDEADRILDVGFEEEL		0.876644	0.832346	0.854495
HLA-A1101	AAQNLTLPR	GWDGLRLNWTAADNAYEHFVIQVQEVNKVE	LIESPSMG	0.963174	0.744858	0.854016
HLA-A0301	RLKTFLRIY	HVNFYVEYGVAGSKKQFHYPIFNLGDAFFK	YGSS	0.938045	0.769783	0.853914
HLA-A0201	GLSPLTLLILV	KSTSSAMSGSHQDLSVIQPIVKDCKEVTHQ	SSHH	0.989011	0.717906	0.853458
HLA-A0301	FMRPQLLLVLK	RLNLCLVQTQSQHPLTLLLVKCYLLQLSSY	YCYNLPFRLLMLTPCLKLFFQLCPVIQYWL	0.880145	0.826244	0.853195
HLA-A0201	LLPTLPLVI	FCVICLPDRHDFNIFVHIPYLIHKCSLLFH	CT	0.878389	0.827589	0.852989
HLA-A2402	DYVLQGYSL	AQAPRHRPHEVEEATGALTLTRKCFRHLAL	LHQLDPYMKKLAAELDQLVIDSAVEKREME	0.883171	0.822386	0.852779
HLA-A2402	TFQKPEFVF	GFQTAIDIFEDRIRGIDIIKWMERYLRDVS	W	0.941999	0.763559	0.852779
HLA-A0101	NTEKPLGFY	REFFDSLNEAIMRLVAVIMCHRLATPLLLG	WRVAASTHHRSGDLFKFCHPTHHLQVPGRE	0.976742	0.728145	0.852444
HLA-A1101	ATMVGHAWRR	CRPSQCCPLTAPAEVEWPWSPHQVTVSPAP	RKGSAAYVCLAMGGTCAMLASASATPAGTP	0.975702	0.727582	0.851642
HLA-A0301	RNFLGNNPK	QLQDQGSKMLLDSVLTTHERVVQRFECYVC	QSS	0.768555	0.934115	0.851335
HLA-A2402	HYPIFNLGDAF	TYANISWEYEGPEHVNFYVEYGVAGSKKQF	FKRLKTFLRIYYGSS	0.974097	0.72846	0.851278
HLA-A0301	SLYQILLQVK	CLKLFFQLCPVIQYWLKPPKLIKLVLQCCI	TCCTLHLYQFLMCRLLLICTLLHFKV	0.995577	0.706569	0.851073
HLA-A2402	LLPKQNHLW	MF	VFPEKPVPAPKASWLEETRPNPFAALTGGS	0.887401	0.813397	0.850399
HLA-A1101	QVSEPSLENK	GAPAARPTPPTCYSRMRALSQEITRDFNLL	VQRRKKILLVILPPRGSCCRSIVEDHISAF	0.960455	0.739615	0.850035
HLA-A0201	LLAGAEAKL	ETRGDRKARKPLVEKKRRARINESLQELRL	ENAEVLELTVRRVQEREQLQAEASERFAAG	0.894235	0.805116	0.849675
HLA-A0201	LLAGAEAKL	ETRGDRKARKPLVEKKRRARINESLQELRL	ENAEVLELTVRRVQGVLRGRARARAAAGGS	0.89354	0.805116	0.849328
HLA-A2402	SFSPHFWCI	STMDLVKSKSMDAISSETDRRERCSGCIGC	KL	0.731988	0.965526	0.848757
HLA-A1101	GVMAAGLSR	IHDNFGIVEGLMSMPSLPPRRLWMAPPGNC	TSSLPLLALPRLWARSSLS	0.915699	0.781812	0.848755
HLA-A0301	RISLEGLLK	LNVTSTWNLASPLLSVSVDGTQRTVQVSVV	SRILVSTCVANT	0.99397	0.703416	0.848693
HLA-A1101	STDYSLSGK	GLFAWHRRRQKEKGRDLAPRVSYTPAMRMT	GHAPGLPPLPLHTHIPQEWLCL	0.841917	0.854858	0.848388
HLA-A0101	TTDSMIPKTF	QHARVLQYRELLDALPMDAYTHGCILHPEL	SQCHHGPHETGP	0.839552	0.856797	0.848175
HLA-A1101	LSSQGFLHLK	ADAESLLSLCKEGSYLVRLSETNPQDCSLS	FARTRENQVVLGQHSGPFPSVPELVLHYSS	0.912002	0.782716	0.847359
HLA-A1101	SVFETNIREY	TLLILGNVSEFQRVVEVLQDSVDFDIDVNA	NKAIRNYTRFDDWYLWVQMYKGTVSMPVFQ	0.803238	0.891065	0.847151
HLA-A0301	SQKAADPWVLK	WSQEKLQLVERLQGEKQQVEQQVKELQNRL	HSELEKQDNSWKETRSEKIHDKEAVSEVEL	0.85245	0.841447	0.846948
HLA-A0201	SIDPLRVAV	MASNFNDIVKQGYVRIRSRRLGV	RRFDCLSLEPASLEGGRRVPGRAPENCAVA	0.984233	0.709454	0.846843
HLA-A0301	RSLPSLVKR	LTTYKSEIKYSCQEPYYKMLNNNTECGQPS	IIGGRNAEPGLFPWQALIVVEDTSRVPNDK	0.808524	0.884473	0.846499
HLA-A0201	FLTKFGVLL	KIHLLLKEWRLMKLLTLMTWMNILSYYMKI		0.819651	0.873274	0.846462
HLA-A2402	NFYGFLIFF	HPVVHPLDLKYDPDPGESVSICGKNEASAY		0.733798	0.959076	0.846437
HLA-A0301	GTILGTGVEK	TGVACARGMCFGATPSSFTSACLWSSNNVP	WPVQALAPGSWQGVVRTHSHTAVKPRGSGP	0.840514	0.851434	0.845974
HLA-A1101	YMMEPGVLR	DSRLEASSSQSFGLGPHRGRLNIQAWRTAI	SRTPIHGFRWTLGTPPASRVLSHRAGTLSG	0.729968	0.961492	0.84573
HLA-A0101	FTEEEDSCEY	EPSYVEALHSCLQILIALLGFVCGCQVVSV	GASAGSGAGDGYRGGSSESVPSGARRETSP	0.8638	0.8276	0.8457
HLA-A0301	LTFPAQLRR	GGDAWDTGLQARRGTAAGTSGAPNRSQLSS	IGVSGRKPGAGGRLGPGSRTCAPRCLPRAR	0.981558	0.709785	0.845671
HLA-A0201	SLVPSSLEA	MTFSLAAMSCWL	SSWF	0.788843	0.902252	0.845547
HLA-A2402	PYLRILCQL	LPVNCPFPRPSPGLPAECHSPAGVCHLAEV	EKGFQDQALQDTECGKVDTRFLFPSD	0.938352	0.752128	0.84524
HLA-A0201	LLIPPLRFL	QQDLVSTVNVVYSQTTQPVYNAPRACFQGP	IMRLVKFQKITFQFNLHILSLKHLVTLRLN	0.957895	0.732234	0.845064
HLA-A0301	RVVQQQKLKKK	KPAKSKTAAAASEKNRGPRKGGRVIAPKKA	SESGRRSNMTW	0.998996	0.691119	0.845058
HLA-A1101	IQPPVPVPK	RRLLAQHATSECPKRTQPCTYCTKEFVFDT	AACCLPQPMWCGHCGSGGPARPSEGQL	0.970433	0.718704	0.844569
HLA-A2402	TWLAEGKAKF	PTNVRKRKFINRDLAHDSEELFQDLSQLQE	ALKGGKATLEGERKEVLNLLS	0.995448	0.693293	0.844371
HLA-A0301	SVVGNVLVRKR	CSQGSGILHYAHGDSQQTHLLKQEAPWALV	THRVLVLKSRDRALI	0.956787	0.73134	0.844064
HLA-A1101	HMLGQTTWLK	LAHLKMSLSLEVATYRYETSPVHPGTQRHT	GTRGVGDGNSAATGFCDSRLVTSTPEHVLP	0.816026	0.87175	0.843888
HLA-A0101	SSGVVFLY	MAQLFLPLLAALVLAQAPAALADVLEGD	REGSARYAFSFSGAQEACARIGAHIATPEQ	0.985764	0.701639	0.843702
HLA-A0201	YILTLNLLI	GPKHWPTSRFAHVMKLRQAALRTAREKWSD	AENKTIVAPMLESRGLYSNFWCGITPKGFY	0.945621	0.741499	0.84356
HLA-A1101	TISYGLSINK	IYKRKLCSTTHHVNLAKWIVRLINRYIKYK	FGNVGLIDIHPNCI	0.959621	0.726812	0.843216
HLA-A1101	QVRGTLTPK	MCQLHLKSEKPQTKLLILHQAVAVILSLEQ	QPALREGKKKKFLPYRQSRQPHCQEPILGL	0.90377	0.781121	0.842446
HLA-A0301	LINRYIKYK	NFYCFVSIFIYKRKLCSTTHHVNLAKWIVR	TISYGLSINKFGNVGLIDIHPNCI	0.970734	0.71395	0.842342
HLA-A0201	RQLHTLFLV	KGDRTLPVRFGNVEAPWRLLLAPMLVMFFG	ALVMSSTRTTGDWQKFGWMNLKISSTSYPQ	0.762607	0.921394	0.842
HLA-A0301	ATLTQTWWK	FSKPFMTLGISILYRKPNGLVLMSGIIHTL	TILPC	0.736194	0.947546	0.84187
HLA-A2402	IFLTKFGVLL	LKIHLLLKEWRLMKLLTLMTWMNILSYYMK		0.90564	0.777842	0.841741
HLA-A0101	ASFPLPSSY	IVMEGYLFKRASNAFKTWNRKKPDHIRYQM	SSFLFGTRKLIINLHSSWITCNG	0.853079	0.829663	0.841371
HLA-A0301	LLFLQQLGK	TRPERLYIQVFLKKDDSVGYRALVQTEDHL	VVLWSREESLAEVVCLEMVDLPLTGAQAEL	0.991497	0.690917	0.841207
HLA-A0201	TMWDGATTA	SMGVWASWQMVWWGWMTLGRVRSCGSGQAM	SPVAMWRWSLSLTG	0.767542	0.914632	0.841087
HLA-A1101	GTLTPKQPALR	LHLKSEKPQTKLLILHQAVAVILSLEQQVR	EGKKKKFLPYRQSRQPHCQEPILGLVKLPT	0.989749	0.692155	0.840952
HLA-A2402	NWPCLTYVF	MMVEWVGEEKE	SCSLYPSTPLPVSSSFRPLILVYSNCRKTY	0.914675	0.766602	0.840638
HLA-A0201	ILPPWSPKA	PWKENISCSSTTFIKSTICLKMGCPGWPQV	QRLQV	0.76174	0.918863	0.840301
HLA-A0301	AAKDVIVSR	FIQEGARLGRTPAEVVSTCDITFACVSDPK	GGRFLEAPVSGNQQLSNDGMLVILAAGDRG	0.814475	0.865265	0.83987
HLA-A1101	GVAEYSLRGK	SGGELIERDGKKYKLFYGMSSEMAMKKYAG	DSGSSF	0.97925	0.699538	0.839394
HLA-A1101	LTDQTGNLLRK	ICEKTVLKRVLKELWKLVMNTMEKTIVLPP	HGKGLEKGRVKLPSHSDGTQMIFNAAKELG	0.984966	0.693046	0.839006
HLA-A2402	FHTPLLISF	CQNMWMLYWEKDINTSELSFHCPQQPQWCG	SKLWERTVPTVTTSHCPRKYLTNWRTTSKK	0.820313	0.857632	0.838973
HLA-A1101	MLGQTTWLK	AHLKMSLSLEVATYRYETSPVHPGTQRHTH	GTRGVGDGNSAATGFCDSRLVTSTPEHVLP	0.828368	0.849379	0.838874
HLA-A2402	IYRETNSFI	VPEKSSLFHQEKFWSGEHVWSMHACPCYNF		0.889227	0.788429	0.838828
HLA-A1101	KTGQNHPFFR	QLERKRTRELLELGIDNEDSEHENDDDTNQ	RSDSMTFLGCIPPNPFEVPLAEAIPLADQP	0.864479	0.812319	0.838399
HLA-A0301	TTFIKSTICLK	YKFIQLSEFGFGQVIIVSEEPWKENISCSS	MGCPGWPQVILPPWSPKAQRLQV	0.955815	0.720654	0.838234
HLA-A2402	VFPELETNVL	PDELWNSLGPHPIPVIFKQQTANRMRNRLQ	MVDDDTLISTPDLVFAFSVWQQFPDQIVGF	0.78153	0.894804	0.838167
HLA-A2402	FLLPKQNHLW	M	VFPEKPVPAPKASWLEETRPNPFAALTGGS	0.881825	0.794372	0.838099
HLA-A1101	SSINQTNSTK	IWTSRLPHCVFNQDSFEHALEGEFQNEKKK	QGQVFEYLYLDT	0.972116	0.703759	0.837937
HLA-A1101	GTLSATFCLR	LPATWERGVSSQCTPTAQAPCPRPRRASGP	LWDCSWPRAWPALRSCWSTCAAVATPRMLG	0.925032	0.750267	0.83765
HLA-A1101	AANFFLQER	MD	IKVNGKAGNLGGGVVTIERSKSKITVTSEV	0.871964	0.801846	0.836905
HLA-A0201	AVLTPFERV	FCTTLPPSFLRVDDRATSSTTDSSRAVSEM	RRDPPVCTVSYQRF	0.751507	0.921408	0.836458
HLA-A1101	RAQDISRLR	LEHVQTRLREIQPCLAESRAAREKESFNLK	RKLEKQRKVEVYADADEILQEEIKEYKARL	0.76329	0.907711	0.8355
HLA-A0301	ALLPHLRK	GVERAGPEQELTRLLEFYDATAHFAKGLEM	HSFLPVL	0.996835	0.674013	0.835424
HLA-A0201	MTIPQFQTV	DTCRSLKYPYVAVMLKVADHSGQVKTKCFE	QGNCCSY	0.702226	0.967984	0.835105
HLA-A2402	RYPQSPLSHL	LGLKITYFALMDGKVYDITVGWMPACRYLP	IWFSDSRHQRAAESHPRCPSC	0.94023	0.729723	0.834977
HLA-A2402	HYLQHRGDHL	SQVSFWLNRESVPARTVFEENTSSPSKENQ	SHQPGQGH	0.839769	0.830074	0.834921
HLA-A1101	RIYGQAKMK	QVFHISCFRCSYCNNKLRATMMKALGTDHT	TKRFWRDQPSLQMQGRPLTAQG	0.851874	0.817199	0.834537
HLA-A0101	CTEVQAGVLY	AANNYARGHYTIGKEIIDLVLDRIRKLADQ	LPGAPGFHSCS	0.975523	0.692299	0.833911
HLA-A1101	YTSYDYLKR	AASHLSEPAKPAHSQNQSNFSSYSSKFLGS	NVKW	0.872036	0.795491	0.833764
HLA-A2402	LYLIEMDSQF	SAQLLYKMIKSKTEYPLHKAIKVEREDVVF	CRLEV	0.986755	0.680476	0.833616
HLA-A1101	LSSPRPIRK	LDIAEAHPQFSKEDRSRSISGASSGLSTSP	LVLPPPPPEPPFVARPLATSTEPEACGSAS	0.966613	0.700534	0.833574
HLA-A2402	FFFFHFSTLF	HIEKNEVETNADTFCLYGVFLFLFFFSFSL	AFFFCGGGVGRRGCPRENKTHCFNLALNQP	0.838635	0.828269	0.833452
HLA-A0101	YSEKEKGTY	TVNTLNAQYHSCKPHATAGPLYSDNSNISR	LNSIPNLASIHNRFLDNVFLGDRRVFPDII	0.922306	0.744531	0.833418
HLA-A2402	VYSVAQAGVQW	MQVSSLNEVKIYSLSCGKSLPE	HNHGSPQP	0.994458	0.670753	0.832606
HLA-A2402	PYMVTNVSDQF	MDGFYDQQV	ESCCL	0.945969	0.718564	0.832267
HLA-A0201	LLLGLSRFLV	MPARSLLFACPYILP	SYSDSHPF	0.9891	0.67346	0.83128
HLA-A0201	RLWEWESGI	WKIFKSDSEVAGYIRQAGDFHQVGRCLGAG	ENKA	0.670929	0.990667	0.830798
HLA-A1101	SVPRAWWTK	ATSQRGWTSCRPRPSSPRRSCSLSTGALRM	TPSNSFTRSSSLREMPPPMHTSSSTPLMRT	0.848533	0.812307	0.83042
HLA-A1101	AVAGTSCGK	LYYVKDIPATLKFFHSLLGTNAKMLIIVVS	STDHAFPRMTSASISHQMTSLRCWTT	0.96702	0.693082	0.830051
HLA-A2402	KFIQLSEFGF	VSLFYLGCSRTPNVKLSSCLGLPCCWDYSY	GQVIIVSEEPWKENISCSSTTFIKSTICLK	0.957217	0.702344	0.829781
HLA-A0301	LLKEWRLMK	QLLYYLQNRRDSLSGKGKKKKNQASLKIHL	LLTLMTWMNILSYYMKIFLTKFGVLL	0.874457	0.782533	0.828495
HLA-A0301	RVAAGPTRR	MENGGSMQVSSHDPRGRASS	GLPRVRSSDQEGEGSSRKGRHRSGQRRAGS	0.945114	0.710878	0.827996
HLA-A1101	AVWVSEGKAK	HLFTATINLNSANDSWFGSLKDTIQHQQGE	TQNKEESYDFSKSYEYKSNPSAVAGNETPG	0.963052	0.692462	0.827757
HLA-A0301	TQTDPKMLSK	IKSKEEESVHVTQRKTHYSMDSLSSWYMTV	KRTTSSQWQSPPVVVILKDMESFATKVLQD	0.819431	0.835901	0.827666
HLA-A1101	AVQAVPRTR	LGLGPCARPLPPVVGQGQPPGAGEDAHLGP	GLPGEAPGRAALPQQAGLAHPAGLLRGWPR	0.932253	0.722299	0.827276
HLA-A0201	STFQKPEFV	NGFQTAIDIFEDRIRGIDIIKWMERYLRDV	FW	0.725748	0.928296	0.827022
HLA-A0301	GVAEYSLRGK	SGGELIERDGKKYKLFYGMSSEMAMKKYAG	DSGSSF	0.968313	0.684226	0.82627
HLA-A2402	KYYFAWTLGF	EYNIDEHFQATASWPTKIIYLYISLLAARP	GFRGYDENGAARWDLISNLRIQQIEMSTSF	0.972233	0.680127	0.82618
HLA-A0101	STTEIPCKY	FAYDSVPSCHSIYMRQEGFLAHPSRTEVKL	RSE	0.682538	0.969726	0.826132
HLA-A0201	ILKVLLFSV	PGITEELLRSQLYPEVPPEEFRPFLAKMRG	VSGLEQNPLAAGFRLSPPCLPLSSQAERLF	0.912114	0.739613	0.825864
HLA-A0201	WLFGLENSSV	SSRGHTHPPTHQEGNQERVPQRRLTAEMIK	LI	0.996326	0.654314	0.82532
HLA-A0101	SMEKSTHFLY	AVEEQRSVILHLLSQLKLGMDLTRVSLVCW	PVHMLGQF	0.929218	0.721344	0.825281
HLA-A2402	AFFKRLKTF	EGPEHVNFYVEYGVAGSKKQFHYPIFNLGD	LRIYYGSS	0.880415	0.769266	0.82484
HLA-A0101	VWDQEFLKY	ILKKWCTHHKDDPPPPEDDENKEKRTDDIP	TLRKTTVSLQAANYLDIKGLLDVTCKTVAN	0.976844	0.67223	0.824537
HLA-A2402	YVIPPQASLVF	KGMDQGLLGMCPGERRKIIIPPFLAYGEKG	HVLLIDVHNPKDAVQLETLELPPGCVRRAG	0.955217	0.693835	0.824526
HLA-A2402	RWSPFVALHL	FVRAGPACSSREACSSPRAGWNPAGFRLPG	VCQIREVNIRAWC	0.895155	0.751481	0.823318
HLA-A1101	RISLEGLLK	LNVTSTWNLASPLLSVSVDGTQRTVQVSVV	SRILVSTCVANT	0.93373	0.71214	0.822935
HLA-A0201	VLMSGIIHT	ITYVREKVIDFSKPFMTLGISILYRKPNGL	LATLTQTWWKTILPC	0.851735	0.793742	0.822739
HLA-A0201	YLGDRASHL	PLLQWAPEGKVGGQLTLGEMIGWRREQRYL	GRVGSAPPSHPPSSVWTIEPHPAPRTAPGR	0.719146	0.926298	0.822722
HLA-A1101	SLNLNVPAGK	KMSPHSLTCVTSSHWDRPYSREVAAFPLVS	AWASSYPDGCTLLAS	0.94523	0.699909	0.82257
HLA-A2402	HFRDPQCLALF	VVPFSLFGKSFIRRCHLSSDSFIQIALQLA	RVAVDKHQALLKAAMSGQGVDRHLFALYIV	0.75009	0.895004	0.822547
HLA-A0301	QTDPKMLSKK	KSKEEESVHVTQRKTHYSMDSLSSWYMTVT	RTTSSQWQSPPVVVILKDMESFATKVLQDF	0.967756	0.677091	0.822424
HLA-A2402	KYAGGVAEYSL	GHSESGGELIERDGKKYKLFYGMSSEMAMK	RGKDSGSSF	0.985187	0.659384	0.822285
HLA-A0101	STKQGQVFEY	HCVFNQDSFEHALEGEFQNEKKKSSINQTN	LYLDT	0.78964	0.854499	0.822069
HLA-A0301	RVRINVPPHR	PRAEQRNFLRSSGTSQPHPGHGYLGEHRCH	GLLWALSR	0.844594	0.797831	0.821212
HLA-A0301	RDIGYILLK	YGHRQYLECEVFRVEGIKDNLDDIKRIIKA	MEKMENLCHLCCVTLWG	0.973907	0.668166	0.821036
HLA-A0101	MTWMNILSY	SGKGKKKKNQASLKIHLLLKEWRLMKLLTL	YMKIFLTKFGVLL	0.820719	0.821276	0.820997
HLA-A0201	FLYDTDRGYY	GESQFVLQLRPSLRGALLSLLDHYEWNCFV	RGYR	0.906148	0.735691	0.82092
HLA-A0201	FLFFFSFSL	SKFLAGFVCHIEKNEVETNADTFCLYGVFL	FFFFHFSTLFAFFFCGGGVGRRGCPRENKT	0.778641	0.863006	0.820824
HLA-A0301	MLGQTTWLK	AHLKMSLSLEVATYRYETSPVHPGTQRHTH	GTRGVGDGNSAATGFCDSRLVTSTPEHVLP	0.800136	0.840964	0.82055
HLA-A0201	SQWGHPARL	RLASSGLLLQTNAALLNHPLPGQRGLPQSM	EPDPQPAVANVSCALAGDTFQEGRCSEHWK	0.711647	0.929351	0.820499
HLA-A2402	VLPPPPPEPPF	SKEDRSRSISGASSGLSTSPLSSPRPIRKL	VARPLATSTEPEACGSASRPGHVLPLQAAL	0.992299	0.64817	0.820235
HLA-A2402	LWDIAGALHL	SFSKHYKSTVGVDFALKVLQWSDYEIVRLQ	YDTIVLSGCLCLCYYV	0.93535	0.704405	0.819878
HLA-A0301	RTYRKKPMK	YMLAELILSTWEGGYNLQCQDLTSAGEADI	KDMQEPPAGKEVKNGFSKAYFTAANGVMNK	0.923886	0.715809	0.819847
HLA-A0301	KTLAFCVTK	DDKKERSLLPALRAWCRTIAGDLVWAFGGK	VFMLFVSHLSGLMFFNL	0.690061	0.949375	0.819718
HLA-A0301	LVWAFGGKK	YFSECNKCDDKKERSLLPALRAWCRTIAGD	TLAFCVTKVFMLFVSHLSGLMFFNL	0.947729	0.690673	0.819201
HLA-A1101	VSVPVASNR	MSGGESIRQPINWADD	R	0.746191	0.892062	0.819126
HLA-A1101	TMGAWVSTEK	NSSSSASSEASETCQSVSECSSPTSVSSGS	RRKEKREPDPNGGGPTTASGPPAAAEEAQR	0.770038	0.867587	0.818812
HLA-A0301	SLSSQGFLHLK	RADAESLLSLCKEGSYLVRLSETNPQDCSL	FARTRENQVVLGQHSGPFPSVPELVLHYSS	0.936181	0.700953	0.818567
HLA-A1101	SVHKVIER	GFKRAFIITGQTYTRKVDIEVLSVLASLGA	RIRQELPFMATENIIMAMVKAGGSRQVQRF	0.977023	0.659915	0.818469
HLA-A1101	SVHKVIER	GFKRAFIITGQTYTRKVDIEVLSVLASLGA	RIRQELPFMATENIIMAMVKAGGSRQDCHE	0.976999	0.659915	0.818457
HLA-A0301	RSSCPGLPK	GTLNGRTGWFPSNYVREIKSSGWSQTPGLQ	CWDYRGEPPCPGFISLNELHTNV	0.86738	0.768897	0.818138
HLA-A0201	SLPSLVKRI	TTYKSEIKYSCQEPYYKMLNNNTECGQPSR	IGGRNAEPGLFPWQALIVVEDTSRVPNDKW	0.829565	0.806382	0.817973
HLA-A0201	ALPPLPTV	PTNTQGKPLCPWAPPGSPYLYWGREKPSHL	AYSALLSSQGGSSCALSSSLLLLALF	0.999282	0.636057	0.817669
HLA-A0301	RLHPVHAR	ELTVRRVQGVLRGRARARAAAGGSERALRC	GAHVRVHVPGHRRYRRCRAPEPSARVHAAA	0.942086	0.692289	0.817188
HLA-A1101	LSTTEIPCK	DFAYDSVPSCHSIYMRQEGFLAHPSRTEVK	YRSE	0.795503	0.837724	0.816614
HLA-A0101	LTDQTGNLLR	ICEKTVLKRVLKELWKLVMNTMEKTIVLPP	KHGKGLEKGRVKLPSHSDGTQMIFNAAKEL	0.948746	0.684326	0.816536
HLA-A1101	GTTDQVPRQK	MASGRRGWDSSHEDDLPVYLARP	YGGMFCNVEGAFESKT	0.978035	0.654718	0.816377
HLA-A2402	SHIDADGQGF	WRTEMKQEREPVGTCFLQDGTKTVEYAPCR	CQGGFSIDFTKADRVLLGGPGSFYWQGQLI	0.804593	0.827645	0.816119
HLA-A0201	ILYRKPNGL	ADLAVAPLAITYVREKVIDFSKPFMTLGIS	VLMSGIIHTLATLTQTWWKTILPC	0.850852	0.78137	0.816111
HLA-A0201	VMSPVSVYKV	KKDHISRAFAGASQTHTLTSECPIPAFPHL	ESNYLSLL	0.762027	0.868241	0.815134
HLA-A0201	ALIQKLVRWV	STVSLSAESGKSEKGQPQNSKKQSPPKKNR	GK	0.896173	0.732186	0.81418
HLA-A0301	VTQTDPKMLSK	DIKSKEEESVHVTQRKTHYSMDSLSSWYMT	KRTTSSQWQSPPVVVILKDMESFATKVLQD	0.828365	0.798222	0.813294
HLA-A2402	RYSEKEKGTYL	ITVNTLNAQYHSCKPHATAGPLYSDNSNIS	NSIPNLASIHNRFLDNVFLGDRRVFPDIIL	0.95305	0.673497	0.813273
HLA-A1101	SSGVVFLYR	MAQLFLPLLAALVLAQAPAALADVLEGD	EGSARYAFSFSGAQEACARIGAHIATPEQL	0.986443	0.639679	0.813061
HLA-A2402	QYWLKPPKL	LVLKYCYNLPFRLLMLTPCLKLFFQLCPVI	IKLVLQCCISLYQILLQVKTCCTLHLYQFL	0.967468	0.657988	0.812728
HLA-A1101	RTPSSFTPR	TVFGSGIGASCVSLLTLSHHSEGIPTSRSP	PTALRKWPGPNTIPETSSTFTSG	0.877144	0.748088	0.812616
HLA-A2402	YYYEKGIMQKI	LIEPEEVARRWGIQKNRPAMNYDKLSRSLR	ISVHC	0.908701	0.715647	0.812174
HLA-A0101	NLQQVTLSY	LPDDCTIGYIVEALLGVPLIRSGLFHSHLE	GMFENKRNAVHVKGPFSVEADPSRFRSIHC	0.934562	0.689532	0.812047
HLA-A1101	VSVGEIVTR	RRGCPRENKTHCFNLALNQPKNNFKCKCFR	NQQMSGKENSLTEIWLMIQKNSFKI	0.839954	0.78277	0.811362
HLA-A0301	ALGPNTESAK	TQALVSTAWTSMWCWVGQVSASQTRSAGQA	RRPCAGSSRSMMGSSFLAN	0.928976	0.693238	0.811107
HLA-A0201	YLNSIPNLA	YHSCKPHATAGPLYSDNSNISRYSEKEKGT	SIHNRFLDNVFLGDRRVFPDIILE	0.737639	0.88443	0.811035
HLA-A0201	SKIDKFFKL	LLKVMGFGLYLMDGNVSNIYKLDAKKRINL	QVVPLFGDMQIELARYIKTSAHYEENKSKW	0.895775	0.725428	0.810602
HLA-A0101	EMDWKEKY	GKTLRSEMNERNYFVRDKLDPDMALCRNAR	INRDYSKIFTENIVEQPCPDVFWFPIFSEK	0.983863	0.636806	0.810334
HLA-A1101	GVNVTTEVK	TLLEALDCILPPTRPTDKPLRLPLQDVYKI	SVEMHHEALSEALPGDNVGFNVKNVSVKDV	0.96237	0.657805	0.810088
HLA-A0301	YIKYKTISY	FVSIFIYKRKLCSTTHHVNLAKWIVRLINR	GLSINKFGNVGLIDIHPNCI	0.905828	0.713698	0.809763
HLA-A1101	GTLSPAAPCWR	IERRDGGDNARLELSGCSLGSRRPAWDRKR	RSAPPPPTAWGSAPSASNPAPTEGRRRQGK	0.891163	0.727857	0.80951
HLA-A1101	LSAAKVLTR	VAHVDQRSREVLQMWSVLQDGPISRVIVFS	RGNPSTLGGRSGRIT	0.841564	0.776245	0.808904
HLA-A1101	STFPHEGAGRR	YVCLAMGGTCAMLASASATPAGTPSRAPAT	QRPSAGCTARIWPASAHPRNRTSSTTGTGS	0.972381	0.643984	0.808183
HLA-A0301	GLSRFLVSY	MPARSLLFACPYILPLLL	SDSHPF	0.924693	0.691615	0.808154
HLA-A1101	SQAVPGPLR	PDTNIQVLLDLKYNLSAEGISCITCSGEAS	CPGPKDCWSERCRIQGPHQCQTSGKSHSPL	0.869108	0.747041	0.808074
HLA-A0301	LLRFPDQLK	IVLEGVDRAGKSTQSRKLVEALCAAGHRAE	SANF	0.782955	0.832361	0.807658
HLA-A1101	SMSSWPWTSR	CDLERWRGWRKRGRASRTRWPATCRSTRTC	SPPTGSC	0.876069	0.738512	0.807291
HLA-A1101	STTEIPCKYR	FAYDSVPSCHSIYMRQEGFLAHPSRTEVKL	SE	0.732966	0.880886	0.806926
HLA-A0101	EAEEGTQKY	APRCLPRARRGPGAHPRGGRCPPAETALFR	SLPSDPAGQAAF	0.884126	0.729582	0.806854
HLA-A0301	YMMEPGVLR	DSRLEASSSQSFGLGPHRGRLNIQAWRTAI	SRTPIHGFRWTLGTPPASRVLSHRAGTLSG	0.65767	0.955894	0.806782
HLA-A2402	LYGVFLFLFF	QQQLLHSKFLAGFVCHIEKNEVETNADTFC	FSFSLFFFFHFSTLFAFFFCGGGVGRRGCP	0.994804	0.61844	0.806622
HLA-A1101	RTGTGPSTLR	TKTPSNSFTRSSSLREMPPPMHTSSSTPLM	TLWLASPSCCGAQSTRSSSGPLISTTLTRM	0.911822	0.700879	0.806351
HLA-A0301	RVSPASPPPGR	PPPALGPTAVGARGGEAGGQSPRPQQRPEG	PPRRGRQVGAEGRVRLGGGEGFVVSSPRGL	0.949198	0.66272	0.805959
HLA-A0101	TTDQPGTAMH	VALPCLFTLQPRPSAARDAPRIKWTKVLCS		0.703648	0.907875	0.805762
HLA-A0301	CLYSRQIAIK	RIKKEPQSPRTDPALSCSRKPPLPYHHGEQ	SPAPGALGQSPLQPFPRAEQRNFLRSSGTS	0.9016	0.709106	0.805353
HLA-A1101	RAGFPGPTLR	ALASVLLLLLWAPALSLLAGSRSHRLPLLL	AGHR	0.889212	0.721041	0.805127
HLA-A1101	LLAPQTLPSK	VICFCLLGITCAIPVKQADSGSSEEKQKQN	SNESHDHMDDMDDEDDDDHVDSQDSIDSND	0.951743	0.658324	0.805034
HLA-A2402	GYQDFVSLEAF	SLLESHSSKLDPHKREVLLALADSHADGQI	LDL	0.9904	0.618771	0.804585
HLA-A2402	EYRKIKFVL	QKREQSRGTLGCYAGLQWCSQPRSRKVLSR	DLELARSFGGEGIEPI	0.921411	0.687316	0.804364
HLA-A2402	RFSESVSGTKF	SLRERYNSLDGYYSVACQPPSEPRTTVPLP	EEDHLSHYSPWSCGTIGSCINAIDSEPKDV	0.978641	0.629884	0.804263
HLA-A2402	KYRPRSQQL	KAEAPLLTQTRLITQSALHRAPHYNSCCRR	SQPLHP	0.967296	0.640074	0.803685
HLA-A0301	KLIRQHGIYY	FSKLWERTVPTVTTSHCPRKYLTNWRTTSK	IVGPC	0.86153	0.744304	0.802917
HLA-A0201	FQDGTPLTA	NKLNVEDVDSTKNRKLIDDYDSTKSGLDHK	EDIVHKIAARIYEENDRAVFDKIVSKLLNL	0.768824	0.8362	0.802512
HLA-A1101	QSAFADFGK	TFQFEIWENLDGNFSVSTILEKPQNMMVVG	IW	0.811385	0.792859	0.802122
HLA-A1101	SASSPAMTHR	KVTYTLLRKHRHQTKKSNLRSLADIGKTVS	NLTSSSLNDISDKPEKDQLKNKFMKKLPRD	0.864932	0.739116	0.802024
HLA-A2402	AYGEKGYVI	GSGWLIKGMDQGLLGMCPGERRKIIIPPFL	PPQASLVFHVLLIDVHNPKDAVQLETLELP	0.996855	0.60666	0.801757
HLA-A1101	ATECWIFIPR	LMKQLNIIQRLCIFSAITKRAEAITWLMWT	SPLSP	0.960212	0.641445	0.800829
HLA-A0301	ASLKIHLLLK	SKLNEVEQLLYYLQNRRDSLSGKGKKKKNQ	EWRLMKLLTLMTWMNILSYYMKIFLTKFGV	0.873892	0.726599	0.800246
HLA-A0201	KLADQCTEV	TGKEDAANNYARGHYTIGKEIIDLVLDRIR	QAGVLYLPGAPGFHSCS	0.623731	0.975803	0.799767
HLA-A2402	CYLLQLSSYF	LSLKHLVTLRLNLCLVQTQSQHPLTLLLVK	MRPQLLLVLKYCYNLPFRLLMLTPCLKLFF	0.976514	0.622602	0.799558
HLA-A1101	SLSSQGFLHLK	RADAESLLSLCKEGSYLVRLSETNPQDCSL	FARTRENQVVLGQHSGPFPSVPELVLHYSS	0.917897	0.681113	0.799505
HLA-A0301	KLSTTEIPCK	RDFAYDSVPSCHSIYMRQEGFLAHPSRTEV	YRSE	0.677863	0.921027	0.799445
HLA-A0301	DTIQPPVPVPK	MMRRLLAQHATSECPKRTQPCTYCTKEFVF	AACCLPQPMWCGHCGSGGPARPSEGQL	0.979789	0.61877	0.79928
HLA-A0301	TLGTPPASR	RLNIQAWRTAIYMMEPGVLRSRTPIHGFRW	VLSHRAGTLSGGMTGSHHTRSSSAMTVGPG	0.847689	0.750686	0.799188
HLA-A0201	SLPGGFFLGV	PCCLPFPTSPSASSCLCPLFSSLSWILPSQ	EP	0.65678	0.941294	0.799037
HLA-A2402	SYVDHFWL	FCLLVMLFLLKLARHSKFGMKGKKGCVYLA	MTNANYH	0.999373	0.597468	0.798421
HLA-A1101	FLYDTDRGYYR	GESQFVLQLRPSLRGALLSLLDHYEWNCFV	GYR	0.944778	0.651918	0.798348
HLA-A0301	KALQEMGSKK	KAREVSKKPASGPGAVVRPPKAPEDFSQNW	KPKIIQQNKKETSPQVKGEEMPAGKDQEAS	0.98343	0.610885	0.797158
HLA-A2402	TYIMRFSRNF	VCRLDWANGYYRQQRKLVEEIGWSYTGKHI	YCFVSIFIYKRKLCSTTHHVNLAKWIVRLI	0.963867	0.630082	0.796975
HLA-A0301	MTWMNILSY	SGKGKKKKNQASLKIHLLLKEWRLMKLLTL	YMKIFLTKFGVLL	0.80602	0.787101	0.79656
HLA-A0201	HLAEVAEYLL	KKGCLARVKKLSSPDNVNCRDTQGRHSTPL	QHGADVNAQDKGGLIPLHNAASYGHVDVAA	0.972027	0.620732	0.79638
HLA-A1101	SMDFPFEVTK	GLGEKTKLNPFKFVGLKNFPCTPESLCDVL	PLSLLP	0.84993	0.742761	0.796345
HLA-A2402	VFLGDRRVF	NISRYSEKEKGTYLNSIPNLASIHNRFLDN	PDIILE	0.849499	0.743156	0.796328
HLA-A0201	KLWERTVPT	KDINTSELSFHCPQQPQWCGFHTPLLISFS	VTTSHCPRKYLTNWRTTSKKLIRQHGIYYI	0.745714	0.8467	0.796207
HLA-A1101	STCLAWGLWK	ILTTTGHYSLFPLLFTAPEKKNLFLIGWKL	SAVNLYSLSPPGR	0.808846	0.782853	0.795849
HLA-A0201	GLFPWQALI	MLNNNTECGQPSRSLPSLVKRIIGGRNAEP	VVEDTSRVPNDKWFGSGALLSASWILTAAH	0.778985	0.812189	0.795587
HLA-A1101	FVHIPYLIHK	TGISNQVSHLFLFLVPFCVICLPDRHDFNI	CSLLFHLLPTLPLVICT	0.915745	0.67535	0.795547
HLA-A2402	FFFHFSTLF	IEKNEVETNADTFCLYGVFLFLFFFSFSLF	AFFFCGGGVGRRGCPRENKTHCFNLALNQP	0.744082	0.846148	0.795115
HLA-A0301	TTLTRGQLPK	RLNKSSEDFSAIDYLLFSSFQEFLQRQVWL	KVLNCFLWSLNGKILSSRKSKI	0.746229	0.843506	0.794868
HLA-A0201	GLLQGTFSFI	PCALGAALSARGPVYTEQPGAPAPDLPLPD	IETWREELGDQIGGPAWSLLARVAGRRRLA	0.857701	0.731903	0.794802
HLA-A0101	CSEDTIPSQDY	SRGLQLDTQRSSRDSLQCSSGYSTQTTTPC	DYFSVSGDQEADQQEFDKSSTIPRNSDISQ	0.97612	0.612038	0.794079
HLA-A0201	FLWSLNGKIL	LFSSFQEFLQRQVWLTTLTRGQLPKKVLNC	SSRKSKI	0.868865	0.719157	0.794011
HLA-A0301	KARDIGYILLK	RFYGHRQYLECEVFRVEGIKDNLDDIKRII	MEKMENLCHLCCVTLWG	0.956118	0.63065	0.793384
HLA-A1101	SVHKVIERR	GFKRAFIITGQTYTRKVDIEVLSVLASLGA	IRQELPFMATENIIMAMVKAGGSRQVQRFL	0.759739	0.82618	0.792959
HLA-A0301	ASFPALFPPR	CAGGRVHLAQRLGLGNGHYRKKMNVPRPQT	LASPAPRPLVSGLFFLGERRWRWGGTWRRG	0.912308	0.67351	0.792909
HLA-A1101	SVHKVIERR	GFKRAFIITGQTYTRKVDIEVLSVLASLGA	IRQELPFMATENIIMAMVKAGGSRQDCHEK	0.759263	0.82618	0.792722
HLA-A0101	DSGVVFLY	NEAYRFRVALPAYPASLTDVSLALSELRPN	REGSARYAFSFSGAQEACARIGAHIATPEQ	0.967961	0.616217	0.792089
HLA-A1101	TSTDYSLSGK	LGLFAWHRRRQKEKGRDLAPRVSYTPAMRM	GHAPGLPPLPLHTHIPQEWLCL	0.873414	0.71066	0.792037
HLA-A0301	KVFMLFVSH	LPALRAWCRTIAGDLVWAFGGKKTLAFCVT	LSGLMFFNL	0.953272	0.63056	0.791916
HLA-A0201	SQAAVHPGV	TTVCKKTQIQTAGRPDPGGAPERGPDAPGR	AVTA	0.630875	0.952916	0.791896
HLA-A0101	FADFGKIW	FEIWENLDGNFSVSTILEKPQNMMVVGQSA		0.912905	0.67084	0.791872
HLA-A1101	RTPQPAQPR	AALCPASRALEEKKGKGVSRRLPRRPRIAP	TGAPARRPRPRPSFPVSLRSAAPPTGTAGG	0.891686	0.690206	0.790946
HLA-A2402	RYPQSPLSHLI	LGLKITYFALMDGKVYDITVGWMPACRYLP	WFSDSRHQRAAESHPRCPSC	0.996595	0.585061	0.790828
HLA-A2402	IWLMIQKNSF	NFKCKCFRVSVGEIVTRNQQMSGKENSLTE	KI	0.996326	0.584644	0.790485
HLA-A1101	SQSRRTFIK	DVTLYGMLNTLKNRNPNLKTLLSVGGWNFG	SVPPFLRTHGFDGLDLAWLYPGRRDKQHFT	0.879835	0.700241	0.790038
HLA-A0201	GLYFEELQSA	IVLIPFLEQNNFSPNTRTQKGKKNLGREFA	FYR	0.861768	0.717896	0.789832
HLA-A0201	KVLEGMVVRKV	ANAGKDTNGSQFFITTVKTAWLDGKHVVFG	ESTKTDSRDKPLKDVIIADCGKIEVEKPFA	0.950113	0.629433	0.789773
HLA-A1101	LINRYIKYK	NFYCFVSIFIYKRKLCSTTHHVNLAKWIVR	TISYGLSINKFGNVGLIDIHPNCI	0.922409	0.656639	0.789524
HLA-A1101	SLYQILLQVK	CLKLFFQLCPVIQYWLKPPKLIKLVLQCCI	TCCTLHLYQFLMCRLLLICTLLHFKV	0.968741	0.609999	0.78937
HLA-A0301	SVFETNIREY	TLLILGNVSEFQRVVEVLQDSVDFDIDVNA	NKAIRNYTRFDDWYLWVQMYKGTVSMPVFQ	0.741601	0.836405	0.789003
HLA-A0301	TILGTGVEK	GVACARGMCFGATPSSFTSACLWSSNNVPG	WPVQALAPGSWQGVVRTHSHTAVKPRGSGP	0.87718	0.70082	0.789
HLA-A0201	YLQSDDESQSL	EEEDFQPREEAMLYHNQTAELRELLEFTHM	NSH	0.944766	0.633067	0.788917
HLA-A0201	TLFDEQYSQTA	PALPHDTAISGPLHYAPYHRSSAQPHFPDG	SYPSHSPLARGALSQHVLHKPVCAFCEVRK	0.899376	0.67788	0.788628
HLA-A0201	FLYPVHML	VILHLLSQLKLGMDLTRVSLVCWSMEKSTH	GQF	0.999943	0.576876	0.788409
HLA-A0201	WMAPPGNCGV	CLAPLAKVIHDNFGIVEGLMSMPSLPPRRL	MAAGLSRTSSLPLLALPRLWARSSLS	0.80805	0.768609	0.78833
HLA-A0301	TLTRGQLPK	LNKSSEDFSAIDYLLFSSFQEFLQRQVWLT	KVLNCFLWSLNGKILSSRKSKI	0.901728	0.673484	0.787606
HLA-A0101	PTQPSHVAGLY	AWNLDRRDLRPQQPSAVVEVPSAVLCLAFH	SGEVLVWDLSRLEDPLLWRTGLTDDTHTDP	0.858652	0.716444	0.787548
HLA-A0301	RMFCVTTVCK	GPQHPFISEDEKQELCISGGFQSRKHGYEP	KTQIQTAGRPDPGGAPERGPDAPGRSQAAV	0.83643	0.737321	0.786876
HLA-A0301	IQPPVPVPK	RRLLAQHATSECPKRTQPCTYCTKEFVFDT	AACCLPQPMWCGHCGSGGPARPSEGQL	0.919985	0.653544	0.786764
HLA-A0201	SLLFHLLPTL	LFLVPFCVICLPDRHDFNIFVHIPYLIHKC	PLVICT	0.751762	0.821551	0.786656
HLA-A0301	LLFTAPEKK	LPMSLLSVGKAGDASIFLILTTTGHYSLFP	NLFLIGWKLSTCLAWGLWKSAVNLYSLSPP	0.89896	0.674287	0.786624
HLA-A0301	RLLMLTPCLK	LVKCYLLQLSSYFMRPQLLLVLKYCYNLPF	LFFQLCPVIQYWLKPPKLIKLVLQCCISLY	0.849405	0.722554	0.785979
HLA-A1101	ASFQNGIFSER	ICRAAVHAGVVRNHGGYVDVMPVDKRKTYI	ILQEERHSECLLLC	0.825894	0.745052	0.785473
HLA-A1101	SSFTPRPTALR	GSGIGASCVSLLTLSHHSEGIPTSRSPRTP	KWPGPNTIPETSSTFTSG	0.970266	0.60033	0.785298
HLA-A0301	LVIDSTSIRGR	GLTPVFGPYTRPSESELWDMWAGIRNNDGN	SSEGAGWELLPL	0.977046	0.593139	0.785093
HLA-A1101	STHHRSGDLFK	VAVIMCHRLATPLLLGNTEKPLGFYWRVAA	FCHPTHHLQVPGREQWRGQARHQIRAPRRS	0.947784	0.622329	0.785056
HLA-A1101	ETSPVHPGTQR	QSQIAQVLEGRQQLAHLKMSLSLEVATYRY	HTHMLGQTTWLKGTRGVGDGNSAATGFCDS	0.683998	0.885514	0.784756
HLA-A1101	GSYTSYDYLKR	HIAASHLSEPAKPAHSQNQSNFSSYSSKFL	NVKW	0.899857	0.669402	0.78463
HLA-A2402	SYSFVGGVIGL	PDGVMNSEMHCTGDPDLVSEGRKSFPSIHS	IFAYICYRQHYPPLANTACHKPYVSLRVPA	0.825611	0.742982	0.784297
HLA-A1101	QLMAEKNVEK	HEVGWKYQAVTATLEEKRKEKAKIHYRKKK	KIDKYTEVLKTHGLLV	0.779898	0.788284	0.784091
HLA-A0301	QVSEPSLENK	GAPAARPTPPTCYSRMRALSQEITRDFNLL	VQRRKKILLVILPPRGSCCRSIVEDHISAF	0.962232	0.605427	0.783829
HLA-A0301	RTTSKKLIR	PLLISFSKLWERTVPTVTTSHCPRKYLTNW	QHGIYYIVGPC	0.864457	0.703111	0.783784
HLA-A0201	GVLNRALTFV	EEYGIMVNNDAVVRNVYHKYFHPKEALVSS	YPFGATLSVMKPAVAVLSTGSVCFPLNRPI	0.869847	0.697644	0.783745
HLA-A0301	RTHSHTAVK	SNNVPGTILGTGVEKWPVQALAPGSWQGVV	PRGSGPPGCSGRELTSH	0.814112	0.752634	0.783373
HLA-A0201	FLFSVAVPTT	SLLELRALQTLSLGGNQLQSIPAEIENLQS	ICGVQ	0.959644	0.606338	0.782991
HLA-A0301	GVMGLGLRVGR	MLRAGAPTGDLPRAGEVHT	GVEEMQRPGDPGSARGEVNAETNGSAGRSP	0.888915	0.676121	0.782518
HLA-A0301	AISWFRATNK	ISMPQKSFNATAERGEEMTFSCRASGSPEP	AGEDEKQAFLQVFVQPHIIQLKNETTYENG	0.871186	0.693514	0.78235
HLA-A0201	ALVSVVGNVLV	SGSCSQGSGILHYAHGDSQQTHLLKQEAPW	RKRTHRVLVLKSRDRALI	0.978155	0.586087	0.782121
HLA-A0101	HLSEELGYRY	CYMDASTRPTILLLPGLTGTSKESYILHMI	Q	0.675191	0.888924	0.782058
HLA-A1101	AEAHPQFSK	DGGSPVPARRAIEMAQHGQSKAMFSKSLDI	EDRSRSISGASSGLSTSPLSSPRPIRKLVL	0.94413	0.619266	0.781698
HLA-A0301	VSVVGNVLVRK	SCSQGSGILHYAHGDSQQTHLLKQEAPWAL	RTHRVLVLKSRDRALI	0.982222	0.581111	0.781667
HLA-A2402	SYTGKHITYI	ACIQLLCVCRLDWANGYYRQQRKLVEEIGW	MRFSRNFYCFVSIFIYKRKLCSTTHHVNLA	0.828993	0.733259	0.781126
HLA-A1101	TTGSSEPITVK	GLPRTMTQKDVEDMFSRFGRIINSRVLVDQ	FAANPNQNKNVALLSQLYHSPARRFGGPVH	0.972658	0.589549	0.781103
HLA-A1101	TGLPASHVHPR	GRVSGLVPSRFLTLLAHLVVVITLFWSRQH	GV	0.908705	0.652688	0.780697
HLA-A0201	LLSNALLPA	TVQVKFSELLWGGKGHRRLFHHSLLLRMSS	DTS	0.773269	0.787222	0.780246
HLA-A0301	ILPPWSPK	PWKENISCSSTTFIKSTICLKMGCPGWPQV	AQRLQV	0.985166	0.575258	0.780212
HLA-A0301	GLAHPAGLLR	AHLGPAVQAVPRTRGLPGEAPGRAALPQQA	GWPRPSPAPQGGL	0.957583	0.602729	0.780156
HLA-A0301	KLRPKELPR	SEDITTSPQLSKMPSTSLSLASGGGGGEKS	GEISWRWLPSFESLRWSQKMDKKKL	0.808389	0.751728	0.780059
HLA-A0201	GVMGLGLRV	MLRAGAPTGDLPRAGEVHT	GRGVEEMQRPGDPGSARGEVNAETNGSAGR	0.653098	0.906032	0.779565
HLA-A1101	HMFPREIVSRK	DRKEVVNIQTWINKPDVKHHFPCKEVKESG	GLAYIQSRQALNSVVKITSKKKHPELITFK	0.810151	0.748562	0.779357
HLA-A2402	LYTSLRWFCF	RCPFILPDNDEVIYGGLSSFICTGTVPGGS	LV	0.895924	0.662739	0.779332
HLA-A0201	ALVNALDNL	QAAREADVTRIKKHLSLEMVNFKHPQTHET	GQTSLHRAAYCGHLQTCRLLLSYGCDPNII	0.770913	0.787322	0.779118
HLA-A0301	WLKPPKLIK	LKYCYNLPFRLLMLTPCLKLFFQLCPVIQY	LVLQCCISLYQILLQVKTCCTLHLYQFLMC	0.881727	0.676434	0.779081
HLA-A0301	LLLPSFHLR	EPGEDPRVTRAKYFIRDEFLDQHCQWRWAS	CGH	0.877943	0.679724	0.778834
HLA-A1101	RTYRKKPMKK	YMLAELILSTWEGGYNLQCQDLTSAGEADI	DMQEPPAGKEVKNGFSKAYFTAANGVMNKK	0.986057	0.571422	0.77874
HLA-A0201	NLLAPQVFL	AVICFCLLGITCAIPVKQADSGSSEEKQKQ	NFS	0.903996	0.653295	0.778645
HLA-A1101	KTPSNSFTR	SCRPRPSSPRRSCSLSTGALRMSVPRAWWT	SSSLREMPPPMHTSSSTPLMRTGTGPSTLR	0.793528	0.762874	0.778201
HLA-A1101	RVAAGPTRR	MENGGSMQVSSHDPRGRASS	GLPRVRSSDQEGEGSSRKGRHRSGQRRAGS	0.837818	0.718541	0.77818
HLA-A0201	SQAERLFPL	KVLLFSVVSGLEQNPLAAGFRLSPPCLPLS	RPPLRGLHIGLLQICSFCRPFSLS	0.696383	0.859127	0.777755
HLA-A2402	QYHTEQHWTL	GCAAHSAVAMGKHVYIFGGMTPAGALDTMY	LKFDTLLPPGRLDHSMCIIPWPVTCASEKE	0.834478	0.720115	0.777297
HLA-A0101	ATGEAVSTHTY	AFADVEVLGPAVTFKVSANVQNVTTEDVEK	THTHVCAHTHARKHAHAQPGQRETHTTHMG	0.703913	0.84964	0.776777
HLA-A0301	KLRPSTSNSQR	SSPLTRSTPPVRGRAGPSGRAAASEETRAA	LPRPQGAAAKSSSQLPIPSAIPRPASRMPL	0.93019	0.623352	0.776771
HLA-A1101	RVKDARLQR	APMLEVALTLIDSWCKDHSYVIAGYYQANE	RWPPESPRASATLRSSW	0.719954	0.833394	0.776674
HLA-A0301	FLPPKGLLY	LKHRRTSETSISPPGSSIGSPNRVICVCIT	S	0.963398	0.589185	0.776292
HLA-A1101	YFLPIQTQK	MTGSHHTRSSSAMTVGPGGEVGTTAVGWTQ	LQC	0.792867	0.758411	0.775639
HLA-A1101	SSCPGLPK	TLNGRTGWFPSNYVREIKSSGWSQTPGLQR	CWDYRGEPPCPGFISLNELHTNV	0.955884	0.595198	0.775541
HLA-A0201	CLYGVFLFL	GQQQLLHSKFLAGFVCHIEKNEVETNADTF	FFFSFSLFFFFHFSTLFAFFFCGGGVGRRG	0.726071	0.824407	0.775239
HLA-A0301	RAGFPGPTLR	ALASVLLLLLWAPALSLLAGSRSHRLPLLL	AGHR	0.935144	0.614923	0.775033
HLA-A2402	PYLIHKCSLLF	NQVSHLFLFLVPFCVICLPDRHDFNIFVHI	HLLPTLPLVICT	0.973171	0.576441	0.774806
HLA-A2402	NYSQMRDEVF	SSSDRRNSGATFTEGSWSPELPFDNIVGKQ	KSNLVCAFIVLLFITAIQSLLPSSR	0.921638	0.627691	0.774665
HLA-A1101	HTEQHWTLLK	AAHSAVAMGKHVYIFGGMTPAGALDTMYQY	FDTLLPPGRLDHSMCIIPWPVTCASEKEDS	0.712205	0.836549	0.774377
HLA-A0101	SSEARNPARY	VFLSCSLGRLPCPLPPLPPCSLLSLCNPTR	CRPLIRSPSLAPQPLGFRTPSST	0.938765	0.609575	0.77417
HLA-A1101	LLFTAPEKK	LPMSLLSVGKAGDASIFLILTTTGHYSLFP	NLFLIGWKLSTCLAWGLWKSAVNLYSLSPP	0.915234	0.632476	0.773855
HLA-A0301	QVRGTLTPK	MCQLHLKSEKPQTKLLILHQAVAVILSLEQ	QPALREGKKKKFLPYRQSRQPHCQEPILGL	0.765269	0.782061	0.773665
HLA-A0301	TISYGLSINK	IYKRKLCSTTHHVNLAKWIVRLINRYIKYK	FGNVGLIDIHPNCI	0.955737	0.591176	0.773457
HLA-A1101	GSAPPAGPRY	SRGHLIVQLQELLHHWVLWSAVKSRWVIVA	SSGLIPTSRCCWTSSTT	0.916787	0.630091	0.773439
HLA-A1101	SVNSKRASK	TRAAKLRACQPNATHQPECATWQRCPTSGF	TKHCRTQSAGKWTQG	0.900308	0.646513	0.773411
HLA-A1101	LICTLLHFK	QCCISLYQILLQVKTCCTLHLYQFLMCRLL	V	0.844956	0.700927	0.772941
HLA-A1101	YVHFTLISR	ADLSHNRPTGGRSVLWMRPIALEMCRIIAA	GI	0.643932	0.90168	0.772806
HLA-A1101	SVGEIVTR	RGCPRENKTHCFNLALNQPKNNFKCKCFRV	NQQMSGKENSLTEIWLMIQKNSFKI	0.980629	0.563604	0.772117
HLA-A1101	SSLPLLALPR	LMSMPSLPPRRLWMAPPGNCGVMAAGLSRT	LWARSSLS	0.968817	0.575399	0.772108
HLA-A1101	SVFPLQER	TGKAEGAGFATTQTPLWLLGEVEAPRGGRL	KRGRDEELFL	0.953434	0.590729	0.772081
HLA-A1101	AVQEQHRQK	GYGDKYPQTWNGRLLAATFTLIGVSFFALP	HFEKRRNPAAGLIQSAWRFYATNLSRTDLH	0.933957	0.609317	0.771637
HLA-A2402	SYDYLKRNVKW	SHLSEPAKPAHSQNQSNFSSYSSKFLGSYT		0.703115	0.839724	0.77142
HLA-A1101	RLPPVSLVR	SAKMLMFVNISPLEENVSESLNSLRFASKV	TRGWL	0.766461	0.775726	0.771094
HLA-A1101	RTHSHTAVK	SNNVPGTILGTGVEKWPVQALAPGSWQGVV	PRGSGPPGCSGRELTSH	0.790228	0.751924	0.771076
HLA-A0301	LSSPRPIRK	LDIAEAHPQFSKEDRSRSISGASSGLSTSP	LVLPPPPPEPPFVARPLATSTEPEACGSAS	0.91379	0.62734	0.770565
HLA-A0301	TMGAWVSTEK	NSSSSASSEASETCQSVSECSSPTSVSSGS	RRKEKREPDPNGGGPTTASGPPAAAEEAQR	0.658152	0.882762	0.770457
HLA-A0301	YVHFTLISR	ADLSHNRPTGGRSVLWMRPIALEMCRIIAA	GI	0.742719	0.797378	0.770048
HLA-A0201	AVLPRPLVA	TEWASLFRHYSPPPFGLLGTAPAYSFGIAG	CYAQP	0.842635	0.697258	0.769946
HLA-A1101	RTYRKKPMK	YMLAELILSTWEGGYNLQCQDLTSAGEADI	KDMQEPPAGKEVKNGFSKAYFTAANGVMNK	0.922479	0.617247	0.769863
HLA-A0201	LLLQTNAAL	MGSQEVLGHAARLASSG	LNHPLPGQRGLPQSMSQWGHPARLEPDPQP	0.884143	0.655509	0.769826
HLA-A2402	IYLQILCF	PTFISKVNTAVQLILVAASLAAPVFNYADS	HHSCISL	0.999672	0.539965	0.769819
HLA-A2402	NFSSYSSKF	RRSFENKPPAHIAASHLSEPAKPAHSQNQS	LGSYTSYDYLKRNVKW	0.70202	0.837191	0.769605
HLA-A1101	SIRPPGPGGGR	LGGSGGKGLHACRGEPRGLLREASQTLSCH		0.636874	0.902066	0.76947
HLA-A0201	GLFPWQALIV	MLNNNTECGQPSRSLPSLVKRIIGGRNAEP	VEDTSRVPNDKWFGSGALLSASWILTAAHV	0.923853	0.614452	0.769152
HLA-A0101	YTGKHITY	CIQLLCVCRLDWANGYYRQQRKLVEEIGWS	IMRFSRNFYCFVSIFIYKRKLCSTTHHVNL	0.989401	0.54867	0.769035
HLA-A0101	RPNDSGVVFLY	VKVNEAYRFRVALPAYPASLTDVSLALSEL	REGSARYAFSFSGAQEACARIGAHIATPEQ	0.883494	0.654423	0.768958
HLA-A0201	GLFPWQALIVV	MLNNNTECGQPSRSLPSLVKRIIGGRNAEP	EDTSRVPNDKWFGSGALLSASWILTAAHVL	0.990904	0.546485	0.768694
HLA-A0301	RTVQVSVVR	SVEVDGSKLNVTSTWNLASPLLSVSVDGTQ	ISLEGLLKSRILVSTCVANT	0.732981	0.803997	0.768489
HLA-A0201	ILQTGVGSV	SANVQNVTTEDVEKATVDNKDKLEETSGLK	SNRRGAVCSAICSAVWVLANTVRTEAGPAG	0.734276	0.801689	0.767983
HLA-A0201	SLLSNALLPA	ATVQVKFSELLWGGKGHRRLFHHSLLLRMS	DTS	0.767014	0.768406	0.76771
HLA-A1101	SLKIHLLLK	KLNEVEQLLYYLQNRRDSLSGKGKKKKNQA	EWRLMKLLTLMTWMNILSYYMKIFLTKFGV	0.864652	0.670657	0.767655
HLA-A1101	RVSPASPPPGR	PPPALGPTAVGARGGEAGGQSPRPQQRPEG	PPRRGRQVGAEGRVRLGGGEGFVVSSPRGL	0.861032	0.674083	0.767558
HLA-A1101	HQYSIQNWK	VLVLSWYPPGMADDNGEPSDDLVPAILDTA	AV	0.629809	0.904867	0.767338
HLA-A0201	LLIPMELEM	ETEAATFAREQGFEKVKSLLLLSWIKTRKK	HLLEVFCLNWSLTSL	0.882774	0.651341	0.767058
HLA-A1101	ALGPNTESAK	TQALVSTAWTSMWCWVGQVSASQTRSAGQA	RRPCAGSSRSMMGSSFLAN	0.95539	0.578216	0.766803
HLA-A1101	ASNPAPTEGR	DRKRGTLSPAAPCWRRSAPPPPTAWGSAPS	RRQGKAS	0.929312	0.603677	0.766494
HLA-A1101	LVWAFGGKK	YFSECNKCDDKKERSLLPALRAWCRTIAGD	TLAFCVTKVFMLFVSHLSGLMFFNL	0.789594	0.743051	0.766323
HLA-A1101	KALQEMGSKK	KAREVSKKPASGPGAVVRPPKAPEDFSQNW	KPKIIQQNKKETSPQVKGEEMPAGKDQEAS	0.880258	0.651234	0.765746
HLA-A0301	HMLGQTTWLK	LAHLKMSLSLEVATYRYETSPVHPGTQRHT	GTRGVGDGNSAATGFCDSRLVTSTPEHVLP	0.657356	0.874038	0.765697
HLA-A0101	VLEGDSSGIY	MAQLFLPLLAALVLAQAPAALAD	RCEVQHGIDDSSDAVEVKVKGGLCPHWSPH	0.950617	0.580338	0.765477
HLA-A0201	ALRPDPKTQTL	PFVARPLATSTEPEACGSASRPGHVLPLQA	PCKAKLTDKPLQGTKSNPFPASTPARPPAT	0.882707	0.647593	0.76515
HLA-A1101	TTLTRMATSPK	GPSTLRTLWLASPSCCGAQSTRSSSGPLIS	RRCWPS	0.878646	0.650925	0.764786
HLA-A0201	YIFTNLLSSA	ATIIIHANASMSHTILLKAAELGMVSAYYT	LLFDAVYAVVTAVQELNRSQEIGVKPLSCG	0.792215	0.73733	0.764772
HLA-A0301	RVIGKTTEL	ASKLLGQNWVQNAFDGSCNFFRWLEHLRLL	ATF	0.765377	0.763872	0.764624
HLA-A0301	QLMAEKNVEK	HEVGWKYQAVTATLEEKRKEKAKIHYRKKK	KIDKYTEVLKTHGLLV	0.723197	0.80507	0.764133
HLA-A1101	TTLIKAEFIK	KSVPPFLRTHGFDGLDLAWLYPGRRDKQHF	EAQPGKKQLLLSAALSAGKVTIDSSYDIAK	0.934899	0.593077	0.763988
HLA-A1101	RMFCVTTVCK	GPQHPFISEDEKQELCISGGFQSRKHGYEP	KTQIQTAGRPDPGGAPERGPDAPGRSQAAV	0.859183	0.668752	0.763968
HLA-A1101	GTGVPSPAPR	MVGKGAKGMLVSTEARLRE	TSCQLLGRLRKAGTARAPECPADPGLGR	0.988769	0.538372	0.763571
HLA-A1101	TTLTRGQLPKK	RLNKSSEDFSAIDYLLFSSFQEFLQRQVWL	VLNCFLWSLNGKILSSRKSKI	0.883382	0.643695	0.763538
HLA-A0101	YVDHFWLM	CLLVMLFLLKLARHSKFGMKGKKGCVYLAS	TNANYH	0.97169	0.554366	0.763028
HLA-A0201	HLAEVPYL	EQLLNLPVNCPFPRPSPGLPAECHSPAGVC	RILCQLEKGFQDQALQDTECGKVDTRFLFP	0.999405	0.526614	0.76301
HLA-A0201	LMDGKVYDITV	CAECNRLHPAEEGDFWAESSMLGLKITYFA	GWMPACRYLPRYPQSPLSHLIWFSDSRHQR	0.951791	0.573362	0.762576
HLA-A1101	ATPAGTPSR	VGHAWRRRKGSAAYVCLAMGGTCAMLASAS	APATSTFPHEGAGRRQRPSAGCTARIWPAS	0.82901	0.695992	0.762501
HLA-A1101	RVAASTHHR	IMRLVAVIMCHRLATPLLLGNTEKPLGFYW	SGDLFKFCHPTHHLQVPGREQWRGQARHQI	0.753157	0.771006	0.762082
HLA-A2402	QWHDPGFTPF	VTSSHWDRPYSREVAAFPLTESRSVAQAGV	SYLSLPLGLQAPATMPG	0.98915	0.534678	0.761914
HLA-A1101	GQTQKGTVLK	MEENMEE	AFICN	0.880473	0.642621	0.761547
HLA-A1101	AVSTHTYTH	VEVLGPAVTFKVSANVQNVTTEDVEKATGE	THVCAHTHARKHAHAQPGQRETHTTHMGQP	0.953913	0.568563	0.761238
HLA-A1101	SLSAAKVLTR	RVAHVDQRSREVLQMWSVLQDGPISRVIVF	RGNPSTLGGRSGRIT	0.801651	0.720695	0.761173
HLA-A2402	SYPDGCTL	WDRPYSREVAAFPLVSSLNLNVPAGKAWAS	LAS	0.976704	0.545036	0.76087
HLA-A0201	KQFHYPIFNL	AAETYANISWEYEGPEHVNFYVEYGVAGSK	GDAFFKRLKTFLRIYYGSS	0.951926	0.569667	0.760797
HLA-A0301	KSFPSIHSSY	PDFFYRCFPDGVMNSEMHCTGDPDLVSEGR	SFVGGVIGLIFAYICYRQHYPPLANTACHK	0.722899	0.798266	0.760583
HLA-A0201	RLEPDPQPAV	LLQTNAALLNHPLPGQRGLPQSMSQWGHPA	ANVSCALAGDTFQEGRCSEHWK	0.93525	0.585531	0.76039
HLA-A1101	HLAEVPYLR	EQLLNLPVNCPFPRPSPGLPAECHSPAGVC	ILCQLEKGFQDQALQDTECGKVDTRFLFPS	0.822523	0.698255	0.760389
HLA-A2402	IYLNITIDY	AVFFLFPRSIDVKYIGVKSAYVSYDVQKRT	TVPTVIAEEMSYMYDFCTLISIKVHNIVLM	0.97785	0.541701	0.759776
HLA-A2402	PFNPLQRYIF	TDYVAYVAKDPVNRRGSRWSGGMTFAGRRA	IYLFSVSTETLPRS	0.992932	0.526567	0.75975
HLA-A2402	YFIPSTVVSPF	LEFGLGGSSMSTHLRLLVMFIMSAGTAIAS	AMIAFLSLDSSLQGLHSVSVCIGFTRAFRM	0.652825	0.866459	0.759642
HLA-A1101	AANFFLQER	KLVVKGGKKKKQVLKFTLDCTHPVEDGIMD	IKVNGKAGNLGGGVVTIERSKSKITVTSEV	0.874529	0.644455	0.759492
HLA-A0101	NLDEAEGIFL	GENGKNARDPRLSKREESIAKIGKKKYQKI	SLFPKLRATEQMTNVGC	0.922644	0.596194	0.759419
HLA-A1101	SVFFPPCSQHR	MLQDLSA	TLGT	0.885045	0.632908	0.758976
HLA-A0201	ALMQQVERM	EWYNPHPCNPDSDVVENNFTLLNSFWFGVG	ESPIDSADDLAKQTKIEYGAVEDGATMTFF	0.775981	0.741493	0.758737
HLA-A2402	GWRSTVRILF	MCSGAGVMMARWAARGRA		0.887039	0.630259	0.758649
HLA-A1101	ATMVGHAWR	PAGTSVQAQPVLPTDSASRGGVAVVPASAP	RRKGSAAYVCLAMGGTCAMLASASATPAGT	0.76692	0.74983	0.758375
HLA-A0301	RLFPLRPPL	FSVVSGLEQNPLAAGFRLSPPCLPLSSQAE	RGLHIGLLQICSFCRPFSLS	0.833834	0.682811	0.758323
HLA-A0101	PNDSGVVFLY	KVNEAYRFRVALPAYPASLTDVSLALSELR	REGSARYAFSFSGAQEACARIGAHIATPEQ	0.993366	0.522136	0.757751
HLA-A2402	SYTALNQKNW	ACIQLLCVCRLDWANGYYRQQRKLVEEIGW	GKKYPTCNSPKQSPINIDEDLTQVNVNLKK	0.873659	0.641623	0.757641
HLA-A2402	GFHTPLLISF	WCQNMWMLYWEKDINTSELSFHCPQQPQWC	SKLWERTVPTVTTSHCPRKYLTNWRTTSKK	0.96706	0.548131	0.757596
HLA-A2402	PWAPPGSPYL	LATYARPPRGPGPPTPAWAKPTNTQGKPLC	YWGREKPSHLALPPLPTVAYSALLSSQGGS	0.987684	0.526109	0.756896
HLA-A0301	SVYKVESNY	SRAFAGASQTHTLTSECPIPAFPHLVMSPV	LSLL	0.909237	0.604423	0.75683
HLA-A1101	LTDQTGNLLR	ICEKTVLKRVLKELWKLVMNTMEKTIVLPP	KHGKGLEKGRVKLPSHSDGTQMIFNAAKEL	0.812807	0.700602	0.756704
HLA-A1101	SSLRLPSGK	GLGPVMSGNTAYPVISCPPLTPDWGVQDVW	IH	0.769841	0.742265	0.756053
HLA-A1101	RVVQQQKLKKK	KPAKSKTAAAASEKNRGPRKGGRVIAPKKA	SESGRRSNMTW	0.935683	0.575158	0.755421
HLA-A0301	TTHHVNLAK	TGKHITYIMRFSRNFYCFVSIFIYKRKLCS	WIVRLINRYIKYKTISYGLSINKFGNVGLI	0.735319	0.77408	0.7547
HLA-A0301	ILLVILPPR	RALSQEITRDFNLLQVSEPSLENKVQRRKK	GSCCRSIVEDHISAFCLHIGIQIRVCCVCV	0.943965	0.565298	0.754631
HLA-A0201	RLVNQGEAPAV	MEEKYLPELMAEKDSLDPSFTHAL	NCRPAAVGGRVETRGPRGPLRALCCQRTRR	0.981862	0.527058	0.75446
HLA-A2402	SFQEFLQRQVW	EVKKRELVFLQFRLNKSSEDFSAIDYLLFS	LTTLTRGQLPKKVLNCFLWSLNGKILSSRK	0.938047	0.570824	0.754436
HLA-A1101	ASWPTSARKSK	SQAKKMLPITMPEGTTPLARRSLTSCWTEF	LEFSIYPAPQVSTAV	0.889242	0.61938	0.754311
HLA-A1101	QTGSQNFGK	YVERTFTGGTAASPPRGPLHTTDPQGSPQA	SGKFTGAMGKAQSPQKGATEPQAGFRCPQS	0.940122	0.568267	0.754194
HLA-A0301	TTFVQDTCMPK	ASAAAAELQASGGPRHPVCLLVLGMAGSGK	ALHRM	0.692026	0.816059	0.754043
HLA-A0201	TLAFCVTKV	DKKERSLLPALRAWCRTIAGDLVWAFGGKK	FMLFVSHLSGLMFFNL	0.631732	0.874942	0.753337
HLA-A0301	SLSVFTSVRQK	IRNHKYRSLNDLEKDVMLLCQNAQTFNLEG	IEKEDDSEGEESEEEEEGEEEGSESESRSV	0.971265	0.535128	0.753197
HLA-A0201	GMDLTRVSL	EDTCDHKEDDLGAVEEQRSVILHLLSQLKL	VCWSMEKSTHFLYPVHMLGQF	0.649443	0.856722	0.753083
HLA-A1101	GTSALDVQR	LWKRLLIARRSRKGFFAQPDRATLWQVPQP	TVHICQQ	0.902807	0.602901	0.752854
HLA-A1101	IQYWLKPPK	LLVLKYCYNLPFRLLMLTPCLKLFFQLCPV	LIKLVLQCCISLYQILLQVKTCCTLHLYQF	0.897234	0.608083	0.752659
HLA-A1101	AIVVWDCIPK	RTGVKEAVTTLIASGVSIKMITGDSQETAV	LPSQSQEKK	0.928514	0.57678	0.752647
HLA-A1101	TTASPSSSR	EADGQPAHQSPGPDPTHQPLLSPRGPTSCK	WPLACSIWRKHPSSWPSPAASCAAPSIPWA	0.793325	0.711556	0.75244
HLA-A2402	SYQQAQAQL	PGSHLPPLYLDGHVFASQPRLVPQTIPQQQ	GLRGGLPVSQSQEIFSSLQPFRSQVYMHPS	0.652175	0.852418	0.752297
HLA-A1101	ATIRLRPCNR	MVPEAWRSGLPQPRRRA	DADNQGSAGLRGHQTP	0.812077	0.692191	0.752134
HLA-A0201	AAFPLVSSL	DPRVNPLKMSPHSLTCVTSSHWDRPYSREV	NLNVPAGKAWASSYPDGCTLLAS	0.619387	0.882088	0.750738
HLA-A2402	RLPKLREFTF	SPHVPTVHSTDACWVPAGCWLWGGTVGGRH	QL	0.717036	0.784331	0.750683
HLA-A0301	SLLLPSFHLR	PEPGEDPRVTRAKYFIRDEFLDQHCQWRWA	CGH	0.848649	0.652316	0.750483
HLA-A1101	QQVRGTLTPK	RMCQLHLKSEKPQTKLLILHQAVAVILSLE	QPALREGKKKKFLPYRQSRQPHCQEPILGL	0.839062	0.661611	0.750337
HLA-A0301	FLLSLFTAK	GISAKSLRGRDSTRKQDASEKDSVPMGSPA	YCTRGRSWAAGREQQMERSLLIVLISWKTT	0.849208	0.651324	0.750266
HLA-A0201	CLYSRQIAI	RIKKEPQSPRTDPALSCSRKPPLPYHHGEQ	KSPAPGALGQSPLQPFPRAEQRNFLRSSGT	0.810037	0.690293	0.750165
HLA-A1101	RLSVFPLQER	WATGKAEGAGFATTQTPLWLLGEVEAPRGG	KRGRDEELFL	0.645068	0.855213	0.750141
HLA-A1101	TLGTPPASR	RLNIQAWRTAIYMMEPGVLRSRTPIHGFRW	VLSHRAGTLSGGMTGSHHTRSSSAMTVGPG	0.751852	0.748217	0.750035
HLA-A1101	SSTSYPQVLSK	LHTLFLVALVMSSTRTTGDWQKFGWMNLKI	WIMEMCQSEKH	0.838723	0.661021	0.749872
HLA-A0301	LMIQKNSFK	KCKCFRVSVGEIVTRNQQMSGKENSLTEIW	I	0.807865	0.691703	0.749784
HLA-A0201	VLLGGGRTL	MAEVQVLVLDGRGHLLGRLAAIVAKQ		0.710805	0.787941	0.749373
HLA-A0301	ALPSTVLRR	LQNWPRANITLQLSCTRAMCVSATTQAATP	STMGNSTPLSWLPLTRW	0.966706	0.531643	0.749175
HLA-A2402	LYFEELQSAFY	VLIPFLEQNNFSPNTRTQKGKKNLGREFAG	R	0.944956	0.553005	0.74898
HLA-A0301	RAQDISRLRRK	LEHVQTRLREIQPCLAESRAAREKESFNLK	LEKQRKVEVYADADEILQEEIKEYKARLTC	0.970353	0.527467	0.74891
HLA-A0301	SQHPLTLLLVK	QKITFQFNLHILSLKHLVTLRLNLCLVQTQ	CYLLQLSSYFMRPQLLLVLKYCYNLPFRLL	0.796047	0.701628	0.748837
HLA-A1101	TILDCWDPVQK	QALKGILSSPMARAEKSRTAWTDLLRSALT		0.830764	0.666835	0.7488
HLA-A0301	KTITAEDFRK	KEMEQIVEEEEKFKKQWEEDWGSKEQLLLP	YEEGFDPYSMFTPEQIMGKDVRLLRIKKEG	0.887894	0.608742	0.748318
HLA-A0201	FGFGQVIIV	CSRTPNVKLSSCLGLPCCWDYSYKFIQLSE	SEEPWKENISCSSTTFIKSTICLKMGCPGW	0.666175	0.830158	0.748166
HLA-A0301	GALSQHVLHK	SAQPHFPDGTLFDEQYSQTASYPSHSPLAR	PVCAFCEVRKL	0.647729	0.848201	0.747965
HLA-A0301	RLSVFPLQERK	WATGKAEGAGFATTQTPLWLLGEVEAPRGG	RGRDEELFL	0.986731	0.50911	0.74792
HLA-A0301	VLQGYSLLH	APRHRPHEVEEATGALTLTRKCFRHLALDY	QLDPYMKKLAAELDQLVIDSAVEKREMERK	0.937062	0.558242	0.747652
HLA-A0301	RLLLAGAEAK	GWETRGDRKARKPLVEKKRRARINESLQEL	LENAEVLELTVRRVQGVLRGRARARAAAGG	0.896997	0.597696	0.747347
HLA-A0201	GLPPARPAL	DLAPRVSYTPAMRMTSTDYSLSATTHWHVG	WTGTAPPRYRAPDSPAPTHCPLI	0.918199	0.576216	0.747208
HLA-A0301	RLLLAGAEAK	GWETRGDRKARKPLVEKKRRARINESLQEL	LENAEVLELTVRRVQEREQLQAEASERFAA	0.894677	0.597696	0.746187
HLA-A2402	VFMLFVSHL	PALRAWCRTIAGDLVWAFGGKKTLAFCVTK	SGLMFFNL	0.615458	0.876167	0.745812
HLA-A0301	FVHIPYLIHK	TGISNQVSHLFLFLVPFCVICLPDRHDFNI	CSLLFHLLPTLPLVICT	0.96416	0.527137	0.745649
HLA-A0101	NTEKPLGFYW	REFFDSLNEAIMRLVAVIMCHRLATPLLLG	RVAASTHHRSGDLFKFCHPTHHLQVPGREQ	0.971723	0.519416	0.74557
HLA-A1101	HMFPREIVSR	DRKEVVNIQTWINKPDVKHHFPCKEVKESG	KGLAYIQSRQALNSVVKITSKKKHPELITF	0.723475	0.767458	0.745467
HLA-A0201	MLVSTEARL	MVGKGAKG	REGTGVPSPAPRTSCQLLGRLRKAGTARAP	0.713491	0.777379	0.745435
HLA-A0301	KLVDKAPLRQH	SDTGTGGCLVVHVVSCEEEFQQQKLDLLWQ	LICGPVKVAGAPGTLMTAPEYYEFRHTQVC	0.911843	0.578897	0.74537
HLA-A0201	KMLIIVVSAV	DFIHMIQMLYYVKDIPATLKFFHSLLGTNA	AGTSCGKSTDHAFPRMTSASISHQMTSLRC	0.608477	0.881918	0.745197
HLA-A1101	GSFQRKGIRR	LLVRLWREGAPGPWRPYIESGRTAGCLGGE		0.916262	0.573628	0.744945
HLA-A1101	TTHGGPRGYAR	PLDLIVSRCRLPTLACLGPGPGAPSRSADG	RLHGARGPFGGRGVLLGWGMGGSRGWQPGR	0.923939	0.564972	0.744456
HLA-A2402	IFLTKFGVL	LKIHLLLKEWRLMKLLTLMTWMNILSYYMK	L	0.911858	0.576809	0.744333
HLA-A2402	NWTLAPAGWTW	MVSLRLRS	RIWRKM	0.871603	0.61668	0.744142
HLA-A0301	KVYDITVGW	NRLHPAEEGDFWAESSMLGLKITYFALMDG	MPACRYLPRYPQSPLSHLIWFSDSRHQRAA	0.956508	0.531751	0.744129
HLA-A0301	TTDQVPRQK	MASGRRGWDSSHEDDLPVYLARPG	YGGMFCNVEGAFESKT	0.882198	0.606035	0.744117
HLA-A0201	TLARGDPVL	TVRQKLQDETNLRLEAENNLAAYRQEADEA	EEDPRGGGSGTPGAAGPTAGPCGA	0.930581	0.557046	0.743814
HLA-A1101	ASPPPGRPPR	LGPTAVGARGGEAGGQSPRPQQRPEGRVSP	RGRQVGAEGRVRLGGGEGFVVSSPRGLGIQ	0.940475	0.546763	0.743619
HLA-A0301	GTVGGRHRLPK	GKSHSPLSPHVPTVHSTDACWVPAGCWLWG	LREFTFQL	0.789317	0.697649	0.743483
HLA-A0101	TSSPSKENQHY	LPCIMTVILSQVSFWLNRESVPARTVFEEN	LQHRGDHLSHQPGQGH	0.861331	0.625608	0.743469
HLA-A1101	LLLPSFHLR	EPGEDPRVTRAKYFIRDEFLDQHCQWRWAS	CGH	0.786646	0.700107	0.743377
HLA-A1101	AQAPCPRPR	AAATPTSPASSALALPATWERGVSSQCTPT	RASGPGTLSATFCLRLWDCSWPRAWPALRS	0.786968	0.699499	0.743233
HLA-A2402	NWPRANITLQL	LPGFGGPECEKLLSVNFVDRDTYLQFTDLQ	SCTRAMCVSATTQAATPALPSTVLRRSTMG	0.935236	0.551188	0.743212
HLA-A1101	FSLPSRLPR	RAPESEGPCTGARDAVKVLPFFHVNTIASR	FPFSQPS	0.693991	0.792258	0.743125
HLA-A1101	IVVWDCIPK	TGVKEAVTTLIASGVSIKMITGDSQETAVA	LPSQSQEKK	0.892296	0.593517	0.742906
HLA-A1101	SQHPLTLLLVK	QKITFQFNLHILSLKHLVTLRLNLCLVQTQ	CYLLQLSSYFMRPQLLLVLKYCYNLPFRLL	0.832164	0.652945	0.742554
HLA-A0301	LTNWRTTSKK	GFHTPLLISFSKLWERTVPTVTTSHCPRKY	LIRQHGIYYIVGPC	0.910096	0.575005	0.742551
HLA-A0101	MADSAWTW	CTCPRGFYGLRCEAPTVRRGWTGAACSHAA	ATPCAAAAAPASRVLAASTTWTTARAAPAL	0.884413	0.600416	0.742415
HLA-A0301	AVWVSEGKAK	HLFTATINLNSANDSWFGSLKDTIQHQQGE	TQNKEESYDFSKSYEYKSNPSAVAGNETPG	0.896003	0.58873	0.742367
HLA-A0301	VVRISLEGLLK	SKLNVTSTWNLASPLLSVSVDGTQRTVQVS	SRILVSTCVANT	0.93991	0.544222	0.742066
HLA-A0301	KLTDKPLQGTK	CGSASRPGHVLPLQAALRPDPKTQTLPCKA	SNPFPASTPARPPATGLCPQLAPPLGPPAL	0.899097	0.584741	0.741919
HLA-A2402	ALIQKLVRW	STVSLSAESGKSEKGQPQNSKKQSPPKKNR	VGK	0.888227	0.59528	0.741753
HLA-A1101	VSIFIYKRK	QRKLVEEIGWSYTGKHITYIMRFSRNFYCF	LCSTTHHVNLAKWIVRLINRYIKYKTISYG	0.952623	0.53052	0.741571
HLA-A1101	GSQNFGKSGK	ERTFTGGTAASPPRGPLHTTDPQGSPQAQT	FTGAMGKAQSPQKGATEPQAGFRCPQSPRA	0.911048	0.570987	0.741018
HLA-A0301	GSYPSSAIYR	EDNGILLYNGDNDHIAVELYQGHVRVSYDP	W	0.777681	0.70427	0.740976
HLA-A1101	AVLVPQPPEY	LPSDGVGLSCPGWSAMAQSQLTAASASQVQ	LGL	0.950462	0.531393	0.740927
HLA-A0101	GSAPPAGPRY	SRGHLIVQLQELLHHWVLWSAVKSRWVIVA	SSGLIPTSRCCWTSSTT	0.767645	0.714066	0.740856
HLA-A1101	MSMPSLPPRR	KIISNASCTTNCLAPLAKVIHDNFGIVEGL	LWMAPPGNCGVMAAGLSRTSSLPLLALPRL	0.796657	0.684759	0.740708
HLA-A2402	YYFAWTLGFGF	YNIDEHFQATASWPTKIIYLYISLLAARPK	RGYDENGAARWDLISNLRIQQIEMSTSFKM	0.780342	0.700661	0.740501
HLA-A0201	VLPGHLRAA	RGHGVLLDGLGAQPGRLLRPSRHHHPGHLC	AAPPRAQVRAAHTARGAAAAGDTRGRPWDP	0.538667	0.941846	0.740257
HLA-A0201	ALPPLPTVA	PTNTQGKPLCPWAPPGSPYLYWGREKPSHL	YSALLSSQGGSSCALSSSLLLLALF	0.770226	0.70984	0.740033
HLA-A1101	GAWVSTEK	SSSASSEASETCQSVSECSSPTSVSSGSTM	RRKEKREPDPNGGGPTTASGPPAAAEEAQR	0.870005	0.609933	0.739969
HLA-A1101	SSQAVPGPLR	RPDTNIQVLLDLKYNLSAEGISCITCSGEA	CPGPKDCWSERCRIQGPHQCQTSGKSHSPL	0.973447	0.506479	0.739963
HLA-A0201	FLGMGPGVLEL	AHRGLPWGACCSSSWFCCCCSAQVWELGWG	AGLQGTHAPSQGQTN	0.893494	0.586104	0.739799
HLA-A1101	RSDAVQKVVK	GPPSKPPDEEHRLEDAETESQSAVSETPQK	LLSNKRSQAVGILMSSLHLDMKDIQHAVVN	0.804648	0.674536	0.739592
HLA-A0101	GTECTFGHDRY	IVPAIKPFDHYDFSRAKIACNLAWLVAKAF	PHDGLYCRNGQYRKSNCVCSAVFSFFSSHR	0.75702	0.721718	0.739369
HLA-A0101	YSSKFLGSY	ENKPPAHIAASHLSEPAKPAHSQNQSNFSS	TSYDYLKRNVKW	0.837489	0.64098	0.739235
HLA-A0201	SLHPKAQHL	LEEDVRFIVDETLDFGGLSPSDRSHPLAIC	LLLPDRLPQSGGEPGPVGEQQPVRRPEQPS	0.774792	0.703411	0.739102
HLA-A1101	RLFHHSLLLR	SVVIPVTGDSEGATVQVKFSELLWGGKGHR	MSSLLSNALLPADTS	0.733787	0.744399	0.739093
HLA-A0201	FQFNLHILSL	NAPRACFQGPLLIPPLRFLIMRLVKFQKIT	KHLVTLRLNLCLVQTQSQHPLTLLLVKCYL	0.888111	0.58995	0.739031
HLA-A0301	RLISRIHKVK	MMLKGIT	TFSEACLMVRKPALELLHYLKNTSFAYPAI	0.838126	0.639925	0.739025
HLA-A0201	SLHPKAQHL	LEEDVRFIVDETLDFGGLSPSDRSHPLAIC	LLLPDRLPQSGGEPGPVGEQQPAHPPPSDP	0.774035	0.703411	0.738723
HLA-A1101	CTAQKAVGK	KNWAKAAAFVTSPPLSPDPTTPDYLTSLLA	DNFTLIPEGVNGIEERMTVVWDKAVATGKM	0.828445	0.648046	0.738245
HLA-A0201	YLNITIDYTV	VFFLFPRSIDVKYIGVKSAYVSYDVQKRTI	PTVIAEEMSYMYDFCTLISIKVHNIVLMMQ	0.746115	0.730325	0.73822
HLA-A0101	FEELQSAFY	IPFLEQNNFSPNTRTQKGKKNLGREFAGLY	R	0.69067	0.785678	0.738174
HLA-A0301	RAAPALTAAR	DSAWTWATPCAAAAAPASRVLAASTTWTTA	VWRAAARTAAPARWASAAATAASARTRAPR	0.616033	0.859695	0.737864
HLA-A1101	KTSLESINSR	MVAAK	LQLVMKSGKYVLGYKQTLKMIRQGKAKLVI	0.853212	0.622258	0.737735
HLA-A0201	LLLAGAEAKL	WETRGDRKARKPLVEKKRRARINESLQELR	ENAEVLELTVRRVQGVLRGRARARAAAGGS	0.944102	0.530821	0.737461
HLA-A1101	TTERNSLVK	LAIRQLASVILKQYVETHWCAQSEKFRPPE		0.807749	0.667098	0.737423
HLA-A0201	LLEGEVLPGV	GGGDTATCCAKWNTEDKVSHVSTGGGASLE	DALSNI	0.916514	0.558306	0.73741
HLA-A0201	LLLAIMSAV	LFTSLAFMLVEGNFVLFCTYTLGFRNEFQN	PFLILVALMESNLIITYAVAVAAGISVAAA	0.652127	0.82267	0.737399
HLA-A2402	LLPTLPLVI	FCVICLPDRHDFNIFVHIPYLIHKCSLLFH	CT	0.855909	0.618336	0.737122
HLA-A0201	LLLAGAEAKL	WETRGDRKARKPLVEKKRRARINESLQELR	ENAEVLELTVRRVQEREQLQAEASERFAAG	0.943321	0.530821	0.737071
HLA-A1101	RVHVPGHRR	GRARARAAAGGSERALRCRLHPVHARGAHV	YRRCRAPEPSARVHAAA	0.754544	0.717306	0.735925
HLA-A2402	YLLPKKMEL	TFVLSITATTQALALIELYNAPEGRYKQDV	TDDQAKYLGLNKNGPFKPNYYRY	0.773916	0.697078	0.735497
HLA-A0201	GLSPLTLLIL	KSTSSAMSGSHQDLSVIQPIVKDCKEVTHQ	VSSHH	0.909789	0.560385	0.735087
HLA-A0301	ALIPGTAARRR	AAGDTRGRPWDPARHPTRTRCPRRLRAAER	LHAVPVHGHVGLRGAGGVTGPLPGHGLQLP	0.989458	0.480696	0.735077
HLA-A2402	QLPSLSYSF	QCRPSQCCPLTAPAEVEWPWSPHQVILPKA	SSPCSSGSP	0.754654	0.715305	0.73498
HLA-A1101	SAFADFGK	FQFEIWENLDGNFSVSTILEKPQNMMVVGQ	IW	0.96505	0.504603	0.734827
HLA-A1101	AGFVCHIEK	MSGRGDGGQQQLLHSKFL	NEVETNADTFCLYGVFLFLFFFSFSLFFFF	0.898902	0.57053	0.734716
HLA-A0301	RIQNKKVDISK	LATNTSAPDLKNVRSKVGSTENIKHQPGGG	VSSKCGSKANIKHKPGGGDVKIESQKLNFK	0.98994	0.479481	0.73471
HLA-A0301	RTAPGHPR	PAEAAPCPAEPERSQSAALEPSSSADAGEF	SSPGPGPETAVPQLLPVHFPQGTGPGSGSS	0.97557	0.49358	0.734575
HLA-A1101	RTTSKKLIR	PLLISFSKLWERTVPTVTTSHCPRKYLTNW	QHGIYYIVGPC	0.704011	0.764534	0.734273
HLA-A0301	AVSGELSRR	QVPPGWKQWAREFSEQLSSSRGDGRRVECF	LGSAGGADRHGCAGGNSTGADQPRPV	0.681986	0.786547	0.734267
HLA-A2402	TFIKSTICL	KFIQLSEFGFGQVIIVSEEPWKENISCSST	KMGCPGWPQVILPPWSPKAQRLQV	0.572437	0.895852	0.734145
HLA-A0301	AVSGELSRR	QVPPGWKQWAREFSEQLSSSRGDGRRVECF	LGSAGGADRHGCAGGNSTGADQPRAVHHQR	0.681225	0.786547	0.733886
HLA-A1101	AVLTPFER	FCTTLPPSFLRVDDRATSSTTDSSRAVSEM	VRRDPPVCTVSYQRF	0.971479	0.496244	0.733861
HLA-A0101	GTVPGGSLY	YCLEVQTRCPFILPDNDEVIYGGLSSFICT	TSLRWFCFLV	0.756464	0.710933	0.733698
HLA-A0201	AVQELHTYV	HQFPSHDLPSVLAKFSLPVSLSEFRNPLAP	CLMASPSEEEPRPREDDVPFTARVGGRSLS	0.618486	0.848662	0.733574
HLA-A0301	KILLVILPPR	MRALSQEITRDFNLLQVSEPSLENKVQRRK	GSCCRSIVEDHISAFCLHIGIQIRVCCVCV	0.986489	0.479769	0.733129
HLA-A2402	SYSFVGGVI	PDGVMNSEMHCTGDPDLVSEGRKSFPSIHS	GLIFAYICYRQHYPPLANTACHKPYVSLRV	0.677142	0.789107	0.733125
HLA-A1101	RNFLGNNPK	QLQDQGSKMLLDSVLTTHERVVQRFECYVC	QSS	0.529038	0.935451	0.732244
HLA-A2402	KFWSGEHVW	HLFTCSEDGSLWHWDASTDVPEKSSLFHQE	SMHACPCYNFIYRETNSFI	0.481379	0.98164	0.731509
HLA-A0201	SLYLNNNEL	AAACTCAGDSLDCGGRGLAALPGDLPSWTR	TAVPSLGAASSHVVSLFLQHNKIRSVEGSQ	0.800632	0.662069	0.731351
HLA-A0101	APQGSDDLLKY	ELALATNIPKGCAETAVRVHVSYLDGKGNL	YHQVTRAVLGDDPQLMKVALQDLQTNSKIG	0.829657	0.63303	0.731343
HLA-A1101	YSRDTWLKK	LYALKRHLLKYEAIYPETAAILGYCRGEAV	ARVVRLGEVPYKMVKGFSNRARKARLAEPQ	0.661839	0.799991	0.730915
HLA-A0201	HEDDLPVYL	MASGRRGWDSS	ARPGTTDQVPRQKYGGMFCNVEGAFESKT	0.685584	0.776168	0.730876
HLA-A2402	IWSVNQHKI	EKYNRNGVNALQLDPALNRLFTAGRDSIIR	HI	0.950309	0.51109	0.7307
HLA-A0301	SMSSWPWTSR	CDLERWRGWRKRGRASRTRWPATCRSTRTC	SPPTGSC	0.671507	0.789448	0.730478
HLA-A0101	KMELTDDQAKY	ITATTQALALIELYNAPEGRYKQDVYLLPK	LGLNKNGPFKPNYYRY	0.926048	0.534884	0.730466
HLA-A1101	SINQTNSTK	WTSRLPHCVFNQDSFEHALEGEFQNEKKKS	QGQVFEYLYLDT	0.803842	0.657087	0.730465
HLA-A1101	GQQQLLHSK	MSGRGDG	FLAGFVCHIEKNEVETNADTFCLYGVFLFL	0.806222	0.654521	0.730371
HLA-A2402	YWLKPPKLI	VLKYCYNLPFRLLMLTPCLKLFFQLCPVIQ	KLVLQCCISLYQILLQVKTCCTLHLYQFLM	0.932149	0.52792	0.730035
HLA-A2402	RFWKTGFII	GSCASLGRVSSKVFFTLFALLGFFICFFGH	MGFFFYILITRLTPIKYDVNLILTAVTGSV	0.718291	0.741302	0.729796
HLA-A2402	TFQFNLHIL	YNAPRACFQGPLLIPPLRFLIMRLVKFQKI	SLKHLVTLRLNLCLVQTQSQHPLTLLLVKC	0.842191	0.617165	0.729678
HLA-A1101	KVGDILAPAR	TFRPTMEEFKDFNKYVAYIESQGAHRAGLA	PSISLRRGPADILGPSSASPTGVACARGMC	0.975591	0.483223	0.729407
HLA-A1101	ASSMYILFH	LPQELFAVDPTTVSQGLKDEVLYKCRKCRE		0.712631	0.745989	0.72931
HLA-A2402	SFPALFPPRL	AGGRVHLAQRLGLGNGHYRKKMNVPRPQTA	ASPAPRPLVSGLFFLGERRWRWGGTWRRGR	0.657118	0.801328	0.729223
HLA-A1101	GLAHPAGLLR	AHLGPAVQAVPRTRGLPGEAPGRAALPQQA	GWPRPSPAPQGGL	0.929963	0.528278	0.729121
HLA-A0101	YIKYKTISY	FVSIFIYKRKLCSTTHHVNLAKWIVRLINR	GLSINKFGNVGLIDIHPNCI	0.946165	0.511126	0.728645
HLA-A0101	MASFPLPSSY	GIVMEGYLFKRASNAFKTWNRKKPDHIRYQ	SSFLFGTRKLIINLHSSWITCNG	0.784162	0.672415	0.728289
HLA-A1101	RLWDCSWPR	SSQCTPTAQAPCPRPRRASGPGTLSATFCL	AWPALRSCWSTCAAVATPRMLGLACWLGPR	0.506568	0.949737	0.728152
HLA-A1101	ATGIATDPYR	KFTGAMGKAQSPQKGATEPQAGFRCPQSPR	DLPSPGTVRA	0.939916	0.516387	0.728152
HLA-A1101	SSGLIPTSR	ELLHHWVLWSAVKSRWVIVAGSAPPAGPRY	CCWTSSTT	0.878356	0.575363	0.726859
HLA-A1101	STRTTGDWQK	APWRLLLAPMLVMFFGRQLHTLFLVALVMS	FGWMNLKISSTSYPQVLSKWIMEMCQSEKH	0.726232	0.727432	0.726832
HLA-A1101	SLLACTAQK	HYWSKNWAKAAAFVTSPPLSPDPTTPDYLT	AVGKDNFTLIPEGVNGIEERMTVVWDKAVA	0.662595	0.789594	0.726095
HLA-A0201	GLHIGLLQI	PLAAGFRLSPPCLPLSSQAERLFPLRPPLR	CSFCRPFSLS	0.802507	0.649122	0.725814
HLA-A0201	DLYRAPVYL	LLSLILVSVGFVVTVFGVIIFKVYKWKQSR	TTDSRRSDPLLKKPGAASPLASRQNTLRSC	0.870609	0.580878	0.725744
HLA-A0201	ALAPGSWQGV	PSSFTSACLWSSNNVPGTILGTGVEKWPVQ	VRTHSHTAVKPRGSGPPGCSGRELTSH	0.775253	0.675069	0.725161
HLA-A0201	ALVSVVGNV	SGSCSQGSGILHYAHGDSQQTHLLKQEAPW	LVRKRTHRVLVLKSRDRALI	0.692697	0.757592	0.725145
HLA-A2402	TYSPHRVHGAW	FELMGEVTIRCILGQPSHWNGPLPVCKGKE	RCQAPGSQEF	0.64031	0.809891	0.7251
HLA-A0201	RLGVSIDPLRV	MASNFNDIVKQGYVRIRSR	AVRRFDCLSLEPASLEGGRRVPGRAPENCA	0.927347	0.522302	0.724825
HLA-A2402	KLLEIPALL	GAEHLWLTRHLRDPFVKAAKVESYRCRSAF	LASCLG	0.827593	0.621728	0.72466
HLA-A1101	SLCSFPGTAR	SGGSAGLLQQILSLKVVPRVGNGTLCPNST	PAPAHCAPRRRRCRAVGAPSLGGVPGAQPA	0.746913	0.702062	0.724488
HLA-A0101	ASDTILKV	TPELVPAQDLVCDNASWEQNTNHGAAGVPF	SFN	0.99662	0.450766	0.723693
HLA-A0201	KILQTGVGSV	VSANVQNVTTEDVEKATVDNKDKLEETSGL	SNRRGAVCSAICSAVWVLANTVRTEAGPAG	0.871951	0.574903	0.723427
HLA-A0201	KMDPLLCSV	VTLIIAVDWLLCSFHKIPPACSSCQQSASI	PSLPVFLPPVSSPGSLEIKTG	0.594228	0.852564	0.723396
HLA-A1101	KARDIGYILLK	RFYGHRQYLECEVFRVEGIKDNLDDIKRII	MEKMENLCHLCCVTLWG	0.933648	0.512189	0.722918
HLA-A2402	SWPVWPTF	SDPRAGDVEEDASQLIFPKACYSRKSFISL	AQRLLRSPRL	0.996464	0.449361	0.722912
HLA-A0301	RAAPQRLRY	SARQGERGLPVPRGTACVPSVAHRRLPGAE	LSL	0.74668	0.698715	0.722698
HLA-A2402	TWIILTQLL	IEAHSEAKTSGLLWAGLALLSIQGGALAWL	RVGNFFSSSTRNQSNSTLMCSNTTS	0.88467	0.560686	0.722678
HLA-A0301	AIYMMEPGVLR	VSDSRLEASSSQSFGLGPHRGRLNIQAWRT	SRTPIHGFRWTLGTPPASRVLSHRAGTLSG	0.990178	0.455075	0.722626
HLA-A2402	MFLLPKQNHL		WVFPEKPVPAPKASWLEETRPNPFAALTGG	0.784004	0.661091	0.722547
HLA-A2402	SWPRAWPAL	PTAQAPCPRPRRASGPGTLSATFCLRLWDC	RSCWSTCAAVATPRMLGLACWLGPRSRQST	0.561612	0.883464	0.722538
HLA-A1101	MDFPFEVTK	LGEKTKLNPFKFVGLKNFPCTPESLCDVLS	PLSLLP	0.843552	0.601072	0.722312
HLA-A0301	KVRLPPVSLVR	GGSAKMLMFVNISPLEENVSESLNSLRFAS	TRGWL	0.950219	0.49406	0.722139
HLA-A0101	ASDTILKVSF	TPELVPAQDLVCDNASWEQNTNHGAAGVPF	N	0.919392	0.524594	0.721993
HLA-A1101	AIYMMEPGVLR	VSDSRLEASSSQSFGLGPHRGRLNIQAWRT	SRTPIHGFRWTLGTPPASRVLSHRAGTLSG	0.984934	0.458884	0.721909
HLA-A0101	ATESTISFVRF	FSRLGGDEDGYEEEEDENSRQSVGKSPRSR	WNCANSVPFHG	0.979387	0.46435	0.721868
HLA-A1101	KLSTTEIPCK	RDFAYDSVPSCHSIYMRQEGFLAHPSRTEV	YRSE	0.558515	0.884443	0.721479
HLA-A0101	ITAEDFRKY	MEQIVEEEEKFKKQWEEDWGSKEQLLLPKT	EEGFDPYSMFTPEQIMGKDVRLLRIKKEGS	0.832597	0.609552	0.721074
HLA-A2402	SFTPRPTAL	SGIGASCVSLLTLSHHSEGIPTSRSPRTPS	RKWPGPNTIPETSSTFTSG	0.722444	0.719432	0.720938
HLA-A1101	RLPPVSLVRTR	SAKMLMFVNISPLEENVSESLNSLRFASKV	GWL	0.817129	0.624055	0.720592
HLA-A2402	VHTEALLQW	TITRLNPATEYEISLNSVRGREESERICTL	KAPVGEVENYVIVLTHFAVAGETILVDGVS	0.637891	0.802801	0.720346
HLA-A0201	ALQDFAGESEV	VRINQLYEQARWAILLEEIDCTEEEMLIFA	DEIEAALSNLEVTLEGGKADSLLEDITDIP	0.857733	0.582947	0.72034
HLA-A1101	RTSPHTWKAR	TVDTYDGRGDSVVYGLRSKSKKFRRPDIQT	S	0.671302	0.768942	0.720122
HLA-A0301	SLNGKILSSRK	SFQEFLQRQVWLTTLTRGQLPKKVLNCFLW	SKI	0.919996	0.519647	0.719822
HLA-A0301	LLLSWIKTR	VMPYVDILFGNETEAATFAREQGFEKVKSL	KKLLIPMELEMHLLEVFCLNWSLTSL	0.89431	0.54483	0.71957
HLA-A0301	NLQQVTLSY	LPDDCTIGYIVEALLGVPLIRSGLFHSHLE	GMFENKRNAVHVKGPFSVEADPSRFRSIHC	0.887015	0.551793	0.719404
HLA-A0101	STEGMSSVFF	GVVNVLPGSGSLVGQRLSDHPDVRKIGFTG	NKGENCIAAGRLFVEDSIHDEFVRRVVEEV	0.933176	0.505578	0.719377
HLA-A1101	TSSSTPLMR	MSVPRAWWTKTPSNSFTRSSSLREMPPPMH	TGTGPSTLRTLWLASPSCCGAQSTRSSSGP	0.808187	0.629073	0.71863
HLA-A0301	SVNSKRASK	TRAAKLRACQPNATHQPECATWQRCPTSGF	TKHCRTQSAGKWTQG	0.811209	0.625594	0.718401
HLA-A0201	EMIKWLFGL	AFPQSSRGHTHPPTHQEGNQERVPQRRLTA	ENSSVLI	0.609159	0.82746	0.71831
HLA-A0201	FLQLLALRL	GDLRRQEEQRSRLSRARQNLSQVPEADSVS	ALEDGCGPGPGPPRELSFTKSSQAVRAVRD	0.833875	0.601929	0.717902
HLA-A1101	RTRWPATCR	HEANDYRRQLQSLTCDLERWRGWRKRGRAS	STRTCSMSSWPWTSRSPPTGSC	0.481059	0.953836	0.717448
HLA-A1101	ILPPWSPK	PWKENISCSSTTFIKSTICLKMGCPGWPQV	AQRLQV	0.86681	0.567183	0.716996
HLA-A0301	HLAEVPYLR	EQLLNLPVNCPFPRPSPGLPAECHSPAGVC	ILCQLEKGFQDQALQDTECGKVDTRFLFPS	0.854092	0.579599	0.716846
HLA-A1101	ATMVGHAWR	CRPSQCCPLTAPAEVEWPWSPHQVTVSPAP	RRKGSAAYVCLAMGGTCAMLASASATPAGT	0.711454	0.722146	0.7168
HLA-A1101	LTNWRTTSKK	GFHTPLLISFSKLWERTVPTVTTSHCPRKY	LIRQHGIYYIVGPC	0.791475	0.640696	0.716085
HLA-A0201	NLFLIGWKL	KAGDASIFLILTTTGHYSLFPLLFTAPEKK	STCLAWGLWKSAVNLYSLSPPGR	0.714673	0.717218	0.715946
HLA-A2402	IYLFSVSTETL	PVNRRGSRWSGGMTFAGRRAPFNPLQRYIF	PRS	0.928992	0.502541	0.715766
HLA-A1101	SSLNLNVPAGK	LKMSPHSLTCVTSSHWDRPYSREVAAFPLV	AWASSYPDGCTLLAS	0.823032	0.60846	0.715746
HLA-A0201	FIYRETNSFI	DVPEKSSLFHQEKFWSGEHVWSMHACPCYN		0.612382	0.818668	0.715525
HLA-A0301	RLGLGNGHYRK	MGECAGGRVHLAQ	KMNVPRPQTASFPALFPPRLASPAPRPLVS	0.952855	0.477867	0.715361
HLA-A0201	HILSLKHLV	CFQGPLLIPPLRFLIMRLVKFQKITFQFNL	TLRLNLCLVQTQSQHPLTLLLVKCYLLQLS	0.867624	0.56271	0.715167
HLA-A1101	LALPATWER	ATAASARTRAPRAPVLTAAAATPTSPASSA	GVSSQCTPTAQAPCPRPRRASGPGTLSATF	0.706987	0.722931	0.714959
HLA-A0201	TMWKVSALL	RLGLWPRCFLIFPQLRILLLGPQESNNSTG	FVLGSASLWVLAEGGKL	0.671285	0.758588	0.714936
HLA-A0101	DLDETINILF	QDPSTATREEIDWTTNELRNNLRSIEWDLE	CGVCAIRDK	0.918363	0.510815	0.714589
HLA-A1101	CIAYVALLTK	VAYVLDINSIDNLYSKMLAKVKQVHKEVLN	VDDCSEVLQDNFLNMSRSMTSQSRVMNVHK	0.787145	0.64097	0.714057
HLA-A0301	VLAEGGKTQRK	LLGPQESNNSTGTMWKVSALLFVLGSASLW	WLPAVADGDERAETCWNARAWYSRLSRGAR	0.982253	0.445765	0.714009
HLA-A0301	KLPSQSQEKK	TLIASGVSIKMITGDSQETAVAIVVWDCIP		0.876216	0.55153	0.713873
HLA-A0101	SDDLLKYY	ATNIPKGCAETAVRVHVSYLDGKGNLAPQG	HQVTRAVLGDDPQLMKVALQDLQTNSKIGA	0.997316	0.429393	0.713355
HLA-A0201	RLLLAPMLV	RWYPVPQREMDRRKGDRTLPVRFGNVEAPW	MFFGRQLHTLFLVALVMSSTRTTGDWQKFG	0.682751	0.743149	0.71295
HLA-A1101	RALIPGTAAR	AAAGDTRGRPWDPARHPTRTRCPRRLRAAE	RRLHAVPVHGHVGLRGAGGVTGPLPGHGLQ	0.805043	0.620833	0.712938
HLA-A1101	GGADAPSVSK	FPSSLIQANVTVGTCSGFCSQKGSRAKRTT	PTRVAGGRLRCLIQPSC	0.979225	0.446218	0.712721
HLA-A0201	TMWKVSALL	RLGLWPRCFLIFPQLRILLLGPQESNNSTG	FVLGSASLWVLAEGGKTQRKWLPAVADGDE	0.666777	0.758588	0.712683
HLA-A1101	FTPRPTALRK	GIGASCVSLLTLSHHSEGIPTSRSPRTPSS	WPGPNTIPETSSTFTSG	0.843527	0.581103	0.712315
HLA-A1101	ATAASARTR	TARAAPALTAARVWRAAARTAAPARWASAA	APRAPVLTAAAATPTSPASSALALPATWER	0.834556	0.589862	0.712209
HLA-A1101	LLLSWIKTRK	VMPYVDILFGNETEAATFAREQGFEKVKSL	KLLIPMELEMHLLEVFCLNWSLTSL	0.890173	0.533156	0.711664
HLA-A2402	TLPVDQAVF	GLKPDTTYDVKVRAHTSKGPGPYSPSVQFR	AKNFHVKAVMKTSVLLSWEIPENYNSAMPF	0.811144	0.611739	0.711441
HLA-A1101	AAFWYVTNRY	YTLFGLQAIYVTALYITSWLLSGTWLSGLL	HKS	0.682714	0.739207	0.71096
HLA-A0201	FIVTRQLLRV	WLTWWVYSWDIMEPVTYFITFANSMVFFAY	GNFFSSSTRNQSNSTLMCSNTTS	0.804152	0.616666	0.710409
HLA-A1101	VSSPGSLEIK	PACSSCQQSASIKMDPLLCSVPSLPVFLPP	TG	0.862698	0.557949	0.710324
HLA-A1101	ETNIREYNK	ILGNVSEFQRVVEVLQDSVDFDIDVNASVF	AIRNYTRFDDWYLWVQMYKGTVSMPVFQSL	0.755882	0.664456	0.710169
HLA-A1101	PTSGFSVNSK	AASEETRAAKLRACQPNATHQPECATWQRC	RASKTKHCRTQSAGKWTQG	0.846498	0.573836	0.710167
HLA-A2402	LAPQVFLNF	ICFCLLGITCAIPVKQADSGSSEEKQKQNL	S	0.645797	0.774485	0.710141
HLA-A2402	SWLEETRPNPF	MFLLPKQNHLWVFPEKPVPAPKA	AALTGGSNGFCEKKFPRL	0.992881	0.427195	0.710038
HLA-A1101	RVPDCLQWVGR	LASPAPRPLVSGLFFLGERRWRWGGTWRRG	VGGCAWALILCAGPRTQAWGSGLPCWGRYL	0.71166	0.708172	0.709916
HLA-A0301	RTPSSFTPR	TVFGSGIGASCVSLLTLSHHSEGIPTSRSP	PTALRKWPGPNTIPETSSTFTSG	0.75505	0.66475	0.7099
HLA-A1101	EVHTGSVRRK	MLRAGAPTGDLPRAG	AYSEERPLGPE	0.814944	0.604488	0.709716
HLA-A2402	SYPSHSPL	PLHYAPYHRSSAQPHFPDGTLFDEQYSQTA	ARGALSQHVLHKPVCAFCEVRKL	0.970211	0.448546	0.709378
HLA-A1101	SPHQVILPK	ILEELPQQGPQCRPSQCCPLTAPAEVEWPW	AQLPSLSYSFSSPCSSGSP	0.940822	0.476698	0.70876
HLA-A0201	GLSTTVTTA	VPSFSPAKSATSVEVPPPSSPVSNPSPEYT	AGSPAENSQQLPCMRNTHVPSSSVTHRIPV	0.771607	0.64582	0.708713
HLA-A1101	RLLMLTPCLK	LVKCYLLQLSSYFMRPQLLLVLKYCYNLPF	LFFQLCPVIQYWLKPPKLIKLVLQCCISLY	0.833004	0.583842	0.708423
HLA-A0301	KVLSREYRK	GCGLLQKREQSRGTLGCYAGLQWCSQPRSR	IKFVLDLELARSFGGEGIEPI	0.590343	0.825929	0.708136
HLA-A1101	SASCHSGPLK	PRTAPGRLHLLVLQAAQAIVESPPGVQNGA	SPM	0.704354	0.709848	0.707101
HLA-A1101	VTTSHCPRK	FHCPQQPQWCGFHTPLLISFSKLWERTVPT	YLTNWRTTSKKLIRQHGIYYIVGPC	0.732481	0.681691	0.707086
HLA-A1101	HTPLLISFSK	QNMWMLYWEKDINTSELSFHCPQQPQWCGF	LWERTVPTVTTSHCPRKYLTNWRTTSKKLI	0.741168	0.671954	0.706561
HLA-A2402	YHTEQHWTL	CAAHSAVAMGKHVYIFGGMTPAGALDTMYQ	LKFDTLLPPGRLDHSMCIIPWPVTCASEKE	0.602135	0.810089	0.706112
HLA-A0301	SLSGKGKKK	RKVVEECKLIHPSKLNEVEQLLYYLQNRRD	KNQASLKIHLLLKEWRLMKLLTLMTWMNIL	0.890299	0.521922	0.70611
HLA-A0301	CIAYVALLTK	VAYVLDINSIDNLYSKMLAKVKQVHKEVLN	VDDCSEVLQDNFLNMSRSMTSQSRVMNVHK	0.847865	0.563684	0.705775
HLA-A0301	VVQQQKLKKK	PAKSKTAAAASEKNRGPRKGGRVIAPKKAR	SESGRRSNMTW	0.941015	0.470422	0.705719
HLA-A0301	RVHVPGHRR	GRARARAAAGGSERALRCRLHPVHARGAHV	YRRCRAPEPSARVHAAA	0.714948	0.69571	0.705329
HLA-A2402	AWWTKTPSNSF	RGWTSCRPRPSSPRRSCSLSTGALRMSVPR	TRSSSLREMPPPMHTSSSTPLMRTGTGPST	0.757673	0.65283	0.705251
HLA-A0201	LLIPVADGESI	EQGEPLEKLNLRGCEVVPDVNVAGRKFGIK	RPMDGCLHVGIEGQNHGRQLLPARGPQHPF	0.957946	0.452342	0.705144
HLA-A0301	ALPPLPTVAY	PTNTQGKPLCPWAPPGSPYLYWGREKPSHL	SALLSSQGGSSCALSSSLLLLALF	0.780589	0.628926	0.704757
HLA-A1101	MALLPHLRK	NGVERAGPEQELTRLLEFYDATAHFAKGLE	HSFLPVL	0.765414	0.643812	0.704613
HLA-A0201	RLGGGEGFVV	QRPEGRVSPASPPPGRPPRRGRQVGAEGRV	SSPRGLGIQGRGAGRGEGEGPRPAPERRKP	0.940229	0.468344	0.704286
HLA-A1101	TVDEVQAVNPR	NLNFSTRYKFYFYAQTSAGSGSQITEEAVT	ISNLTAAAAETYANISWEYEGPEHVNFYVE	0.913004	0.493552	0.703278
HLA-A0301	RVAASTHHR	IMRLVAVIMCHRLATPLLLGNTEKPLGFYW	SGDLFKFCHPTHHLQVPGREQWRGQARHQI	0.699311	0.706993	0.703152
HLA-A1101	TSGFSVNSK	ASEETRAAKLRACQPNATHQPECATWQRCP	RASKTKHCRTQSAGKWTQG	0.752731	0.653566	0.703148
HLA-A1101	HVLKVDKCYK	KPKVTKYCLICVKDSYTDFHIDSGGASAWY	CIVKQGQTLFIPSGWIYATLTPVDCLAFAG	0.771151	0.634996	0.703073
HLA-A2402	AFADFGKIW	QFEIWENLDGNFSVSTILEKPQNMMVVGQS		0.50653	0.899165	0.702847
HLA-A1101	RAQDISRLRRK	LEHVQTRLREIQPCLAESRAAREKESFNLK	LEKQRKVEVYADADEILQEEIKEYKARLTC	0.963772	0.441854	0.702813
HLA-A0301	AAFWYVTNRY	YTLFGLQAIYVTALYITSWLLSGTWLSGLL	HKS	0.790234	0.614869	0.702552
HLA-A1101	ISFSKLWER	LYWEKDINTSELSFHCPQQPQWCGFHTPLL	TVPTVTTSHCPRKYLTNWRTTSKKLIRQHG	0.805505	0.598998	0.702252
HLA-A0201	VLLCQSVHV	ANQELSSNIVEVVQSSPVERPSTSTAVFGT	KRKRIAP	0.55213	0.852166	0.702148
HLA-A0201	FLFSVAVPT	SLLELRALQTLSLGGNQLQSIPAEIENLQS	TICGVQ	0.619195	0.784335	0.701765
HLA-A0301	RTGTGPSTLR	TKTPSNSFTRSSSLREMPPPMHTSSSTPLM	TLWLASPSCCGAQSTRSSSGPLISTTLTRM	0.83279	0.570241	0.701516
HLA-A1101	SAVAGTSCGK	MLYYVKDIPATLKFFHSLLGTNAKMLIIVV	STDHAFPRMTSASISHQMTSLRCWTT	0.730275	0.672597	0.701436
HLA-A1101	FTLDEIQSLKR	RSKFLLEDAIPSSDFTSAWSTNHHLASIFD	CRLHRRCQHLWLCLHQPLL	0.837725	0.564995	0.70136
HLA-A0201	CLANFFVFSV	LGSLQLPPPRFDRFSCLSLLSSWDYRCVPP	ETVSLCWPGWSQTPDLVIRPPRPPGVLGLQ	0.626682	0.775704	0.701193
HLA-A1101	ATTTCPTPAR	TLGSLTATSCLERTAWSWCGMIRDNGVTCP	WGWCPVGRHRSCPWLKCSAAHGCAMRWTLC	0.834498	0.567509	0.701004
HLA-A1101	STANAEEPAGR	AIAGICHPDHGGRSSHPQGPVRQMSPSCTW	KALSVEKDAGCRGPSWECPRGWINLFAESL	0.924129	0.477588	0.700859
HLA-A2402	SYPQVLSKWI	LFLVALVMSSTRTTGDWQKFGWMNLKISST	MEMCQSEKH	0.870669	0.530954	0.700811
HLA-A0301	CLYNVRSHK	KIKKEPHSPCSEISSACSQEQPFKFSYGEK	WE	0.723996	0.67736	0.700678
HLA-A2402	FFLGERRWRW	NVPRPQTASFPALFPPRLASPAPRPLVSGL	GGTWRRGRVPDCLQWVGRVGGCAWALILCA	0.774234	0.626619	0.700427
HLA-A0101	CTGTVPGGSLY	KQYCLEVQTRCPFILPDNDEVIYGGLSSFI	TSLRWFCFLV	0.837909	0.561347	0.699628
HLA-A1101	SQVEPIQPLLR	NISVINGTSPFAYDYDLTHIVAAYQERNGE	TFKVD	0.910154	0.48906	0.699607
HLA-A0201	WLWGISIWPA	ACSCAPAHPQQHICHSALGESEVREVHSRG	VHQESRGKGRSSNSYRLSLAEADGWRRTRR	0.896009	0.502984	0.699496
HLA-A2402	LYRKPNGLVL	DLAVAPLAITYVREKVIDFSKPFMTLGISI	MSGIIHTLATLTQTWWKTILPC	0.974862	0.424045	0.699454
HLA-A0201	FLQQLGKVVL	PERLYIQVFLKKDDSVGYRALVQTEDHLLL	WSREESLAEVVCLEMVDLPLTGAQAELEGE	0.967016	0.431823	0.69942
HLA-A0301	RLCIFSAITK	VEFDYDGPLMKTEVPGPRSQELMKQLNIIQ	RAEAITWLMWTATECWIFIPRSPLSP	0.606529	0.792209	0.699369
HLA-A0201	FLWSLNGKILS	LFSSFQEFLQRQVWLTTLTRGQLPKKVLNC	SRKSKI	0.947566	0.451142	0.699354
HLA-A0301	ALQEMGSKKK	AREVSKKPASGPGAVVRPPKAPEDFSQNWK	PKIIQQNKKETSPQVKGEEMPAGKDQEASR	0.864088	0.534219	0.699154
HLA-A0201	ILPKAQLPSL	PQQGPQCRPSQCCPLTAPAEVEWPWSPHQV	SYSFSSPCSSGSP	0.683944	0.713839	0.698892
HLA-A1101	KVSGISGDK	HGFSLIQVDNTKVTMKEILLKAVKRRKGSQ	VEIDPVTNQKASTKFWIKQKPISIDSDLLC	0.81258	0.5851	0.69884
HLA-A2402	CYNLPFRL	HPLTLLLVKCYLLQLSSYFMRPQLLLVLKY	LMLTPCLKLFFQLCPVIQYWLKPPKLIKLV	0.983472	0.414048	0.69876
HLA-A0201	ELLEGEVLPGV	IGGGDTATCCAKWNTEDKVSHVSTGGGASL	DALSNI	0.995487	0.402	0.698744
HLA-A1101	FASWPTSARK	LSQAKKMLPITMPEGTTPLARRSLTSCWTE	SKLEFSIYPAPQVSTAV	0.573739	0.823187	0.698463
HLA-A2402	KQLNIIQRL	QAAAKVDVEFDYDGPLMKTEVPGPRSQELM	CIFSAITKRAEAITWLMWTATECWIFIPRS	0.611263	0.7849	0.698081
HLA-A0301	LLLFLQQLGK	GTRPERLYIQVFLKKDDSVGYRALVQTEDH	VVLWSREESLAEVVCLEMVDLPLTGAQAEL	0.945201	0.450502	0.697852
HLA-A2402	YMKIFLTKF	QASLKIHLLLKEWRLMKLLTLMTWMNILSY	GVLL	0.557575	0.83702	0.697297
HLA-A2402	TLAPAGWTW	MVSLRLRSNW	RIWRKM	0.483993	0.909293	0.696643
HLA-A2402	VLIPFLEQNNF	QGLLPPPEKLTAEVLGIICIVLMATVLKTI	SPNTRTQKGKKNLGREFAGLYFEELQSAFY	0.95319	0.439949	0.696569
HLA-A1101	SSPGLSTEGK	KGPFSVVRRCINRETGQQFAVKIVDVAKFT	RWISNLKREASICHMLKHPHIVELLETYSS	0.876812	0.515358	0.696085
HLA-A2402	LFFFSFSLF	KFLAGFVCHIEKNEVETNADTFCLYGVFLF	FFFHFSTLFAFFFCGGGVGRRGCPRENKTH	0.763201	0.62796	0.695581
HLA-A2402	VLIPFLEQNNF	QGLLPPPEKLTAEVLGIICIVLMATVLKTI	SPNTRTQKVVITLVRKEELGKRVCWPVLRR	0.950798	0.439949	0.695373
HLA-A1101	RSGLPQPRR	MVPEAW	RAATIRLRPCNRDADNQGSAGLRGHQTP	0.805802	0.584642	0.695222
HLA-A2402	GYRELFPLLQW	ILVYSNCRKTYIVNDRPPCFQFCDREERHW	APEGKVGGQLTLGEMIGWRREQRYLYLGDR	0.908427	0.481088	0.694758
HLA-A1101	TVLLCQSVHVK	PANQELSSNIVEVVQSSPVERPSTSTAVFG	RKRIAP	0.867904	0.521499	0.694701
HLA-A1101	VVQQQKLKKK	PAKSKTAAAASEKNRGPRKGGRVIAPKKAR	SESGRRSNMTW	0.958455	0.430093	0.694274
HLA-A2402	GYVIPPQASL	IKGMDQGLLGMCPGERRKIIIPPFLAYGEK	VFHVLLIDVHNPKDAVQLETLELPPGCVRR	0.835065	0.553273	0.694169
HLA-A1101	KLHIINKSFK	VKIFEKMDHKARLQRMQELQEAQNARVIVF		0.601928	0.786376	0.694152
HLA-A1101	LLFLQQLGK	TRPERLYIQVFLKKDDSVGYRALVQTEDHL	VVLWSREESLAEVVCLEMVDLPLTGAQAEL	0.779854	0.607447	0.69365
HLA-A1101	GLWGFGVGWCK	WRTRLLPTPGTWRPARPWPLPPPPQVRAGA	VCVGQLWREQKPSGRAVNCVLLAAGLRAPG	0.63198	0.755259	0.693619
HLA-A2402	SYYMKIFLTKF	KNQASLKIHLLLKEWRLMKLLTLMTWMNIL	GVLL	0.992168	0.394774	0.693471
HLA-A2402	TIPETSSTF	SEGIPTSRSPRTPSSFTPRPTALRKWPGPN	TSG	0.618771	0.767897	0.693334
HLA-A0101	KTITAEDFRKY	KEMEQIVEEEEKFKKQWEEDWGSKEQLLLP	EEGFDPYSMFTPEQIMGKDVRLLRIKKEGS	0.799737	0.586828	0.693283
HLA-A2402	LLAPMLVMF	YPVPQREMDRRKGDRTLPVRFGNVEAPWRL	FGRQLHTLFLVALVMSSTRTTGDWQKFGWM	0.661161	0.724531	0.692846
HLA-A1101	AVAFSAETR	VAVRRFDCLSLEPASLEGGRRVPGRAPENC	VSGAVTVRPASRFISDAG	0.791603	0.59378	0.692692
HLA-A1101	KTGQNHPFFRR	QLERKRTRELLELGIDNEDSEHENDDDTNQ	SDSMTFLGCIPPNPFEVPLAEAIPLADQPH	0.875597	0.50923	0.692413
HLA-A0201	GILKVLLFSV	YPGITEELLRSQLYPEVPPEEFRPFLAKMR	VSGLEQNPLAAGFRLSPPCLPLSSQAERLF	0.91652	0.468253	0.692387
HLA-A0201	SLWLPSHGA	GGSGVQGHPQQGFPSFHHQRLASCFPKPGV	VAAHRGLPWGACCSSSWFCCCCSAQVWELG	0.493302	0.891413	0.692358
HLA-A0201	IMSAVPFLILV	LAFMLVEGNFVLFCTYTLGFRNEFQNLLLA	ALMESNLIITYAVAVAAGISVAAAFLLPWS	0.953102	0.431464	0.692283
HLA-A1101	ASWPTSAR	SQAKKMLPITMPEGTTPLARRSLTSCWTEF	KSKLEFSIYPAPQVSTAV	0.824159	0.560112	0.692136
HLA-A0101	DTIPSQDYDYF	LQLDTQRSSRDSLQCSSGYSTQTTTPCCSE	SVSGDQEADQQEFDKSSTIPRNSDISQSYR	0.783557	0.600638	0.692097
HLA-A2402	LMSGIIHTL	TYVREKVIDFSKPFMTLGISILYRKPNGLV	ATLTQTWWKTILPC	0.68756	0.696236	0.691898
HLA-A1101	GTLRAHPPLR	HVGLRGAGGVTGPLPGHGLQLPVRRLLRDP	QA	0.947374	0.436262	0.691818
HLA-A1101	LMAEKNVEK	EVGWKYQAVTATLEEKRKEKAKIHYRKKKQ	KIDKYTEVLKTHGLLV	0.643144	0.740397	0.691771
HLA-A0201	GLPGEHPDLQV	AGSVTALVQCVLRATKHREQGGHLPGGWRP	SEQLAGHHRERRRHPPQCVQPRRHP	0.961266	0.42169	0.691478
HLA-A1101	LLRDPGTLR	VPVHGHVGLRGAGGVTGPLPGHGLQLPVRR	AHPPLRQA	0.547528	0.834939	0.691234
HLA-A0201	WVFPEKPVPA	MFLLPKQNHL	PKASWLEETRPNPFAALTGGSNGFCEKKFP	0.940968	0.441236	0.691102
HLA-A2402	YWLKPPKLIKL	VLKYCYNLPFRLLMLTPCLKLFFQLCPVIQ	VLQCCISLYQILLQVKTCCTLHLYQFLMCR	0.997909	0.383543	0.690726
HLA-A0301	QNARVIVFK	APKSVLGKVKIFEKMDHKARLQRMQELQEA	LHIINKSFK	0.752128	0.629277	0.690703
HLA-A0101	LSTTEIPCKY	DFAYDSVPSCHSIYMRQEGFLAHPSRTEVK	RSE	0.610234	0.771068	0.690651
HLA-A0201	ALDAGTAKAYL	YERLKKSLANAESQQQREQLERLRKDMGSV	LCCTLLI	0.944134	0.436063	0.690098
HLA-A0201	HLLLKEWRL	VEQLLYYLQNRRDSLSGKGKKKKNQASLKI	MKLLTLMTWMNILSYYMKIFLTKFGVLL	0.946077	0.433975	0.690026
HLA-A0101	LTTVVQGRFY	VGAWLGALPIPLDWERPWQGAWYCEMSNLI	SHFIH	0.97454	0.405025	0.689782
HLA-A0201	YLLQLSSYFM	SLKHLVTLRLNLCLVQTQSQHPLTLLLVKC	RPQLLLVLKYCYNLPFRLLMLTPCLKLFFQ	0.836841	0.542664	0.689753
HLA-A0301	KQLMAEKNVEK	AHEVGWKYQAVTATLEEKRKEKAKIHYRKK	KIDKYTEVLKTHGLLV	0.662766	0.716669	0.689717
HLA-A2402	LYPSTPLPV	MMVEWVGEEKENWPCLTYVFSCS	SSSFRPLILVYSNCRKTYIVNDRPPCFQFC	0.688641	0.689957	0.689299
HLA-A0301	HLYQFLMCR	LKPPKLIKLVLQCCISLYQILLQVKTCCTL	LLLICTLLHFKV	0.817217	0.56059	0.688904
HLA-A0201	ALGESEVREV	LRLLALLRPPGLGEACSCAPAHPQQHICHS	HSRGWLWGISIWPAVHQESRGKGRSSNSYR	0.854602	0.522634	0.688618
HLA-A0301	GTLTPKQPALR	LHLKSEKPQTKLLILHQAVAVILSLEQQVR	EGKKKKFLPYRQSRQPHCQEPILGLVKLPT	0.975448	0.401658	0.688553
HLA-A1101	CVASHPETSK	EIVNIYPSINPPTLTAHQSNRVCNALALLQ	TRPFEYLRLTSLGVIGALVKTDEQEVINFL	0.805963	0.571073	0.688518
HLA-A1101	SAQRPLSPR	LIEIENFKSYKGRQIIGPFQRFTAIIGPNG	IGTLQLLSTLLWRRHF	0.629232	0.74769	0.688461
HLA-A0201	YILPILLFCL	SKTNAIPLTCPLAVLTSALCSVVIWWIVCD	DGFRTQ	0.902494	0.473359	0.687927
HLA-A1101	FLLSLFTAK	GISAKSLRGRDSTRKQDASEKDSVPMGSPA	YCTRGRSWAAGREQQMERSLLIVLISWKTT	0.765286	0.609281	0.687284
HLA-A0201	LLLGLSRFL	MPARSLLFACPYILP	VSYSDSHPF	0.703759	0.670544	0.687151
HLA-A0301	TLRNTKIKKK	WPADGSEEYGNFLVTQKSVQVLAYYTVRNF	GRPSGRVVTQYHYTQWPDMGVPEYSLPVLT	0.921656	0.452463	0.687059
HLA-A0301	ATPALPSTVLR	FTDLQNWPRANITLQLSCTRAMCVSATTQA	RSTMGNSTPLSWLPLTRW	0.84998	0.522633	0.686307
HLA-A0101	HTEQHWTLLKF	AAHSAVAMGKHVYIFGGMTPAGALDTMYQY	DTLLPPGRLDHSMCIIPWPVTCASEKEDSN	0.962654	0.40908	0.685867
HLA-A0201	ALEEKKGNYVV	MRPSGTAGAALLALLAALCPASR	TDHGSCVRACGADSYEMEEDGVRKCKKCEG	0.944277	0.42675	0.685514
HLA-A0301	VLVPQPPEY	PSDGVGLSCPGWSAMAQSQLTAASASQVQA	LGL	0.836321	0.534655	0.685488
HLA-A1101	VEYGVAGSKK	PRISNLTAAAAETYANISWEYEGPEHVNFY	QFHYPIFNLGDAFFKRLKTFLRIYYGSS	0.956066	0.414827	0.685447
HLA-A2402	MFFGRQLHTLF	MDRRKGDRTLPVRFGNVEAPWRLLLAPMLV	LVALVMSSTRTTGDWQKFGWMNLKISSTSY	0.955926	0.414386	0.685156
HLA-A2402	VYKVESNYLSL	RAFAGASQTHTLTSECPIPAFPHLVMSPVS	L	0.982602	0.386463	0.684533
HLA-A0101	WHDPGFTPFSY	TSSHWDRPYSREVAAFPLTESRSVAQAGVQ	LSLPLGLQAPATMPG	0.980048	0.388922	0.684485
HLA-A1101	GSDSTTGPSK	PSAGCTARIWPASAHPRNRTSSTTGTGSTS	ATSCGRMASPCSMRTGTLGSLTATSCLERT	0.894839	0.473626	0.684232
HLA-A1101	ASASCHSGPLK	APRTAPGRLHLLVLQAAQAIVESPPGVQNG	SPM	0.756291	0.611831	0.684061
HLA-A0101	TGEAVSTHTY	FADVEVLGPAVTFKVSANVQNVTTEDVEKA	THTHVCAHTHARKHAHAQPGQRETHTTHMG	0.751766	0.615939	0.683852
HLA-A0301	SLLIVLISWK	SPAFLLSLFTAKYCTRGRSWAAGREQQMER	TTVRRC	0.98002	0.387348	0.683684
HLA-A0201	LLAPVRSL	MAERKPQDVWVLLPEHSLVPGCLDGGGVQY	SGDLGLGPCARPLPPVVGQGQPPGAGEDAH	0.993813	0.373347	0.68358
HLA-A1101	VIQYWLKPPK	LLLVLKYCYNLPFRLLMLTPCLKLFFQLCP	LIKLVLQCCISLYQILLQVKTCCTLHLYQF	0.861134	0.505967	0.68355
HLA-A2402	HFSTLFAFFF	NEVETNADTFCLYGVFLFLFFFSFSLFFFF	CGGGVGRRGCPRENKTHCFNLALNQPKNNF	0.615991	0.750801	0.683396
HLA-A0201	SLLLRMSSL	VTGDSEGATVQVKFSELLWGGKGHRRLFHH	LSNALLPADTS	0.607298	0.758993	0.683145
HLA-A0301	KVTYFFPVY	QAAPSGLRSQVQFNVEVLCQELTANIVKLE	GGSHSSACWLP	0.957233	0.408756	0.682994
HLA-A1101	HVIGDPCCLR	PAVRPLVDTGAMVFVVFGIIGVNRTRQVDN	QQL	0.503598	0.861892	0.682745
HLA-A0301	VLEGMVVRK	NAGKDTNGSQFFITTVKTAWLDGKHVVFGK	VESTKTDSRDKPLKDVIIADCGKIEVEKPF	0.686115	0.678983	0.682549
HLA-A1101	FASWPTSAR	LSQAKKMLPITMPEGTTPLARRSLTSCWTE	KSKLEFSIYPAPQVSTAV	0.431085	0.933942	0.682513
HLA-A0201	SLTMLPMLV	SVHGSDEHGRLLRRTLMRYVNLTSLLIFRS	LNSWPQAIFPP	0.653233	0.711777	0.682505
HLA-A1101	AVPVHGHVGLR	RHPTRTRCPRRLRAAERALIPGTAARRRLH	GAGGVTGPLPGHGLQLPVRRLLRDPGTLRA	0.940367	0.423938	0.682153
HLA-A0201	RLSAQMLVPV	MPKRKAAGQGDMRQEPKRRSA	TPEVKPKRTSSSRKMKTKSDMMEENIDTSA	0.787882	0.575414	0.681648
HLA-A0101	VFETNIREY	LLILGNVSEFQRVVEVLQDSVDFDIDVNAS	NKAIRNYTRFDDWYLWVQMYKGTVSMPVFQ	0.633193	0.72998	0.681587
HLA-A1101	TALNQKNWGK	IQLLCVCRLDWANGYYRQQRKLVEEIGWSY	KYPTCNSPKQSPINIDEDLTQVNVNLKKLK	0.761908	0.601097	0.681502
HLA-A2402	KWSDYILTLNL	PDEIGPKHWPTSRFAHVMKLRQAALRTARE	LIAENKTIVAPMLESRGLYSNFWCGITPKG	0.996206	0.366607	0.681407
HLA-A0201	YLFSVSTET	VNRRGSRWSGGMTFAGRRAPFNPLQRYIFI	LPRS	0.612622	0.749521	0.681072
HLA-A0301	KTFLRIYY	NFYVEYGVAGSKKQFHYPIFNLGDAFFKRL	GSS	0.998624	0.363411	0.681018
HLA-A0301	QLMAEKNVEKK	HEVGWKYQAVTATLEEKRKEKAKIHYRKKK	IDKYTEVLKTHGLLV	0.971528	0.390311	0.680919
HLA-A0201	ILLVVLFAA	GNMQSCSAEALLLPAGLSTGALIAILLCII	LKRQRKKEPLILSKEDIRDNIVSYNDEGGG	0.736925	0.624729	0.680827
HLA-A2402	TWPQFCQF	MLQT	QNVI	0.963546	0.397278	0.680412
HLA-A1101	GTGQEVQTGLK	SAVALDWDSRDDHVYWTDVSTDTISRAKWD		0.885645	0.474493	0.680069
HLA-A2402	HFTTLIKAEF	FIKSVPPFLRTHGFDGLDLAWLYPGRRDKQ	IKEAQPGKKQLLLSAALSAGKVTIDSSYDI	0.808227	0.55163	0.679929
HLA-A0101	ALPPLPTVAY	PTNTQGKPLCPWAPPGSPYLYWGREKPSHL	SALLSSQGGSSCALSSSLLLLALF	0.747724	0.610689	0.679207
HLA-A1101	CIFSAITKR	FDYDGPLMKTEVPGPRSQELMKQLNIIQRL	AEAITWLMWTATECWIFIPRSPLSP	0.655098	0.703271	0.679185
HLA-A0201	WLAEGKAKFAL	TNVRKRKFINRDLAHDSEELFQDLSQLQET	KGGKATLEGERKEVLNLLS	0.983122	0.375238	0.67918
HLA-A2402	AYVHFTLI	FADLSHNRPTGGRSVLWMRPIALEMCRIIA	SRGI	0.998984	0.359201	0.679092
HLA-A0201	RLSAQMLVPV	MPKRKPKRRSA	TPEVKPKRTSSSRKMKTKSDMMEENIDTSA	0.782598	0.575414	0.679006
HLA-A0201	FLAKMRGILKV	QDTFHGYPGITEELLRSQLYPEVPPEEFRP	LLFSVVSGLEQNPLAAGFRLSPPCLPLSSQ	0.983758	0.373509	0.678634
HLA-A2402	FLLPKQNHL	M	WVFPEKPVPAPKASWLEETRPNPFAALTGG	0.815945	0.539616	0.67778
HLA-A2402	FYGFLIFF	PVVHPLDLKYDPDPGESVSICGKNEASAYN		0.872604	0.482607	0.677605
HLA-A0301	SIRPPGPGGGR	LGGSGGKGLHACRGEPRGLLREASQTLSCH		0.438653	0.916036	0.677344
HLA-A0301	TTHERVVQR	VEESYAMPTKTIEVLQLQDQGSKMLLDSVL	FECYVCRNFLGNNPKQSS	0.725538	0.628894	0.677216
HLA-A1101	SVFPLQERKR	TGKAEGAGFATTQTPLWLLGEVEAPRGGRL	GRDEELFL	0.974876	0.379538	0.677207
HLA-A1101	PSYVPKPK	DGTRLVGEDAPKNKDLVEWLKLHPTYTVDM	QKRHRCRNPNKLDINTLTGEERVPVVNKRN	0.993469	0.360082	0.676775
HLA-A0201	FLVPFCVICL	VSGFTQGHQTKPLRAEIVTGISNQVSHLFL	PDRHDFNIFVHIPYLIHKCSLLFHLLPTLP	0.640888	0.711998	0.676443
HLA-A0101	LYDTDRGYY	ESQFVLQLRPSLRGALLSLLDHYEWNCFVF	RGYR	0.839325	0.513558	0.676441
HLA-A1101	GTAPPRYR	MRMTSTDYSLSATTHWHVGGLPPARPALWT	APDSPAPTHCPLI	0.909432	0.442326	0.675879
HLA-A1101	ALQEMGSKK	AREVSKKPASGPGAVVRPPKAPEDFSQNWK	KPKIIQQNKKETSPQVKGEEMPAGKDQEAS	0.785691	0.565486	0.675589
HLA-A1101	DMPSYVPKPK	LEDGTRLVGEDAPKNKDLVEWLKLHPTYTV	QKRHRCRNPNKLDINTLTGEERVPVVNKRN	0.699239	0.65169	0.675465
HLA-A2402	AQNARVIVF	NAPKSVLGKVKIFEKMDHKARLQRMQELQE	KLHIINKSFK	0.777854	0.5711	0.674477
HLA-A0201	HMLGQTTWL	LAHLKMSLSLEVATYRYETSPVHPGTQRHT	KGTRGVGDGNSAATGFCDSRLVTSTPEHVL	0.469576	0.879228	0.674402
HLA-A0301	SLASGGGGGEK	ELSMVGQASISGSEDITTSPQLSKMPSTSL	SKLRPKELPRGEISWRWLPSFESLRWSQKM	0.794526	0.553805	0.674165
HLA-A1101	HTSSSTPLMR	RMSVPRAWWTKTPSNSFTRSSSLREMPPPM	TGTGPSTLRTLWLASPSCCGAQSTRSSSGP	0.622627	0.725566	0.674097
HLA-A0301	TTLTRGQLPKK	RLNKSSEDFSAIDYLLFSSFQEFLQRQVWL	VLNCFLWSLNGKILSSRKSKI	0.831018	0.516667	0.673842
HLA-A1101	KSGKFTGAMGK	GTAASPPRGPLHTTDPQGSPQAQTGSQNFG	AQSPQKGATEPQAGFRCPQSPRATGIATDP	0.748921	0.598625	0.673773
HLA-A2402	RWAFTLIII	FSFLDPFSPGVWLFMLLAYLAVSCVLFLVA	SSYTANLAAFLTVQRMDVPIESVDDLADQT	0.934366	0.412672	0.673519
HLA-A0201	RMGDGTAPAL	PGCILSFQLKVCFLPVMWLFILLSLALISG		0.670227	0.675913	0.67307
HLA-A2402	MFFGRQLHTL	MDRRKGDRTLPVRFGNVEAPWRLLLAPMLV	FLVALVMSSTRTTGDWQKFGWMNLKISSTS	0.804664	0.541306	0.672985
HLA-A0101	YDTDRGYY	SQFVLQLRPSLRGALLSLLDHYEWNCFVFL	RGYR	0.954907	0.390907	0.672907
HLA-A0301	IQYWLKPPK	LLVLKYCYNLPFRLLMLTPCLKLFFQLCPV	LIKLVLQCCISLYQILLQVKTCCTLHLYQF	0.69499	0.650758	0.672874
HLA-A1101	ATVCWELKLR	YPVLLVDDLSVLLSLGMGAVAVLDFIHYCR	ILWRRPSQPAVHRDQSFTYQYKIQDKSVSF	0.701519	0.643935	0.672727
HLA-A0101	DVDTGLLAF	LLFAILLAFLLAIAYLIVKELHAENLKNED	LGQ	0.753568	0.591867	0.672718
HLA-A0301	SVHKVIER	GFKRAFIITGQTYTRKVDIEVLSVLASLGA	RIRQELPFMATENIIMAMVKAGGSRQVQRF	0.967573	0.377371	0.672472
HLA-A0301	SVHKVIER	GFKRAFIITGQTYTRKVDIEVLSVLASLGA	RIRQELPFMATENIIMAMVKAGGSRQDCHE	0.967546	0.377371	0.672459
HLA-A1101	FVSIFIYKR	QQRKLVEEIGWSYTGKHITYIMRFSRNFYC	KLCSTTHHVNLAKWIVRLINRYIKYKTISY	0.93188	0.412693	0.672287
HLA-A0201	VLEGDSSEVLV	MAQLFLPLLAALVLAQAPAALAD	ARGVRVKVNEAYRFRVALPAYPASLTDVSL	0.913778	0.429666	0.671722
HLA-A0101	WAPPGSPYLY	ATYARPPRGPGPPTPAWAKPTNTQGKPLCP	WGREKPSHLALPPLPTVAYSALLSSQGGSS	0.944212	0.399192	0.671702
HLA-A2402	HWPQPRLSTL	WRLEPAGGVLPQARRAGGGDARCLWEACLP	ALFPAAPAPGLEGPLY	0.850427	0.491723	0.671075
HLA-A0301	CIFSAITKR	FDYDGPLMKTEVPGPRSQELMKQLNIIQRL	AEAITWLMWTATECWIFIPRSPLSP	0.755627	0.586079	0.670853
HLA-A1101	GSNGFCEKK	LWVFPEKPVPAPKASWLEETRPNPFAALTG	FPRL	0.730754	0.610669	0.670711
HLA-A0301	SINQTNSTK	WTSRLPHCVFNQDSFEHALEGEFQNEKKKS	QGQVFEYLYLDT	0.724483	0.615531	0.670007
HLA-A1101	VLEGMVVRK	NAGKDTNGSQFFITTVKTAWLDGKHVVFGK	VESTKTDSRDKPLKDVIIADCGKIEVEKPF	0.669948	0.669935	0.669941
HLA-A0201	WLSLVPSSL	MTFSLAAMSC	EASSWF	0.59356	0.746135	0.669848
HLA-A0101	TFLPPKGLLY	KLKHRRTSETSISPPGSSIGSPNRVICVCI	S	0.744951	0.594727	0.669839
HLA-A0301	SVFPLQER	TGKAEGAGFATTQTPLWLLGEVEAPRGGRL	KRGRDEELFL	0.986867	0.35275	0.669808
HLA-A0301	GVMAAGLSR	IHDNFGIVEGLMSMPSLPPRRLWMAPPGNC	TSSLPLLALPRLWARSSLS	0.697222	0.642374	0.669798
HLA-A1101	AVFLSCSLGR	PVSALGREGTPAAACSSSSGGSPAPAGAHG	LPCPLPPLPPCSLLSLCNPTRSSEARNPAR	0.726097	0.613351	0.669724
HLA-A0301	RAQDISRLR	LEHVQTRLREIQPCLAESRAAREKESFNLK	RKLEKQRKVEVYADADEILQEEIKEYKARL	0.48848	0.85046	0.66947
HLA-A1101	AILPPRSQNWR	SGSAPQPPKTKLPSTPCVPDPTKQAEEILN	RKRETWRGK	0.991549	0.346587	0.669068
HLA-A0101	NWDLAWAVSY	QHEYFFLIGPPLLIPMYFQYQIIMTMIVHK	YIRFFITYIPFYGILGALLFLNFIRFLESH	0.896042	0.441856	0.668949
HLA-A0301	GTLRVQLGR	EENPAWLPLYGSVCCRLAAQPLCMTQPTAS	CRTGHKCMEF	0.592172	0.745487	0.66883
HLA-A2402	WWTKTPSNSF	GWTSCRPRPSSPRRSCSLSTGALRMSVPRA	TRSSSLREMPPPMHTSSSTPLMRTGTGPST	0.926038	0.411372	0.668705
HLA-A0101	KTFLRIYY	NFYVEYGVAGSKKQFHYPIFNLGDAFFKRL	GSS	0.993782	0.342715	0.668248
HLA-A0301	STTHHVNLAK	YTGKHITYIMRFSRNFYCFVSIFIYKRKLC	WIVRLINRYIKYKTISYGLSINKFGNVGLI	0.582305	0.753868	0.668087
HLA-A0201	SLFPKLRAT	RLSKREESIAKIGKKKYQKINLDEAEGIFL	EQMTNVGC	0.783755	0.552135	0.667945
HLA-A0301	RSHRLPLLLR	ARPGTPDPQALASVLLLLLWAPALSLLAGS	AGFPGPTLRAGHR	0.806699	0.528748	0.667723
HLA-A1101	AISWFRATNK	ISMPQKSFNATAERGEEMTFSCRASGSPEP	AGEDEKQAFLQVFVQPHIIQLKNETTYENG	0.637978	0.697186	0.667582
HLA-A1101	FIKSTICLK	FIQLSEFGFGQVIIVSEEPWKENISCSSTT	MGCPGWPQVILPPWSPKAQRLQV	0.594294	0.740105	0.667199
HLA-A0301	AAFPLTESR	DPRVNPLKMSPHSLTCVTSSHWDRPYSREV	SVAQAGVQWHDPGFTPFSYLSLPLGLQAPA	0.565676	0.767997	0.666837
HLA-A1101	SVFFPPCSQH	MLQDLSA	RTLGT	0.854865	0.47762	0.666242
HLA-A0301	AALGPNTESAK	MTQALVSTAWTSMWCWVGQVSASQTRSAGQ	RRPCAGSSRSMMGSSFLAN	0.608106	0.724315	0.666211
HLA-A1101	LSQHVLHK	QPHFPDGTLFDEQYSQTASYPSHSPLARGA	PVCAFCEVRKL	0.930663	0.401165	0.665914
HLA-A2402	IFNLGDAFF	NISWEYEGPEHVNFYVEYGVAGSKKQFHYP	KRLKTFLRIYYGSS	0.532656	0.799141	0.665899
HLA-A1101	VGNVLVRK	QGSGILHYAHGDSQQTHLLKQEAPWALVSV	RTHRVLVLKSRDRALI	0.998489	0.333165	0.665827
HLA-A1101	RSLPDVRLEGR	LIPKDDQEKMKELFKINQFNLMASDLIALN	SRSVAQARVQWSDLSSLQAPPPGFTPFSCL	0.761136	0.570408	0.665772
HLA-A0201	YLNSIPNL	YHSCKPHATAGPLYSDNSNISRYSEKEKGT	ASIHNRFLDNVFLGDRRVFPDIILE	0.997658	0.333358	0.665508
HLA-A1101	MGAWVSTEK	SSSSASSEASETCQSVSECSSPTSVSSGST	RRKEKREPDPNGGGPTTASGPPAAAEEAQR	0.475745	0.855151	0.665448
HLA-A2402	FLPIQTQKL	TGSHHTRSSSAMTVGPGGEVGTTAVGWTQY	QC	0.597495	0.733175	0.665335
HLA-A2402	FFSFSLFFF	LAGFVCHIEKNEVETNADTFCLYGVFLFLF	FHFSTLFAFFFCGGGVGRRGCPRENKTHCF	0.799282	0.531263	0.665272
HLA-A0301	QQVRGTLTPK	RMCQLHLKSEKPQTKLLILHQAVAVILSLE	QPALREGKKKKFLPYRQSRQPHCQEPILGL	0.687443	0.643081	0.665262
HLA-A1101	KAAKDVIVSR	LFIQEGARLGRTPAEVVSTCDITFACVSDP	GGRFLEAPVSGNQQLSNDGMLVILAAGDRG	0.859662	0.470618	0.66514
HLA-A0201	NLTETSEAV	SPLSISTALAFLSLGAHNTTLTEILKGLKF	WLRGLCH	0.811109	0.518648	0.664878
HLA-A1101	KSSCFPATK	ALPPDSLSTRKGLPRPSTAGHRVRESGHKG	SSCHGCHSQQSAAPQESGSPRTYQV	0.494834	0.834901	0.664868
HLA-A1101	ETNTNTAEK	INGTSPFAYDYDLTHIVAAYQERNGRLMEN	QTKEKAF	0.826929	0.502743	0.664836
HLA-A2402	VWPTFAQRLL	RAGDVEEDASQLIFPKACYSRKSFISLSWP	RSPRL	0.765382	0.564243	0.664813
HLA-A0301	LSAAKVLTR	VAHVDQRSREVLQMWSVLQDGPISRVIVFS	RGNPSTLGGRSGRIT	0.822816	0.506676	0.664746
HLA-A0201	AMWRWSLSL	WGWMTLGRVRSCGSGQAMTMWDGATTASPV	TG	0.531654	0.797808	0.664731
HLA-A0301	VFKLHIINK	GKVKIFEKMDHKARLQRMQELQEAQNARVI	SFK	0.770452	0.558877	0.664665
HLA-A0301	NLLAPQTLPSK	AVICFCLLGITCAIPVKQADSGSSEEKQKQ	SNESHDHMDDMDDEDDDDHVDSQDSIDSND	0.953055	0.37596	0.664507
HLA-A1101	KQLMAEKNVEK	AHEVGWKYQAVTATLEEKRKEKAKIHYRKK	KIDKYTEVLKTHGLLV	0.808147	0.520463	0.664305
HLA-A0201	TLLEEEGKAL	ESRGAIYSIPIMEDGGGGSSTPEDPAEAPR	EEEEKYEDEEEKEEEEEEEEVEDEALWAWP	0.969773	0.357216	0.663494
HLA-A0201	ALPGLPHGA	RPPPERVLALSFRAPQVQSCTPRAREAVVP	RPPSRGLGAARPR	0.659044	0.667828	0.663436
HLA-A0201	ALIPGTAA	AAGDTRGRPWDPARHPTRTRCPRRLRAAER	RRRLHAVPVHGHVGLRGAGGVTGPLPGHGL	0.967412	0.358875	0.663143
HLA-A1101	KILLVILPPR	MRALSQEITRDFNLLQVSEPSLENKVQRRK	GSCCRSIVEDHISAFCLHIGIQIRVCCVCV	0.931369	0.394568	0.662969
HLA-A1101	SLLLLSWIK	MKVMPYVDILFGNETEAATFAREQGFEKVK	TRKKLLIPMELEMHLLEVFCLNWSLTSL	0.742683	0.582414	0.662549
HLA-A0201	RLMKLLTL	LQNRRDSLSGKGKKKKNQASLKIHLLLKEW	MTWMNILSYYMKIFLTKFGVLL	0.995604	0.329451	0.662528
HLA-A1101	RLINRYIKYK	RNFYCFVSIFIYKRKLCSTTHHVNLAKWIV	TISYGLSINKFGNVGLIDIHPNCI	0.736527	0.588327	0.662427
HLA-A0301	LLSWIKTRK	MPYVDILFGNETEAATFAREQGFEKVKSLL	KLLIPMELEMHLLEVFCLNWSLTSL	0.702097	0.622672	0.662385
HLA-A0301	SLAPQPLGFR	PCSLLSLCNPTRSSEARNPARYCRPLIRSP	TPSST	0.886719	0.437955	0.662337
HLA-A1101	RLLRDPGTLR	AVPVHGHVGLRGAGGVTGPLPGHGLQLPVR	AHPPLRQA	0.818462	0.505567	0.662014
HLA-A2402	FFAQPDRATL	YQVKGWKLTQQQFVALLWKRLLIARRSRKG	WQVPQPGTSALDVQRTVHICQQ	0.80382	0.519471	0.661646
HLA-A1101	KSSLFHQEK	HFHPSNPEHLFTCSEDGSLWHWDASTDVPE	FWSGEHVWSMHACPCYNFIYRETNSFI	0.679998	0.643022	0.66151
HLA-A0301	QVWLTTLTR	FLQFRLNKSSEDFSAIDYLLFSSFQEFLQR	GQLPKKVLNCFLWSLNGKILSSRKSKI	0.965776	0.356874	0.661325
HLA-A1101	RLINRYIKY	RNFYCFVSIFIYKRKLCSTTHHVNLAKWIV	KTISYGLSINKFGNVGLIDIHPNCI	0.771198	0.550883	0.661041
HLA-A0301	AVSEMELVSR	SADAVCFDVDSTVIREEGIDELAKICGVED	LQERNVQVFLISGGFRSIVEHVASKLNIPA	0.803536	0.518455	0.660995
HLA-A2402	EYAQEHVSRL	MTKLQAKHQAECDLLEDMRTFSQKKAAIER	EIFSRGNNAGSPVSDEYM	0.557081	0.764909	0.660995
HLA-A0301	KVSGISGDK	HGFSLIQVDNTKVTMKEILLKAVKRRKGSQ	VEIDPVTNQKASTKFWIKQKPISIDSDLLC	0.864353	0.457605	0.660979
HLA-A0201	NLAQDLATA	ADVYQAELRELRLRLDQLTANSARLEVERD	PG	0.583731	0.738169	0.66095
HLA-A2402	SKIDKFFKL	LLKVMGFGLYLMDGNVSNIYKLDAKKRINL	QVVPLFGDMQIELARYIKTSAHYEENKSKW	0.909131	0.412282	0.660706
HLA-A0301	SLSAAKVLTR	RVAHVDQRSREVLQMWSVLQDGPISRVIVF	RGNPSTLGGRSGRIT	0.58341	0.737174	0.660292
HLA-A1101	ATLNSTAKAR	VKPLSCGSAQIWQHGTSLMNYLRMNWKVLP	GPTTL	0.808737	0.511542	0.660139
HLA-A1101	ISWFRATNK	SMPQKSFNATAERGEEMTFSCRASGSPEPA	AGEDEKQAFLQVFVQPHIIQLKNETTYENG	0.656007	0.663301	0.659654
HLA-A0101	VLVPQPPEY	PSDGVGLSCPGWSAMAQSQLTAASASQVQA	LGL	0.59812	0.721006	0.659563
HLA-A0301	EVHTGSVRRK	MLRAGAPTGDLPRAG	AYSEERPLGPE	0.775804	0.543074	0.659439
HLA-A0301	GSYTSYDYLK	HIAASHLSEPAKPAHSQNQSNFSSYSSKFL	RNVKW	0.530383	0.787982	0.659183
HLA-A1101	ISGGFQSRK	IEGQNHGRQLLPARGPQHPFISEDEKQELC	HGYEPRMFCVTTVCKKTQIQTAGRPDPGGA	0.742505	0.575366	0.658936
HLA-A2402	RYIFIYLF	VAKDPVNRRGSRWSGGMTFAGRRAPFNPLQ	SVSTETLPRS	0.999241	0.318513	0.658877
HLA-A0301	QLLSTLLWR	QIIGPFQRFTAIIGPNGSAQRPLSPRIGTL	RHF	0.894368	0.423223	0.658795
HLA-A2402	NFFRWLEHL	NRGVAGENLLNAASKLLGQNWVQNAFDGSC	RLLRVIGKTTELATF	0.65052	0.666519	0.658519
HLA-A1101	KTITAEDFRKY	KEMEQIVEEEEKFKKQWEEDWGSKEQLLLP	EEGFDPYSMFTPEQIMGKDVRLLRIKKEGS	0.765583	0.550855	0.658219
HLA-A0201	RLFHHSLLLRM	SVVIPVTGDSEGATVQVKFSELLWGGKGHR	SSLLSNALLPADTS	0.951952	0.364239	0.658095
HLA-A0301	SLKHLVTLR	GPLLIPPLRFLIMRLVKFQKITFQFNLHIL	LNLCLVQTQSQHPLTLLLVKCYLLQLSSYF	0.506193	0.808455	0.657324
HLA-A1101	ASGGGGGEKSK	SMVGQASISGSEDITTSPQLSKMPSTSLSL	LRPKELPRGEISWRWLPSFESLRWSQKMDK	0.889708	0.424816	0.657262
HLA-A0201	KLCSTTHHV	GWSYTGKHITYIMRFSRNFYCFVSIFIYKR	NLAKWIVRLINRYIKYKTISYGLSINKFGN	0.36241	0.952054	0.657232
HLA-A1101	CISGGFQSRK	GIEGQNHGRQLLPARGPQHPFISEDEKQEL	HGYEPRMFCVTTVCKKTQIQTAGRPDPGGA	0.761121	0.552843	0.656982
HLA-A1101	TLIKAEFIK	SVPPFLRTHGFDGLDLAWLYPGRRDKQHFT	EAQPGKKQLLLSAALSAGKVTIDSSYDIAK	0.675914	0.638032	0.656973
HLA-A1101	TSLLACTAQK	THYWSKNWAKAAAFVTSPPLSPDPTTPDYL	AVGKDNFTLIPEGVNGIEERMTVVWDKAVA	0.658109	0.655764	0.656936
HLA-A0301	AILPPRSQNWR	SGSAPQPPKTKLPSTPCVPDPTKQAEEILN	RKRETWRGK	0.995177	0.318497	0.656837
HLA-A0301	LTDQTGNLLRK	ICEKTVLKRVLKELWKLVMNTMEKTIVLPP	HGKGLEKGRVKLPSHSDGTQMIFNAAKELG	0.941132	0.372506	0.656819
HLA-A0301	SSCPGLPK	TLNGRTGWFPSNYVREIKSSGWSQTPGLQR	CWDYRGEPPCPGFISLNELHTNV	0.994474	0.318789	0.656632
HLA-A0201	LLADNIWLC	MVLILGCITCFSLFFFCNTATVYKICAWMQ	CPGCSAVA	0.799144	0.513907	0.656525
HLA-A0201	SQHPLTLLLV	QKITFQFNLHILSLKHLVTLRLNLCLVQTQ	KCYLLQLSSYFMRPQLLLVLKYCYNLPFRL	0.596201	0.716826	0.656513
HLA-A0301	GLGNPMAVVSK	LLEARDRVGGRVATFRKGNYVADLGAMVVT	QVNMELAKIKQKCPLYEANGQAVPKEKDEM	0.825328	0.486588	0.655958
HLA-A1101	AQTGSQNFGK	DYVERTFTGGTAASPPRGPLHTTDPQGSPQ	SGKFTGAMGKAQSPQKGATEPQAGFRCPQS	0.849494	0.462358	0.655926
HLA-A1101	STTEIPCK	FAYDSVPSCHSIYMRQEGFLAHPSRTEVKL	YRSE	0.821471	0.490376	0.655924
HLA-A1101	SLLIVLISWK	SPAFLLSLFTAKYCTRGRSWAAGREQQMER	TTVRRC	0.871974	0.439848	0.655911
HLA-A0201	FLMCRLLLI	KLIKLVLQCCISLYQILLQVKTCCTLHLYQ	CTLLHFKV	0.44802	0.86329	0.655655
HLA-A0301	GLGNPMAVVSK	LLEARDRVGGRVATFRKGNYVADLGAMVVT	QVNMELAKIKQKCPLYEANGQADTVKVPKE	0.82459	0.486588	0.655589
HLA-A0201	YSFVGGVIGL	DGVMNSEMHCTGDPDLVSEGRKSFPSIHSS	IFAYICYRQHYPPLANTACHKPYVSLRVPA	0.668222	0.642796	0.655509
HLA-A1101	GLGNPMAVVSK	LLEARDRVGGRVATFRKGNYVADLGAMVVT	QVNMELAKIKQKCPLYEANGQAVPKEKDEM	0.938346	0.372219	0.655283
HLA-A1101	GLGNPMAVVSK	LLEARDRVGGRVATFRKGNYVADLGAMVVT	QVNMELAKIKQKCPLYEANGQADTVKVPKE	0.938207	0.372219	0.655213
HLA-A0201	SQHPLTLLL	QKITFQFNLHILSLKHLVTLRLNLCLVQTQ	VKCYLLQLSSYFMRPQLLLVLKYCYNLPFR	0.544011	0.766222	0.655117
HLA-A0301	RVFPDIILE	EKEKGTYLNSIPNLASIHNRFLDNVFLGDR		0.957264	0.352828	0.655046
HLA-A1101	LGNPMAVVSK	LEARDRVGGRVATFRKGNYVADLGAMVVTG	QVNMELAKIKQKCPLYEANGQAVPKEKDEM	0.913868	0.395994	0.654931
HLA-A1101	AAYVHFTLISR	RFADLSHNRPTGGRSVLWMRPIALEMCRII	GI	0.96575	0.344039	0.654894
HLA-A1101	LGNPMAVVSK	LEARDRVGGRVATFRKGNYVADLGAMVVTG	QVNMELAKIKQKCPLYEANGQADTVKVPKE	0.913788	0.395994	0.654891
HLA-A0201	LLFLQQLGKV	TRPERLYIQVFLKKDDSVGYRALVQTEDHL	VLWSREESLAEVVCLEMVDLPLTGAQAELE	0.919372	0.390237	0.654804
HLA-A0101	ASQLIFPKACY	MAAGGSDPRAGDVEED	SRKSFISLSWPVWPTFAQRLLRSPRL	0.633591	0.675337	0.654464
HLA-A0301	RSWTKKQNASK	LLEAFKGSHKSGKQLPPHLVQGAKILNGAF	AVRPEVNTVASSDEVCDGDREKEEPPSPIE	0.933515	0.375123	0.654319
HLA-A0201	SLSATTHWHV	WHRRRQKEKGRDLAPRVSYTPAMRMTSTDY	GGLPPARPALWTGTAPPRYRAPDSPAPTHC	0.457153	0.851425	0.654289
HLA-A1101	RSHRLPLLLR	ARPGTPDPQALASVLLLLLWAPALSLLAGS	AGFPGPTLRAGHR	0.786828	0.521643	0.654235
HLA-A1101	QVTPHPSPR	APPLGPPALRVPPRPPPAGIEPNTKSVPTI	GSPLPTPKGTPVHTPKESPAGTPNPTPPSS	0.808656	0.499701	0.654179
HLA-A0201	LLQVSEPSL	LAGAPAARPTPPTCYSRMRALSQEITRDFN	ENKVQRRKKILLVILPPRGSCCRSIVEDHI	0.802899	0.505278	0.654089
HLA-A0201	HLYDTIVL	TVGVDFALKVLQWSDYEIVRLQLWDIAGAL	SGCLCLCYYV	0.9995	0.308131	0.653816
HLA-A1101	ALPPLPTVAY	PTNTQGKPLCPWAPPGSPYLYWGREKPSHL	SALLSSQGGSSCALSSSLLLLALF	0.8549	0.452643	0.653771
HLA-A1101	KTQTLPCKAK	LATSTEPEACGSASRPGHVLPLQAALRPDP	LTDKPLQGTKSNPFPASTPARPPATGLCPQ	0.665261	0.641996	0.653629
HLA-A1101	CSNGKLPLK	TNHEDGSPVNEPNETTPLTEPEYVAWSAHL	EEDGKEALNPETIEIKVSNDIIQSKEDDSK	0.647284	0.659697	0.653491
HLA-A0101	WTGTAPPRY	PAMRMTSTDYSLSATTHWHVGGLPPARPAL	RAPDSPAPTHCPLI	0.875587	0.43111	0.653348
HLA-A0301	GVAHIISTR	PEKPLFSSASPQDSSPRLSTFPQHHHPGIP	TPPPPSPLPFPTQAILPPAPSSYFSHPTIR	0.650973	0.655294	0.653134
HLA-A0201	FLYDTDRGYYR	GESQFVLQLRPSLRGALLSLLDHYEWNCFV	GYR	0.934113	0.371071	0.652592
HLA-A1101	RVPGSWRPPLK	TETLPTPRERNLASPSPSTLVEAREPHGPL	IILEELPQQGPQCRPSQCCPLTAPAEVEWP	0.754611	0.550476	0.652543
HLA-A2402	LFVSHLSGLMF	RAWCRTIAGDLVWAFGGKKTLAFCVTKVFM	FNL	0.795874	0.50903	0.652452
HLA-A0201	AIMSAVPFLI	SLAFMLVEGNFVLFCTYTLGFRNEFQNLLL	LVALMESNLIITYAVAVAAGISVAAAFLLP	0.495482	0.80933	0.652406
HLA-A0201	FLIGWKLST	GDASIFLILTTTGHYSLFPLLFTAPEKKNL	CLAWGLWKSAVNLYSLSPPGR	0.552765	0.751608	0.652186
HLA-A0201	HLVMSPVSV	EWKKDHISRAFAGASQTHTLTSECPIPAFP	YKVESNYLSLL	0.656832	0.647127	0.651979
HLA-A0101	YDSSRVQY	TLGSSQFSGSGIDERGGTTSWGTSGQPSPS	TR	0.942381	0.361159	0.65177
HLA-A0301	PSYVPKPK	DGTRLVGEDAPKNKDLVEWLKLHPTYTVDM	QKRHRCRNPNKLDINTLTGEERVPVVNKRN	0.985789	0.317599	0.651694
HLA-A1101	ALLPHLRK	GVERAGPEQELTRLLEFYDATAHFAKGLEM	HSFLPVL	0.994559	0.308404	0.651481
HLA-A0201	LLIPMELEMHL	ETEAATFAREQGFEKVKSLLLLSWIKTRKK	LEVFCLNWSLTSL	0.981643	0.321122	0.651383
HLA-A0201	GVMPTLLPA	SMTPPMLLGNPFLLPPNEIGSHSCQSFDSL		0.331781	0.970861	0.651321
HLA-A0301	RVPGSWRPPLK	TETLPTPRERNLASPSPSTLVEAREPHGPL	IILEELPQQGPQCRPSQCCPLTAPAEVEWP	0.738703	0.56391	0.651307
HLA-A2402	YFEELQSAF	LIPFLEQNNFSPNTRTQKGKKNLGREFAGL	YR	0.377165	0.925424	0.651295
HLA-A1101	VSVVGNVLVR	SCSQGSGILHYAHGDSQQTHLLKQEAPWAL	KRTHRVLVLKSRDRALI	0.831909	0.470437	0.651173
HLA-A0201	YLIEMDSQF	AQLLYKMIKSKTEYPLHKAIKVEREDVVFL	CRLEV	0.517069	0.78527	0.65117
HLA-A0301	KISESAKQDFK	ANKALDKARAKNKDVLQAETSQQLCCQKFE	TRRVAAFRKNLVELAELELKHAKGNLQLLQ	0.870149	0.431564	0.650856
HLA-A0201	YLYLGDRASHL	LFPLLQWAPEGKVGGQLTLGEMIGWRREQR	GRVGSAPPSHPPSSVWTIEPHPAPRTAPGR	0.905383	0.39627	0.650827
HLA-A0101	TAEDFRKY	EQIVEEEEKFKKQWEEDWGSKEQLLLPKTI	EEGFDPYSMFTPEQIMGKDVRLLRIKKEGS	0.997789	0.303364	0.650577
HLA-A1101	VIGDPCCLR	AVRPLVDTGAMVFVVFGIIGVNRTRQVDNH	QQL	0.730703	0.569497	0.6501
HLA-A0301	LIRQHGIYY	SKLWERTVPTVTTSHCPRKYLTNWRTTSKK	IVGPC	0.863511	0.436554	0.650032
HLA-A0201	LLREASQTL	SGSSWTPDPGGRLGGSGGKGLHACRGEPRG	SCHSIRPPGPGGGR	0.761893	0.537926	0.649909
HLA-A0301	YFLPIQTQK	MTGSHHTRSSSAMTVGPGGEVGTTAVGWTQ	LQC	0.598771	0.70089	0.64983
HLA-A1101	KSFPSIHSSY	PDFFYRCFPDGVMNSEMHCTGDPDLVSEGR	SFVGGVIGLIFAYICYRQHYPPLANTACHK	0.477271	0.822166	0.649718
HLA-A2402	EYAPCRSHI	CAPLYHWRTEMKQEREPVGTCFLQDGTKTV	DADGQGFCQGGFSIDFTKADRVLLGGPGSF	0.441708	0.857382	0.649545
HLA-A0201	SALDVQRTV	KRLLIARRSRKGFFAQPDRATLWQVPQPGT	HICQQ	0.76123	0.537365	0.649297
HLA-A1101	TVGGRHRLPK	KSHSPLSPHVPTVHSTDACWVPAGCWLWGG	LREFTFQL	0.872657	0.425814	0.649236
HLA-A0301	LSWIKTRKK	PYVDILFGNETEAATFAREQGFEKVKSLLL	LLIPMELEMHLLEVFCLNWSLTSL	0.810269	0.487898	0.649083
HLA-A0301	GLWKSAVNLY	HYSLFPLLFTAPEKKNLFLIGWKLSTCLAW	SLSPPGR	0.79948	0.498027	0.648754
HLA-A2402	KFYFNGCFHW	FLISGGFRSIVEHVASKLNIPATNVFANRL	IWRKCDQATSQG	0.597246	0.699819	0.648532
HLA-A1101	SLPLLALPR	MSMPSLPPRRLWMAPPGNCGVMAAGLSRTS	LWARSSLS	0.74979	0.54716	0.648475
HLA-A0101	DTIPSQDYDY	LQLDTQRSSRDSLQCSSGYSTQTTTPCCSE	FSVSGDQEADQQEFDKSSTIPRNSDISQSY	0.839576	0.457237	0.648407
HLA-A0301	ALRDVRQK	LMWVLVDVFLLLYFSECNKCDDKKERSLLP	STLMNFQTQV	0.973168	0.322853	0.64801
HLA-A0201	GLVKLPTLWV	PKQPALREGKKKKFLPYRQSRQPHCQEPIL	IC	0.831965	0.463938	0.647951
HLA-A1101	RSPGVPLGVR	AGGVGAVLREGGRAARPEPLSPSLLRRSLR	CRERPQVGPGLEGARPPPERVLALSFRAPQ	0.676446	0.61935	0.647898
HLA-A1101	AVLTPFERVR	FCTTLPPSFLRVDDRATSSTTDSSRAVSEM	RDPPVCTVSYQRF	0.937531	0.358098	0.647815
HLA-A0301	GSAPPAGPR	SRGHLIVQLQELLHHWVLWSAVKSRWVIVA	YSSGLIPTSRCCWTSSTT	0.483142	0.812025	0.647584
HLA-A0201	AVSEMMLSL	SADAVCFDVDSTVIREEGIDELAKICGVED	DLEEM	0.429263	0.865135	0.647199
HLA-A1101	SLAPQPLGFR	PCSLLSLCNPTRSSEARNPARYCRPLIRSP	TPSST	0.855736	0.438453	0.647094
HLA-A1101	WTLGTPPASR	GRLNIQAWRTAIYMMEPGVLRSRTPIHGFR	VLSHRAGTLSGGMTGSHHTRSSSAMTVGPG	0.762782	0.531218	0.647
HLA-A1101	GAQPGRLLR	PLYHLWGHGCHEHQELRDRGRGHGVLLDGL	PSRHHHPGHLCVLPGHLRAAAAPPRAQVRA	0.76474	0.528928	0.646834
HLA-A1101	RTQGERGLSWR	GAPPIFLPSDGQALVLGRGPLTQVTDRKCS	GCGLLQKREQSRGTLGCYAGLQWCSQPRSR	0.859943	0.432861	0.646402
HLA-A0301	RLWDCSWPR	SSQCTPTAQAPCPRPRRASGPGTLSATFCL	AWPALRSCWSTCAAVATPRMLGLACWLGPR	0.342906	0.949424	0.646165
HLA-A1101	TLTRGQLPK	LNKSSEDFSAIDYLLFSSFQEFLQRQVWLT	KVLNCFLWSLNGKILSSRKSKI	0.656828	0.635376	0.646102
HLA-A1101	VASHPETSK	IVNIYPSINPPTLTAHQSNRVCNALALLQC	TRPFEYLRLTSLGVIGALVKTDEQEVINFL	0.706808	0.584838	0.645823
HLA-A1101	HLGPAVQAVPR	LSGDLGLGPCARPLPPVVGQGQPPGAGEDA	TRGLPGEAPGRAALPQQAGLAHPAGLLRGW	0.831942	0.459291	0.645616
HLA-A0301	STHHRSGDLFK	VAVIMCHRLATPLLLGNTEKPLGFYWRVAA	FCHPTHHLQVPGREQWRGQARHQIRAPRRS	0.878878	0.412026	0.645452
HLA-A1101	AVTPCSQCPR	GRVCMAPPGCLLSSSPDGPTKGFFFVPSEK	PVSQPPSASTPA	0.806703	0.483682	0.645193
HLA-A2402	YFIVTRQL	AWLTWWVYSWDIMEPVTYFITFANSMVFFA	LRVGNFFSSSTRNQSNSTLMCSNTTS	0.979525	0.310858	0.645191
HLA-A0301	LLWGGKGHRR	PHQKKQTRASVVIPVTGDSEGATVQVKFSE	LFHHSLLLRMSSLLSNALLPADTS	0.943814	0.34569	0.644752
HLA-A1101	ALQEMGSKKK	AREVSKKPASGPGAVVRPPKAPEDFSQNWK	PKIIQQNKKETSPQVKGEEMPAGKDQEASR	0.885769	0.402903	0.644336
HLA-A0201	LLIPPLRFLI	QQDLVSTVNVVYSQTTQPVYNAPRACFQGP	MRLVKFQKITFQFNLHILSLKHLVTLRLNL	0.883846	0.404656	0.644251
HLA-A0301	SSWPWTSR	LERWRGWRKRGRASRTRWPATCRSTRTCSM	SPPTGSC	0.885624	0.401813	0.643718
HLA-A0301	SLYQILLQV	CLKLFFQLCPVIQYWLKPPKLIKLVLQCCI	KTCCTLHLYQFLMCRLLLICTLLHFKV	0.930981	0.356391	0.643686
HLA-A1101	KVFMLFVSH	LPALRAWCRTIAGDLVWAFGGKKTLAFCVT	LSGLMFFNL	0.800265	0.486344	0.643305
HLA-A1101	ATSGWWNTVY	GRPSLPGSTASASAASSWCPLCFTPSPGRR	TCSTGWSSISS	0.603531	0.682954	0.643243
HLA-A1101	QQFVQSSTFK	GTNASETPATRMSIIQTDNFPAEPNYMGSR	DPERASLRDSGHGDSDQADSDQDTNKGSCC	0.669522	0.616908	0.643215
HLA-A1101	LAHPAGLLR	HLGPAVQAVPRTRGLPGEAPGRAALPQQAG	GWPRPSPAPQGGL	0.583659	0.702713	0.643186
HLA-A0201	ALEEAAAETSL	EVTIRCILGQPSHWNGPLPVCKVNQDSFEH	EGGNMALAIFIPVLIISLLLGGAYIYITRC	0.891567	0.394778	0.643172
HLA-A0201	LLFACPYIL	MPARS	PLLLGLSRFLVSYSDSHPF	0.455289	0.830861	0.643075
HLA-A0201	FLLPKQNHLWV	M	FPEKPVPAPKASWLEETRPNPFAALTGGSN	0.991522	0.29419	0.642856
HLA-A0101	LCEIDPYSY	IRLVKRCTKPDRKDCHGNSNRICYNGIHWL		0.826033	0.459363	0.642698
HLA-A2402	YFMRPQLL	LRLNLCLVQTQSQHPLTLLLVKCYLLQLSS	LVLKYCYNLPFRLLMLTPCLKLFFQLCPVI	0.974249	0.310988	0.642618
HLA-A0301	YVREIKSSGK	KGDIIYVTRVEEGGWWEGTLNGRTGWFPSN		0.734	0.550737	0.642368
HLA-A1101	RAPFNPLQR	DTTDYVAYVAKDPVNRRGSRWSGGMTFAGR	YIFIYLFSVSTETLPRS	0.567226	0.717485	0.642355
HLA-A0101	STDYGRHPF	NGRPRSNSWQGNLGGNKKKIRGKRFRPRSN		0.396163	0.888014	0.642089
HLA-A0301	YLRDVSTFQK	NFLLVNGFQTAIDIFEDRIRGIDIIKWMER	PEFVFW	0.643733	0.640164	0.641948
HLA-A2402	GWPQVILPPW	IVSEEPWKENISCSSTTFIKSTICLKMGCP	SPKAQRLQV	0.872517	0.411089	0.641803
HLA-A1101	ATPLLLGNTEK	KEQGQALREFFDSLNEAIMRLVAVIMCHRL	PLGFYWRVAASTHHRSGDLFKFCHPTHHLQ	0.825973	0.457248	0.64161
HLA-A1101	TVPTGGLK	IHLITRMFECDVCHKFMKTPEQLLEHKKCH		0.897512	0.385071	0.641292
HLA-A1101	LLCQSVHVK	NQELSSNIVEVVQSSPVERPSTSTAVFGTV	RKRIAP	0.687936	0.59396	0.640948
HLA-A1101	ALPSTVLRR	LQNWPRANITLQLSCTRAMCVSATTQAATP	STMGNSTPLSWLPLTRW	0.795825	0.484407	0.640116
HLA-A0301	RVLHPQEK	RNLRQDEKKTKTKTKTEELPLSSVTPWIDL	QASMTPPMLLGNPFLLPPNEIGSHSCQSFD	0.954867	0.325334	0.640101
HLA-A1101	EANGSSAVMK	NKETRVRAGELDQALGRPFTLSISNQYGDD	S	0.469562	0.810069	0.639815
HLA-A0101	LTDQTGNLLRK	ICEKTVLKRVLKELWKLVMNTMEKTIVLPP	HGKGLEKGRVKLPSHSDGTQMIFNAAKELG	0.938881	0.340721	0.639801
HLA-A2402	IMSAVPFLI	LAFMLVEGNFVLFCTYTLGFRNEFQNLLLA	LVALMESNLIITYAVAVAAGISVAAAFLLP	0.845022	0.43424	0.639631
HLA-A0301	SLPLLALPR	MSMPSLPPRRLWMAPPGNCGVMAAGLSRTS	LWARSSLS	0.846932	0.432282	0.639607
HLA-A1101	FTVFSGITLTK	WGISLNAVSLVNLVMSCGISVEFCSHITRA	FGGIVVLAFAKSQIFQIFYFRMYLAMVLLG	0.839111	0.43937	0.63924
HLA-A2402	KYKTISYGLSI	SIFIYKRKLCSTTHHVNLAKWIVRLINRYI	NKFGNVGLIDIHPNCI	0.935056	0.343141	0.639098
HLA-A0201	YTGKHITYI	CIQLLCVCRLDWANGYYRQQRKLVEEIGWS	MRFSRNFYCFVSIFIYKRKLCSTTHHVNLA	0.37596	0.901882	0.638921
HLA-A0101	FTQCHTYTGY	KCRLERAQALEQAKKPQEAVFVPECGEDGS	CWCVTPDGKPISGSSVQNKTPVCSGSVTDK	0.54191	0.7357	0.638805
HLA-A2402	RWWPSSTCL	RTSWTGSSTGSGCWWCTTRSCGAAWCPRYG		0.33423	0.943112	0.638671
HLA-A0301	SVTPWIDLR	AWHDVRVTRNLRQDEKKTKTKTKTEELPLS	VLHPQEKQASMTPPMLLGNPFLLPPNEIGS	0.924932	0.352061	0.638496
HLA-A1101	AVVPALPGLPH	LEGARPPPERVLALSFRAPQVQSCTPRARE	GARPPSRGLGAARPR	0.910409	0.366558	0.638483
HLA-A2402	QQLGKVVLW	RLYIQVFLKKDDSVGYRALVQTEDHLLLFL	SREESLAEVVCLEMVDLPLTGAQAELEGEF	0.694714	0.580918	0.637816
HLA-A2402	AYQERNGRL	CGGLDARYNISVINGTSPFAYDYDLTHIVA	MENETNTNTAEKQTKEKAF	0.755745	0.519235	0.63749
HLA-A1101	EMALLPHLRK	SNGVERAGPEQELTRLLEFYDATAHFAKGL	HSFLPVL	0.794981	0.479826	0.637404
HLA-A2402	HFPDGTLF	MQSQYPALPHDTAISGPLHYAPYHRSSAQP	DEQYSQTASYPSHSPLARGALSQHVLHKPV	0.992866	0.28094	0.636903
HLA-A0301	RLGLGNGHYR	MGECAGGRVHLAQ	KKMNVPRPQTASFPALFPPRLASPAPRPLV	0.428289	0.845444	0.636866
HLA-A0201	TTVDEVQAV	KNLNFSTRYKFYFYAQTSAGSGSQITEEAV	NPRISNLTAAAAETYANISWEYEGPEHVNF	0.742162	0.531283	0.636723
HLA-A1101	QVWLTTLTR	FLQFRLNKSSEDFSAIDYLLFSSFQEFLQR	GQLPKKVLNCFLWSLNGKILSSRKSKI	0.683796	0.589329	0.636563
HLA-A1101	ATLNACPGR	QSGGEPGPVGEQQPAHPPPSDPSWPHSLLP	REQLLNLPVNCPFPRPSPGLPAECHSPAGV	0.646344	0.626406	0.636375
HLA-A0201	SLPEVYSVAQA	MQVSSLNEVKIYSLSCGK	GVQWHNHGSPQP	0.467722	0.804224	0.635973
HLA-A1101	KVTYFFPVY	QAAPSGLRSQVQFNVEVLCQELTANIVKLE	GGSHSSACWLP	0.870768	0.400797	0.635782
HLA-A0201	AVWVLANTV	LEETSGLKILQTGVGSVSNRRGAVCSAICS	RTEAGPAG	0.570349	0.701164	0.635756
HLA-A0201	LLGLSRFLV	MPARSLLFACPYILPL	SYSDSHPF	0.635903	0.635118	0.635511
HLA-A1101	SAAKVLTR	AHVDQRSREVLQMWSVLQDGPISRVIVFSL	RGNPSTLGGRSGRIT	0.939104	0.331874	0.635489
HLA-A0201	EMSNLILTTV	TTISSFVGAWLGALPIPLDWERPWQGAWYC	VQGRFYSHFIH	0.605701	0.664934	0.635317
HLA-A0201	QLLADNIWL	SMVLILGCITCFSLFFFCNTATVYKICAWM	CCPGCSAVA	0.672326	0.597926	0.635126
HLA-A1101	GSAQRPLSPR	KLIEIENFKSYKGRQIIGPFQRFTAIIGPN	IGTLQLLSTLLWRRHF	0.871941	0.398057	0.634999
HLA-A0201	FSVAVPTTI	LELRALQTLSLGGNQLQSIPAEIENLQSFL	CGVQ	0.450092	0.819886	0.634989
HLA-A0201	FISEDEKQEL	IRPMDGCLHVGIEGQNHGRQLLPARGPQHP	CISGGFQSRKHGYEPRMFCVTTVCKKTQIQ	0.849895	0.419983	0.634939
HLA-A0301	ASSMYILFH	LPQELFAVDPTTVSQGLKDEVLYKCRKCRE		0.790658	0.479213	0.634935
HLA-A1101	SIPAEIENLQR	LSGNCFQEVPASLLELRALQTLSLGGNQLQ		0.743626	0.525401	0.634514
HLA-A1101	AAYLPGVCH	HGAVGVREGRVQWISMAFESVSPGSLTGCH	L	0.593964	0.674448	0.634206
HLA-A1101	AAAGGSERALR	GAEAKLENAEVLELTVRRVQGVLRGRARAR	CRLHPVHARGAHVRVHVPGHRRYRRCRAPE	0.932861	0.335261	0.634061
HLA-A1101	AAAGGSERALR	EVQAKLENAEVLELTVRRVQGVLRGRARAR	CRLHPVHARGAHVRVHVPGHRRYRRCRAPE	0.93283	0.335261	0.634046
HLA-A0101	PSDPAGQAAF	PGAHPRGGRCPPAETALFREAEEGTQKYSL		0.976611	0.289068	0.63284
HLA-A0301	RVRINVPPH	PRAEQRNFLRSSGTSQPHPGHGYLGEHRCH	RGLLWALSR	0.721302	0.544225	0.632764
HLA-A0201	ALKGGKATL	NRDLAHDSEELFQDLSQLQETWLAEGKAKF	EGERKEVLNLLS	0.822331	0.442421	0.632376
HLA-A0301	GTSGISGTSIK	EENKGHQMLAGAAQAASVRRSKGSRTPSRA	AWAWLWMTPMRTTAGTRATPSSPA	0.592529	0.672179	0.632354
HLA-A2402	VWEHLYNRW	TNQTFLCSHGGIPPHKYHYIDDLVVILPQN	RSRHWPSAGGSRSTPSSS	0.777245	0.487194	0.632219
HLA-A0301	ELLRFPDQLK	LIVLEGVDRAGKSTQSRKLVEALCAAGHRA	SANF	0.782761	0.481184	0.631973
HLA-A0201	GQADASLMEL	MQAAVAVSVPFLLLCVLGTCPPARC	EKRKENRFVERQSIVPLRLIYRSGGEDESR	0.491348	0.772578	0.631963
HLA-A1101	ALIPGTAARRR	AAGDTRGRPWDPARHPTRTRCPRRLRAAER	LHAVPVHGHVGLRGAGGVTGPLPGHGLQLP	0.973055	0.290796	0.631926
HLA-A2402	CYSRKSFISL	MAAGGSDPRAGDVEEDASQLIFPKA	SWPVWPTFAQRLLRSPRL	0.914435	0.349006	0.63172
HLA-A0301	GKFTGAMGK	AASPPRGPLHTTDPQGSPQAQTGSQNFGKS	AQSPQKGATEPQAGFRCPQSPRATGIATDP	0.663103	0.600219	0.631661
HLA-A0201	KMPSTSLSL	LQKRSFAELSMVGQASISGSEDITTSPQLS	ASGGGGGEKSKLRPKELPRGEISWRWLPSF	0.471188	0.791317	0.631252
HLA-A0301	RSLPSLVK	LTTYKSEIKYSCQEPYYKMLNNNTECGQPS	RIIGGRNAEPGLFPWQALIVVEDTSRVPND	0.982196	0.280217	0.631206
HLA-A0201	ALDVQRTVHI	RLLIARRSRKGFFAQPDRATLWQVPQPGTS	CQQ	0.679167	0.583156	0.631161
HLA-A0301	TQYFLPIQTQK	GGMTGSHHTRSSSAMTVGPGGEVGTTAVGW	LQC	0.873199	0.389071	0.631135
HLA-A0201	ALAWLTWII	QVKAGIEAHSEAKTSGLLWAGLALLSIQGG	LTQLLRVGNFFSSSTRNQSNSTLMCSNTTS	0.451137	0.810955	0.631046
HLA-A1101	TASPVAMWR	WQMVWWGWMTLGRVRSCGSGQAMTMWDGAT	WSLSLTG	0.672907	0.588741	0.630824
HLA-A0301	KTITAEDFRKY	KEMEQIVEEEEKFKKQWEEDWGSKEQLLLP	EEGFDPYSMFTPEQIMGKDVRLLRIKKEGS	0.939895	0.321227	0.630561
HLA-A0201	TLENGSLVEI	LRVDKWWGNRKELATVRTICSHVQNMIKGV	RNFLGEKYIRRVRMRPGVACSVSQAQKDEL	0.839721	0.420969	0.630345
HLA-A0201	SLPKDGLHGI	VESDDEKPLDDETVNEDASNENSENDITMQ	VSCTACGQQVNHFQKDSIYRHPSLQVLICK	0.683665	0.576629	0.630147
HLA-A1101	LTRMATSPK	STLRTLWLASPSCCGAQSTRSSSGPLISTT	RRCWPS	0.528811	0.731056	0.629934
HLA-A0101	SVFETNIREY	TLLILGNVSEFQRVVEVLQDSVDFDIDVNA	NKAIRNYTRFDDWYLWVQMYKGTVSMPVFQ	0.387431	0.871964	0.629698
HLA-A0301	VEYGVAGSKK	PRISNLTAAAAETYANISWEYEGPEHVNFY	QFHYPIFNLGDAFFKRLKTFLRIYYGSS	0.975807	0.283576	0.629692
HLA-A2402	RTLPVDQAVF	TGLKPDTTYDVKVRAHTSKGPGPYSPSVQF	AKNFHVKAVMKTSVLLSWEIPENYNSAMPF	0.57221	0.686745	0.629477
HLA-A0301	GTAPPRYR	MRMTSTDYSLSATTHWHVGGLPPARPALWT	APDSPAPTHCPLI	0.973388	0.285385	0.629386
HLA-A0101	FDEQYSQTASY	LPHDTAISGPLHYAPYHRSSAQPHFPDGTL	PSHSPLARGALSQHVLHKPVCAFCEVRKL	0.868832	0.38907	0.628951
HLA-A1101	TLAPAGWTWR	MVSLRLRSNW	IWRKM	0.754959	0.502758	0.628859
HLA-A2402	VWDQEFLKYTL	ILKKWCTHHKDDPPPPEDDENKEKRTDDIP	RKTTVSLQAANYLDIKGLLDVTCKTVANMI	0.982209	0.275054	0.628631
HLA-A0301	TLTRGQLPKK	LNKSSEDFSAIDYLLFSSFQEFLQRQVWLT	VLNCFLWSLNGKILSSRKSKI	0.868592	0.388541	0.628567
HLA-A0301	RLVAVIMCH	SMCFGFVIGNMKEQGQALREFFDSLNEAIM	RLATPLLLGNTEKPLGFYWRVAASTHHRSG	0.689232	0.56737	0.628301
HLA-A0301	FLYDTDRGYY	GESQFVLQLRPSLRGALLSLLDHYEWNCFV	RGYR	0.446599	0.809936	0.628268
HLA-A1101	KISESAKQDFK	ANKALDKARAKNKDVLQAETSQQLCCQKFE	TRRVAAFRKNLVELAELELKHAKGNLQLLQ	0.812621	0.443197	0.627909
HLA-A2402	IFVHIPYL	VTGISNQVSHLFLFLVPFCVICLPDRHDFN	IHKCSLLFHLLPTLPLVICT	0.992316	0.263492	0.627904
HLA-A0301	HLWVFPEK	MFLLPKQN	PVPAPKASWLEETRPNPFAALTGGSNGFCE	0.986137	0.269455	0.627796
HLA-A2402	PYILPLLLGL	MPARSLLFAC	SRFLVSYSDSHPF	0.985093	0.270279	0.627686
HLA-A1101	GLPASHVHPR	RVSGLVPSRFLTLLAHLVVVITLFWSRQHT	GV	0.522793	0.732457	0.627625
HLA-A2402	YLASYVDHF	VVGFCLLVMLFLLKLARHSKFGMKGKKGCV	WLMTNANYH	0.707802	0.546879	0.627341
HLA-A0201	RQFEESEFQA	TFPECNCPDADIQAMEDSLLQIQDSWATHN	LLKRLPDDRFLNSTAISQFWAMDTSLQHRY	0.709857	0.544799	0.627328
HLA-A0101	TSAGEADIRTY	LGITLLSAYMLAELILSTWEGGYNLQCQDL	RKKPMKKDMQEPPAGKEVKNGFSKAYFTAA	0.369684	0.884688	0.627186
HLA-A0201	SQVEPIQPL	NISVINGTSPFAYDYDLTHIVAAYQERNGE	LRTFKVD	0.539949	0.713945	0.626947
HLA-A0301	AVAGTSCGK	LYYVKDIPATLKFFHSLLGTNAKMLIIVVS	STDHAFPRMTSASISHQMTSLRCWTT	0.644554	0.609097	0.626826
HLA-A0301	RVKDARLQRR	APMLEVALTLIDSWCKDHSYVIAGYYQANE	WPPESPRASATLRSSW	0.823317	0.430262	0.626789
HLA-A1101	VCITFLPPK	AEKKLKHRRTSETSISPPGSSIGSPNRVIC	GLLYS	0.940594	0.312843	0.626719
HLA-A0201	SLCSVPVEA	SKLSRNGSVFVRGQRLSVEKATIRPAKSMD	TKMHSTGTGSSCDLTKQEGEWGQEGMPPGA	0.464096	0.789213	0.626654
HLA-A1101	LLMLTPCLK	VKCYLLQLSSYFMRPQLLLVLKYCYNLPFR	LFFQLCPVIQYWLKPPKLIKLVLQCCISLY	0.646705	0.606434	0.626569
HLA-A0301	RVRESGHKGK	SRSVPPGRGALPPDSLSTRKGLPRPSTAGH	SSCFPATKSSCHGCHSQQSAAPQESGSPRT	0.681661	0.571134	0.626398
HLA-A0301	GAWVSTEK	SSSASSEASETCQSVSECSSPTSVSSGSTM	RRKEKREPDPNGGGPTTASGPPAAAEEAQR	0.895389	0.35691	0.62615
HLA-A0201	RMVHMPGNETI	EPELQGYSAYSVSACRLRCEKEAVLQRCHC	CPPNIYIECADHTLDLA	0.767828	0.48441	0.626119
HLA-A2402	EYGVAGSKKQF	RISNLTAAAAETYANISWEYEGPEHVNFYV	HYPIFNLGDAFFKRLKTFLRIYYGSS	0.913638	0.337484	0.625561
HLA-A1101	GDAGGFLWK	ERRNSNVSQARHHHRNGSQKEKVKLLPDFN	AKSREHSQHSDQHNGRT	0.865605	0.385493	0.625549
HLA-A2402	VFSVETVSL	PPPRFDRFSCLSLLSSWDYRCVPPCLANFF	CWPGWSQTPDLVIRPPRPPGVLGLQA	0.639091	0.611936	0.625514
HLA-A1101	HLQDAMSFLK	PRPGGQAPSSPSYENSLHSLKNRVEQQLHE	DVCESRMEDRLDRLDDAIHVLRNHAVGPST	0.624989	0.625789	0.625389
HLA-A0201	TMPEGTTPL	HVLQMKFALAPTASSSTLSNLSQAKKMLPI	ARRSLTSCWTEFASWPTSARKSKLEFSIYP	0.467541	0.78288	0.625211
HLA-A0201	FLFGTRKL	SNAFKTWNRKKPDHIRYQMASFPLPSSYSS	IINLHSSWITCNG	0.999047	0.250901	0.624974
HLA-A2402	SHITRAFTVF	FGVMWLWGISLNAVSLVNLVMSCGISVEFC	SGITLTKFGGIVVLAFAKSQIFQIFYFRMY	0.825661	0.424277	0.624969
HLA-A0101	ATSGWWNTVY	GRPSLPGSTASASAASSWCPLCFTPSPGRR	TCSTGWSSISS	0.477435	0.772205	0.62482
HLA-A0301	GTTDQVPRQK	MASGRRGWDSSHEDDLPVYLARP	YGGMFCNVEGAFESKT	0.73415	0.514487	0.624319
HLA-A1101	RAQDISRLRR	LEHVQTRLREIQPCLAESRAAREKESFNLK	KLEKQRKVEVYADADEILQEEIKEYKARLT	0.7842	0.464391	0.624295
HLA-A2402	LFLVARWAF	RKPGYFSFLDPFSPGVWLFMLLAYLAVSCV	TLIIISSYTANLAAFLTVQRMDVPIESVDD	0.398676	0.849603	0.624139
HLA-A1101	LLRFPDQLK	IVLEGVDRAGKSTQSRKLVEALCAAGHRAE	SANF	0.547623	0.700331	0.623977
HLA-A1101	WTIEPHPAPR	REQRYLYLGDRASHLGRVGSAPPSHPPSSV	TAPGRLHLLVLQAAQAIVESPPGVQNGASA	0.824286	0.422659	0.623472
HLA-A0201	RLVTSTPEHV	HTHMLGQTTWLKGTRGVGDGNSAATGFCDS	LPETVCSPIGWRPEQCPVPRKSPQER	0.65024	0.596285	0.623263
HLA-A1101	SSWPWTSR	LERWRGWRKRGRASRTRWPATCRSTRTCSM	SPPTGSC	0.584361	0.661821	0.623091
HLA-A0101	EASAYNFY	ILKQYHPVVHPLDLKYDPDPGESVSICGKN	GFLIFF	0.912857	0.3332	0.623029
HLA-A1101	ATEADEATLAR	ELRELRLRLDQLTANSARLEVERDNLAQDL	LDLERKIESLEEEIRFLRKIHEEEVRELQE	0.956226	0.288929	0.622577
HLA-A0201	HLQDAMSFL	PRPGGQAPSSPSYENSLHSLKNRVEQQLHE	KDVCESRMEDRLDRLDDAIHVLRNHAVGPS	0.425467	0.81954	0.622503
HLA-A0101	SYDSSRVQY	TTLGSSQFSGSGIDERGGTTSWGTSGQPSP	TR	0.421595	0.822556	0.622076
HLA-A0301	AVQAVPRTR	LGLGPCARPLPPVVGQGQPPGAGEDAHLGP	GLPGEAPGRAALPQQAGLAHPAGLLRGWPR	0.670961	0.573012	0.621986
HLA-A0201	FLAYGEKGYV	YVGSGWLIKGMDQGLLGMCPGERRKIIIPP	IPPQASLVFHVLLIDVHNPKDAVQLETLEL	0.658007	0.585642	0.621825
HLA-A0201	SLSSQGFLHL	RADAESLLSLCKEGSYLVRLSETNPQDCSL	KFARTRENQVVLGQHSGPFPSVPELVLHYS	0.50083	0.742677	0.621754
HLA-A0301	ALDYVLQGY	RNAQAPRHRPHEVEEATGALTLTRKCFRHL	SLLHQLDPYMKKLAAELDQLVIDSAVEKRE	0.838659	0.404443	0.621551
HLA-A2402	KFFKLQVVPLF	MGFGLYLMDGNVSNIYKLDAKKRINLSKID	GDMQIELARYIKTSAHYEENKSKWTCTQSS	0.993569	0.248887	0.621228
HLA-A1101	GSQSRRTFIK	NDVTLYGMLNTLKNRNPNLKTLLSVGGWNF	SVPPFLRTHGFDGLDLAWLYPGRRDKQHFT	0.816044	0.426015	0.62103
HLA-A0301	ISWFRATNK	SMPQKSFNATAERGEEMTFSCRASGSPEPA	AGEDEKQAFLQVFVQPHIIQLKNETTYENG	0.661871	0.580051	0.620961
HLA-A1101	LTRGQLPKK	NKSSEDFSAIDYLLFSSFQEFLQRQVWLTT	VLNCFLWSLNGKILSSRKSKI	0.596502	0.645281	0.620892
HLA-A0301	VLISWKTTVR	LLSLFTAKYCTRGRSWAAGREQQMERSLLI	RC	0.802528	0.438944	0.620736
HLA-A2402	NLASIHNRF	HATAGPLYSDNSNISRYSEKEKGTYLNSIP	LDNVFLGDRRVFPDIILE	0.734257	0.507142	0.6207
HLA-A2402	PYILPLLL	MPARSLLFAC	GLSRFLVSYSDSHPF	0.997418	0.243916	0.620667
HLA-A1101	ATLNACPGRR	QSGGEPGPVGEQQPAHPPPSDPSWPHSLLP	EQLLNLPVNCPFPRPSPGLPAECHSPAGVC	0.713615	0.527323	0.620469
HLA-A1101	GSGLPCWGR	RVPDCLQWVGRVGGCAWALILCAGPRTQAW	YLGNKERLRDPGSE	0.60568	0.63515	0.620415
HLA-A0201	YAQEHVSRL	TKLQAKHQAECDLLEDMRTFSQKKAAIERE	EIFSRGNNAGSPVSDEYM	0.325983	0.914132	0.620057
HLA-A1101	RVVQRFECY	YAMPTKTIEVLQLQDQGSKMLLDSVLTTHE	VCRNFLGNNPKQSS	0.441427	0.797941	0.619684
HLA-A0101	KAQLPSLSY	GPQCRPSQCCPLTAPAEVEWPWSPHQVILP	SFSSPCSSGSP	0.646599	0.59186	0.619229
HLA-A1101	SLSVFTSVRQK	IRNHKYRSLNDLEKDVMLLCQNAQTFNLEG	IEKEDDSEGEESEEEEEGEEEGSESESRSV	0.845751	0.39265	0.619201
HLA-A2402	KYDPDPGESV	RKILECVIKTIKAKQEILKQYHPVVHPLDL	SICGKNEASAYNFYGFLIFF	0.864431	0.373552	0.618992
HLA-A1101	ILLVILPPR	RALSQEITRDFNLLQVSEPSLENKVQRRKK	GSCCRSIVEDHISAFCLHIGIQIRVCCVCV	0.766489	0.471214	0.618852
HLA-A0201	RMVHMPGNETI	EPELQGYSAYSVSACRLRCEKEAVLQRCHC	CPPNIYIECADHTLGPCCLPFPTSPSASSC	0.75309	0.48441	0.61875
HLA-A0201	FMRPQLLLVL	RLNLCLVQTQSQHPLTLLLVKCYLLQLSSY	KYCYNLPFRLLMLTPCLKLFFQLCPVIQYW	0.636099	0.60111	0.618605
HLA-A1101	TIEPHPAPR	EQRYLYLGDRASHLGRVGSAPPSHPPSSVW	TAPGRLHLLVLQAAQAIVESPPGVQNGASA	0.727665	0.509246	0.618456
HLA-A0101	KNEASAYNFY	QEILKQYHPVVHPLDLKYDPDPGESVSICG	GFLIFF	0.891238	0.3455	0.618369
HLA-A2402	RRGPLYHLW	FHAALTFTVFAGGINRTKYPILCQAVLPRQ	GHGCHEHQELRDRGRGHGVLLDGLGAQPGR	0.776829	0.459853	0.618341
HLA-A1101	LVIDSTSIR	GLTPVFGPYTRPSESELWDMWAGIRNNDGN	GRSSEGAGWELLPL	0.768373	0.468155	0.618264
HLA-A2402	LIPPLRFLI	QDLVSTVNVVYSQTTQPVYNAPRACFQGPL	MRLVKFQKITFQFNLHILSLKHLVTLRLNL	0.921178	0.314096	0.617637
HLA-A2402	TFNLEGSLSVF	KKIKERIRNHKYRSLNDLEKDVMLLCQNAQ	TSVRQKIEKEDDSEGEESEEEEEGEEEGSE	0.961314	0.27365	0.617482
HLA-A1101	TEQHWTLLK	AHSAVAMGKHVYIFGGMTPAGALDTMYQYH	FDTLLPPGRLDHSMCIIPWPVTCASEKEDS	0.826968	0.407768	0.617368
HLA-A2402	FFFSFSLFFF	FLAGFVCHIEKNEVETNADTFCLYGVFLFL	FHFSTLFAFFFCGGGVGRRGCPRENKTHCF	0.80428	0.430114	0.617197
HLA-A0301	RMSVPRAWWTK	RCATSQRGWTSCRPRPSSPRRSCSLSTGAL	TPSNSFTRSSSLREMPPPMHTSSSTPLMRT	0.652557	0.581768	0.617162
HLA-A1101	DSSEVLVAR	MAQLFLPLLAALVLAQAPAALADVLEG	GVRVKVNEAYRFRVALPAYPASLTDVSLAL	0.605753	0.628569	0.617161
HLA-A1101	AVKVLPFFH	RSPTKAPHLQLIEGKTRAPESEGPCTGARD	VNTIASRFSLPSRLPRFPFSQPS	0.886185	0.348125	0.617155
HLA-A0301	RAPFNPLQR	DTTDYVAYVAKDPVNRRGSRWSGGMTFAGR	YIFIYLFSVSTETLPRS	0.686953	0.547113	0.617033
HLA-A0201	AQNLTLPRL	WDGLRLNWTAADNAYEHFVIQVQEVNKVEA	IESPSMG	0.486357	0.747472	0.616914
HLA-A1101	ASAPATMVGH	GRTAPAGTSVQAQPVLPTDSASRGGVAVVP	AWRRRKGSAAYVCLAMGGTCAMLASASATP	0.7475	0.48628	0.61689
HLA-A1101	LTATSCLER	GSDSTTGPSKATSCGRMASPCSMRTGTLGS	TAWSWCGMIRDNGVTCPATTTCPTPARWGW	0.605899	0.62723	0.616564
HLA-A1101	LTSTLQHCR	LYINLISILYHQLGEIPADFFVDIVSQDNF	GCHPEKES	0.731841	0.501186	0.616513
HLA-A1101	VLLCQSVHVK	ANQELSSNIVEVVQSSPVERPSTSTAVFGT	RKRIAP	0.740811	0.492141	0.616476
HLA-A0301	GLMSMPSLPPR	SLKIISNASCTTNCLAPLAKVIHDNFGIVE	RLWMAPPGNCGVMAAGLSRTSSLPLLALPR	0.767057	0.465832	0.616444
HLA-A2402	SYSDSHPF	MPARSLLFACPYILPLLLGLSRFLV		0.983742	0.24882	0.616281
HLA-A0301	QQFVQSSTFK	GTNASETPATRMSIIQTDNFPAEPNYMGSR	DPERASLRDSGHGDSDQADSDQDTNKGSCC	0.787588	0.444302	0.615945
HLA-A2402	SFISLSWPVW	MAAGGSDPRAGDVEEDASQLIFPKACYSRK	PTFAQRLLRSPRL	0.82902	0.402603	0.615811
HLA-A0301	HLRLLRVIGK	NLLNAASKLLGQNWVQNAFDGSCNFFRWLE	TTELATF	0.867784	0.363732	0.615758
HLA-A1101	FADLSHNR	FKISLHCPCCTFVPSNNYIIPNKSEELEAR	PTGGRSVLWMRPIALEMCRIIAAYVHFTLI	0.940152	0.290503	0.615327
HLA-A0101	GSDDLLKYYH	LATNIPKGCAETAVRVHVSYLDGKGNLAPQ	QVTRAVLGDDPQLMKVALQDLQTNSKIGAL	0.935321	0.295028	0.615174
HLA-A0201	RLLMLTPCL	LVKCYLLQLSSYFMRPQLLLVLKYCYNLPF	KLFFQLCPVIQYWLKPPKLIKLVLQCCISL	0.657371	0.572605	0.614988
HLA-A0201	FQDGLHQL	NKLNVEDVDSTKNRKLIDDYDSTKSGLDHK	DGTPLTAEDIVHKIAARIYEENDRAVFDKI	0.998192	0.231231	0.614711
HLA-A2402	SYFMRPQL	TLRLNLCLVQTQSQHPLTLLLVKCYLLQLS	LLVLKYCYNLPFRLLMLTPCLKLFFQLCPV	0.967376	0.261519	0.614448
HLA-A2402	FFKLQVVPLF	GFGLYLMDGNVSNIYKLDAKKRINLSKIDK	GDMQIELARYIKTSAHYEENKSKWTCTQSS	0.696356	0.532418	0.614387
HLA-A1101	LSMDFPFEVTK	EGLGEKTKLNPFKFVGLKNFPCTPESLCDV	PLSLLP	0.912593	0.316048	0.614321
HLA-A0301	KVGDILAPAR	TFRPTMEEFKDFNKYVAYIESQGAHRAGLA	PSISLRRGPADILGPSSASPTGVACARGMC	0.907049	0.320634	0.613842
HLA-A0301	HLQDAMSFLK	PRPGGQAPSSPSYENSLHSLKNRVEQQLHE	DVCESRMEDRLDRLDDAIHVLRNHAVGPST	0.712143	0.515038	0.61359
HLA-A0201	KLLKEIFRC	VSVKVNAGPMAYARAFLEETNAKKYPDNQV	MWAGP	0.775135	0.451918	0.613526
HLA-A2402	RFSLPSRLPRF	TRAPESEGPCTGARDAVKVLPFFHVNTIAS	PFSQPS	0.967245	0.259695	0.61347
HLA-A0201	HLVCQIREV	SSREACSSPRAGWNPAGFRLPGRWSPFVAL	NIRAWC	0.287648	0.939247	0.613447
HLA-A1101	STKQGQVFEY	HCVFNQDSFEHALEGEFQNEKKKSSINQTN	LYLDT	0.540634	0.68605	0.613342
HLA-A1101	SIFIAQSAR	PTSWGLTAYSEKHHWHLCCDSSRTQTEWMT	AELERLRLSEKCDKESVDSSLKERASMVAH	0.671859	0.554495	0.613177
HLA-A0301	DMPSYVPKPK	LEDGTRLVGEDAPKNKDLVEWLKLHPTYTV	QKRHRCRNPNKLDINTLTGEERVPVVNKRN	0.5565	0.669543	0.613021
HLA-A1101	ETWLAEGKAK	KPTNVRKRKFINRDLAHDSEELFQDLSQLQ	FALKGGKATLEGERKEVLNLLS	0.668514	0.557472	0.612993
HLA-A2402	RWSGPLRHLQL	LDYAKIYPDPELEVQVLGLPIRCIHSEEGC	QCHSLP	0.962698	0.263181	0.61294
HLA-A0201	YMMEPGVLRS	DSRLEASSSQSFGLGPHRGRLNIQAWRTAI	RTPIHGFRWTLGTPPASRVLSHRAGTLSGG	0.834311	0.391544	0.612927
HLA-A0301	YMMEPGVLRSR	DSRLEASSSQSFGLGPHRGRLNIQAWRTAI	TPIHGFRWTLGTPPASRVLSHRAGTLSGGM	0.498525	0.726406	0.612466
HLA-A0201	HLAEVPYLRI	EQLLNLPVNCPFPRPSPGLPAECHSPAGVC	LCQLEKGFQDQALQDTECGKVDTRFLFPSD	0.810907	0.41392	0.612414
HLA-A2402	RYIKYKTI	CFVSIFIYKRKLCSTTHHVNLAKWIVRLIN	SYGLSINKFGNVGLIDIHPNCI	0.994646	0.230163	0.612404
HLA-A0201	RMFCVTTV	GPQHPFISEDEKQELCISGGFQSRKHGYEP	CKKTQIQTAGRPDPGGAPERGPDAPGRSQA	0.985594	0.238974	0.612284
HLA-A0201	ALEEKKGNYV	MRPSGTAGAALLALLAALCPASR	VTDHGSCVRACGADSYEMEEDGVRKCKKCE	0.939235	0.285252	0.612243
HLA-A2402	GWHSTLGHAF	QMMREKEELMLRLQDYEEKTKKAERGQAPW	PQSSRGHTHPPTHQEGNQERVPQRRLTAEM	0.677177	0.546212	0.611695
HLA-A0201	KIDKFFKL	LKVMGFGLYLMDGNVSNIYKLDAKKRINLS	QVVPLFGDMQIELARYIKTSAHYEENKSKW	0.979284	0.244033	0.611659
HLA-A0201	FLQQLGKVV	PERLYIQVFLKKDDSVGYRALVQTEDHLLL	LWSREESLAEVVCLEMVDLPLTGAQAELEG	0.715438	0.50741	0.611424
HLA-A0201	ALPTHPVYNI	TCYCLSGLSIAQHFGSGAMLHDVVLGVPEN	GPDKVIQATTYFLQKPVPGFEELKDETSAE	0.753872	0.468637	0.611254
HLA-A1101	RIQNKKVDISK	LATNTSAPDLKNVRSKVGSTENIKHQPGGG	VSSKCGSKANIKHKPGGGDVKIESQKLNFK	0.941706	0.280618	0.611162
HLA-A0301	AVKVLPFFH	RSPTKAPHLQLIEGKTRAPESEGPCTGARD	VNTIASRFSLPSRLPRFPFSQPS	0.895617	0.32664	0.611128
HLA-A1101	VVRISLEGLLK	SKLNVTSTWNLASPLLSVSVDGTQRTVQVS	SRILVSTCVANT	0.741908	0.480245	0.611076
HLA-A0201	YLNSIPNLASI	YHSCKPHATAGPLYSDNSNISRYSEKEKGT	HNRFLDNVFLGDRRVFPDIILE	0.913423	0.30851	0.610966
HLA-A2402	SYQQAQAQLGL	PGSHLPPLYLDGHVFASQPRLVPQTIPQQQ	RGGLPVSQSQEIFSSLQPFRSQVYMHPSLS	0.884908	0.336786	0.610847
HLA-A0201	RLASSGLLLQT	MGSQEVLGHAA	NAALLNHPLPGQRGLPQSMSQWGHPARLEP	0.926416	0.294986	0.610701
HLA-A0301	LMAEKNVEKK	EVGWKYQAVTATLEEKRKEKAKIHYRKKKQ	IDKYTEVLKTHGLLV	0.847294	0.374036	0.610665
HLA-A0201	RLLRDPGTLRA	AVPVHGHVGLRGAGGVTGPLPGHGLQLPVR	HPPLRQA	0.982363	0.237966	0.610165
HLA-A2402	SYFIPSTVV	VLEFGLGGSSMSTHLRLLVMFIMSAGTAIA	SPFAMIAFLSLDSSLQGLHSVSVCIGFTRA	0.546597	0.673213	0.609905
HLA-A1101	LTDKPLQGTK	GSASRPGHVLPLQAALRPDPKTQTLPCKAK	SNPFPASTPARPPATGLCPQLAPPLGPPAL	0.824013	0.395531	0.609772
HLA-A2402	FFGRQLHTLF	DRRKGDRTLPVRFGNVEAPWRLLLAPMLVM	LVALVMSSTRTTGDWQKFGWMNLKISSTSY	0.735475	0.483465	0.60947
HLA-A0301	KLQAIMSK	GRVNVYHHLVETLKFAKGQRWRLGDPRSHP	LWLGFDLRAAIAAPILHVNSKGCVEYEPNF	0.986343	0.232137	0.60924
HLA-A0301	VIQYWLKPPK	LLLVLKYCYNLPFRLLMLTPCLKLFFQLCP	LIKLVLQCCISLYQILLQVKTCCTLHLYQF	0.673993	0.544437	0.609215
HLA-A1101	MPSYVPKPK	EDGTRLVGEDAPKNKDLVEWLKLHPTYTVD	QKRHRCRNPNKLDINTLTGEERVPVVNKRN	0.785981	0.432367	0.609174
HLA-A0201	KLIRQHGIYYI	FSKLWERTVPTVTTSHCPRKYLTNWRTTSK	VGPC	0.989076	0.228542	0.608809
HLA-A2402	TFLPPKGLL	KLKHRRTSETSISPPGSSIGSPNRVICVCI	YS	0.61572	0.601532	0.608626
HLA-A1101	ADAPSVSK	SSLIQANVTVGTCSGFCSQKGSRAKRTTGG	PTRVAGGRLRCLIQPSC	0.967399	0.2491	0.60825
HLA-A2402	RFWRDQPSL	YCNNKLRATMMKALGTDHTRIYGQAKMKTK	QMQGRPLTAQG	0.35344	0.862179	0.60781
HLA-A2402	AMADSAWTW	ECTCPRGFYGLRCEAPTVRRGWTGAACSHA	ATPCAAAAAPASRVLAASTTWTTARAAPAL	0.339072	0.876526	0.607799
HLA-A2402	TFPKVALDML	ILRSSFGKQYMLRRPALEDYVVLMKRGTAI	NPHVTLPVFYPHLKHGGVCAVYVVNITQVI	0.565429	0.649229	0.607329
HLA-A1101	ITVGWMPACR	PAEEGDFWAESSMLGLKITYFALMDGKVYD	YLPRYPQSPLSHLIWFSDSRHQRAAESHPR	0.550145	0.66406	0.607103
HLA-A0201	FVFSVETV	LPPPRFDRFSCLSLLSSWDYRCVPPCLANF	SLCWPGWSQTPDLVIRPPRPPGVLGLQA	0.997314	0.216854	0.607084
HLA-A0101	GTTHGGPRGY	FPLDLIVSRCRLPTLACLGPGPGAPSRSAD	ARRLHGARGPFGGRGVLLGWGMGGSRGWQP	0.905535	0.308477	0.607006
HLA-A0301	AVLTPFER	FCTTLPPSFLRVDDRATSSTTDSSRAVSEM	VRRDPPVCTVSYQRF	0.988802	0.225044	0.606923
HLA-A2402	NQVSHLFLF	TGIGYEVMVSGFTQGHQTKPLRAEIVTGIS	LVPFCVICLPDRHDFNIFVHIPYLIHKCSL	0.698459	0.515275	0.606867
HLA-A0301	SMDFPFEVTK	GLGEKTKLNPFKFVGLKNFPCTPESLCDVL	PLSLLP	0.578344	0.635121	0.606733
HLA-A0101	SSSFRPLILVY	VEWVGEEKENWPCLTYVFSCSLYPSTPLPV	SNCRKTYIVNDRPPCFQFCDREERHWGYRE	0.949123	0.264251	0.606687
HLA-A0301	RINVPPHR	AEQRNFLRSSGTSQPHPGHGYLGEHRCHRV	GLLWALSR	0.988438	0.22404	0.606239
HLA-A1101	GTGPSTLR	TPSNSFTRSSSLREMPPPMHTSSSTPLMRT	TLWLASPSCCGAQSTRSSSGPLISTTLTRM	0.756541	0.455934	0.606237
HLA-A1101	SLASGGGGGEK	ELSMVGQASISGSEDITTSPQLSKMPSTSL	SKLRPKELPRGEISWRWLPSFESLRWSQKM	0.715444	0.49702	0.606232
HLA-A0101	GIDHDVTSGW	SYLEQIHRGVKGFVRDLQGNPIANATISVE		0.8477	0.36428	0.60599
HLA-A2402	QLPPPRFDRF	EPWVICSVSEDNIMQVWQMAGVQWCNLGSL	SCLSLLSSWDYRCVPPCLANFFVFSVETVS	0.659617	0.552206	0.605911
HLA-A1101	AVSGELSR	QVPPGWKQWAREFSEQLSSSRGDGRRVECF	RLGSAGGADRHGCAGGNSTGADQPRPV	0.89144	0.320138	0.605789
HLA-A2402	EYRQMVRLL	GARRASWRIISSIEQKEENKGGEDKLKMIR	CHHPPLSTV	0.403969	0.807609	0.605789
HLA-A1101	AVSGELSR	QVPPGWKQWAREFSEQLSSSRGDGRRVECF	RLGSAGGADRHGCAGGNSTGADQPRAVHHQ	0.891362	0.320138	0.60575
HLA-A0301	SLWVLAEGGK	RILLLGPQESNNSTGTMWKVSALLFVLGSA	L	0.877254	0.334127	0.605691
HLA-A2402	RGILKVLLF	GYPGITEELLRSQLYPEVPPEEFRPFLAKM	SVVSGLEQNPLAAGFRLSPPCLPLSSQAER	0.734927	0.475902	0.605415
HLA-A0201	SLLQVPHRLL	SYCLIDSFLGDSELIGDLTQCVDCVIPPEG	TLTLLPSLELCLLCGPSPPLSQLYPQLLER	0.823388	0.386943	0.605165
HLA-A0301	NLYSLSPPGR	LFTAPEKKNLFLIGWKLSTCLAWGLWKSAV		0.872124	0.337699	0.604912
HLA-A0201	YLASYVDHF	VVGFCLLVMLFLLKLARHSKFGMKGKKGCV	WLMTNANYH	0.518763	0.690285	0.604524
HLA-A0301	SLWVLAEGGK	RILLLGPQESNNSTGTMWKVSALLFVLGSA	TQRKWLPAVADGDERAETCWNARAWYSRLS	0.893165	0.315688	0.604427
HLA-A0201	ALDAGTAKA	YERLKKSLANAESQQQREQLERLRKDMGSV	YLLCCTLLI	0.497865	0.710744	0.604304
HLA-A1101	SGISGTSIK	NKGHQMLAGAAQAASVRRSKGSRTPSRAGT	AWAWLWMTPMRTTAGTRATPSSPA	0.661378	0.547035	0.604207
HLA-A0101	TTAVGWTQY	RAGTLSGGMTGSHHTRSSSAMTVGPGGEVG	FLPIQTQKLQC	0.658638	0.549582	0.60411
HLA-A0201	CLYLETINL	LQGNPIANATISVEGIDHDVTSGGMVITGD	QPQLQAIWQ	0.76866	0.43911	0.603885
HLA-A0301	SVGEIVTR	RGCPRENKTHCFNLALNQPKNNFKCKCFRV	NQQMSGKENSLTEIWLMIQKNSFKI	0.992355	0.215224	0.603789
HLA-A1101	SDRSIFSGIGK	SAGKRKTEPSAWSQDTGDANTNGKDWGRSW	KC	0.671412	0.536112	0.603762
HLA-A1101	GTVPGGSLY	YCLEVQTRCPFILPDNDEVIYGGLSSFICT	TSLRWFCFLV	0.628224	0.579257	0.603741
HLA-A0201	SLYPSTPLP	MMVEWVGEEKENWPCLTYVFSC	VSSSFRPLILVYSNCRKTYIVNDRPPCFQF	0.632012	0.575253	0.603633
HLA-A0201	SALSFLQTL	EPGQEYNVLLTAEKGRHKSKPARVKASTGE	G	0.4109	0.796137	0.603518
HLA-A1101	VHIPYLIHK	GISNQVSHLFLFLVPFCVICLPDRHDFNIF	CSLLFHLLPTLPLVICT	0.836124	0.37067	0.603397
HLA-A0101	FADLSHNR	FKISLHCPCCTFVPSNNYIIPNKSEELEAR	PTGGRSVLWMRPIALEMCRIIAAYVHFTLI	0.85055	0.355795	0.603172
HLA-A1101	ASISHQMTSLR	NAKMLIIVVSAVAGTSCGKSTDHAFPRMTS	CWTT	0.87065	0.335672	0.603161
HLA-A0201	QLWDIAGAL	DSFSKHYKSTVGVDFALKVLQWSDYEIVRL	HLYDTIVLSGCLCLCYYV	0.442056	0.764124	0.60309
HLA-A0201	MAWWIVTGV	VQVGVEFEANTRLQDTTFSFGYHLTLPQAN		0.243224	0.962371	0.602797
HLA-A0301	HLGPAVQAVPR	LSGDLGLGPCARPLPPVVGQGQPPGAGEDA	TRGLPGEAPGRAALPQQAGLAHPAGLLRGW	0.817226	0.38825	0.602738
HLA-A0101	ENEKVFSY	PDSQIPRRYYSLGEIRNVETNQCLDNMGRK	TADKEIRTDDLCLDVSRLNGPVIMLKCHHM	0.934694	0.270641	0.602668
HLA-A0201	RLPGRWSPFV	FSQRFVRAGPACSSREACSSPRAGWNPAGF	ALHLVCQIREVNIRAWC	0.489152	0.715727	0.602439
HLA-A0301	QLPNSFIMR	KSGEPAGSPAAEWFGTPRSRTSPSPSSAAS	S	0.840525	0.3643	0.602412
HLA-A2402	AYDSVPSCHSI	PVYEHNTMVGSAASQSFPPPLMIKQEPRDF	YMRQEGFLAHPSRTEVKLSTTEIPCKYRSE	0.656297	0.547696	0.601997
HLA-A1101	WSYTALNQK	LACIQLLCVCRLDWANGYYRQQRKLVEEIG	NWGKKYPTCNSPKQSPINIDEDLTQVNVNL	0.495236	0.70778	0.601508
HLA-A0201	YVPSADDVQV	LLARRTYYSGDLLFSVDILRNVTDTFKRAT	SPGSVHLLRVVEDFIHLVGDALKAFQSSLI	0.768108	0.434613	0.60136
HLA-A2402	AYDSVPSCHSI	PVYEHNTMVGSAASQSFPPPLMIKQEPRDF	YMRQEGFLAHPSRTEGCMFEKGPRQFYDDT	0.654929	0.547696	0.601313
HLA-A1101	LSVFPLQERK	ATGKAEGAGFATTQTPLWLLGEVEAPRGGR	RGRDEELFL	0.940435	0.261765	0.6011
HLA-A1101	ESDTLTIGK	CRNSSSTVSYLKKEDSVSQSSSDAGLGSDH	DSGVSYSGGA	0.818361	0.383492	0.600927
HLA-A2402	NMPAPTWGW	RNEPEYNISQPGTEIFNMPAITGTEARRCR	RP	0.298616	0.901758	0.600187
HLA-A2402	VFLFLFFFSF	LLHSKFLAGFVCHIEKNEVETNADTFCLYG	SLFFFFHFSTLFAFFFCGGGVGRRGCPREN	0.953275	0.246591	0.599933
HLA-A0201	VLGESPVSA	REPVTLGAWTRVSLERNGRKGALRVGDGPR	LGREGTPAAACSSSSGGSPAPAGAHGAVFL	0.585127	0.614043	0.599585
HLA-A1101	EGMSSVFFNK	VNVLPGSGSLVGQRLSDHPDVRKIGFTGST	GENCIAAGRLFVEDSIHDEFVRRVVEEVRK	0.567759	0.631131	0.599445
HLA-A1101	ITNLVEKGRK	AYIAAQGPLKSTAEDFWRMIWEHNVEVIVM	M	0.821409	0.377177	0.599293
HLA-A0201	VLSKWIMEM	ALVMSSTRTTGDWQKFGWMNLKISSTSYPQ	CQSEKH	0.389917	0.808517	0.599217
HLA-A0201	FLFLVPFCVI	VMVSGFTQGHQTKPLRAEIVTGISNQVSHL	CLPDRHDFNIFVHIPYLIHKCSLLFHLLPT	0.569849	0.628436	0.599142
HLA-A0301	RTPQPAQPR	AALCPASRALEEKKGKGVSRRLPRRPRIAP	TGAPARRPRPRPSFPVSLRSAAPPTGTAGG	0.588257	0.60952	0.598888
HLA-A0201	QLLALRLAL	LRRQEEQRSRLSRARQNLSQVPEADSVSFL	EDGCGPGPGPPRELSFTKSSQAVRAVRDML	0.828565	0.369169	0.598867
HLA-A2402	PWSPHQVIL	KIILEELPQQGPQCRPSQCCPLTAPAEVEW	PKAQLPSLSYSFSSPCSSGSP	0.858247	0.339325	0.598786
HLA-A0301	ITFLPPKGLLY	KKLKHRRTSETSISPPGSSIGSPNRVICVC	S	0.965715	0.231437	0.598576
HLA-A0301	LIFPKACYSRK	MAAGGSDPRAGDVEEDASQ	SFISLSWPVWPTFAQRLLRSPRL	0.933363	0.263707	0.598535
HLA-A1101	VVQGRFYSH	WLGALPIPLDWERPWQGAWYCEMSNLILTT	FIH	0.687955	0.508941	0.598448
HLA-A2402	MLQTTWPQF		CQFQNVI	0.549842	0.647054	0.598448
HLA-A0101	MTWMNILSYY	SGKGKKKKNQASLKIHLLLKEWRLMKLLTL	MKIFLTKFGVLL	0.689475	0.507357	0.598416
HLA-A1101	MSSWPWTSR	DLERWRGWRKRGRASRTRWPATCRSTRTCS	SPPTGSC	0.453679	0.742833	0.598256
HLA-A1101	VVWDCIPK	GVKEAVTTLIASGVSIKMITGDSQETAVAI	LPSQSQEKK	0.904316	0.292111	0.598213
HLA-A0101	LSLEVATYRY	EALEQEKQGLQSQIAQVLEGRQQLAHLKMS	ETSPVHPGTQRHTHMLGQTTWLKGTRGVGD	0.68076	0.515527	0.598143
HLA-A1101	ASAAATAASAR	TTWTTARAAPALTAARVWRAAARTAAPARW	TRAPRAPVLTAAAATPTSPASSALALPATW	0.840345	0.355861	0.598103
HLA-A0301	QYFLPIQTQK	GMTGSHHTRSSSAMTVGPGGEVGTTAVGWT	LQC	0.890539	0.305459	0.597999
HLA-A0301	QTNAALLNH	MGSQEVLGHAARLASSGLLL	PLPGQRGLPQSMSQWGHPARLEPDPQPAVA	0.882775	0.313027	0.597901
HLA-A0201	VLTSALCSV	NGVTQGDRLRALKSRRQSKTNAIPLTCPLA	VIWWIVCDYILPILLFCLDGFRTQ	0.374186	0.82161	0.597898
HLA-A0301	SLSVFTSVR	IRNHKYRSLNDLEKDVMLLCQNAQTFNLEG	QKIEKEDDSEGEESEEEEEGEEEGSESESR	0.814692	0.380712	0.597702
HLA-A0301	KQLNIIQR	QAAAKVDVEFDYDGPLMKTEVPGPRSQELM	LCIFSAITKRAEAITWLMWTATECWIFIPR	0.970631	0.224585	0.597608
HLA-A0201	GLHRFVQAA	IVEPKPDGEPAATREKSARCQGPRSPKTCD	PGPP	0.386463	0.808656	0.59756
HLA-A0301	RTSPHTWK	TVDTYDGRGDSVVYGLRSKSKKFRRPDIQT	ARS	0.966017	0.229061	0.597539
HLA-A0201	SLLFACPYI	MPAR	LPLLLGLSRFLVSYSDSHPF	0.367525	0.826969	0.597247
HLA-A0101	WDQEFLKY	LKKWCTHHKDDPPPPEDDENKEKRTDDIPV	TLRKTTVSLQAANYLDIKGLLDVTCKTVAN	0.924673	0.269464	0.597068
HLA-A0201	YQDRIHCV	CDTMGLDGAEGAGLCMDDIPHILKGCMPDR	AYVLDINSIDNLYSKMLAKVKQVHKEVLNC	0.992675	0.201432	0.597053
HLA-A2402	VYSNCRKTYI	NWPCLTYVFSCSLYPSTPLPVSSSFRPLIL	VNDRPPCFQFCDREERHWGYRELFPLLQWA	0.728986	0.464646	0.596816
HLA-A0301	TSTDYSLSGK	LGLFAWHRRRQKEKGRDLAPRVSYTPAMRM	GHAPGLPPLPLHTHIPQEWLCL	0.738491	0.454933	0.596712
HLA-A0201	SMMGSSFLA	SASQTRSAGQAALGPNTESAKRRPCAGSSR	N	0.278029	0.915199	0.596614
HLA-A2402	LFPAAPAPGL	QARRAGGGDARCLWEACLPHWPQPRLSTLA	EGPLY	0.375546	0.817495	0.596521
HLA-A1101	LAICSLHPK	MEDLEEDVRFIVDETLDFGGLSPSDRSHP	AQHLLLLPDRLPQSGGEPGPVGEQQPVRRP	0.509743	0.683237	0.59649
HLA-A1101	LAICSLHPK	MEDLEEDVRFIVDETLDFGGLSPSDRSHP	AQHLLLLPDRLPQSGGEPGPVGEQQPAHPP	0.509644	0.683237	0.59644
HLA-A1101	LLSWIKTRK	MPYVDILFGNETEAATFAREQGFEKVKSLL	KLLIPMELEMHLLEVFCLNWSLTSL	0.681122	0.511711	0.596416
HLA-A0301	LLSWIKTRKK	MPYVDILFGNETEAATFAREQGFEKVKSLL	LLIPMELEMHLLEVFCLNWSLTSL	0.731435	0.461177	0.596306
HLA-A0201	RTLPVDQAV	TGLKPDTTYDVKVRAHTSKGPGPYSPSVQF	FAKNFHVKAVMKTSVLLSWEIPENYNSAMP	0.535551	0.656959	0.596255
HLA-A0201	ALFPAAPAP	PQARRAGGGDARCLWEACLPHWPQPRLSTL	GLEGPLY	0.680466	0.511881	0.596174
HLA-A0301	LLLSWIKTRKK	VMPYVDILFGNETEAATFAREQGFEKVKSL	LLIPMELEMHLLEVFCLNWSLTSL	0.932994	0.259224	0.596109
HLA-A1101	GAAQAASVRR	PSSAGLGSNSAPPIPDSRLGEENKGHQMLA	SKGSRTPSRAGTSGISGTSIKAWAWLWMTP	0.934878	0.257174	0.596026
HLA-A0301	TTGSSEPITVK	GLPRTMTQKDVEDMFSRFGRIINSRVLVDQ	FAANPNQNKNVALLSQLYHSPARRFGGPVH	0.860037	0.3317	0.595869
HLA-A2402	YYEKGIMQKI	IEPEEVARRWGIQKNRPAMNYDKLSRSLRY	ISVHC	0.899726	0.291997	0.595862
HLA-A2402	QFHYPIFNL	AETYANISWEYEGPEHVNFYVEYGVAGSKK	GDAFFKRLKTFLRIYYGSS	0.709441	0.482022	0.595731
HLA-A1101	SLSVFTSVR	IRNHKYRSLNDLEKDVMLLCQNAQTFNLEG	QKIEKEDDSEGEESEEEEEGEEEGSESESR	0.688416	0.502794	0.595605
HLA-A2402	PFLLPPNEI	LSSVTPWIDLRVLHPQEKQASMTPPMLLGN	GSHSCQSFDSLGVMPTLLPA	0.846414	0.344542	0.595478
HLA-A0301	ALWTGTAPPRY	YTPAMRMTSTDYSLSATTHWHVGGLPPARP	RAPDSPAPTHCPLI	0.925404	0.265315	0.595359
HLA-A2402	TFPAQLRRI	GDAWDTGLQARRGTAAGTSGAPNRSQLSSL	GVSGRKPGAGGRLGPGSRTCAPRCLPRARR	0.689738	0.500858	0.595298
HLA-A0101	LTEPEYVAW	EPIVEMRTEDERVTNHEDGSPVNEPNETTP	SAHLCSNGKLPLKEEDGKEALNPETIEIKV	0.945023	0.245482	0.595253
HLA-A1101	AEGKAKFALK	VRKRKFINRDLAHDSEELFQDLSQLQETWL	GGKATLEGERKEVLNLLS	0.843081	0.346891	0.594986
HLA-A0301	SQSRRTFIK	DVTLYGMLNTLKNRNPNLKTLLSVGGWNFG	SVPPFLRTHGFDGLDLAWLYPGRRDKQHFT	0.517739	0.671871	0.594805
HLA-A2402	IYRETNSF	VPEKSSLFHQEKFWSGEHVWSMHACPCYNF	I	0.997255	0.191978	0.594616
HLA-A0201	TLAPAGWTWRI	MVSLRLRSNW	WRKM	0.758124	0.430827	0.594476
HLA-A2402	SWRPPLKIIL	PTPRERNLASPSPSTLVEAREPHGPLRVPG	EELPQQGPQCRPSQCCPLTAPAEVEWPWSP	0.953048	0.235589	0.594318
HLA-A1101	VLEGDSSGIYR	MAQLFLPLLAALVLAQAPAALAD	CEVQHGIDDSSDAVEVKVKGGLCPHWSPHR	0.886091	0.302501	0.594296
HLA-A0301	TILDCWDPVQK	QALKGILSSPMARAEKSRTAWTDLLRSALT		0.716004	0.47251	0.594257
HLA-A0101	FCDREERHWGY	PVSSSFRPLILVYSNCRKTYIVNDRPPCFQ	RELFPLLQWAPEGKVGGQLTLGEMIGWRRE	0.849264	0.33853	0.593897
HLA-A0301	ASWPTSAR	SQAKKMLPITMPEGTTPLARRSLTSCWTEF	KSKLEFSIYPAPQVSTAV	0.867003	0.320775	0.593889
HLA-A1101	TTTCPTPAR	LGSLTATSCLERTAWSWCGMIRDNGVTCPA	WGWCPVGRHRSCPWLKCSAAHGCAMRWTLC	0.506741	0.680919	0.59383
HLA-A0301	VLAEGGKTQR	LLGPQESNNSTGTMWKVSALLFVLGSASLW	KWLPAVADGDERAETCWNARAWYSRLSRGA	0.788298	0.398717	0.593508
HLA-A0201	WLKPPKLIKL	LKYCYNLPFRLLMLTPCLKLFFQLCPVIQY	VLQCCISLYQILLQVKTCCTLHLYQFLMCR	0.963118	0.223811	0.593464
HLA-A1101	VVGNVLVR	SQGSGILHYAHGDSQQTHLLKQEAPWALVS	KRTHRVLVLKSRDRALI	0.980326	0.20655	0.593438
HLA-A1101	AMGKAQSPQK	RGPLHTTDPQGSPQAQTGSQNFGKSGKFTG	GATEPQAGFRCPQSPRATGIATDPYRDLPS	0.867183	0.319606	0.593395
HLA-A0101	RAAPQRLRY	SARQGERGLPVPRGTACVPSVAHRRLPGAE	LSL	0.881107	0.305598	0.593353
HLA-A1101	ELLRFPDQLK	LIVLEGVDRAGKSTQSRKLVEALCAAGHRA	SANF	0.632353	0.55375	0.593051
HLA-A1101	SLKHLVTLR	GPLLIPPLRFLIMRLVKFQKITFQFNLHIL	LNLCLVQTQSQHPLTLLLVKCYLLQLSSYF	0.491348	0.694259	0.592803
HLA-A1101	GLGNGHYRK	MGECAGGRVHLAQRL	KMNVPRPQTASFPALFPPRLASPAPRPLVS	0.810138	0.374306	0.592222
HLA-A0301	SLLACTAQK	HYWSKNWAKAAAFVTSPPLSPDPTTPDYLT	AVGKDNFTLIPEGVNGIEERMTVVWDKAVA	0.387636	0.796381	0.592008
HLA-A2402	LPPPRFDRF	PWVICSVSEDNIMQVWQMAGVQWCNLGSLQ	SCLSLLSSWDYRCVPPCLANFFVFSVETVS	0.906717	0.27496	0.590839
HLA-A1101	TQKGTVLK	MEENMEEGQ	AFICN	0.990243	0.19065	0.590446
HLA-A0301	TVPTGGLK	IHLITRMFECDVCHKFMKTPEQLLEHKKCH		0.96928	0.21145	0.590365
HLA-A0301	RMFCVTTVCKK	GPQHPFISEDEKQELCISGGFQSRKHGYEP	TQIQTAGRPDPGGAPERGPDAPGRSQAAVH	0.493753	0.686421	0.590087
HLA-A1101	HALEGEFQNEK	SLLTCYSRETGTPIWTSRLPHCVFNQDSFE	KKSSINQTNSTKQGQVFEYLYLDT	0.730552	0.449541	0.590047
HLA-A2402	PHPANFFVF	DLSSLQAPPPGFTPFSCLSHPSSWDYRCPP	LVEMGFHCVSQDGLDLLTL	0.971385	0.208544	0.589965
HLA-A0301	FASWPTSARK	LSQAKKMLPITMPEGTTPLARRSLTSCWTE	SKLEFSIYPAPQVSTAV	0.630228	0.549367	0.589797
HLA-A1101	GIPQPDPNQPK	KIQQLLNTLKRPKRPPLKEFFVDDSEEIVE	PEGRQMTPVKGEPLGVICNWPPALESALQR	0.82415	0.355309	0.589729
HLA-A2402	AHSTFSQSF	FQEWLEQLNRLIRGPASCSSLSKTSSSSCS	SSTGQPRGPLEPPQIIKPWSLSCLRPAPPL	0.427587	0.751715	0.589651
HLA-A2402	PFSVREENLRF	VEHDLSVLDYLSDFICCLYGVPSAYGVVTM	RDASLVFKVAETANEEEVKKMCMYKYPGMK	0.994835	0.184409	0.589622
HLA-A0301	AVLPRPLVACY	TEWASLFRHYSPPPFGLLGTAPAYSFGIAG	AQP	0.738809	0.440097	0.589453
HLA-A1101	AAQAASVRR	SSAGLGSNSAPPIPDSRLGEENKGHQMLAG	SKGSRTPSRAGTSGISGTSIKAWAWLWMTP	0.81343	0.365413	0.589421
HLA-A1101	RVFPDIILE	EKEKGTYLNSIPNLASIHNRFLDNVFLGDR		0.792755	0.385042	0.588899
HLA-A2402	LFTAPEKKNLF	PMSLLSVGKAGDASIFLILTTTGHYSLFPL	LIGWKLSTCLAWGLWKSAVNLYSLSPPGR	0.930776	0.246172	0.588474
HLA-A1101	TLTRGQLPKK	LNKSSEDFSAIDYLLFSSFQEFLQRQVWLT	VLNCFLWSLNGKILSSRKSKI	0.890098	0.286585	0.588341
HLA-A1101	AVLTPFERVRR	FCTTLPPSFLRVDDRATSSTTDSSRAVSEM	DPPVCTVSYQRF	0.996019	0.180526	0.588273
HLA-A0301	HLVMSPVSVYK	EWKKDHISRAFAGASQTHTLTSECPIPAFP	VESNYLSLL	0.892435	0.284089	0.588262
HLA-A1101	TGSSEPITVK	LPRTMTQKDVEDMFSRFGRIINSRVLVDQT	FAANPNQNKNVALLSQLYHSPARRFGGPVH	0.917917	0.258572	0.588244
HLA-A1101	QYFLPIQTQK	GMTGSHHTRSSSAMTVGPGGEVGTTAVGWT	LQC	0.831844	0.344467	0.588155
HLA-A0201	AVHPGVAV	CKKTQIQTAGRPDPGGAPERGPDAPGRSQA	TA	0.982894	0.193284	0.588089
HLA-A2402	TYIFTNLL	TATIIIHANASMSHTILLKAAELGMVSAYY	SSALLFDAVYAVVTAVQELNRSQEIGVKPL	0.998572	0.177572	0.588072
HLA-A1101	TQVPGLHLR	SSPPGDLRPARQQLPPPPPDGLWPAVSGGS	PPARRPLYPGH	0.606257	0.569665	0.587961
HLA-A0201	SLLIFRSSL	MFLISSSVHGSDEHGRLLRRTLMRYVNLT	TMLPMLVLNSWPQAIFPP	0.54001	0.635867	0.587939
HLA-A0201	RLMKLLTLM	LQNRRDSLSGKGKKKKNQASLKIHLLLKEW	TWMNILSYYMKIFLTKFGVLL	0.424549	0.751176	0.587863
HLA-A2402	SFSLFFFFHF	GFVCHIEKNEVETNADTFCLYGVFLFLFFF	STLFAFFFCGGGVGRRGCPRENKTHCFNLA	0.787751	0.387781	0.587766
HLA-A0201	GTAITFPKV	FPGQILRSSFGKQYMLRRPALEDYVVLMKR	ALDMLNPHVTLPVFYPHLKHGGVCAVYVVN	0.396993	0.778153	0.587573
HLA-A1101	TFIKSTICLK	KFIQLSEFGFGQVIIVSEEPWKENISCSST	MGCPGWPQVILPPWSPKAQRLQV	0.534807	0.639977	0.587392
HLA-A0201	RLSGVLGAVFI	SSSGGAPGASASSAPPAQEEGMTWWYRWLC	SQGRLPSGLRLPPC	0.702233	0.472528	0.58738
HLA-A0201	VTLENGSLVEI	RLRVDKWWGNRKELATVRTICSHVQNMIKG	RNFLGEKYIRRVRMRPGVACSVSQAQKDEL	0.921014	0.25356	0.587287
HLA-A0201	KLFFQLCPV	SSYFMRPQLLLVLKYCYNLPFRLLMLTPCL	IQYWLKPPKLIKLVLQCCISLYQILLQVKT	0.332759	0.841522	0.587141
HLA-A0301	ADFEYRTTK	RGRGGGRGGTFTAPRGFRGGFRGGRGGREF	LLH	0.379295	0.794844	0.587069
HLA-A0201	KWSDYILTL	PDEIGPKHWPTSRFAHVMKLRQAALRTARE	NLLIAENKTIVAPMLESRGLYSNFWCGITP	0.734324	0.439737	0.58703
HLA-A0301	AVWLRGLCH	ALAFLSLGAHNTTLTEILKGLKFNLTETSE		0.670465	0.502949	0.586707
HLA-A2402	FFGRQLHTL	DRRKGDRTLPVRFGNVEAPWRLLLAPMLVM	FLVALVMSSTRTTGDWQKFGWMNLKISSTS	0.656433	0.516924	0.586679
HLA-A0201	YLQHRGDHL	QVSFWLNRESVPARTVFEENTSSPSKENQH	SHQPGQGH	0.393946	0.778687	0.586317
HLA-A0301	KLVRWVGK	LSAESGKSEKGQPQNSKKQSPPKKNRALIQ		0.959894	0.212723	0.586308
HLA-A1101	SAAPQESGSPR	GHRVRESGHKGKSSCFPATKSSCHGCHSQQ	TYQV	0.744355	0.42825	0.586302
HLA-A2402	LWMRPIALEM	NNYIIPNKSEELEARFADLSHNRPTGGRSV	CRIIAAYVHFTLISRGI	0.931268	0.241318	0.586293
HLA-A1101	SSFRPLILVY	EWVGEEKENWPCLTYVFSCSLYPSTPLPVS	SNCRKTYIVNDRPPCFQFCDREERHWGYRE	0.850887	0.321407	0.586147
HLA-A0201	QLSEFGFGQV	FYLGCSRTPNVKLSSCLGLPCCWDYSYKFI	IIVSEEPWKENISCSSTTFIKSTICLKMGC	0.750108	0.422097	0.586102
HLA-A1101	KLPSQSQEKK	TLIASGVSIKMITGDSQETAVAIVVWDCIP		0.791496	0.380642	0.586069
HLA-A1101	LTEIWLMIQK	PKNNFKCKCFRVSVGEIVTRNQQMSGKENS	NSFKI	0.876735	0.294622	0.585678
HLA-A2402	LLAPQVFLNF	VICFCLLGITCAIPVKQADSGSSEEKQKQN	S	0.719125	0.451196	0.58516
HLA-A1101	GVMMARWAAR	MCSGA	GRAGWRSTVRILF	0.923808	0.246353	0.58508
HLA-A1101	FVSIFIYK	QQRKLVEEIGWSYTGKHITYIMRFSRNFYC	RKLCSTTHHVNLAKWIVRLINRYIKYKTIS	0.995658	0.174445	0.585052
HLA-A0201	RLMENETNTNT	YNISVINGTSPFAYDYDLTHIVAAYQERNG	AEKQTKEKAF	0.923298	0.246508	0.584903
HLA-A0301	GTFGEYRSLER	IRRNKGGKYPVKEKEDAHADPEIQPMKEDD		0.609833	0.559237	0.584535
HLA-A1101	MSVPRAWWTK	CATSQRGWTSCRPRPSSPRRSCSLSTGALR	TPSNSFTRSSSLREMPPPMHTSSSTPLMRT	0.590265	0.578563	0.584414
HLA-A0101	HIDADGQGF	RTEMKQEREPVGTCFLQDGTKTVEYAPCRS	CQGGFSIDFTKADRVLLGGPGSFYWQGQLI	0.394791	0.773917	0.584354
HLA-A1101	SGWSQTPGLQR	TRVEEGGWWEGTLNGRTGWFPSNYVREIKS	SSCPGLPKCWDYRGEPPCPGFISLNELHTN	0.620966	0.547246	0.584106
HLA-A0301	TLIKAEFIK	SVPPFLRTHGFDGLDLAWLYPGRRDKQHFT	EAQPGKKQLLLSAALSAGKVTIDSSYDIAK	0.702968	0.465091	0.58403
HLA-A1101	AVGGRVETR	AEKDSLDPSFTHALRLVNQGEAPAVNCRPA	GPRGPLRALCCQRTRRRRRPGWPPGSFARG	0.872206	0.295728	0.583967
HLA-A0201	NLLQVSEPSL	LLAGAPAARPTPPTCYSRMRALSQEITRDF	ENKVQRRKKILLVILPPRGSCCRSIVEDHI	0.805379	0.362468	0.583923
HLA-A2402	FFFFHFSTL	HIEKNEVETNADTFCLYGVFLFLFFFSFSL	FAFFFCGGGVGRRGCPRENKTHCFNLALNQ	0.358563	0.808729	0.583646
HLA-A0201	RLHLLVLQA	LGRVGSAPPSHPPSSVWTIEPHPAPRTAPG	AQAIVESPPGVQNGASASCHSGPLKSPM	0.68848	0.478801	0.58364
HLA-A1101	AVHQESRGK	QQHICHSALGESEVREVHSRGWLWGISIWP	GRSSNSYRLSLAEADGWRRTRRHSNLASPE	0.703948	0.463255	0.583601
HLA-A2402	YFNGCFHWIW	ISGGFRSIVEHVASKLNIPATNVFANRLKF	RKCDQATSQG	0.514739	0.650699	0.582719
HLA-A1101	SLAEADGWRR	SRGWLWGISIWPAVHQESRGKGRSSNSYRL	TRRHSNLASPEPD	0.927158	0.238265	0.582711
HLA-A1101	NAFKTWNRK	DFSSDDSKLEYNVDAANGIVMEGYLFKRAS	KPDHIRYQMASFPLPSSYSSFLFGTRKLII	0.594588	0.570454	0.582521
HLA-A1101	NLQEVQHNK	PGDLPSWTRSLNLSYNKLSEIDPAGFEDLP	IRSVEGSQLKAYLSLEVLDLSLNNITEVRN	0.597587	0.567109	0.582348
HLA-A0201	RLWEWESGIEN	WKIFKSDSEVAGYIRQAGDFHQVGRCLGAG	KA	0.797141	0.367053	0.582097
HLA-A1101	YYMKIFLTK	NQASLKIHLLLKEWRLMKLLTLMTWMNILS	FGVLL	0.803859	0.359434	0.581647
HLA-A0301	RALIPGTAAR	AAAGDTRGRPWDPARHPTRTRCPRRLRAAE	RRLHAVPVHGHVGLRGAGGVTGPLPGHGLQ	0.635893	0.527378	0.581635
HLA-A0201	RQMKPPWPV	NLAQDLATVRQKLQDETNLRLEAENNLAAY	WIWRGRLSRWRRRSGS	0.405606	0.757636	0.581621
HLA-A2402	RWAARGRAGW	MCSGAGVMMA	RSTVRILF	0.896329	0.266514	0.581422
HLA-A0201	ALGPNTESA	TQALVSTAWTSMWCWVGQVSASQTRSAGQA	KRRPCAGSSRSMMGSSFLAN	0.321927	0.840791	0.581359
HLA-A0301	RVVQRFECY	YAMPTKTIEVLQLQDQGSKMLLDSVLTTHE	VCRNFLGNNPKQSS	0.370633	0.792021	0.581327
HLA-A0101	FPDGTLFDEQY	QSQYPALPHDTAISGPLHYAPYHRSSAQPH	SQTASYPSHSPLARGALSQHVLHKPVCAFC	0.998402	0.164058	0.58123
HLA-A0301	RTQGERGLSWR	GAPPIFLPSDGQALVLGRGPLTQVTDRKCS	GCGLLQKREQSRGTLGCYAGLQWCSQPRSR	0.844763	0.31735	0.581057
HLA-A2402	DYILTLNLLI	IGPKHWPTSRFAHVMKLRQAALRTAREKWS	AENKTIVAPMLESRGLYSNFWCGITPKGFY	0.964611	0.19747	0.581041
HLA-A0101	SEDTIPSQDY	RGLQLDTQRSSRDSLQCSSGYSTQTTTPCC	DYFSVSGDQEADQQEFDKSSTIPRNSDISQ	0.747962	0.413986	0.580974
HLA-A0201	FICTGEGEVYL	PCKQYCLEVQTRCPFILPDNDEVIYGGLSS		0.488025	0.673441	0.580733
HLA-A1101	GSFARGPGR	GRVETRGPRGPLRALCCQRTRRRRRPGWPP	LWDT	0.667505	0.493665	0.580585
HLA-A0201	AVHPGVAVTA	CKKTQIQTAGRPDPGGAPERGPDAPGRSQA		0.432482	0.728654	0.580568
HLA-A0101	LIDIHPNCI	AKWIVRLINRYIKYKTISYGLSINKFGNVG		0.686964	0.47349	0.580227
HLA-A2402	SYSQWAEF	ANKMSIAWQLPQYALVTAGEVMFSVTGLEF	ILFSCLLLVICLIFSIMGYYYVPVKTEDMR	0.998175	0.161786	0.57998
HLA-A0101	IMDAANFF	PVKKLVVKGGKKKKQVLKFTLDCTHPVEDG	LQERIKVNGKAGNLGGGVVTIERSKSKITV	0.947607	0.212101	0.579854
HLA-A2402	AWNQGGNLSHL	GIVKGDEIMAINGKIVTDYTLAEAEAALQK	SPAHPQPSPSLKEWPKHAASHSQSS	0.978756	0.180442	0.579599
HLA-A2402	SWILPSQSL	CADHTLGPCCLPFPTSPSASSCLCPLFSSL	PGGFFLGVEP	0.359445	0.799424	0.579434
HLA-A1101	FQNGIFSER	RAAVHAGVVRNHGGYVDVMPVDKRKTYIAS	ILQEERHSECLLLC	0.395591	0.762587	0.579089
HLA-A0201	KVIGLGVAAL	YEVQITAANRLGYSEPTVYEFSMPPKPNII	LLILVVTDVSCFFIRQCGLLMCITRRMCGK	0.779567	0.378409	0.578988
HLA-A0301	TQKGTVLK	MEENMEEGQ	AFICN	0.980021	0.177952	0.578987
HLA-A1101	FSVSTETLPR	RRGSRWSGGMTFAGRRAPFNPLQRYIFIYL	S	0.510444	0.647523	0.578984
HLA-A1101	GKFTGAMGK	AASPPRGPLHTTDPQGSPQAQTGSQNFGKS	AQSPQKGATEPQAGFRCPQSPRATGIATDP	0.668265	0.489529	0.578897
HLA-A2402	RYPAADHL	IVSDGKYHVVRFTRSGGNATLQVDSWPVNE	QQPGCHQDRGPGSGPPLPGPGVRPLLQWAQ	0.99512	0.162394	0.578757
HLA-A0201	KLLGQNWVQNA	MIHLSEELGYRCVVFNNRGVAGENLLNAAS	FDGSCNFFRWLEHLRLLRVIGKTTELATF	0.765128	0.392058	0.578593
HLA-A2402	PFNPLQRYI	TDYVAYVAKDPVNRRGSRWSGGMTFAGRRA	FIYLFSVSTETLPRS	0.732852	0.423651	0.578252
HLA-A2402	NYVREIKSSGW	CKGDIIYVTRVEEGGWWEGTLNGRTGWFPS	SQTPGLQRSSCPGLPKCWDYRGEPPCPGFI	0.525063	0.631408	0.578236
HLA-A1101	STHTYTHTH	VLGPAVTFKVSANVQNVTTEDVEKATGEAV	VCAHTHARKHAHAQPGQRETHTTHMGQPRG	0.659672	0.496755	0.578214
HLA-A1101	ASATPAGTPSR	TMVGHAWRRRKGSAAYVCLAMGGTCAMLAS	APATSTFPHEGAGRRQRPSAGCTARIWPAS	0.869944	0.286287	0.578116
HLA-A0201	RLPPVSLV	SAKMLMFVNISPLEENVSESLNSLRFASKV	RTRGWL	0.974598	0.180394	0.577496
HLA-A0201	YMMEPGVL	DSRLEASSSQSFGLGPHRGRLNIQAWRTAI	RSRTPIHGFRWTLGTPPASRVLSHRAGTLS	0.94349	0.211421	0.577455
HLA-A0301	ALQEMGSKK	AREVSKKPASGPGAVVRPPKAPEDFSQNWK	KPKIIQQNKKETSPQVKGEEMPAGKDQEAS	0.533502	0.621329	0.577415
HLA-A1101	DVSVPVASNR	MSGGESIRQPINWAD	R	0.682942	0.471843	0.577393
HLA-A1101	LAVQEVIGNK	RQALEGGIDPLRPPEANTKFNSRWTTDEQL	TLTQVKTFFVSYRRRFNLEEVLQEWEAEQD	0.721834	0.43246	0.577147
HLA-A0301	ASSPAMTHR	VTYTLLRKHRHQTKKSNLRSLADIGKTVSS	NLTSSSLNDISDKPEKDQLKNKFMKKLPRD	0.319899	0.83429	0.577094
HLA-A1101	CFVSIFIYK	RQQRKLVEEIGWSYTGKHITYIMRFSRNFY	RKLCSTTHHVNLAKWIVRLINRYIKYKTIS	0.554054	0.599763	0.576909
HLA-A1101	NAFDGSCNFFR	YRCVVFNNRGVAGENLLNAASKLLGQNWVQ	WLEHLRLLRVIGKTTELATF	0.715927	0.437833	0.57688
HLA-A1101	KTPVCSVTDK	FTQVQCHTYTGYCWCVTPDGKPISGSSVQN	PLSQGNSGRKDDGSKPTPTMETQPVFDGDE	0.534092	0.619106	0.576599
HLA-A0301	KAQLPSLSY	GPQCRPSQCCPLTAPAEVEWPWSPHQVILP	SFSSPCSSGSP	0.577733	0.575044	0.576389
HLA-A0101	DTDRGYYR	QFVLQLRPSLRGALLSLLDHYEWNCFVFLY	GYR	0.852759	0.299894	0.576327
HLA-A2402	PLPSSYSSF	EGYLFKRASNAFKTWNRKKPDHIRYQMASF	LFGTRKLIINLHSSWITCNG	0.757945	0.394415	0.57618
HLA-A0301	ILGTGVEK	VACARGMCFGATPSSFTSACLWSSNNVPGT	WPVQALAPGSWQGVVRTHSHTAVKPRGSGP	0.985166	0.166937	0.576052
HLA-A2402	LWDIAGALHLY	SFSKHYKSTVGVDFALKVLQWSDYEIVRLQ	DTIVLSGCLCLCYYV	0.90916	0.242725	0.575943
HLA-A0301	LSQGFLHLK	ADAESLLSLCKEGSYLVRLSETNPQDCSLS	FARTRENQVVLGQHSGPFPSVPELVLHYSS	0.412654	0.73903	0.575842
HLA-A0301	SLSGKGKKKK	RKVVEECKLIHPSKLNEVEQLLYYLQNRRD	NQASLKIHLLLKEWRLMKLLTLMTWMNILS	0.694731	0.456841	0.575786
HLA-A2402	VHMPGNETI	ELQGYSAYSVSACRLRCEKEAVLQRCHCRM	CPPNIYIECADHTLDLA	0.441946	0.709282	0.575614
HLA-A1101	ILGTGVEK	VACARGMCFGATPSSFTSACLWSSNNVPGT	WPVQALAPGSWQGVVRTHSHTAVKPRGSGP	0.976666	0.174207	0.575436
HLA-A1101	AVLPRPLVACY	TEWASLFRHYSPPPFGLLGTAPAYSFGIAG	AQP	0.775483	0.374225	0.574854
HLA-A0101	SSFRPLILVY	EWVGEEKENWPCLTYVFSCSLYPSTPLPVS	SNCRKTYIVNDRPPCFQFCDREERHWGYRE	0.793772	0.355644	0.574708
HLA-A1101	LPASHVHPR	VSGLVPSRFLTLLAHLVVVITLFWSRQHTG	GV	0.687711	0.461387	0.574549
HLA-A1101	ATCVAEATFR	NDFHCTCPANFTGPTCAQQLWCPGQPCLPP	EGPPAAFSGHNASSGRLLGGLSLAFRTRDS	0.66033	0.487898	0.574114
HLA-A0101	LLSLFTAKY	ISAKSLRGRDSTRKQDASEKDSVPMGSPAF	CTRGRSWAAGREQQMERSLLIVLISWKTTV	0.823051	0.323984	0.573517
HLA-A1101	VQDTCMPK	AAAELQASGGPRHPVCLLVLGMAGSGKTTF	ALHRM	0.790538	0.356253	0.573396
HLA-A1101	RTVPTVTTSH	TSELSFHCPQQPQWCGFHTPLLISFSKLWE	CPRKYLTNWRTTSKKLIRQHGIYYIVGPC	0.551671	0.595051	0.573361
HLA-A0201	HLLEVFCL	EQGFEKVKSLLLLSWIKTRKKLLIPMELEM	NWSLTSL	0.997337	0.149307	0.573322
HLA-A1101	AAATAASAR	WTTARAAPALTAARVWRAAARTAAPARWAS	TRAPRAPVLTAAAATPTSPASSALALPATW	0.736567	0.409979	0.573273
HLA-A0301	RLASCFPK	WMAGGWGVGRSGGSGVQGHPQQGFPSFHHQ	PGVSLWLPSHGAVAAHRGLPWGACCSSSWF	0.960256	0.185789	0.573022
HLA-A1101	FNLGDAFFK	ISWEYEGPEHVNFYVEYGVAGSKKQFHYPI	RLKTFLRIYYGSS	0.655249	0.490373	0.572811
HLA-A1101	SPVHPGTQR	QIAQVLEGRQQLAHLKMSLSLEVATYRYET	HTHMLGQTTWLKGTRGVGDGNSAATGFCDS	0.610103	0.534905	0.572504
HLA-A1101	APFNPLQR	TTDYVAYVAKDPVNRRGSRWSGGMTFAGRR	YIFIYLFSVSTETLPRS	0.980045	0.164867	0.572456
HLA-A1101	FLPIQTQK	TGSHHTRSSSAMTVGPGGEVGTTAVGWTQY	LQC	0.959681	0.185	0.572341
HLA-A0301	KLPSQSQEK	TLIASGVSIKMITGDSQETAVAIVVWDCIP	K	0.622558	0.521746	0.572152
HLA-A1101	TSLESINSR	MVAAKK	LQLVMKSGKYVLGYKQTLKMIRQGKAKLVI	0.610517	0.533486	0.572002
HLA-A2402	RFLDNVFL	YSDNSNISRYSEKEKGTYLNSIPNLASIHN	GDRRVFPDIILE	0.994802	0.149142	0.571972
HLA-A0301	VVWDCIPK	GVKEAVTTLIASGVSIKMITGDSQETAVAI	LPSQSQEKK	0.995375	0.148376	0.571875
HLA-A0101	AEEGTQKY	PRCLPRARRGPGAHPRGGRCPPAETALFRE	SLPSDPAGQAAF	0.967436	0.176017	0.571727
HLA-A0101	GTTDQVPRQKY	MASGRRGWDSSHEDDLPVYLARP	GGMFCNVEGAFESKT	0.854771	0.288634	0.571702
HLA-A0301	ASWPTSARKSK	SQAKKMLPITMPEGTTPLARRSLTSCWTEF	LEFSIYPAPQVSTAV	0.560854	0.582177	0.571515
HLA-A0101	TTDQPGTAM	VALPCLFTLQPRPSAARDAPRIKWTKVLCS	H	0.23662	0.905692	0.571156
HLA-A0201	TQSQHPLTL	KFQKITFQFNLHILSLKHLVTLRLNLCLVQ	LLVKCYLLQLSSYFMRPQLLLVLKYCYNLP	0.511558	0.630262	0.57091
HLA-A0201	ASDTILKV	TPELVPAQDLVCDNASWEQNTNHGAAGVPF	SFN	0.980357	0.161048	0.570702
HLA-A0301	TTLTRMATSPK	GPSTLRTLWLASPSCCGAQSTRSSSGPLIS	RRCWPS	0.664431	0.476906	0.570668
HLA-A0201	KLLMKVRQL	DKIEKSQEAYLLAFEHYVNHRKHNIPHFWP	EQQLGEAGSLQGPVLQHQSPKSPQQRLLEL	0.891911	0.249326	0.570618
HLA-A0201	LLAPQVFL	VICFCLLGITCAIPVKQADSGSSEEKQKQN	NFS	0.998941	0.14194	0.57044
HLA-A1101	EVHTGSVRR	MLRAGAPTGDLPRAG	KAYSEERPLGPE	0.476007	0.663589	0.569798
HLA-A0201	GLGNPMAVV	LLEARDRVGGRVATFRKGNYVADLGAMVVT	SKQVNMELAKIKQKCPLYEANGQADTVKVP	0.52233	0.61657	0.56945
HLA-A2402	LYRKPNGLVLM	DLAVAPLAITYVREKVIDFSKPFMTLGISI	SGIIHTLATLTQTWWKTILPC	0.909327	0.229486	0.569406
HLA-A0101	FETNIREY	LILGNVSEFQRVVEVLQDSVDFDIDVNASV	NKAIRNYTRFDDWYLWVQMYKGTVSMPVFQ	0.923174	0.215619	0.569397
HLA-A0201	GLGNPMAVV	LLEARDRVGGRVATFRKGNYVADLGAMVVT	SKQVNMELAKIKQKCPLYEANGQAVPKEKD	0.522196	0.61657	0.569383
HLA-A1101	IFNLGDAFFK	NISWEYEGPEHVNFYVEYGVAGSKKQFHYP	RLKTFLRIYYGSS	0.616501	0.522052	0.569277
HLA-A0201	SLYPSTPLPVS	MMVEWVGEEKENWPCLTYVFSC	SSFRPLILVYSNCRKTYIVNDRPPCFQFCD	0.831453	0.306833	0.569143
HLA-A0201	TIINGKVCFL	KGGNAVVDGCGKAQNSTELAAEEYTLMSID	D	0.732623	0.405538	0.569081
HLA-A0101	KIDKFFKL	LKVMGFGLYLMDGNVSNIYKLDAKKRINLS	QVVPLFGDMQIELARYIKTSAHYEENKSKW	0.959838	0.178153	0.568995
HLA-A2402	RYQDRIHCVAY	LCDTMGLDGAEGAGLCMDDIPHILKGCMPD	VLDINSIDNLYSKMLAKVKQVHKEVLNCGI	0.723902	0.413895	0.568899
HLA-A0101	QTVEGQWLEW	EMRYGEEPEEEPKVKTQWPRSADEPGLYMA	GPWGPCSTSCANGTQQRSRKCSVAGPAWAT	0.64064	0.497044	0.568842
HLA-A1101	QTPDIKDLGAK	LEYWSQFMMVEQENIDPLHVIENSNAFSTP	ASLPLT	0.73945	0.398079	0.568764
HLA-A2402	QYHTEQHWTLL	GCAAHSAVAMGKHVYIFGGMTPAGALDTMY	KFDTLLPPGRLDHSMCIIPWPVTCASEKED	0.933221	0.203756	0.568489
HLA-A1101	TSSPGLSTEGK	GKGPFSVVRRCINRETGQQFAVKIVDVAKF	RWISNLKREASICHMLKHPHIVELLETYSS	0.630746	0.506151	0.568449
HLA-A2402	LFSVSTETL	NRRGSRWSGGMTFAGRRAPFNPLQRYIFIY	PRS	0.594213	0.542059	0.568136
HLA-A1101	RTAPGHPR	PAEAAPCPAEPERSQSAALEPSSSADAGEF	SSPGPGPETAVPQLLPVHFPQGTGPGSGSS	0.58543	0.550023	0.567726
HLA-A1101	QVEPIQPLLR	ISVINGTSPFAYDYDLTHIVAAYQERNGES	TFKVD	0.938279	0.197103	0.567691
HLA-A0201	YLIEMDSQFC	AQLLYKMIKSKTEYPLHKAIKVEREDVVFL	RLEV	0.952135	0.182874	0.567504
HLA-A0301	RTSCQLLGR	MVGKGAKGMLVSTEARLREGTGVPSPAP	LRKAGTARAPECPADPGLGR	0.510619	0.624245	0.567432
HLA-A0101	FDNIVGKQNY	EDIVKESVSSSDRRNSGATFTEGSWSPELP	SQMRDEVFKSNLVCAFIVLLFITAIQSLLP	0.785963	0.348774	0.567368
HLA-A1101	TMNELGFPGR	YSKQPSVFVKSTEEGIARVLNSNYAFLLES	V	0.647338	0.487115	0.567227
HLA-A0301	SAFADFGK	FQFEIWENLDGNFSVSTILEKPQNMMVVGQ	IW	0.973655	0.160557	0.567106
HLA-A0301	KTGQNHPFFR	QLERKRTRELLELGIDNEDSEHENDDDTNQ	RSDSMTFLGCIPPNPFEVPLAEAIPLADQP	0.623128	0.510497	0.566812
HLA-A1101	HVGGLPPAR	KGRDLAPRVSYTPAMRMTSTDYSLSATTHW	PALWTGTAPPRYRAPDSPAPTHCPLI	0.732881	0.400388	0.566634
HLA-A0301	AVVPALPGLPH	LEGARPPPERVLALSFRAPQVQSCTPRARE	GARPPSRGLGAARPR	0.886113	0.247149	0.566631
HLA-A0201	TMWKVSALLFV	RLGLWPRCFLIFPQLRILLLGPQESNNSTG	LGSASLWVLAEGGKL	0.992688	0.140459	0.566574
HLA-A0201	TMWKVSALLFV	RLGLWPRCFLIFPQLRILLLGPQESNNSTG	LGSASLWVLAEGGKTQRKWLPAVADGDERA	0.992671	0.140459	0.566565
HLA-A0201	RLLCHHPPL	WRIISSIEQKEENKGGEDKLKMIREYRQMV	STV	0.339296	0.793304	0.5663
HLA-A1101	SIPNLASIHNR	CKPHATAGPLYSDNSNISRYSEKEKGTYLN	FLDNVFLGDRRVFPDIILE	0.843698	0.28887	0.566284
HLA-A0301	CISGGFQSRK	GIEGQNHGRQLLPARGPQHPFISEDEKQEL	HGYEPRMFCVTTVCKKTQIQTAGRPDPGGA	0.666375	0.466141	0.566258
HLA-A0101	KVDTRFLF	CHLAEVPYLRILCQLEKGFQDQALQDTECG	PSD	0.98772	0.144423	0.566071
HLA-A0301	GQSAFADFGK	STFQFEIWENLDGNFSVSTILEKPQNMMVV	IW	0.35626	0.775861	0.566061
HLA-A1101	IFSGIGKK	RKTEPSAWSQDTGDANTNGKDWGRSWSDRS	C	0.988131	0.143786	0.565958
HLA-A1101	FVSIFIYKRK	QQRKLVEEIGWSYTGKHITYIMRFSRNFYC	LCSTTHHVNLAKWIVRLINRYIKYKTISYG	0.851418	0.28043	0.565924
HLA-A0301	IQKLVRWVGK	VSLSAESGKSEKGQPQNSKKQSPPKKNRAL		0.543251	0.588591	0.565921
HLA-A1101	GSFTQCHTY	QSKCRLERAQALEQAKKPQEAVFVPECGED	TGYCWCVTPDGKPISGSSVQNKTPVCSGSV	0.47422	0.657509	0.565865
HLA-A1101	YSSFLFGTRK	KRASNAFKTWNRKKPDHIRYQMASFPLPSS	LIINLHSSWITCNG	0.542854	0.588582	0.565718
HLA-A0101	TSGWWNTVY	RPSLPGSTASASAASSWCPLCFTPSPGRRA	TCSTGWSSISS	0.526801	0.604635	0.565718
HLA-A0301	YLYWGREK	RGPGPPTPAWAKPTNTQGKPLCPWAPPGSP	PSHLALPPLPTVAYSALLSSQGGSSCALSS	0.995905	0.135364	0.565635
HLA-A0101	TTDQVPRQK	MASGRRGWDSSHEDDLPVYLARPG	YGGMFCNVEGAFESKT	0.663376	0.467802	0.565589
HLA-A1101	TVCSPIGWR	TRGVGDGNSAATGFCDSRLVTSTPEHVLPE	PEQCPVPRKSPQER	0.655312	0.475528	0.56542
HLA-A1101	TTEIPCKYR	AYDSVPSCHSIYMRQEGFLAHPSRTEVKLS	SE	0.602786	0.528007	0.565396
HLA-A1101	GTACVPSVAHR	VDFPVPGPGGRGAGGAGSARQGERGLPVPR	RLPGAERAAPQRLRYLSL	0.802858	0.327927	0.565393
HLA-A1101	LTGGSNGFCEK	QNHLWVFPEKPVPAPKASWLEETRPNPFAA	KFPRL	0.653937	0.476531	0.565234
HLA-A2402	VHMPGNETI	ELQGYSAYSVSACRLRCEKEAVLQRCHCRM	CPPNIYIECADHTLGPCCLPFPTSPSASSC	0.420638	0.709282	0.56496
HLA-A0301	SAAKVLTR	AHVDQRSREVLQMWSVLQDGPISRVIVFSL	RGNPSTLGGRSGRIT	0.956294	0.173122	0.564708
HLA-A1101	RLGLGNGHYR	MGECAGGRVHLAQ	KKMNVPRPQTASFPALFPPRLASPAPRPLV	0.422786	0.706391	0.564588
HLA-A1101	TSYDYLKR	ASHLSEPAKPAHSQNQSNFSSYSSKFLGSY	NVKW	0.983578	0.145251	0.564415
HLA-A0201	VLNCFLWSL	IDYLLFSSFQEFLQRQVWLTTLTRGQLPKK	NGKILSSRKSKI	0.284029	0.844494	0.564262
HLA-A0301	SQAVPGPLR	PDTNIQVLLDLKYNLSAEGISCITCSGEAS	CPGPKDCWSERCRIQGPHQCQTSGKSHSPL	0.60984	0.518661	0.564251
HLA-A1101	SLSGKGKKK	RKVVEECKLIHPSKLNEVEQLLYYLQNRRD	KNQASLKIHLLLKEWRLMKLLTLMTWMNIL	0.771672	0.356826	0.564249
HLA-A1101	QTGNLLRK	KTVLKRVLKELWKLVMNTMEKTIVLPPLTD	HGKGLEKGRVKLPSHSDGTQMIFNAAKELG	0.957163	0.170997	0.56408
HLA-A0301	KVVKLLSNKR	PDEEHRLEDAETESQSAVSETPQKRSDAVQ	SQAVGILMSSLHLDMKDIQHAVVNLDNSVV	0.932349	0.195775	0.564062
HLA-A2402	AYYTYIFTNLL	DDKTATIIIHANASMSHTILLKAAELGMVS	SSALLFDAVYAVVTAVQELNRSQEIGVKPL	0.961733	0.166353	0.564043
HLA-A1101	RLLLAGAEAK	GWETRGDRKARKPLVEKKRRARINESLQEL	LENAEVLELTVRRVQGVLRGRARARAAAGG	0.774604	0.353449	0.564026
HLA-A0201	SQVEPIQPLL	NISVINGTSPFAYDYDLTHIVAAYQERNGE	RTFKVD	0.54988	0.577704	0.563792
HLA-A0201	GLAKVGDILA	KIMTFRPTMEEFKDFNKYVAYIESQGAHRA	PARPSISLRRGPADILGPSSASPTGVACAR	0.772145	0.355268	0.563706
HLA-A1101	LSLSQGFLHLK	NRADAESLLSLCKEGSYLVRLSETNPQDCS	FARTRENQVVLGQHSGPFPSVPELVLHYSS	0.791968	0.33531	0.563639
HLA-A1101	RTSCQLLGR	MVGKGAKGMLVSTEARLREGTGVPSPAP	LRKAGTARAPECPADPGLGR	0.417236	0.709449	0.563343
HLA-A0201	YTYIFTNLL	KTATIIIHANASMSHTILLKAAELGMVSAY	SSALLFDAVYAVVTAVQELNRSQEIGVKPL	0.196771	0.929788	0.56328
HLA-A0301	STTEIPCK	FAYDSVPSCHSIYMRQEGFLAHPSRTEVKL	YRSE	0.949463	0.17699	0.563226
HLA-A0301	FLPIQTQK	TGSHHTRSSSAMTVGPGGEVGTTAVGWTQY	LQC	0.97947	0.14669	0.56308
HLA-A1101	RLLLAGAEAK	GWETRGDRKARKPLVEKKRRARINESLQEL	LENAEVLELTVRRVQEREQLQAEASERFAA	0.771916	0.353449	0.562682
HLA-A1101	SSLTFPAQLRR	GGGGDAWDTGLQARRGTAAGTSGAPNRSQL	IGVSGRKPGAGGRLGPGSRTCAPRCLPRAR	0.91278	0.211429	0.562104
HLA-A0201	RLASPAPRPLV	QRLGLGNGHYRKKMNVPRPQTASFPALFPP	SGLFFLGERRWRWGGTWRRGRVPDCLQWVG	0.954774	0.169122	0.561948
HLA-A0301	RALIPGTAARR	AAAGDTRGRPWDPARHPTRTRCPRRLRAAE	RLHAVPVHGHVGLRGAGGVTGPLPGHGLQL	0.887725	0.236083	0.561904
HLA-A0101	NSEGSLLF	VGCDCSHTGFGGKFCSEEEHPMEGPAHLTL	SEGGAGRGGAGDVHQPTKGKEEFVATFKGN	0.950742	0.173009	0.561876
HLA-A0101	NSEGSLLF	VGCDCSHTGFGGKFCSEEEHPMEGPAHLTL	SEGGAGRGGAGDVHQPTKGQ	0.949982	0.173009	0.561496
HLA-A0301	LSQHVLHK	QPHFPDGTLFDEQYSQTASYPSHSPLARGA	PVCAFCEVRKL	0.961462	0.161453	0.561457
HLA-A1101	ISLEGLLK	NVTSTWNLASPLLSVSVDGTQRTVQVSVVR	SRILVSTCVANT	0.989519	0.132836	0.561178
HLA-A0301	GVNVTTEVK	TLLEALDCILPPTRPTDKPLRLPLQDVYKI	SVEMHHEALSEALPGDNVGFNVKNVSVKDV	0.662877	0.459199	0.561038
HLA-A0201	VLPPPPPEP	SKEDRSRSISGASSGLSTSPLSSPRPIRKL	PFVARPLATSTEPEACGSASRPGHVLPLQA	0.780985	0.340769	0.560877
HLA-A0301	RMASPCSMR	PRNRTSSTTGTGSTSGSDSTTGPSKATSCG	TGTLGSLTATSCLERTAWSWCGMIRDNGVT	0.245839	0.875683	0.560761
HLA-A0201	HLLLLPDRL	IVDETLDFGGLSPSDRSHPLAICSLHPKAQ	PQSGGEPGPVGEQQPVRRPEQPSCG	0.741083	0.38035	0.560716
HLA-A1101	VSTETLPR	GSRWSGGMTFAGRRAPFNPLQRYIFIYLFS	S	0.96447	0.15684	0.560655
HLA-A1101	ITYIMRFSR	CVCRLDWANGYYRQQRKLVEEIGWSYTGKH	NFYCFVSIFIYKRKLCSTTHHVNLAKWIVR	0.629858	0.491197	0.560528
HLA-A0201	HLLLLPDRL	IVDETLDFGGLSPSDRSHPLAICSLHPKAQ	PQSGGEPGPVGEQQPVRRPEQPSCGPASRM	0.740661	0.38035	0.560505
HLA-A0301	AVLVPQPPEY	LPSDGVGLSCPGWSAMAQSQLTAASASQVQ	LGL	0.733187	0.38761	0.560399
HLA-A0301	AVLTPFERVRR	FCTTLPPSFLRVDDRATSSTTDSSRAVSEM	DPPVCTVSYQRF	0.987955	0.13278	0.560368
HLA-A2402	SYYMKIFL	KNQASLKIHLLLKEWRLMKLLTLMTWMNIL	TKFGVLL	0.957798	0.162709	0.560254
HLA-A1101	GSLTATSCLER	TSGSDSTTGPSKATSCGRMASPCSMRTGTL	TAWSWCGMIRDNGVTCPATTTCPTPARWGW	0.59022	0.53006	0.56014
HLA-A0301	TLAPAGWTWR	MVSLRLRSNW	IWRKM	0.805238	0.314844	0.560041
HLA-A0201	NLQPQLQAI	NATISVEGIDHDVTSGGMVITGDCLYLETI	WQ	0.680048	0.4399	0.559974
HLA-A1101	RTGDPGASLGH	PNPLPKVLSRRGVGAGLEAAERESFERTQV	PEGRGVREGL	0.815693	0.304	0.559847
HLA-A1101	EVCGLGERPK	LPRVRSSDQEGEGSSRKGRHRSGQRRAGSG	GGWGRRRRRGGRKGEGNTRWGQS	0.525642	0.593591	0.559616
HLA-A0201	TMWKVSAL	RLGLWPRCFLIFPQLRILLLGPQESNNSTG	LFVLGSASLWVLAEGGKL	0.963926	0.155169	0.559547
HLA-A0201	HLLLLPDRL	IVDETLDFGGLSPSDRSHPLAICSLHPKAQ	PQSGGEPGPVGEQQPAHPPPSDPSWPHSLL	0.738698	0.38035	0.559524
HLA-A1101	SLVCWSMEK	EDDLGAVEEQRSVILHLLSQLKLGMDLTRV	STHFLYPVHMLGQF	0.437172	0.681801	0.559486
HLA-A0201	TMWKVSAL	RLGLWPRCFLIFPQLRILLLGPQESNNSTG	LFVLGSASLWVLAEGGKTQRKWLPAVADGD	0.963769	0.155169	0.559469
HLA-A0301	MSMPSLPPR	KIISNASCTTNCLAPLAKVIHDNFGIVEGL	RLWMAPPGNCGVMAAGLSRTSSLPLLALPR	0.169652	0.949276	0.559464
HLA-A1101	SLPSLVKR	TTYKSEIKYSCQEPYYKMLNNNTECGQPSR	IIGGRNAEPGLFPWQALIVVEDTSRVPNDK	0.988422	0.130251	0.559337
HLA-A0301	QKFGWMNLK	PMLVMFFGRQLHTLFLVALVMSSTRTTGDW	ISSTSYPQVLSKWIMEMCQSEKH	0.696594	0.421449	0.559022
HLA-A1101	SQTPGLQR	EEGGWWEGTLNGRTGWFPSNYVREIKSSGW	SSCPGLPKCWDYRGEPPCPGFISLNELHTN	0.952644	0.16537	0.559007
HLA-A0201	LVSSLNLNV	NPLKMSPHSLTCVTSSHWDRPYSREVAAFP	PAGKAWASSYPDGCTLLAS	0.603961	0.513992	0.558976
HLA-A0201	VLDPILGGPL	ITDVKIDDAGVYSCTAQNSAGSISANATLT	GRPCGICGRNSGPPMQSHGEPSAPHHLVQG	0.488312	0.62937	0.558841
HLA-A2402	ISNQVSHLF	LITGIGYEVMVSGFTQGHQTKPLRAEIVTG	LFLVPFCVICLPDRHDFNIFVHIPYLIHKC	0.59205	0.525474	0.558762
HLA-A0301	RAWYSRLSR	WVLAEGGKTQRKWLPAVADGDERAETCWNA	GARGS	0.277338	0.839765	0.558552
HLA-A1101	SSPRPIRK	DIAEAHPQFSKEDRSRSISGASSGLSTSPL	LVLPPPPPEPPFVARPLATSTEPEACGSAS	0.979988	0.136546	0.558267
HLA-A1101	GTGRFVLR	RTGAPARRPRPRPSFPVSLRSAAPPTGTAG	PGESGAGGGGDAWDTGLQARRGTAAGTSGA	0.923492	0.192763	0.558127
HLA-A1101	MTWMNILSY	SGKGKKKKNQASLKIHLLLKEWRLMKLLTL	YMKIFLTKFGVLL	0.255167	0.860636	0.557902
HLA-A0201	LLLPSFHL	EPGEDPRVTRAKYFIRDEFLDQHCQWRWAS	RCGH	0.989555	0.126054	0.557805
HLA-A0201	ILYRKPNGLVL	ADLAVAPLAITYVREKVIDFSKPFMTLGIS	MSGIIHTLATLTQTWWKTILPC	0.930934	0.184606	0.55777
HLA-A2402	AQPDRATLW	VKGWKLTQQQFVALLWKRLLIARRSRKGFF	QVPQPGTSALDVQRTVHICQQ	0.79245	0.323001	0.557725
HLA-A0301	VGNVLVRK	QGSGILHYAHGDSQQTHLLKQEAPWALVSV	RTHRVLVLKSRDRALI	0.941532	0.173919	0.557725
HLA-A1101	ATMVGHAWRRR	PAGTSVQAQPVLPTDSASRGGVAVVPASAP	KGSAAYVCLAMGGTCAMLASASATPAGTPS	0.988721	0.126703	0.557712
HLA-A1101	DVLEGDSSGPR	MAQLFLPLLAALVLAQAPAALA	FSRAHRGRRATAGRARRRPHHPLPRPLPAA	0.781794	0.333596	0.557695
HLA-A1101	FVLDLELAR	RGTLGCYAGLQWCSQPRSRKVLSREYRKIK	SFGGEGIEPI	0.662168	0.453197	0.557683
HLA-A0201	LLADNIWL	MVLILGCITCFSLFFFCNTATVYKICAWMQ	CCPGCSAVA	0.995467	0.11989	0.557679
HLA-A1101	ALALPATWER	AATAASARTRAPRAPVLTAAAATPTSPASS	GVSSQCTPTAQAPCPRPRRASGPGTLSATF	0.854073	0.261058	0.557565
HLA-A1101	YVGDLRSLR	AFETAENILGVTNFIHMLSRSRVRLSWATH	LNSGNAFGKKYPLIRASYESKGSRGLFILG	0.685473	0.429282	0.557378
HLA-A2402	PWAPPGSPYLY	LATYARPPRGPGPPTPAWAKPTNTQGKPLC	WGREKPSHLALPPLPTVAYSALLSSQGGSS	0.989825	0.12441	0.557118
HLA-A1101	LSVFPLQER	ATGKAEGAGFATTQTPLWLLGEVEAPRGGR	KRGRDEELFL	0.667068	0.447097	0.557083
HLA-A1101	ALEGEFQNEK	LLTCYSRETGTPIWTSRLPHCVFNQDSFEH	KKSSINQTNSTKQGQVFEYLYLDT	0.724947	0.38919	0.557068
HLA-A0201	KNWDLAWAV	HQHEYFFLIGPPLLIPMYFQYQIIMTMIVH	SYYIRFFITYIPFYGILGALLFLNFIRFLE	0.537749	0.576373	0.557061
HLA-A2402	EHVSRLEIF	QAKHQAECDLLEDMRTFSQKKAAIEREYAQ	SRGNNAGSPVSDEYM	0.707504	0.406578	0.557041
HLA-A1101	VLAEGGKTQRK	LLGPQESNNSTGTMWKVSALLFVLGSASLW	WLPAVADGDERAETCWNARAWYSRLSRGAR	0.805224	0.308602	0.556913
HLA-A0301	ELMKQLNIIQR	HISQAAAKVDVEFDYDGPLMKTEVPGPRSQ	LCIFSAITKRAEAITWLMWTATECWIFIPR	0.948931	0.164726	0.556828
HLA-A0301	ALFPAAPAPGL	PQARRAGGGDARCLWEACLPHWPQPRLSTL	EGPLY	0.895496	0.217429	0.556463
HLA-A0201	TLFDEQYSQT	PALPHDTAISGPLHYAPYHRSSAQPHFPDG	ASYPSHSPLARGALSQHVLHKPVCAFCEVR	0.628356	0.484486	0.556421
HLA-A0101	TTVVQGRFY	GAWLGALPIPLDWERPWQGAWYCEMSNLIL	SHFIH	0.556578	0.556188	0.556383
HLA-A0101	YSEKEKGTYL	TVNTLNAQYHSCKPHATAGPLYSDNSNISR	NSIPNLASIHNRFLDNVFLGDRRVFPDIIL	0.920278	0.192433	0.556355
HLA-A1101	AGCPQVLVQR	LHTEMVAELWAHDPDPGPGAAPGDAGLQGG	PVGGGVPEADGQPAHQSPGPDPTHQPLLSP	0.81686	0.295688	0.556274
HLA-A0101	ETNADTFCLY	MSGRGDGGQQQLLHSKFLAGFVCHIEKNEV	GVFLFLFFFSFSLFFFFHFSTLFAFFFCGG	0.293737	0.8188	0.556268
HLA-A0201	SEMELVSRL	DAVCFDVDSTVIREEGIDELAKICGVEDAV	QERNVQVFLISGGFRSIVEHVASKLNIPAT	0.246222	0.865912	0.556067
HLA-A1101	VSIDPLRVAVR	MASNFNDIVKQGYVRIRSRRLG	RFDCLSLEPASLEGGRRVPGRAPENCAVAF	0.944785	0.167297	0.556041
HLA-A0101	AVLVPQPPEY	LPSDGVGLSCPGWSAMAQSQLTAASASQVQ	LGL	0.79334	0.318625	0.555982
HLA-A2402	EFLDQHCQW	EFARYTTPEDATPEPGEDPRVTRAKYFIRD	RWASLLLPSFHLRCGH	0.330007	0.781881	0.555944
HLA-A0201	VLNSWPQAI	GRLLRRTLMRYVNLTSLLIFRSSLTMLPML	FPP	0.479276	0.632488	0.555882
HLA-A0301	KVLSREYRKIK	GCGLLQKREQSRGTLGCYAGLQWCSQPRSR	FVLDLELARSFGGEGIEPI	0.95817	0.153361	0.555765
HLA-A2402	RTPIHGFRW	SFGLGPHRGRLNIQAWRTAIYMMEPGVLRS	TLGTPPASRVLSHRAGTLSGGMTGSHHTRS	0.359772	0.751616	0.555694
HLA-A0301	GTGPSTLR	TPSNSFTRSSSLREMPPPMHTSSSTPLMRT	TLWLASPSCCGAQSTRSSSGPLISTTLTRM	0.960237	0.151148	0.555692
HLA-A1101	EAQNARVIVFK	DNAPKSVLGKVKIFEKMDHKARLQRMQELQ	LHIINKSFK	0.859549	0.251437	0.555493
HLA-A1101	TSAGEADIRR	LGITLLSAYMLAELILSTWEGGYNLQCQDL	TN	0.945774	0.164698	0.555236
HLA-A1101	SVYKVESNY	SRAFAGASQTHTLTSECPIPAFPHLVMSPV	LSLL	0.469522	0.640684	0.555103
HLA-A1101	NLGDAFFKR	SWEYEGPEHVNFYVEYGVAGSKKQFHYPIF	LKTFLRIYYGSS	0.833751	0.276307	0.555029
HLA-A0201	GTLAGGSVRV	PVPPGPTLLAFVEQRLSPDDSHAHRLVLRR	PGRPGQRNFLLWAVGCPARAGDSSPGGAPV	0.671952	0.438072	0.555012
HLA-A0301	AAYVHFTLISR	RFADLSHNRPTGGRSVLWMRPIALEMCRII	GI	0.889147	0.22076	0.554954
HLA-A1101	LMSMPSLPPR	LKIISNASCTTNCLAPLAKVIHDNFGIVEG	RLWMAPPGNCGVMAAGLSRTSSLPLLALPR	0.779548	0.330157	0.554853
HLA-A1101	LSWIKTRKK	PYVDILFGNETEAATFAREQGFEKVKSLLL	LLIPMELEMHLLEVFCLNWSLTSL	0.558911	0.550451	0.554681
HLA-A0301	SQLPNSFIMR	GKSGEPAGSPAAEWFGTPRSRTSPSPSSAA	S	0.474584	0.634382	0.554483
HLA-A0201	IMSAVPFL	LAFMLVEGNFVLFCTYTLGFRNEFQNLLLA	ILVALMESNLIITYAVAVAAGISVAAAFLL	0.985916	0.122938	0.554427
HLA-A0201	SLPEVYSVA	MQVSSLNEVKIYSLSCGK	QAGVQWHNHGSPQP	0.244736	0.864091	0.554414
HLA-A1101	SLTFPAQLR	GGGDAWDTGLQARRGTAAGTSGAPNRSQLS	RIGVSGRKPGAGGRLGPGSRTCAPRCLPRA	0.692605	0.416099	0.554352
HLA-A0301	APFNPLQR	TTDYVAYVAKDPVNRRGSRWSGGMTFAGRR	YIFIYLFSVSTETLPRS	0.988814	0.11982	0.554317
HLA-A1101	SEFQALLK	NCPDADIQAMEDSLLQIQDSWATHNRQFEE	RLPDDRFLNSTAISQFWAMDTSLQHRYQQL	0.989467	0.119123	0.554295
HLA-A0101	FSGPSPGY	AGVVIKQEQTDFAYDSDVTGCASMYLHTEG	GYEKPLRPFPDDVCVVPEKFEGDIKQEGVG	0.977046	0.131381	0.554213
HLA-A1101	GDFHQVGR	KGSQEYKKAEKKVWKIFKSDSEVAGYIRQA	CLGAGRLWEWESGIENKA	0.927731	0.180479	0.554105
HLA-A1101	LLKEWRLMK	QLLYYLQNRRDSLSGKGKKKKNQASLKIHL	LLTLMTWMNILSYYMKIFLTKFGVLL	0.563	0.5451	0.55405
HLA-A0301	SLCSFPGTAR	SGGSAGLLQQILSLKVVPRVGNGTLCPNST	PAPAHCAPRRRRCRAVGAPSLGGVPGAQPA	0.401578	0.705979	0.553778
HLA-A1101	NTPEGAMASR	PGLEPFSHYTLNVRVVNGKGEGPASPDRVF	QVDIATQGWFIGLMCAVALLILILLIVCFI	0.722977	0.384138	0.553557
HLA-A1101	AAAPPRAQVR	GLGAQPGRLLRPSRHHHPGHLCVLPGHLRA	AAHTARGAAAAGDTRGRPWDPARHPTRTRC	0.794973	0.312079	0.553526
HLA-A1101	SYPQVLSK	LFLVALVMSSTRTTGDWQKFGWMNLKISST	WIMEMCQSEKH	0.966077	0.140856	0.553466
HLA-A0301	SSGVVFLYR	MAQLFLPLLAALVLAQAPAALADVLEGD	EGSARYAFSFSGAQEACARIGAHIATPEQL	0.969389	0.137456	0.553422
HLA-A0201	SIDTIINGKV	DICKGGNAVVDGCGKAQNSTELAAEEYTLM	CFLD	0.513842	0.592939	0.55339
HLA-A0201	HLYDTIVLS	TVGVDFALKVLQWSDYEIVRLQLWDIAGAL	GCLCLCYYV	0.759234	0.347509	0.553371
HLA-A1101	ASGGGGGEK	SMVGQASISGSEDITTSPQLSKMPSTSLSL	SKLRPKELPRGEISWRWLPSFESLRWSQKM	0.73359	0.373133	0.553361
HLA-A1101	LTFPAQLR	GGDAWDTGLQARRGTAAGTSGAPNRSQLSS	RIGVSGRKPGAGGRLGPGSRTCAPRCLPRA	0.940707	0.165992	0.553349
HLA-A0301	AIVVWDCIPK	RTGVKEAVTTLIASGVSIKMITGDSQETAV	LPSQSQEKK	0.660424	0.446159	0.553291
HLA-A0101	FHDQPHLKRIY	QIVAGVNYFLDVELGRTTCTKTQPNLDNCP	AVPWQGTMTLSKSTCQDA	0.968648	0.137753	0.5532
[truncated: 273,736+ more rows]
